# Supplementary material for: Heat waves reveal additive genetic effects leading to sunburn resilience of grapevine berries
Source: Front Plant Sci. 2025 Jun 30;16:1533345. doi: 10.3389/fpls.2025.1533345 (PMC12256528; doi:10.3389/fpls.2025.1533345)
Supplement: Supplementary Table 1 — Annotated genes under the LODmax -1 QTL-Intervals for sunburn on chromosomes 10 and 11 and corresponding RNA-expression studies. [file Table1.xlsx]

## Sheet: GREAT_TPM_sample_data
samples_filtered_table_CRIBI	ERR5946189	ERR5946190	ERR5946191	ERR5946192	ERR5946193	ERR5946194	ERR5946195	ERR5946196	ERR5946197	ERR5946198	ERR5946199	ERR5946200	ERR5946177	ERR5946178	ERR5946179	ERR5946180	ERR5946181	ERR5946182	ERR5946183	ERR5946184	ERR5946185	ERR5946186	ERR5946187	ERR5946188	SRR4425617	SRR4425618	SRR4425619	SRR4425620	SRR4425622	SRR4425624	SRR4425626	SRR4425631	SRR4425632	SRR4425633	SRR4425634	SRR4425637	SRR4425638	SRR4425639	SRR4425641	SRR5534893	SRR5534894	SRR5534895	SRR5534899	SRR5534900	SRR5534901	SRR5534905	SRR5534906	SRR5534907	SRR5534911
Vitvi10g00326	100.75	95.4	77.79	62.5	72.84	69.86	54.34	55.27	55.17	30.21	32.77	27.74	80.98	99.61	92.26	62.44	65.46	78.4	37.21	44.07	47.44	31.32	37.35	27.36	91.9	94.31	124.99	143.51	132.67	93.19	80.79	78.8	70.86	59.34	52.83	28.13	26.28	27.36	53.29	158.9	152.48	157.74	130.77	129.56	121.45	70.03	60.55	65.7	34.31
Vitvi10g00334	0	0	0	0	0	0	0	0	0	0	0	0	0	0.06	0	0	0	0	0	0.05	0	0	0	0	0	0	0	0	0	0	0.06	0	0.05	0	0.12	0	0	0	0.08	0	0	0	0	0	0	0	0	0	0
Vitvi10g00336	19.5	23.81	24.73	17.51	16.75	18.18	21.56	23.43	21.53	19.52	30.85	25.76	17.23	21.44	22.37	14.23	19.88	22.53	17.09	24.81	20.91	33.06	27.39	20.09	19.49	22.61	24.78	20.2	22.02	24.75	22.34	20.33	20.93	32.75	36.03	44.66	42.19	45.43	35.38	22.05	21.24	19.36	22.02	23.73	24.32	20.58	22.94	20.48	27.08
Vitvi10g00339	1.1	1.88	1.83	0.79	1.05	1.23	0.79	0.84	0.92	0.78	1.23	1.12	1.56	1.82	1.64	0.41	0.78	0.93	0.24	1.33	0.9	1.49	1.16	0.82	0.99	0.9	3.52	3.15	4.03	0.82	1	0.97	0.82	1.57	1.89	2.66	2.5	2.55	1.37	6.7	6.74	5.88	3.54	3.68	3.64	1.98	1.9	1.78	2.16
Vitvi10g00341	0	0.06	0.13	0	0	0	0	0	0	0	0	0	0.15	0.62	0.78	0	0.08	0	0.07	0	0	0	0	0	0	0.1	0.58	0.33	0.51	0.05	0	0	0	0	0	0	0	0	0	0.05	0	0	0	0	0	0	0	0	0
Vitvi10g00342	0.09	0.03	0.05	0.06	0.15	0.21	0.12	0.11	0.08	0.2	0.39	0.15	0.33	0.29	0.24	0.67	0.24	0.73	0.52	0.6	0.45	0.53	0.35	0.51	0.26	0.22	0.44	0.23	0.57	0.17	0	0.05	0.04	0.03	0.06	0.06	0.27	0.24	0.11	0.09	0.04	0.09	0.07	0.08	0.02	0	0.02	0.02	0.02
Vitvi10g00343	223.05	157.04	120.95	159.07	151.24	119.37	167.59	159.64	158.39	88.15	62.32	46.24	109.29	115.17	98.61	154.82	97.42	128.22	138.62	102.68	107.77	11.18	15.08	60.73	109.05	106.57	132.51	126.82	138.75	80.94	55.03	58.77	67.71	27.51	33.98	21.52	20.74	19.43	30.61	192.33	169.88	166.53	123.58	153.27	120.12	80.48	70.66	64.56	19.66
Vitvi10g00344	5.84	8.88	5.18	3.66	2.55	3.96	0.91	0.89	0.43	0.09	0.22	0.02	0.84	2.17	0.7	0.61	0.4	0.12	0	0.1	0.22	0.61	0.35	0.03	3.14	2.19	12	15.18	17.46	1.82	1.62	0.71	0.69	0.93	0.82	0.07	0.08	0	0.87	9.4	9.46	11.66	2.01	1.19	1.08	0.21	0.09	0.04	0.24
Vitvi10g00345	0.04	0	0	0	0.06	0	0.13	0.04	0.2	0.44	0.32	0.21	0	0	0.05	0	0.16	0.05	0	0	0	0.17	0.34	0.24	3.35	2.51	9.56	15.03	14.78	2.07	1.88	1.98	1.09	1.28	0.83	0	0.05	0	0.63	0.15	0.28	0.1	0.14	0.17	0	0.05	0.86	0.42	1.8
Vitvi10g00349	3.29	4.98	6.47	3.96	6.46	7.32	5.92	9.67	10.46	8.18	14.69	14.06	3.4	4.66	4.39	2.39	4.88	5.02	2.37	6.29	6.83	10.69	8.51	8.4	3.79	3.87	10.93	10.6	12.28	3.26	9.73	9.4	7.15	5.76	7.69	13.44	12.65	13.66	7.59	3.63	3.66	3.06	1.57	1.97	1.29	10.84	9.61	9.35	10.64
Vitvi10g00358	11.65	21.44	18.17	20.1	11.95	20.37	7.22	5.9	6.42	5.22	5.9	5.65	28.67	58.44	23.66	24.7	20.62	19.02	10.2	9.12	6.35	8.94	6.23	10.72	26.68	24.75	88.15	106.68	101.23	27.43	15.74	16.35	13	10.29	10.78	8.69	8.14	9.46	16.15	16.33	16.21	11.3	1.75	1.67	1.69	0.51	0.86	0.48	1.38
Vitvi10g00359	9.21	10.84	6.07	13.85	12.84	8	12.68	11.17	10.21	11.02	12.96	13.38	5.74	6.06	6.58	10.11	10.8	6.79	9.42	9.35	7.68	9.57	7.06	11.01	14.11	13.36	33.83	32.1	41.43	12.05	5.15	5.7	4.71	5.4	4.74	3.76	5.06	5.1	5.71	24.85	22.34	16.62	13.29	15.62	13.71	8.34	8.86	8.62	4.06
Vitvi10g00363	18.5	18.45	21.77	20.59	18.36	19.4	17.28	16.73	16.01	19.54	23.61	21.09	24	21.32	23.42	20.4	20	20.88	19.42	19.33	19.04	25.03	22.78	20.55	16.49	16.76	19.82	26.86	21.35	17.78	16.96	14.19	13.93	24.68	25.92	47.88	40.85	45.07	27.77	15.56	15.33	14.8	17.68	17.84	17.52	15.31	13.57	13.78	21.33
Vitvi10g00364	0.86	0.46	3.68	2.48	0.66	2.24	0.5	0.18	0.15	0	0.02	0	1.93	1.03	1.39	0.21	0.3	0.12	0	0	0	0	0	0	0	0.09	0.94	1.41	0.45	0.09	0	0	0	0.12	0	0.11	0	0	0	0.02	0.04	0	0	0	0	0	0	0	0.03
Vitvi10g00365	6.83	9.92	12.64	8.99	8.11	10.16	12.19	14.04	14.43	9.6	13.95	14.37	8.12	9.51	9.1	3.84	5.9	6.25	6.74	11.31	8.88	11.84	12.39	6.99	7.6	6.82	15.66	15.95	15.04	7.32	13.34	10.9	9.85	12.68	14.12	14.57	13.4	13.63	11.77	13.35	13.81	11.6	11.95	11.91	12.44	14.1	15.72	15.23	16.74
Vitvi10g00366	29.68	36.28	32.04	25.13	29.5	27.7	33.43	33.48	31.71	25.98	30.32	23.81	27.22	32.36	31.22	23.83	28.55	26.83	27.68	34.28	36.24	23.24	20.52	24.75	19.3	20.02	37.46	36.24	34.79	22.76	23.78	20.86	17	28.04	24.53	39.9	37.64	46.52	27.38	42.8	39.39	41.82	38.73	39.98	40.38	26.82	31.66	27.99	22.56
Vitvi10g00370	0.82	0.6	4.17	2.42	1.33	3.19	0.38	0.4	0.3	0.03	0.06	0	5.45	1.73	3.3	1.31	0.92	1.52	0.22	0.33	0.08	0	0.06	0.03	0.45	0.8	0.22	0	0	0.77	0	0.05	0.1	0	0	0	0	0	0	0	0	0	0.08	0	0	0	0	0	0
Vitvi10g00372	23.23	32.44	15.48	2.28	0.98	1.89	0.35	0.28	0.27	0	0.04	0	10.3	15.29	15.02	0.2	0.28	1.37	0	0.19	0.35	0	0	0	5.62	6.9	51.79	46.28	45.8	3.01	0	0	0.05	0	0	0	0	0	0	214.39	203.67	243.86	44.44	25.24	43.92	0.74	0.4	1.03	0
Vitvi10g00379	7.26	11.41	9.68	6.84	8.17	7.67	7.7	9.03	8.05	5.88	9.06	6.42	6.85	10.37	8.83	4.89	6.25	7.26	3.81	5.13	5.78	13.08	10.6	4.54	3.3	4.15	7.62	7.68	7.2	3.75	4.41	3.66	3.44	4.28	6.95	8.99	8.43	9.18	5.03	12.2	11.12	10.34	10.44	14.12	10.46	5.78	6.75	5.5	9.34
Vitvi10g00380	13.18	10.42	18.91	19.72	19.26	21.14	11.48	9.3	8.08	8.22	8.82	8.08	19.3	15.82	18.49	19.12	16.62	16.92	10.05	9.4	6.07	9.63	9.53	8.6	16.14	17.63	24.17	19.26	23.42	21.02	11.36	9.76	10.7	10.74	11.59	22.3	20.49	24.5	13.18	8.62	9.68	7.53	8.31	9.73	9.73	4	3.88	3.32	8.1
Vitvi10g00381	7.78	8.36	10.89	4.84	6.82	9.9	3.66	4.34	4.84	1.23	1.89	2.46	8.06	10.34	9.23	8.7	11.59	10.15	4.46	5.74	3.51	2.35	2.03	2.36	15.94	20.42	21.5	25.75	16.96	17.39	8.36	7.39	9.19	9.43	6.01	8.04	10.48	3.74	7.85	18.61	19.05	16.79	19.25	14.54	18.51	7.05	9.28	8.26	7.82
Vitvi10g00382	40.91	43.31	45.26	32.1	39.19	41.51	30.79	36.57	33.9	21.6	42.52	39.89	55.8	69.56	65.42	50.41	68.13	73.5	38.42	79.64	76.34	32.92	41.25	61.74	66.67	69.11	72.93	69.33	70.1	79.95	74.29	70.53	65.25	93.69	86.18	104.44	100.64	102.68	86.9	62.53	62.18	70.8	79.4	81.12	74.98	65.02	72.23	67.99	82.68
Vitvi10g00383	2.79	2.78	4.55	3.71	4.83	3.6	3.9	4.75	4.95	4.17	6.57	6.4	6.6	5.92	6.24	5.48	5.61	5.83	4.28	4.75	4.97	9	8.59	5.98	12.46	9.2	15.38	15	16.35	11.31	20.55	18.38	12.36	30.56	30.33	32.95	30.37	33.65	33.54	3.11	2.6	3.27	3.2	3.83	4.54	5.7	5.15	5.15	12.86
Vitvi10g00384	12.22	12.32	13.79	15.65	13.83	14.64	15.36	15.43	16.23	14.08	14.77	12.51	14.46	15.15	14.93	20.31	20.2	19.42	18.15	17.55	18.47	17.18	13.25	12.58	25.62	26.15	19.34	18.85	22.03	28.81	24.84	23.31	19.86	19.21	19.18	28.24	26.25	26.72	19.04	9.21	9.68	8.82	12.11	15.29	14.26	11.63	9.63	9.96	13.06
Vitvi10g00385	0.08	0	0.04	0.12	0.17	0.04	0.03	0	0	0	0.03	0.08	0	0	0	0	0	0	0.05	0	0	0.45	0.08	0.04	0	0.35	0.2	0	0.23	0.2	0.74	0.39	0.25	1.74	1.15	0.44	0.43	0.14	0.93	0.14	0	0.2	0.03	0.26	0.16	0.1	0.05	0.46	0.29
Vitvi10g00386	48.47	50.61	45.01	43.4	43.33	40.66	46.42	44.44	44.84	38.39	47.91	46.31	49.92	58.96	54.84	66.74	58.73	67.52	58.1	59.4	57.53	48.65	49.42	44.8	47.51	48.16	43.23	34.8	38.7	44.29	38.54	41.68	44.08	64.22	65.16	117.56	112.74	112.86	73.89	45.89	47.2	49.1	58.72	61.83	55.76	44.87	42.31	48.1	67.2
Vitvi10g00387	28.23	25.27	30.12	27.41	23.63	23.77	29.15	29.65	26.46	28.53	31.61	27.36	29.74	27.68	25.82	27.06	26.62	28.04	28.99	29.26	26.18	37.99	28.48	25.23	20.08	21.21	24.04	29.94	24.53	22.34	25.92	23.96	23.78	31.23	31.3	43.63	38.17	40.38	33.18	20.12	21.27	17.01	24.5	27.29	26.05	27.67	23.67	21.44	28.09
Vitvi10g00390	6.83	6.18	3.81	4.66	4.71	3.58	2.64	2.66	2.03	1.37	2.16	1.28	7.5	12.48	10.38	15.97	7.55	11.97	7	4.27	4.3	3.81	4.38	3.88	5.28	4.67	31.14	33.96	41.68	6.02	7.24	6.39	8.72	4.46	8.29	15.39	11.48	12.58	5.14	5.48	5.56	7.03	2.26	2.12	1.76	0.71	0.53	0.25	1.13
Vitvi10g00391	7.89	9.32	8.81	6.68	8.55	8.03	6.51	8.23	7.58	14.82	19.95	15.6	4.61	6.2	5.45	6.4	4.23	6.52	8.28	6.38	5.54	17.49	14.22	18.07	29.51	24.85	8.95	12.55	11.07	29.35	41.42	42.21	40.7	33.95	34.85	32.85	31.14	37.37	35.32	5.42	4.16	4.67	7.55	9.46	7.89	6.52	6.83	6.3	8.22
Vitvi10g00394	136.45	160.42	122.61	130.81	123.64	97.12	186.5	184.73	172.68	138.76	158.83	123.84	107.48	134.48	118.47	116.62	114.42	129.25	163.7	152.45	175.68	131.1	126.73	118.87	73.41	78.17	83.24	84.06	79.53	78.33	83.45	87.94	77.81	98.22	103.21	103.93	102.92	102.63	113.96	101.73	91.4	99.75	83.21	83.6	87.49	83.52	90.26	80.48	68.22
Vitvi10g00397	151.57	166.76	153.41	163.3	145.77	147.07	163.28	159.82	157.62	149.74	138.41	117.54	177.79	179.16	175.37	235.42	152.81	170.83	182.24	148.92	159.37	112.74	115.7	121.98	165.65	168.31	234.58	228.87	236.77	163.95	152.78	148.78	137.25	161.24	153.71	149.3	145.75	177.81	169.85	213.53	216.73	201.69	200.4	184.98	208.22	132.23	144.56	117.29	106.76
Vitvi10g00398	28.25	24.55	18.12	21.36	21.37	17.19	17.28	17.55	15.82	9.67	10.12	6.79	22.11	27.11	22.18	44.81	28.15	31.98	28.48	22.99	21.44	5.18	6.81	5.81	29.74	28.38	22.33	23.49	21.94	28.68	4.36	4.44	4.21	3.97	3.52	3.6	3.59	3.15	4.72	22.4	21.07	20.36	27.54	27.63	30.3	10.49	9.91	8.94	3.22
Vitvi10g00399	0.14	0.09	0.22	0.07	0.13	0.04	0.1	0.05	0.15	0.32	1.59	0.54	0.15	1.19	0.36	0.6	0.27	0.19	0.89	0.73	0.55	1.38	0.68	0.82	8.11	6.94	3.94	4.07	5.91	21.01	3.14	2.93	3.8	16.76	17.99	11.22	9.56	7.22	24.15	0.12	0.19	0.14	0.02	0.03	0.09	0.27	0.39	0.38	3.69
Vitvi10g00400	8.5	17.44	19.38	25.52	21.77	14.28	17.24	13.05	19.39	9.77	12.58	8.95	14.97	10.23	10.91	63.53	33.91	34.35	23.86	22.31	10.41	8.05	11.67	8.81	24.94	24.03	33.28	33.9	23.79	29.12	5.6	5.85	5.06	22.89	29.02	337.15	289.66	279.14	31.13	10.02	8.45	7.06	3.25	3.13	3.33	2.16	2.78	2.18	11.33
Vitvi10g00401	36.41	42.22	46.31	29.22	40.83	39.58	33.69	38.28	35.59	21.39	29.52	23.08	42.2	55.67	51.17	37.7	37.53	38.69	31.42	40.98	40.91	28.14	29.18	27.29	30.87	31.3	61.46	54.4	64.61	32.86	20.33	23.35	21.25	21.56	22.97	30.55	25.38	29.65	23.44	83.73	83.68	80.19	58.98	60.16	61.45	43.55	43.7	45.88	25.42
Vitvi10g00402	0	0	0	0.1	0.02	0	0	0	0	0	0	0	0	0	0	0	0	0	0	0	0.04	0	0	0	0	0	0.17	0	0	0	0	0	0	0	0	0	0	0	0	0	0	0	0	0	0	0.13	0.23	0.23	1.76
Vitvi10g00403	0	0	0	0	0	0	0	0	0	0	0	0	0	0	0	0	0	0	0	0	0	0	0	0	0	0	0	0	0	0	0	0	0	0	0	0	0	0	0	0	0	0	0	0	0	0	0	0	0
Vitvi10g00405	0	0	0	0	0	0	0	0	0	0	0	0	0	0	0	0	0	0	0	0	0	0	0	0	0	0	0	0	0.26	0	0	0	0	0	0	0	0	0	0	0	0	0	0	0	0	0	0	0	0
Vitvi10g00406	0	0	0	0	0	0	0	0	0	0	0	0	0	0	0	0	0	0	0	0	0	0	0	0	0	0	0.22	0.98	0.13	0	0	0	0	0	0	0	0	0	0	0	0	0	0	0	0	0	0	0	0
Vitvi10g00416	9.24	14.73	13.91	9.87	12.4	12.78	12.3	13.41	11.87	11.63	15.38	11.74	10.7	12.61	12.53	6.69	8.92	10.68	8.28	9.36	10.03	16.07	13.57	10.3	9.16	9.62	18.55	17.63	19	11.19	12.87	11.54	9.72	13.93	15.59	24.06	21.37	24.19	18.17	13.02	13.35	11.42	11.73	14.57	14.32	13.19	11.75	10.2	10.13
Vitvi10g00417	12.11	15.37	11.68	10.5	9.68	8.38	8.6	8.56	8.43	8.93	11.71	9.6	11.26	14.48	11.96	7.68	8.94	9.78	6.51	7.4	7.8	11.17	8.25	7.1	10.82	11.26	19.36	19.85	21.7	8.93	8.5	7.44	8.68	4.7	4.29	10.85	10.8	9.65	4.73	21.55	23.89	19.85	19.9	25.41	24.86	7.98	6.92	6.16	7.13
Vitvi10g00418	79.73	79.01	70.47	72.33	77.79	67.47	94.92	95.7	97.03	95.08	88.15	85.46	64.53	65.31	65.66	67.16	62.56	65.59	91.89	80.2	73.5	88.52	70.72	58.33	31.91	30.84	59.68	58.89	55.3	28.8	54.8	51.21	53.91	73.25	62.9	69.69	72.6	66.65	74.99	71.76	63.95	54.6	41.44	48.28	42.58	58.47	44.69	58.92	61.4
Vitvi10g00422	0.29	0.55	0.49	1.05	0.62	0.3	0.48	0.39	0.58	0.59	0.95	0.84	2.67	1.72	3.04	7.91	5.41	6.44	1.55	3.82	1.59	1.56	1.42	2.27	7.01	5.76	17.6	15.51	14.33	7.06	1.03	0.62	0.44	3.06	2.98	8.79	9.75	10.35	2.86	2.78	3.49	2.57	0.3	0.42	0.47	0.17	0.09	0.16	1.66
Vitvi10g00423	0	0	0.09	0.39	0.24	0.16	0.13	0.04	0	0	0	0	0.22	0.16	0.05	0	0	0.1	0	0	0	0	0.05	0	0	0	0	0	0	0	0	0	0	0	0	0	0	0	0	0.04	0	0	0	0	0	0	0	0	0
Vitvi10g00425	13.8	17.17	17.71	14.76	15.47	15.76	15.01	15.78	13.47	17.85	24.85	20.6	15.9	22.78	20.08	14.45	18.57	17.32	12.13	15.38	16.36	31.53	21.96	19.45	29.13	26.05	41.67	39.88	47.03	33.97	35.65	36.15	30.82	36.81	40.71	47.66	42.74	47.69	45.76	12.8	14.84	12.11	12.35	16.74	14.94	13.51	12.32	9.75	17.37
Vitvi10g00426	33.35	32.66	24.58	33.02	24.57	23.45	25.58	21.16	22.88	15.49	13.01	10.31	21.99	24.84	21.27	22.62	15.78	20.03	17.31	13.78	15.82	19.1	16.46	10.27	14.66	10.35	11.6	8.14	9.48	9.55	5.96	5.72	4.65	6.47	6.5	11.02	10.77	10.76	7.71	28.54	24.44	27.38	23.42	23.8	22.52	12.12	11.68	12.69	6.5
Vitvi10g00427	0.05	0.25	0.31	0	0.04	0.07	0.2	0	0	0	0	0	0.51	1.74	0.32	0.08	0.07	0.09	0	0	0	0.04	0	0	0.09	0.31	0.81	1.12	0.44	0.04	0.09	0	0	0	0	0	0.03	0	0	0.09	0.14	0.06	0.09	0.18	0.1	0	0.03	0	0.03
Vitvi10g01600	0	0	0	0	0	0	0	0	0	0	0	0	0	0	0	0	0	0	0	0	0	0	0	0	0.16	0.03	0	0	0	0.15	0	0	0	0	0	0	0	0	0	0	0	0	0	0	0	0	0	0	0
Vitvi10g01737	3.29	1.78	4.82	2.5	3.42	2.61	6.72	27.57	18.25	21.73	50.86	46.06	14.7	9.94	15.18	2.74	4.35	8.88	9.53	24.71	18.84	7.13	28.78	29.28	54.97	61.59	75.4	105.35	78.28	62	122.31	117.46	135	148.11	129.11	1.51	0.99	0	99.2	1.24	0.96	2.11	3.52	3.51	2.59	9.46	18.58	8.76	13.47
Vitvi10g01738	1.42	0.85	1.3	1.54	1.57	1.62	0.26	0	0.67	0.61	0.37	0.33	0.28	2.26	1.37	0.28	0	0.2	0.21	0.26	0.22	0.24	0.18	0.51	0.64	0.6	0	0	0	0.29	0	0.55	0	0	0	0	0.2	0	0	0.15	0.24	1.3	0.58	0.79	1.37	0.21	0.9	0.19	0.81
Vitvi10g01740	7.28	7.31	12.41	7.59	7.46	8.05	6.52	6.58	6.33	8.97	11.24	11.25	9.98	13.24	10.6	8.6	9.45	9.7	5.27	5.97	6.37	19.8	13.73	12.76	14.2	14.89	22.85	23.96	22.65	13.88	17.46	16.4	15.14	25.42	25.05	23.22	24.66	22.03	24.19	10.15	10.85	8.88	9.18	11.83	9.74	6.55	5.3	5.77	12.46
Vitvi10g01742	0.14	1.11	0.15	0	0.2	0.13	0.43	0.57	0.27	0.12	0.2	0.18	0.93	3.97	1.92	0	1.1	0	0	0	0.54	0	0	1.52	2.6	2.45	2.38	4.6	3.23	1.65	1.8	0.67	0.66	1.17	2.27	2.75	1.84	5.85	2.51	4.88	5.24	3.37	6.17	7.5	5.99	2.73	3.13	2.85	2.16
Vitvi10g01746	19.98	17.34	9.89	4.33	4.73	7.25	2.75	1.78	1.43	0.13	0.17	0.29	10.38	12.38	10.05	3.31	3.65	3.43	0.96	1.13	0.95	0.61	0.1	0.1	3.27	3.08	2.5	2.41	1.83	2.3	0	0.31	0.31	0.12	0.2	0.32	0.17	0	0	23.13	22.56	29.07	28.94	27.75	26.2	3.4	3.09	3.21	0.52
Vitvi10g01748	6.9	10.79	10.56	14.4	13.67	8.46	21.8	23.68	20.22	12.31	18.98	11.65	11.29	19.72	14.61	11.13	11.57	10.84	21.27	21.04	18.45	12.15	16.16	15.09	42.36	29.57	55.35	59.46	53.22	48.41	56.72	44.73	43.3	43.19	39.39	39.88	42.18	37.71	43.03	12.08	13.32	14.68	12.31	11.32	14.99	29.53	34.69	28.4	16.22
Vitvi10g01749	6.17	6.42	6.92	4.24	4.9	6.36	3.08	3.3	3.59	2.62	3.53	2.25	6.4	6.31	7.06	2.43	4.04	4.11	2.3	3.4	3.02	3.1	2.95	2.39	4.43	5.22	8.41	7.4	9.12	6.03	3.58	3.39	3.2	4.65	5.56	4.47	4.62	7.96	5.44	6.13	7.08	6.93	8.36	8.22	9.01	4.12	3.92	3.64	2.78
Vitvi10g01751	4.3	4.08	4.67	4.04	3.74	4.07	3.58	3.84	3.76	2.37	2.66	2.2	4.3	4.53	4.28	4.01	3.92	3.63	2.69	2.77	2.5	1.88	2.12	2.36	5.61	8.17	7.98	8.46	7.38	6.15	4.7	3.83	3.82	4.13	3.52	1.65	2.07	2.13	3.95	4.68	5.86	4.77	5.32	5.37	6	3.14	2.24	2.69	1.78
Vitvi10g01753	25.74	26.05	21.29	23.25	17.12	16.41	13.75	15.41	12.65	48.38	51.68	37.59	41.14	44.64	51.34	46.58	35.08	42.51	82.12	92.23	98.6	40.32	67.48	75.52	71.22	56.31	39.94	24.65	33.49	57.97	103.87	98.61	89.37	117.71	106.01	104.39	131.58	102.05	123.3	87.65	105.81	95.23	97.64	105.16	96.35	103.37	97.27	122.66	74.4
Vitvi10g01754	2.93	5.2	3.51	3.94	1.28	2.67	6.38	7.35	5.92	1.98	5.18	3.42	1.68	6.87	3.92	2	0.79	0.72	3.48	4.04	3.93	1.12	5.7	18.48	12.74	14.15	19.15	25.43	23.89	10.54	2.23	2.92	5.68	7.74	6.55	1.77	2.17	1.41	3.62	5.96	6.44	8.45	1.88	3.6	4.32	17.49	16.21	13.93	3.12
Vitvi10g01756	13.59	14.8	8.56	9.1	10.27	14.88	7.63	10.82	10.26	6.48	12.8	4.6	15.41	25.96	17.31	15.35	11.91	12.24	16.13	13.05	6.55	4.5	8.65	12.32	103.44	93.4	97.24	65.24	120.62	96.57	14.1	17.85	14.84	18.15	9.83	11.91	12.76	6.33	12.41	4.88	6.44	7.94	4.62	6.86	7.83	10.35	15.95	15.07	5.51
Vitvi10g01757	39.14	42.03	35.25	31.05	28.43	29.85	32.31	34.19	32.76	30.78	28.85	28.67	54.07	56.31	53.4	49.59	44.46	48.2	56.09	48.17	49.59	28.33	29.93	36.56	29.12	32.34	31.1	30.22	33.57	27.71	26.96	26.31	26.79	26.15	23.56	26.53	26.74	29.28	24.17	44.31	41.73	42.47	42.2	40.26	44.73	30.27	34.89	31.2	30.29
Vitvi10g01760	3.92	4.22	4.17	3.82	3.92	4.96	4.81	5.14	4.21	4.03	4.08	4.94	4.79	3.34	5.31	6.26	6.21	6.45	5.82	6.3	5.47	4.37	3.1	2.71	3.36	3.4	4.5	8.25	5.47	3.05	1.35	1.25	1.35	1.14	1.92	2.35	2.1	4.05	1.32	8.74	6.21	6.66	3	3.52	3.22	4.57	3.46	5.11	6.8
Vitvi10g04244	0	0.18	0	0	0	0	0	0.06	0	0	0.04	0	0	0.11	0.07	0	0	0	0	0	0.08	0.25	0	0.18	0	0	0	0	0	0	0.11	0	0	0	0	0	0	0	0	0.27	0.25	0.15	0	0.03	0	0	0	0	0
Vitvi10g04246	0.4	0	1.67	0.96	1.27	1.33	0.89	0.52	0.25	0.57	1.19	0.58	4.9	4.12	1.47	0.85	2.19	2.59	0	0.2	0.33	0	0.8	1.77	0	0.22	0	0	0	0.43	0	0	0.4	0.31	1.04	0	0	0	0.66	0	0	0	0	0.07	0	0.63	1.35	0.87	0.15
Vitvi10g04247	0	0	0	0	0	0	0	0	0	0	0.09	0	0	0	0	0	0	0	0	0	0	0	0	0	0	0	0	0	0	0	0	0	0	0	0	0	0	0	0	0	0	0	0	0	0	0	0	0	0
Vitvi10g04248	0	0	0	0	0	0	0	0	0	0	0	0	0	0	0	0	0	0	0	0	0	0	0	0	0	0	0	0	0	0	0	0	0	0	0	0	0	0	0	0	0	0	0	0	0	0	0	0	0
Vitvi10g04249	0	0	0	0	0	0	0	0	0	0	0	0	0	0	0	0	0	0	0	0	0	0	0	0	0	0	0	0	0	0	0	0	0	0	0	0	0	0	0	0	0	0	0	0	0	0	0	0	0
Vitvi10g04250	0	0	0	0	0	0	0	0	0	0	0	0	0	0	0	0	0	0	0	0	0	0	0	0	0	0	0	0	0	0	0	0	0	0	0	0	0	0	0	0	0	0	0	0	0	0	0	0	0
Vitvi10g04251	0	0	0	0	0	0	0	0	0	0	0	0	0	0	0	0	0	0	0	0	0	0	0	0	0	0	0	0	0	0	0	0	0	0	0	0	0	0	0	0	0	0	0	0	0	0	0	0	0
Vitvi10g04252	0	0	0	0	0	0	0	0	0	0	0	0	0	0	0	0	0	0	0	0	0	0	0	0	0	0	0	0	0	0	0	0	0	0	0	0	0	0	0	0	0	0	0	0	0	0	0	0	0
Vitvi10g04253	0	0	0	0	0	0	0	0	0	0	0	0	0	0	0	0	0	0	0	0	0	0	0	0	0	0	0	0	0	0	0	0	0	0	0	0	0	0	0	0	0	0	0	0	0	0	0	0	0
Vitvi10g04254	0	0	0	0	0	0	0	0	0	0	0.1	0	0	0	0	0	0	0	0	0	0	0	0	0	0	0	0	0	0	0	0	0	0	0	0	0	0	0	0	0	0	0	0	0	0	0	0	0	0
Vitvi10g04255	0	0	0	0	0	0	0	0	0	0	0	0	0	0	0	0	0	0	0	0	0	0	0	0	0	0	0	0	0	0	0	0	0	0	0	0	0	0	0	0	0	0	0	0	0	0	0	0	0
Vitvi10g04256	0.1	0.09	0	0.14	0	0	0.28	0	0	0	0	0	0.31	0	0.42	0.15	0	0	0	0	0	0	0	0	0	0	0.22	0	0	0	0	0	0	0	0	0	0	0	0	0	0	0	0	0	0	0	0	0	0
Vitvi10g04257	0.09	0	0.1	0	0.05	0	0.09	0.02	0.04	0	0.08	0.06	0	0	0.03	0	0.03	0.08	0.08	0	0	0.34	0.16	0.09	0.17	0	0.22	0	0.06	0.08	0.08	0.18	0.24	0.4	0.18	0.24	0.24	0	1.2	0.04	0.03	0.09	0.04	0.1	0	0.14	0.09	0.13	0.27
Vitvi10g04258	0.08	0.04	0.06	0.06	0	0	0.06	0.06	0.04	0.07	0.26	0.06	0.06	0.07	0.09	0.13	0.18	0.09	0.05	0.06	0	0.94	0.34	0.11	0	0.1	0.09	0	0	0.13	0.11	0.12	0.06	0.28	0.86	0.04	0.18	0.13	0.3	0.02	0.05	0.05	0.02	0.03	0.08	0.19	0.08	0.04	0.48
Vitvi10g04260	0	0	0	0	0	0	0	0	0	0	0	0	0	0	0	0	0	0	0	0	0	0	0	0	0	0.43	0	0	0	0.41	0	0.4	0.39	0	0	0.54	1.17	0	0	0	0	0	0	0.28	0.33	0	0.32	0	0
Vitvi10g04261	0	0	0	0	0	0	0	0	0	0	0	0	0	0	0	0	0	0	0	0	0	0	0	0	1.76	2.77	12.29	11.24	11.85	2.93	1.74	2.28	2.22	1.32	3.84	3.45	3.76	2.75	2.43	0	0	0	0	0	0	0	0	0	0
Vitvi10g04262	1.71	2.11	2.27	1.57	1.62	1.42	0.67	0.95	0.83	0.22	0.25	0.2	2.45	3.56	4.58	1.06	1.64	2	0.54	0.45	0.56	0.24	0.15	0.19	0.5	0.43	2.93	2.76	2.84	0.54	0.2	0.18	0.21	0.18	0.15	1.34	1.44	1.16	0.32	2.66	2.4	2.26	1.06	1.06	0.9	0.5	0.24	0.38	0.26
Vitvi10g04263	0	0	0	0	0	0	0	0	0	0	0	0	0	0	0	0	0	0	0	0	0	0	0	0	0	0	0	0	0	0.41	0	0	0	0.44	0	0.27	0	1.72	0.32	0.77	1.02	1.25	0.42	1.35	0.33	0.3	0	0.97	0.73
Vitvi10g04265	0.14	0.26	0.14	0	0	0	0	0	0	0	0.66	0.26	0	1.25	0	0.66	0.17	0	0	0	0	0.74	0.14	0.65	1.97	1.62	0.32	0	0.38	2.45	0.49	0.64	0	2.38	2.69	0.87	0.95	1.85	2.37	0	0.18	0	0	0	0	0	0.17	0	0.47
Vitvi10g04266	0	0	0	0	0	0	0	0	0	0	0	0	0	0	0	0	0	0	0	0	0	0	0	0	0	0	0	0	0	0.29	0	0	0	0	0	0	0	0	0.44	0	0	0	0	0	0	0	0	0	0
Vitvi10g04267	0.09	0.52	0.76	0.52	0.99	0.25	3.9	3.09	3.24	2.96	5.54	4.84	0.87	1.98	0.8	0.14	1.49	1.14	3.44	7.53	7.02	4.38	6.21	7.91	13.94	11.63	22.73	11.48	28.99	13.24	2.73	4.35	3.69	4.5	4.96	0.76	1.87	0	3.35	0.16	0.36	1	1.41	1.11	2.22	5.33	7.59	5.04	3.32
Vitvi10g04268	0	0	0	0	0	0	0.48	0.16	0.3	0	0	0	0	0	0	0	0	0.19	0.58	0	0.2	0	0	0.15	0	0	0	0	0	0	0	0	0	0	0	0	0	0	0	0.14	0	0.2	0	0	0	0.19	0	0	0
Vitvi10g04269	0.38	0.49	0.13	0	0.35	0.12	0.09	0.5	0.48	0.55	0.35	0.24	0.2	0.23	0	0.2	0	0	0	0	0	0.34	0.9	0.48	0	0	0	0	0	0	0.23	0	0	0.15	0	0.27	0	0	0.32	0.22	0	0	0.1	0	0	0.45	0	0.14	0.29
Vitvi10g04270	0	0	0	0	0	0	0	0	0	0.31	0	0	0	0	0	0	0	0	0	0	0	0	0	0	2.58	1.22	4.64	0	4	3.51	5.74	4.74	5.42	2.08	2.11	1.52	3.93	4.84	0.89	2.64	4.57	2.64	2.06	1.8	6.03	7.83	3.65	6.47	3.91
Vitvi10g04271	11.25	16	22.33	15.82	21.5	24.24	12.71	16.73	15.17	8.07	15.63	11.12	17.28	17.16	20.68	11.28	18.44	16.5	6.93	13.56	12.13	8.39	8.71	7.16	16.81	17.51	21.46	25.74	23.35	23.54	14.61	14.06	10.91	19.43	19.76	18.16	17.05	18.39	21.71	17.55	17.4	17.69	18.29	20.17	18.56	14.22	14.53	12.45	14.18
Vitvi10g04272	3.63	2.87	11.82	3.99	5.46	9.64	2.17	1.72	1.92	1.19	1.69	1.19	8.91	4.27	8.6	2.59	4.63	4.2	1.27	1.64	1.03	1	1.03	0.84	9.37	10.43	11.51	16.6	9.97	12.18	4.64	4.06	4.07	4.87	4.31	4.42	4.4	2.22	3.95	3.59	2.8	2.5	2.95	2.51	2.56	1.23	1.01	1.14	2.56
Vitvi10g04275	2.23	3.55	2.86	2.52	4.05	2.71	4.06	5.32	4.91	5.65	4.43	6	2.78	1.58	2.46	4.35	4.23	2.13	1.91	3.86	3.26	6.16	5.12	3.18	1.78	1.26	2.33	0	4.49	0.81	0.88	1.92	1.68	1.58	1.94	3.66	3.85	7.5	3.06	3.42	2.98	1.52	2.23	3.03	1.76	6.13	4.41	5	7.38
Vitvi10g04276	0.95	0.65	1.28	1.38	0.37	1.24	0	0.13	0	0	0	0	0.22	0.74	0.75	0	0.34	0	0	0	0	0	0	0	0.49	0.23	0	1.44	1.13	0	0	0	0	0	0	0	0	0	0	3.4	3.27	2.83	0.78	1.28	1.4	0.32	0	0	0
Vitvi10g04277	39.66	48.58	43.77	41.45	40.86	37.64	30.03	31.15	26.49	19.76	27.08	19.71	38.7	45.64	40.19	32.63	31.39	37.95	21.51	33.08	34.49	18.3	21.04	16.98	22.33	22.27	29.19	34.8	35.92	23.21	19.17	16.18	14.68	20.81	26.2	24.4	21.98	26.51	22.63	38.55	39.5	39.8	37.4	33.91	41.59	19.08	22.82	17.36	16.29
Vitvi10g04278	188.43	196.86	135.74	145.7	142.74	131.54	153.96	139.1	137.07	138.9	160.23	137.46	136.37	175.58	153.14	84.49	91.79	105.73	61.16	70.59	83.37	97.77	94.88	79.1	73.97	84.9	108.83	119.56	128.32	83.98	57.87	51.14	42.19	35.4	35.59	15.17	12.4	12.42	46.18	151.21	134.15	127.98	92.44	108.67	86.91	54.13	59.22	50.77	25.49
Vitvi11g01268	1403.49	1465.77	836.27	895.41	441.21	417.31	125.02	152.23	112.13	40.29	34.62	21.16	2083.23	3036.74	2341.36	1022.27	597.82	990.44	118.68	95.69	155.6	33.2	26.89	59.47	195.37	370.56	373.24	321.47	307.4	212	11.65	10.63	9.06	6.01	5.39	1.71	2.11	3.21	6.81	1301.34	1246.52	1215.19	345.11	245.17	157.86	22.92	12.25	20.35	12.46
Vitvi11g01266	95.39	1.45	21.4	1451.33	1345.33	968.96	443.46	215.76	287.59	25.58	12.78	1.6	1193.21	365.04	552.99	2016.78	1947.52	1456.22	303.47	346.15	93.83	2.65	7.37	4.17	1056.32	953.15	1.16	0.22	1.14	1653.15	18.56	13.05	15.54	2.18	5.46	3.46	2.41	1.93	3.45	0.57	0.77	0.45	24.93	0.18	0	0	0	0	0
Vitvi11g01243	467.27	474.24	293.87	523.52	455.57	348.25	729.94	619.01	569.8	167.65	131.51	118.25	266.31	335.89	232.44	260.5	270.25	276.93	554.31	555.73	513.1	121.24	106.65	102.66	317.66	252.83	100.46	84.74	103.73	194.98	185.88	194.68	218.05	189.23	191.11	48.03	51.35	47.49	204.25	291.38	250.35	205.91	206.59	255.84	213.47	391.82	340.77	317.85	94.12
Vitvi11g01257	39.68	88.2	99.06	48.11	37.66	67.06	15.68	12.18	19.46	6.51	6.96	4.25	56.82	33.86	49.56	25.57	18.68	17.75	11.28	5.44	3.09	6.59	3.75	1.68	54.11	50.3	465.74	483.47	453.01	53.74	27.37	23.14	30.02	130	122.61	69.67	69.76	80.51	166.01	98.33	79.83	58.92	7.21	6.09	6.45	3.72	3.45	2.94	9.26
Vitvi11g01657	79.27	41.13	522.77	115.17	89.89	297.33	29.37	17.73	20.31	0.52	0.67	0.66	239.35	104.8	234.64	17.6	29.63	28.59	1.07	3.57	0.94	0.4	0.3	0.21	13.99	11.93	60.27	54.36	43.28	12.57	1.46	0.47	0	1.56	0.59	1.43	1.04	1.26	1.3	0.39	0.5	0.46	2.27	0.83	0.68	0.35	0.19	0.74	0.69
Vitvi11g01295	13.34	13.08	11.12	4.48	1.88	4.5	0.69	0.64	0.62	0	0	0	14.75	14.52	12.41	6.61	20.55	14.19	28.57	24.82	42.73	0	0	8.68	0.24	0.67	254.78	281.99	278.12	0.11	0	0.2	0	0	0	0	0	0	0	30.27	18.13	5.72	1.67	0.88	1.87	0.39	0.25	0.22	0
Vitvi11g01298	223.46	344.45	231.38	181.39	221.26	229.35	214.72	177.2	165.74	54.65	63.57	53.5	155.3	284.16	252.29	41.91	93.41	111.33	43.71	105.04	130.47	55.67	57.94	54.07	136.14	144.66	177.46	166.3	190.76	151.01	51.39	49.53	49.68	53.89	55.73	76.83	70.77	75.89	64.45	400.16	408.45	396.02	191.96	199.59	166.89	78.6	71.45	69.54	33.85
Vitvi11g01300	196.74	204.95	205.63	245.91	247.3	237.46	388.49	360.63	375.86	243.93	192.5	185.77	194.02	212.67	205.44	261.87	210.26	220.39	329.05	268.18	326.49	179.1	167.46	142.4	135.42	123.4	158.85	192.7	165.64	127.99	206.64	183.94	168.99	119.02	131	163.12	154.88	184.41	130.73	197.88	198.23	201.17	138.15	156.49	172.26	283.08	279.77	264.17	142.12
Vitvi11g01309	96.77	94.24	72.02	70.01	50.1	58.11	49.92	29.56	41.79	31.66	35.88	26.35	76.91	88.65	72.62	80.75	53.44	79.25	55.1	56.27	66.84	33.15	25.25	27.76	61.21	59.03	50.83	33.75	47.17	44.67	26.81	27.02	34.35	31.62	28.46	42.43	44.89	36.24	38.16	100.23	94.15	77.45	53.35	65.95	49.94	77.3	65.6	75.38	38.42
Vitvi11g01259	307.63	293.36	185.36	143.87	155.32	164.22	102.09	71.28	72.59	18.36	17.04	7.87	325.8	382.37	336.71	140.38	129.34	166.15	68.38	65.55	73.37	17.03	15.94	10.01	42.77	47.34	104.17	82.25	83.7	52.19	8.76	7.92	6.34	2.29	3.55	4.17	5.97	4.71	2.85	330.32	326.2	360.11	267.05	251.58	240.88	45.47	45.08	46.18	13.2
Vitvi11g01236	177.71	195.16	134.22	127.13	131.79	108.37	125.3	137.48	120.8	122.32	139.71	111.1	157.13	211.64	183.85	130.18	121.88	140.6	121.41	125.14	126.39	181.92	146.02	158.86	216.43	247.27	332.93	358.49	340.47	242.05	209.78	213.91	213.33	320.2	310.67	223.45	216.49	206.86	320.97	290.87	310.55	287.92	196.21	191.46	198.58	139.37	125.68	119.65	166.39
Vitvi11g01650	5.7	6.98	7.07	22.53	24.53	8.61	101.54	113.71	129.02	222.53	244.48	244.14	13.15	16.22	13.47	72.85	77.91	71.98	205.38	192.86	214.06	256.25	259.75	213.97	18.98	12.79	2.83	1.71	2.87	13.78	92.63	101.03	97.46	81.35	69.7	55.3	52.38	54.13	78.82	15.04	14.96	12.46	18.53	22.85	22.97	114.78	135.07	127.17	55.92
Vitvi11g01244	94.58	74.68	72.29	92.59	85.51	64.15	117.1	113.22	103.75	105.28	81.28	80.97	90.95	89.43	84.19	114.16	78.01	84.68	133.49	99.42	99.33	99.36	84.83	85.34	63.9	63.7	63.18	62.9	64.81	56.5	76.91	73.03	80.11	86.02	76.15	57.64	62.24	60.17	82.83	85.13	76.36	68.52	65.21	80.47	67.16	91.07	76.59	85.52	74.38
Vitvi11g01271	118.97	93.13	99.28	117.43	110.14	110.08	108.91	104.47	104.14	126.58	113.81	116.22	85.96	82.6	78.81	89.2	69.26	75.88	85.03	69.45	74.05	125.19	111.17	93.88	100.34	109.59	82.95	85.82	82.8	108.65	106.11	102.08	99.67	133.23	135.14	167.79	159.03	149.75	145.83	117.24	131.64	108.07	151.55	181.49	152.61	152.73	123.43	134.26	287.22
Vitvi11g01676	6.62	8.27	6.45	0.41	0.99	2.51	6.83	17.64	19.71	49.39	135.43	74.69	10.68	52.08	21.36	9.41	7.47	9.51	11.03	6.25	5.77	52.07	40.03	20.54	37.22	33.57	41	49.79	33.44	58.42	32.33	34.31	24.34	23.52	23.11	17.82	19.35	14.27	42.75	4.61	2.54	3.61	0.53	0.83	1.1	1.95	3.85	2.21	3.7
Vitvi11g01202	13.63	11.08	15.82	20.45	19.84	18.34	20.73	20.19	20.88	23.79	22.08	21.96	16.54	13.19	14.35	29.63	18.54	18.64	23.56	19.92	19.45	23.3	20.74	22.54	29.14	28.59	17.79	18.62	16.16	25.87	33.49	33.47	33.53	46.56	50.61	92.26	97.62	100.25	45.78	8.53	8.72	9.28	9.11	8.09	9.4	21.62	22.8	21.76	51.38
Vitvi11g04344	77.44	75.72	83.77	61.71	85.28	74.85	78.02	77.13	71.68	74.09	81.4	67.72	85.88	93.68	79.48	58.04	61.13	72.51	52.65	82.95	88.81	82.12	75.14	97.44	67.17	70.9	89.87	92.82	94.29	72.26	87.81	77.8	62.78	97.26	126.97	121.8	112.22	143.63	100.85	92.13	121.68	109.32	129.51	136.86	123.98	130.6	109.13	110.67	153.21
Vitvi11g01680	4.49	5	4.9	0.4	0.19	1.53	1.5	1.5	2.07	5.25	14.86	7.19	1.12	17.5	4.92	0.67	0.35	0.16	0.62	0.57	0.44	7.59	5.94	0.63	11.37	12.21	9.17	11.61	6.6	22.78	8.97	8.22	6.37	7.99	8.87	6.99	8.46	5.39	12.06	0.6	0.7	0.81	0.23	0.25	0.31	0.7	1.99	0.68	1.68
Vitvi11g01220	54.4	43.99	39.36	51.95	44.66	36.51	50.46	47.8	43.6	61.02	60.39	62.5	45.75	49.91	46.62	58.54	44.32	49.94	56.06	47.69	47.6	85.7	67.38	57.29	35.09	30.69	29.94	31.72	27.69	30.01	48.5	44.66	43.17	69.55	72.16	106.82	100.37	100.04	69.7	32.36	32.72	28.73	32.64	41.02	36.64	34.15	31.92	33.5	55.43
Vitvi11g01662	70.81	81.96	72.42	62.51	49.84	61.14	63.82	65.78	68.56	43.23	54.37	42.85	49.11	61.57	58.12	62.24	56.03	66.36	67.05	72.69	65.04	48.83	43.65	35.14	46.71	58.69	81.68	75.46	78.63	62.38	33.86	38.32	35.12	45.77	41.16	53.16	51.44	52.02	48.43	68.68	63.55	79.68	67.34	68.38	67.57	46.98	51.73	52.3	42.96
Vitvi11g01272	65.46	59.04	59.72	63.57	58.82	54.52	50.81	50.45	48.93	56.67	56.5	51.41	79.12	80	76.38	94.79	72.02	78.55	67.53	62.81	56.56	68.6	53.18	51.94	51.73	51.44	64.07	61.64	68.85	60.17	49.48	43.24	45.81	67.51	65.98	91.61	86.28	95.34	72.18	58.5	59.69	53.35	41.72	44.31	42.13	37.91	41.1	36.62	76.88
Vitvi11g01651	63.58	73.97	60.62	60.06	60.15	50.51	53.16	56.37	49.68	40.19	53.57	40.27	52.87	69.71	65.74	83.46	68.79	80.05	56.22	62.86	84.14	44.4	48.28	44.26	76.25	65.79	58.95	56.36	56.98	62.63	32.78	37.04	30.31	29.33	37.07	32.48	39.27	40.97	26.65	71.4	74.78	95.55	132.51	95	142.58	47.51	52.72	54.45	54.79
Vitvi11g01301	76.84	106.63	107.3	71.19	90.16	86.71	95.44	108.43	99.88	50.13	95.74	80.4	61.53	91.24	84.45	37.71	64.74	63.44	48.32	75.2	87.02	47.2	59.63	59.41	58.46	62.86	100.84	96.21	102.94	54.52	68.51	57.12	51.45	90.1	92.82	73.84	65.87	84.88	89.6	137.87	129.1	132.57	125.31	125.26	121.35	81.22	100.64	90.33	71.33
Vitvi11g01211	83.16	89.29	89.98	76.72	76.89	88.67	96.14	94.24	87.31	45.32	61.72	54.73	81.93	82.52	79.37	64.24	66.24	68.18	56.93	75.27	73.47	50.37	55.28	48.27	77.4	78.89	109.96	113.16	115.61	77.64	62.69	60.34	55.97	53.71	57.24	68.58	59.14	68.65	56.25	133.72	126.23	112.37	100.3	97.06	104.43	84.12	93.95	65.59	62.37
Vitvi11g01212	79.17	95.4	66.44	79.93	72.64	60.8	117.37	110.64	102.22	122.6	128.29	98.89	71.55	99.69	81.57	89.59	85.32	81.1	130.61	118.72	115.06	124.87	89.91	89.37	46.86	51.17	83.42	80.36	88.64	53.37	49.8	45.46	41.15	63.05	65.33	85.9	72.99	88.32	79.62	95.12	95.75	78.71	86.67	98.66	99.32	79.89	78.82	64.34	54.53
Vitvi11g01282	58.78	60.57	52.74	49.99	51.34	47.83	56.53	55.61	49.59	52.7	57.32	50.3	65.03	73.9	69.56	60.65	59.37	66.45	43.98	51.14	49.66	82.37	57.64	52.43	45.09	43.3	47.18	53.1	48.66	44.18	46.33	42.55	42.07	70.26	79.96	122.68	107.78	121.4	86.06	35.93	42.17	31.32	40.34	49.94	47.13	51.95	39.31	32.55	61.17
Vitvi11g01242	40.07	40.99	42.81	33.21	41.59	39.06	40.2	42.7	41.12	31.77	42.54	37.3	46.37	55.13	49.15	32.99	37.09	43.7	31.11	46.04	46.87	44.94	44.91	46.55	33.5	37.74	47.27	50.45	46.45	39.62	40.08	40.07	32.87	48.49	44.45	66.12	60.03	70.03	51.02	44.74	48.67	58.55	48.35	48.82	45.08	43.94	48.48	52.12	60.05
Vitvi11g01668	0.59	0.19	0.83	0	0.4	0.09	1.32	2.7	2.43	3.49	5.78	4.48	1.43	1.81	1.42	1.58	2.88	0.91	0.59	1.91	2.85	3.32	3.59	1.41	0	0.17	0.46	0	0.28	0.32	0.35	0	0.15	0.34	0	0.21	0.11	0	0.98	0	0	0.36	0.08	0.11	0	0	0.5	0	0.11
Vitvi11g01675	1.91	1.65	1.53	0.56	0.55	0.59	1.94	6.47	6.36	22.4	46.29	25.8	5.95	24.9	14.75	4.22	2.86	2.46	5.68	2.5	1.34	55.02	44.06	9.97	6.73	9.07	3.96	4.05	2.35	13.45	3.06	2.79	1.85	1.64	1.65	0.65	0.93	0.64	3.5	0.96	0.56	0.75	0.03	0.34	0.15	1.31	2.39	1.25	1.84
Vitvi11g01263	1.81	1.66	1.65	0.18	0.53	0.83	1.72	5.4	9.72	19.04	44.24	29.05	3.04	10.99	4.41	1.18	1.25	1.14	0.98	0.55	0.72	24.93	17.18	5.49	13.6	11.51	8.04	7.63	5.4	17.97	16.31	17.03	12.14	15.13	17.93	5.74	5.36	4.72	28.54	0.43	0.33	0.51	0.34	0.25	0.37	1.21	3.09	2.48	4.58
Vitvi11g01683	0.15	0.56	0.3	0.07	0	0.04	0	0	0.27	0.33	2.36	1.13	1.4	10.51	2.51	0.62	0.31	0.44	0.4	0.43	0.24	4.62	2.88	1.01	1.21	3.85	1.93	2.05	1.35	5.9	0.6	0.75	0.73	0.22	0.19	1.23	1.06	1.46	0.96	0.04	0	0	0.08	0	0	0	0	0	0
Vitvi11g01692	33.77	32.84	28.4	19.21	26.81	22.96	25.75	24.91	27.88	6.73	8.67	6.46	44.12	65	56.69	29.1	39.64	51.68	20.61	34.41	37.53	19.96	24.14	15.99	25.52	25.74	36.27	32.24	35.62	28.49	12.77	13.4	11.25	3.79	4.82	2.76	3.42	1.64	3.93	15.11	12.99	15.9	6.59	5.26	7.44	4.62	4.53	4.53	1.12
Vitvi11g01230	38.25	41	38.72	34.34	36.72	35.87	29.49	32.28	28.88	29.88	38.38	34.36	28.59	43.93	35.54	37.2	37.25	38.79	39.05	41.72	38.01	43.12	35.83	35.98	40.28	49.75	78.83	74.27	78.83	44.85	32.54	29.99	29.09	49.47	44.33	69.16	61.68	65.86	53.27	80.14	83.34	71.27	43.42	50.29	41.36	22.38	21.67	20.01	29.7
Vitvi11g01677	0.54	0.8	0.7	0.06	0.06	0.31	0.25	1.1	2.37	6.52	14.24	7.13	4.56	21.07	11.12	1	0.69	0.82	0.65	0.75	0.79	8.26	6.33	1.55	2.4	3.75	8.84	9.07	8.04	7.28	3.19	2.92	1.58	0.63	0.33	0.35	0.14	1.13	1.03	0.18	0.06	0.15	0.03	0	0.05	0.15	0.9	0.18	0.72
Vitvi11g01208	43.05	43.2	26.9	38.13	33	30.22	56.83	55.32	46.19	18.2	16.28	8.41	31.74	27.6	28.28	82.14	68.35	73.98	88.92	64.54	70.97	12.72	22.04	20.24	11.8	9.68	11.74	13.9	11.02	8.94	2.79	2.83	2.37	2.58	2.32	1.37	1.2	0.39	3.1	15.72	15.44	12.42	9.04	9.14	10.01	9.53	9.49	8.21	2.62
Vitvi11g01239	32.92	31.43	28.18	35.94	30.88	23.76	30.03	32.81	29.61	35.69	27.82	24.42	37.02	36.43	32.53	36.23	27.97	24.63	41.88	30.97	30.36	28.67	26.08	26.01	39.32	39.09	32.97	32.67	39.34	37.12	24.94	23.69	27.67	22.56	26.32	26.37	24.89	28.88	28.56	30.45	29.52	23.11	24.66	26.92	23.97	19.23	17.92	15.53	13.38
Vitvi11g01663	66.96	78.36	65.47	53.27	46.25	46.32	56.69	59.95	51.96	39.63	40.83	42.36	45.08	51.36	41.3	59.16	37.26	44.47	66.37	58.99	51.95	37.32	35.84	28.09	51.7	57.89	35	30.89	32.22	39.16	26.86	27.02	30.23	31.45	31.28	37.99	29.92	26.07	36.54	40.57	42.12	33	54.68	39.24	52.62	41.86	41.52	39.31	49.59
Vitvi11g01656	6.22	7.27	12.27	5.47	4.97	6.82	5.24	6.14	5.99	4	5.62	5.37	5.34	8.6	8.11	8.02	2.23	3.25	4.77	5.88	5.27	5.74	6.59	4.78	54.51	60.17	19.33	16.95	20.84	42.51	21.52	24.48	30.83	31.78	22.15	24.13	32.55	21.98	41.01	23.12	22.45	18.39	24.45	28.93	26.11	30.43	23.8	25.86	32.26
Vitvi11g01265	0.89	0.64	1.31	0.39	0.58	0.37	0.66	2	0.76	0.96	2.64	0.65	1.21	0.98	1.62	1.64	2.09	2.15	0.58	0.2	0.67	0.42	0.31	1.61	1.44	1.36	1.89	2.12	1.12	1.23	1.98	1.11	0.54	9.55	6.29	3.2	2.98	0.9	7.72	1.08	0.48	0.76	0.15	0.15	0.35	3.26	2.1	2.68	1.99
Vitvi11g01294	0.37	1.03	0.44	0.53	0.77	0.5	0.41	0.85	0.45	0.97	1.95	0.79	1.51	1.44	1.77	1.8	0.46	1.02	0.93	1.21	3.15	7.47	5.61	1.82	0.09	0.04	0.12	0	0.29	0.13	0.47	0.45	0.36	1.03	0.92	1.61	2.26	0.88	0.97	0.2	0.35	0.22	0.13	0.06	0.14	0.19	0.1	0.2	0.09
Vitvi11g01290	2.1	2.39	2.51	1.18	1.39	1.02	1.17	1.84	1.22	1.45	3	1.06	2.31	3.68	4.15	4.19	2.22	3.54	2.55	3.55	4.52	9.29	8.04	3.25	0.24	0.11	0.51	0	0.55	0.43	0.66	0.61	0.56	0.94	0.43	2.45	2.82	2.43	1.41	3.2	3.31	3.73	1.74	1.68	2.01	1.6	1.45	1.84	1.46
Vitvi11g01201	0.34	0.5	1.19	1.46	2.83	1.64	1.04	0.77	0.89	0.92	2.35	1.78	1.66	0.78	1.55	0.68	0.42	0.88	0	0.41	0.27	1.39	1.35	0.43	3.06	2.38	5.8	6.29	4.17	3.37	2.98	2.27	1.98	8.72	8.01	1.67	1.23	0.72	5.05	1.32	1.1	0.9	0.35	0.22	0.24	0.47	0.74	0.8	0.98
Vitvi11g01674	0.38	1.08	1.67	0.3	0.06	0.46	0.87	1.92	3.31	6.76	14.39	7.41	0.94	3.89	2.26	0	0.05	0.29	0.35	0.12	0.16	8.25	4.76	0.52	3.29	2.62	2.65	3.98	1.98	4.69	8.52	8.62	5.36	9.57	10.8	3.26	1.78	1.41	16.11	0.18	0.06	0.2	0.24	0.12	0.05	0.64	1.81	0.36	1.63
Vitvi11g01205	20.53	24.73	19.52	19.93	20.89	20.17	35.69	37.48	34.55	16.1	18.52	12.6	21.69	25.28	24.62	23.88	17.91	22.94	29.41	30.68	33.82	14.65	15.98	15.45	16.12	15.78	19.43	16.59	15.71	14.81	8.56	8.68	8.45	6.37	5.5	6.44	6.67	7.09	6.56	28.11	30.24	29.64	17.56	17.23	19.62	24.53	25.21	19.69	11.01
Vitvi11g01277	41.25	39.43	45.68	33.72	35.94	39.86	32.04	31.86	32.51	26.16	29.32	28.37	31.03	29.52	31.57	24.26	18.64	24.63	16.62	17.54	15.49	25.2	23.12	21.31	24.84	31.05	30.67	29.05	26.1	28.01	27.43	27.5	28	28.75	29.99	35.66	35.24	34.57	30.98	32.1	30.64	29.8	30.45	32.07	31.01	27.36	24.11	26.29	37.49
Vitvi11g01682	4.38	3.53	9.2	0.19	0.15	1.88	0.38	0.71	0.49	1.11	3.28	1.11	0.34	2.74	1.61	0.27	0.05	0	0	0	0.16	0.87	0.48	0.24	1.69	2.25	7.46	7.49	4.67	4.05	0.69	1.13	0.52	0.65	0.67	0.63	0.74	0.29	0.96	0.45	0.52	0.11	0.14	0.05	0.06	0	0.33	0.09	0.2
Vitvi11g01232	15.46	18.71	19.71	12.21	15.63	17.59	14.08	15.17	14.31	13.87	18.82	18.35	14.21	14.92	15.5	11.74	14.41	13.24	11.14	12.15	13.12	13.91	14.2	11.16	9.55	12.04	13.51	11.53	13.5	13.39	9.08	9.12	11.06	15.31	11.86	35.59	30.91	36.26	17.59	14.38	14.34	14.98	13.96	13.38	12.23	13.13	12.51	15.57	17.28
Vitvi11g01260	30.2	32.3	30.74	24.91	27.77	29.2	24.44	24.38	21.13	17.98	23.81	21.17	34.31	34.35	31.92	29.45	28.17	32.06	18.27	24.89	24.49	27.67	27.11	25.28	22.41	24.75	32.56	34.86	35.39	25.41	18.84	20.43	17.15	23.74	26.92	40.38	36.23	37.34	26.89	30.73	30.86	33.03	33.23	35.53	35.66	18.72	20.5	19.86	23.49
Vitvi11g01233	33.54	39.42	34.19	27.64	31.21	29.78	29.56	31.23	29.07	14.13	21.31	18.45	21.75	27.13	26.89	19.34	18.69	21.39	17.64	19.31	19.86	13.51	15.12	11.61	16.29	19.25	33.31	29.15	34.86	17.2	10.18	10.61	10.07	14.18	15.03	12.52	13.17	12.36	13.71	37.95	35.51	40.71	37.52	31.37	32.7	21.08	22.5	22.03	16
Vitvi11g04342	5.5	4.88	26.22	24.16	24.26	40.29	3.8	3.15	4.56	0	0.18	0	24.09	13.24	21.33	10.07	20.22	15.57	0.32	2.79	0.17	0	0	0	8.18	7.04	16.4	10.65	14.97	9.17	0.24	0.21	0	0.47	1.05	0	0	0	0	1.51	1.08	0.16	0.99	0.3	0	0.16	0	0.15	0
Vitvi11g01297	17	20.97	15.14	16.36	19.25	15.87	18.4	21.11	20.2	11.17	13	9.62	14.69	19.43	15.51	14.48	12.33	12.63	15.39	12.37	14.24	12.2	9.86	12.06	28.97	29.39	32.93	39.87	34.79	28.44	22.58	23.5	19.35	17.27	18.54	14.64	13.19	12.38	17.59	20.47	21.87	19.65	18.01	20.09	22.77	15.53	14.76	13.89	13.03
Vitvi11g01238	9.62	11.7	9.68	7.76	7.73	7.13	9.06	9.19	7.29	4.86	5.02	4.54	9.23	11.81	10.36	7.32	7.54	7.85	9.38	9.85	8.62	8.17	7.06	5.72	9.21	9.49	25.05	24.36	25.51	8.16	10.33	9.77	9.14	9.89	10.83	6.66	5.37	5.61	9.84	27.8	26.89	25.31	21.79	22.62	24.77	13.33	13.58	13.53	6.96
Vitvi11g01231	0.32	0.56	0.17	0.1	0.32	0.17	0.12	0.13	0.21	0.74	0.3	0.04	0.62	1.61	1.65	1.73	2.58	0.78	3.63	5.52	3.01	0.03	0.07	3.25	1.46	0.42	2.87	0.6	3.72	0.74	0.6	0.28	0.34	0.24	0.35	0.38	0.34	0.08	0.22	2.62	2.06	1.58	0.07	0.08	0.09	0.19	0.2	0.17	0
Vitvi11g04366	19.45	36.36	25.27	25.76	22.6	19.07	23.98	28.12	19.48	12.8	18.54	16.46	12.01	16.09	12.19	5.88	10.15	9.81	9.99	12.51	16.47	8.66	11.41	9.75	12.73	14.02	18.53	16.69	20.89	11.76	15.63	15.31	10.52	19.02	19.06	17.21	13.62	16.37	19.18	8.29	10.73	14.17	13.46	23.76	16.63	10.85	16.88	9.76	8.59
Vitvi11g01228	6.67	7.07	8.49	5.4	6.78	6.36	3.06	3.15	2.67	1.03	1.07	0.44	7.27	7.47	7.01	2.93	2.13	1.94	1.06	1.25	1.43	0.53	0.8	0.35	1.6	1.09	12.46	6.56	10.92	1.86	0.66	0.54	0.64	0.57	0.49	0.42	0.46	0.5	0.61	7.45	8.03	8.32	3.31	2.45	2.82	1.34	0.91	0.89	0.09
Vitvi11g01667	0.3	0.09	0.42	0	0.2	0.27	0.15	0.19	0.37	0.34	0.61	0.12	0	1.26	0.22	0.47	0	0	0.59	0.29	0.12	0.27	0.1	0.19	1.06	0.67	0.46	1.57	0	0.64	0.18	0.46	0.75	1.03	0.39	1.88	1.14	0	2.44	0.26	0.13	0.36	0.32	0.05	0	0.82	0.63	0	2.72
Vitvi11g01303	0.5	0.91	0.53	2.59	1.36	0.96	3.7	3.98	3.89	4.12	5.07	2.35	0.78	0.61	0.96	0.4	0.82	0.34	13.29	12.22	15.04	12.88	11.64	12.2	4.53	5.93	12.31	17.53	15.57	6.88	3.02	4.26	3.6	3.27	2.6	1.6	0.98	0.58	3.94	0.48	0.34	0.44	0.19	0.36	0.39	1.95	1.44	2.05	1.1
Vitvi11g01199	14.45	17.18	15.4	17.85	12.35	12.73	14.65	12.49	11.08	14.3	15.61	12.07	15.15	15.73	14.71	18.74	15.1	16.94	14.5	13.32	12.02	21.08	17.5	13.22	10.21	9.48	14.2	9.63	13.86	10.67	15.08	12.72	9.9	18.83	15.09	20.3	18.65	17.52	18.58	14.34	13.12	15.1	20.21	21.46	19.19	10.12	10.18	10.66	13.4
Vitvi11g01214	16.51	17.82	14.52	13.06	17.73	12.98	19.74	17.43	18.5	21.99	24.54	21.59	17.73	19.71	18.18	23.33	24.4	23.1	25.52	30.6	30.72	21.52	21.2	26.05	11.15	10.79	17.56	14.81	19.38	10.11	14.7	13.46	12.51	13.88	14.22	19.49	18.23	21.44	13.61	17.32	15.69	13.84	17.23	18.79	18.57	20.73	24.58	20.82	16.65
Vitvi11g01209	17.52	17.02	17.73	13.69	14.95	16.03	8.65	10.47	10.42	9.69	12.83	11.46	12.19	12.23	11.71	13.34	13.02	15.75	8.4	11.71	14.97	11.88	15.68	10.49	9.8	11.34	19.01	22.39	15.98	11.24	9.13	9.73	9.3	9.99	9.87	26.8	28.32	25.06	11	16.43	16.07	17.79	16.72	15.23	16.6	9.72	8.11	10.65	18.06
Vitvi11g04368	0	0	0	0	0	0	0	0	0	0	0	0	3.82	7.54	6.28	9.23	5.11	4.74	6.21	9	9.88	7.15	9.17	10.9	1.32	0.93	2.16	1.94	1.02	0.45	0.98	0.85	0.97	1.17	1.8	2.52	2.22	3.4	1.36	0.08	0	0	0.08	0	0	0	0	0	0.11
Vitvi11g01702	7.31	6.92	6.83	5.78	7.2	4.96	3.2	4.44	2.76	0.7	0.89	0.77	11.45	11.42	9.32	12.71	15.22	12.59	8.2	9.3	9.46	0.87	2.3	4.79	6.12	11.68	6.87	8.16	7.92	4.23	4.76	5.93	5.64	12.79	10.18	5.83	8.14	3.55	11.45	8.28	7.5	6.27	6.52	6.87	8.7	4.02	5.06	4.7	4
Vitvi11g01293	0	0	0	0	0	0	0	0	0	0.17	0.08	0.03	0.71	0.29	0.27	0	0.1	0	0	0.24	0.05	0	0.04	0	0.29	0	0.85	0	0.34	0.13	0	0	0	0	0	0	0	0	0	0.1	0.16	0.44	0	0	0	0.05	0.05	0.04	0
Vitvi11g01684	0.29	0.37	0.35	0	0.1	0.09	0.29	0.14	0.59	0.25	1.09	0.48	0.62	7.73	3.61	0.31	0.24	0.11	0	0.14	0.12	0.97	0.87	0.32	0.35	1.14	1.13	0.76	0.67	1.25	0.6	0.52	0.22	0.33	0.57	0.41	0.33	0	0.71	0.12	0.06	0.06	0	0	0	0	0	0	0
Vitvi11g01235	0.65	1	0.47	0	0	0.09	0.04	0	0	0	0.07	0.06	0.64	0.09	0.11	0.87	0.19	0.11	0.12	0.15	0	0.27	0.1	0.47	1.07	0.84	0.7	2.37	1.11	1.86	0.26	0.23	0.3	0.58	0.58	4.82	4.52	2.84	0.98	2.7	2.99	2.37	0.57	0.44	0.51	0.47	0.32	0.05	1.37
Vitvi11g01693	9.65	9.56	7.68	8.57	7.6	10.45	6.22	4.04	4.86	0.34	0.27	0.02	9.34	9.36	10.43	4.28	6.82	7.56	2.63	2.71	3.16	0.03	0.11	0.3	3.73	2.91	3.85	2.62	4.35	3.89	0.14	0.12	0.04	0.06	0	0	0	0	0	15.42	18.57	18.71	15.05	13.71	15.92	3.83	3.28	3.24	0.09
Vitvi11g01203	9.23	8.08	7.09	9.88	9.49	7.77	10.25	8.21	9.06	7.89	7.48	6.46	8.25	10.03	8.9	11.94	7.05	7.66	7.81	6.5	7.34	8.86	7.47	5.63	5.51	5.91	7.62	9.19	9.69	6.21	6.3	6.58	5.83	9	10.82	18.83	18.7	23.6	8.82	6.76	6.98	6.75	5.8	7.55	6.87	6.03	5.92	4.73	8.45
Vitvi11g01273	7.56	9.16	10.35	5.94	6.67	7.19	5.31	5.71	4.59	2.9	3.12	2.34	6	8.66	7.98	4.46	5.05	6.63	3.97	3.91	3.95	2.97	2.35	1.76	6.27	6.49	7.2	6.66	8.71	5.53	3.49	3.01	2.71	2.18	1.93	1.31	1.33	1.07	2	12.87	12.31	11.48	10.75	11.62	10.49	5.64	4.56	4.82	3.58
Vitvi11g01213	5.54	6.07	5.98	6.81	5.68	6.61	6.82	5.96	6.19	5.93	9.96	7.52	4.55	7.08	5.08	5.33	6.43	6.83	5.17	7.47	7.71	11.94	8.66	7.58	3.19	4.46	7.19	6.47	6.51	4.65	5.13	5.01	4	7.53	7.77	12.76	12.81	11.98	10.09	3.41	2.66	3.45	4.33	4.77	4.36	4.37	4.72	4.74	4.34
Vitvi11g04359	4.27	5.94	5.07	3.9	5.41	4.02	2.87	2.76	3.38	2.26	2.94	3.47	11.71	11.08	12.02	8.58	9.95	10.68	6.63	8.09	8.55	5.19	7.1	6.68	3.71	2.57	2.59	5.47	7.69	3.14	2.32	3.21	2.19	2.87	4.59	5.38	4.29	4.18	3.92	15.01	16.7	16.04	11.46	15.11	12.1	6.82	6.66	6.85	5.45
Vitvi11g04335	2	4.12	5.33	4.01	1.78	3.08	3.2	1.95	2.03	2.51	2.96	3.29	3.2	1.12	1.53	0.74	2.72	1.23	2.19	2.06	1.15	2.48	3.88	1.17	3.86	2.6	7.22	8.94	6	4.75	3.82	3.58	1.86	5.51	3.61	12.97	10.44	11.89	9.12	5.84	3.91	4.33	3.27	4.19	3.57	1.99	1.56	4.7	4.05
Vitvi11g01671	4.72	4.1	5.62	5.31	2.14	5.41	0.54	0.47	0.77	0	0.23	0.06	3.32	1.5	3.35	3	0.85	1.55	0.17	0	0.18	0.13	0.1	0	2.94	3.26	0.91	0.25	0.67	3.37	0	0.07	0	0	0	0	0	0	0	0.54	0.45	0.71	4.93	3	4.11	0.51	0.06	0.05	0.11
Vitvi11g01240	12.16	12.53	11.56	11.36	9.77	10.19	9.48	10.07	9.64	8.01	8.49	8.39	7.37	9.07	7.97	5.7	6.89	7.25	4.23	6.72	5.89	5.96	5.73	5.21	8.72	8.78	11.49	13.65	10.79	9.6	6.21	4.97	4.93	5.82	5.52	8.98	7.9	8.23	6.56	10.56	10.42	10.06	12.25	14.3	11.87	7.46	6.33	7.09	6.82
Vitvi11g01255	0.04	0.04	0.04	0	0	0	0	0	0	0	0.16	0.09	0	0.07	0.21	0	0	0	0	0	0.09	0.05	0	0	0.27	0.45	0.53	0.8	0.63	0.37	0	0	0.06	0.04	0	0.08	0.13	0	0	0.03	0	0	0	0	0.05	0	0	0	0.04
Vitvi11g01261	0.63	0.47	0.7	2.54	3.98	1.72	1.61	1.3	0.89	0.21	0.34	0.42	3.47	0.57	1.35	4.63	3.01	2.61	1.58	1.72	1.4	1.22	1.06	1.3	0.5	1.18	0.41	1.29	0.29	0.74	0.25	0.16	0.16	0.28	0.27	0.52	0.64	0	0.17	0.09	0	0.09	0.06	0.04	0.05	0.16	0.18	0.04	0.28
Vitvi11g01691	4.82	5.39	2.9	2.17	2.43	1.78	1.11	0.56	0.98	0.4	0.47	0.65	4.23	6.5	5.2	2.93	2.91	2.9	0.14	0.85	0.43	0.15	1.16	1.31	0	0.19	0.54	0	0.96	0.56	0.61	0.18	0	0	0	0	0.13	0	0	0.99	0.92	0.99	0.85	0.7	1.19	0.14	0.15	0.13	0
Vitvi11g01267	1.08	1.12	5.53	3.13	1.68	3.51	0.84	0.43	0.16	0	0	0	5.03	8.49	5.02	0.83	1.08	1.02	0	0.08	0	0	0.02	0.05	0.37	0.59	2.37	3.04	1.7	0.77	0	0	0	0	0	0	0	0	0.09	0.14	0.12	0	0.06	0	0	0	0	0	0
Vitvi11g01224	0.47	0.55	8.3	2.66	3.25	4.61	0.43	0.66	0.81	0	0	0	2.56	1.34	4.88	0.79	2.19	1.59	0	0.23	0.07	0	0	0	0.66	0.84	0.43	0.14	0.29	1.19	0.51	0.81	0.59	0.18	0.31	0.06	0.03	0	0	0.14	0.04	0	0.04	0	0	0	0.03	0	0
Vitvi11g04355	0	0.36	0.2	0	0	0.09	0	0.55	0	0	0	0	0	0	0	0	0	0	0	0	0	0	0	0	0	0	0.22	1.49	0	0	0	0	0	0	0	0	0	0	0	5.99	7.41	7.47	0.38	0.1	0	0	0	0	0
Vitvi11g01658	0.07	0.19	0.27	0.19	0.11	0.57	0.05	0.03	0.06	0	0	0	0.16	0.06	0.25	0.05	0.46	0.38	0	0	0	0	0	0.03	0	0.11	1.15	0	0.91	0.11	0.17	0	0.15	0.26	0.51	0.83	1.36	1.65	0.49	0.34	0.13	0.28	0.03	0.02	0	0	0	0	0.07
Vitvi11g01210	0	0.07	0.04	2.09	1.2	0	3.51	3.85	3.83	0.67	0.86	0.39	0.06	0	0.09	0.19	0.25	0.81	3.15	3.25	4.54	0.1	0.35	0.89	0.14	0.2	0.18	0.41	0.11	0.32	0.14	0.12	0	0.18	0.15	0.25	0.31	0.39	0.29	0.03	0.16	0.05	0.19	0.17	0.15	1.93	1.64	1.49	0.22
Vitvi11g01200	0	0	0.15	0.05	0.05	0.03	0.16	0.03	0	0.12	0.17	0.11	0	0.07	0.04	0	0	0	0	0	0	0	0	0	0.13	0.3	0.34	0	0.5	0.23	0.32	0.33	0.05	1.2	1.12	0	0.12	0.24	0.62	0.12	0	0	0	0	0	0.04	0	0	0
Vitvi11g01285	0.57	1.03	0.57	1.11	1.16	0.54	0.73	0.49	0.39	0.21	0.23	0.08	2.38	1.8	2.08	1.78	0.91	1.28	0.34	0.23	0.6	0.29	0.53	0.6	0.71	0.7	0.82	1.04	1.1	1.21	0.43	0.1	0.23	0.05	0.09	0.18	0.1	0	0	1.78	2.11	1.71	1.09	1.7	1.55	0.52	0.47	0.43	0.3
Vitvi11g01310	0.21	0.16	0.04	0.06	0.01	0	0	0	0	0	0	0	0.76	0.86	0.45	0.26	0.03	0	0	0.03	0	0	0	0	0.07	0	0.63	0.11	0.52	0.1	0	0.03	0	0	0	0	0.02	0	0	1.56	1.02	1.01	0.07	0.01	0.05	0	0	0	0
Vitvi11g01307	0.61	0.62	0.29	0.24	0.18	0.17	0.08	0.13	0.03	0.13	0.08	0.08	0	0	0	0	0	0	0.07	0.05	0.05	0.05	0.02	0.02	0.53	0.44	1.73	1.17	1.95	0.9	0.33	0.26	0.45	0.36	0.22	0.16	0.11	0	0.64	1.45	1.51	1.47	0.14	0.07	0.05	0	0.02	0.06	0
Vitvi11g04356	0.31	1.19	1.86	0.13	0.03	0.2	0	0	0.04	0	0	0.03	3.69	0.73	0.78	0	0.06	0.2	0	0.07	0	0	0.04	0.04	0	0.07	3.02	2.11	1.73	0.07	0	0	0	0	0	0	0	0	0	0	0	0	0	0	0	0	0	0	0
Vitvi11g01681	0.24	0.54	0.2	0	0	0.22	0.18	0.09	0.22	0.12	0.36	0.3	0.15	0.43	0.26	0	0	0	0.22	0	0	0.06	0.05	0	0.17	0.32	0.22	0.25	0.13	0.08	0.25	0.07	0	0	0	0.1	0	0	0	0.04	0.06	0	0	0	0	0	0	0.05	0
Vitvi11g01283	0.07	0	0.66	0	0	0.06	0.05	0	0	0	0	0	0	0.06	0	0	0.09	0	0	0	0	0	0	0	0	0	0.08	0	0.29	0	0	0	0	0.16	0.14	1.77	0.93	2.35	0.17	0	0	0	0	0	0	0	0	0	0
Vitvi11g01685	0.07	0	0.28	0.19	0.14	0.06	0.05	0.06	0.06	0.17	0.14	0.42	0.21	0	0	0	0.08	0	0	0	0.08	0.09	0	0.13	0	0	0.16	0	0.37	0.11	0.24	0.1	0	0.38	0.26	0.42	0.54	0.22	0.49	0	0	0	0	0	0	0	0	0	0
Vitvi11g01222	0.12	0.1	0.21	0	0.02	0.09	0	0	0	0	0.03	0	0.32	1	0.66	0.08	0.28	0.83	0.18	0.52	0.19	0	0.18	0.05	0	0.08	0.12	0	0.21	0.04	0	0.04	0	0	0	0.05	0	0	0	0.3	0.23	0.21	0.14	0.14	0.13	0.03	0.03	0.03	0
Vitvi11g01287	0.3	0.17	0.21	0.04	0.02	0	0	0	0	0	0.02	0	0.28	0.59	0.68	0.04	0.12	0.14	0	0.04	0.06	0.03	0	0.07	0	0.04	0	0	0.07	0	0	0	0	0	0	0	0.03	0	0	0.13	0.03	0.06	0.08	0	0.03	0	0	0.03	0
Vitvi11g01241	0.22	0.27	0.61	0.17	0.16	0.35	0.13	0.16	0.19	0.21	0.29	0.35	0.16	0.33	0.35	0.48	0.41	0.18	0.21	0.51	0.2	0.27	0.28	0.3	1	0.58	0.52	0.95	0.33	0.33	0.35	0.34	0.24	0.39	0.39	0.42	0.48	0.2	0.25	0.4	0.21	0.22	0.28	0.34	0.52	0.16	0.15	0.24	0.16
Vitvi11g01286	0.31	0.43	0.12	0.48	0.41	0.17	0.37	0.23	0.16	0.04	0.1	0.15	0.31	0.48	0.39	0.04	0.45	0.57	0.14	0.35	0.18	0.06	0.22	0.11	0.94	1.37	0.84	2.01	1.19	1.16	0.42	0.48	0.4	0.19	0.19	0.15	0.14	0.4	0.24	0.37	0.41	0.29	0.19	0.33	0.8	0.14	0.15	0.21	0.14
Vitvi11g01258	0.24	0.27	0.02	0	0.03	0.16	0.11	0.02	0.04	0	0.07	0.04	0.28	0.75	0.59	0.24	0.19	0.27	0.18	0.03	0.08	0.03	0.13	0.06	0	0.07	0.15	0.23	0.12	0	0.08	0.03	0.06	0.12	0.08	0	0.1	0	0.37	0.22	0.32	0.16	0.11	0.02	0.17	0.1	0.03	0.09	0
Vitvi11g01652	0	0.06	0	0	0	0.03	0.02	0	0.12	0	0.11	0.21	0	0	0.04	0	0	0	0.19	0.1	0.04	0.09	0.07	0.22	0	0	0	0	0.09	0	0	0	0	0	0	0	0	0	0	0	0.04	0.08	0.03	0.04	0	0	0.17	0.14	0.07
Vitvi11g04352	0.18	0	0.1	0	0	0	0	0	0	0	0	0	0	0	0.1	0	0	0	0	0	0	0	0	0	0	0	0	0	0	0	0	0	0	0.11	0	0	0	0	0	0.08	0	0	0	0.05	0	0	0	0	0
Vitvi11g04341	0.19	0.06	0.53	0.82	1.71	0.46	0.09	0	0.12	0	0.22	0	1.2	0.57	0.9	0.4	0.87	0.43	0	0	0	0	0	0.06	0.67	0.21	0.15	0	0	0.2	0.11	0	0.09	0.22	0	0.26	0	0	0.15	0.16	0	0.15	0	0.1	0	0.07	0	0	0
Vitvi11g01694	0.04	0.09	0.05	0	0	0.04	0.1	0	0.04	0	0.09	0.03	0	0	0	0	0	0	0.21	0	0.06	0.12	0.05	0.09	0	0	0.11	0	0.12	0	0.08	0	0.07	0	0	0	0	0	0	0	0.18	0	0.04	0	0	0	0.11	0	0
Vitvi11g01281	0.01	0.05	0.01	0	0	0	0.01	0.01	0	0	0	0.01	0	0.05	0	0	0	0	0	0	0	0.02	0.01	0.01	0	0.02	0.09	0.07	0.07	0.06	0.23	0.08	0.1	0.89	1.12	0.38	0.39	0.31	0.84	0.04	0.07	0.06	0.02	0.02	0.08	0.03	0.02	0	0.55
Vitvi11g04338	0.2	0	0.41	0.57	0.54	0.36	0.29	0	0	0	0	0	0.31	0.36	1.3	0	0	1.58	0	0	0	0	0	0	0	0	0	0	0	0	0	0	0	0	0	0	0	0	0	0	0	0	0.16	0	0	0	0	0	0
Vitvi11g01664	0.09	0.09	0	0	0.04	0	0	0	0	0	0	0	0.19	0.5	0.17	0	0.08	0.17	0	0	0	0	0	0	0.11	0.05	0.21	0	0.68	0	0	0	0	0	0	0	0	0	0	0.03	0.08	0	0.02	0	0	0	0	0	0
Vitvi11g04354	0	0.05	0	0	0	0	0	0	0	0	0	0	0	0	0	0	0	0	0	0	0	0	0	0	0.18	0	0	0	0	0.04	0.09	0.04	0.04	0.06	0	0.16	0.06	0	0.06	0.26	0.3	0.18	0.02	0	0	0	0.06	0.05	0
Vitvi11g04340	0	0	0	0	0	0	0	0	0	0	0	0	0	0	0	0	0	0	0	0	0	0	0	0	0.59	0	0.39	0	0.46	0.13	0	0	0	0	0	0	0	0	0	0	0	0	0	0	0	0	0	0	0
Vitvi11g01227	0	0.02	0	0	0.05	0.02	0	0	0	0	0	0	0.04	0.14	0	0	0	0.03	0	0	0	0	0	0	0	0.35	0.97	0.55	0.43	0.17	0	0	0	0	0	0	0	0	0	0.07	0	0.03	0	0.01	0	0	0	0	0
Vitvi11g01250	0	0	0	0	0	0	0	0	0	0	0	0	0	0	0	0	0	0	0	0	0	0	0	0	0	0	0	0	0	0	0	0	0	0	0	0	0	0	0	0	0	0	0	0	0	0	0	0	0
Vitvi11g01665	0	0	0	0	0.03	0	0	0	0	0	0	0	0	0.22	0.09	0	0	0.18	0	0	0	0	0	0	0	0.13	0.74	0.21	0.22	0	0	0	0	0	0.15	0	0	0	0	0.03	0	0	0.03	0.02	0	0	0	0	0
Vitvi11g04350	0	0.16	0	0	0	0	0	0	0	0	0	0.1	0	0	0	0	0	0	0	0	0	0	0	0	0	0	0	0	0	0	0	0	0	0	0	0	0	0	0	0	0.44	0.6	0.27	0.18	0.21	0	0	0	0
Vitvi11g01687	0	0.03	0	0.02	0	0	0	0	0	0.01	0	0	0.04	0	0	0	0	0	0	0	0	0	0	0	0	0.02	0.03	0	0	0	0	0	0	0	0	0	0	0	0	0	0	0	0	0	0	0	0	0	0.02
Vitvi11g01308	0	0	0	0	0	0	0	0	0	0	0	0	0	0	0	0	0	0	0	0	0	0	0	0	0	0	0	0	0	0	0	0	0	0	0	0	0	0	0	0	0	0	0	0	0	0	0	0	0
Vitvi11g04333	0	0	0	0	0	0	0	0	0	0	0	0	0	0	0	0	0	0	0	0	0	0	0	0	0	0.3	0.14	0	0.16	0.38	0	0.27	0.18	0.27	0	0.12	0.2	0	0.29	0	0	0	0	0	0	0	0	0	0
Vitvi11g01673	0	0	0	0	0	0	0	0	0	0.1	0	0	0	0	0	0	0	0	0	0	0	0	0	0	0	0	0	0	0	0	0	0	0	0	0	0	0	0	0	0	0	0	0	0	0	0	0	0	0
Vitvi11g04334	0	0	0	0	0	0	0	0	0	0	0	0	0	0	0	0	0	0	0	0	0	0	0	0	0	0	0	0	0	0	0	0	0	0	0	0	0	0	0	0	0	0	0	0	0	0	0	0	0
Vitvi11g01686	0	0.01	0.01	0.02	0.02	0	0.02	0	0.03	0	0	0	0	0.03	0.02	0	0	0	0	0	0	0	0.01	0	0	0	0	0	0	0.02	0.02	0	0.04	0.02	0.05	0	0	0	0.03	0	0	0	0	0	0	0	0	0	0.02
Vitvi11g04337	0	0	0	0	0	0	0	0	0	0	0.14	0.07	0	0	0	0	0	0	0	0	0	0	0	0.1	0	0	0	0	0	0	0.19	0	0.32	0.24	0	0	0.24	0.35	0.26	0	0	0	0	0	0	0	0	0.11	0.24
Vitvi11g04332	0	0	0	0	0	0	0	0	0	0	0	0	0	0	0	0	0	0	0	0	0	0	0	0	0	0	0.24	0	0	0	0	0	0.16	0	0	0	0	0	0	0	0	0	0	0	0	0	0	0	0
Vitvi11g01269	0	0	0	0	0	0	0	0	0	0	0	0	0	0	0	0	0	0	0	0	0	0	0.1	0	0	0	0	0	0	0	0	0	0	0	0	0	0	0	0	0	0	0	0	0	0	0	0	0	0
Vitvi11g04346	0	0	0	0	0	0	0	0	0	0	0	0	0	0	0	0	0	0	0	0	0	0	0	0	0	0	0	0	0	0	0	0	0	0	0	0	0	0	0	0	0	0	0	0	0	0	0	0	0
Vitvi11g04339	0	0	0	0	0	0	0	0	0	0	0	0	0.12	0	0	0	0	0.26	0	0	0	0	0	0	0	0	0	0	0	0	0	0	0	0	0	0	0	0	0	0	0	0	0	0	0	0	0	0	0
Vitvi11g04347	0	0	0	0.08	0	0	0	0	0	0	0	0	0	0	0	0	0	0	0	0	0	0	0	0	0	0	0	0	0	0	0	0	0	0	0	0	0	0	0	0	0	0	0	0	0	0	0	0	0
Vitvi11g01279	0.08	0.04	0.08	0	0	0	0	0	0	0	0	0	0	0.15	0.09	0	0	0	0	0	0	0	0	0	0	0	0	0	0	0	0	0	0	0	0	0	0	0	0	0.07	0	0	0.03	0.04	0	0	0	0	0
Vitvi11g04364	0	0	0	0	0	0	0	0	0	0	0	0	0	0	0	0	0	0	0	0	0	0	0	0	0	0.18	0	0	0	0	0.19	0.17	0	0	0	0	0	0	0	0	0	0	0	0	0	0	0	0	0
Vitvi11g01688	0	0	0	0	0	0	0	0	0	0	0	0	0	0	0	0	0	0	0	0	0	0	0	0	0	0	0	0	0	0	0	0	0	0	0	0	0	0	0	0	0	0	0	0	0	0	0	0	0
Vitvi11g01284	0	0	0	0	0	0	0	0	0	0	0	0	0	0	0	0	0	0.05	0	0	0	0	0	0	0	0	0	0	0	0.07	0	0	0	0	0	0	0	0	0	0	0	0	0	0	0	0	0	0	0
Vitvi11g04345	0	0	0	0	0	0	0	0	0	0	0	0	0	0	0	0	0	0	0	0	0	0	0	0	0	0	0.04	0	0	0	0	0	0	0	0	0	0	0	0	0	0	0	0	0	0	0	0	0	0
Vitvi11g01291	0	0	0	0	0	0	0	0	0	0	0	0	0	0	0	0	0	0	0	0	0	0	0	0	0	0	0	0	0	0	0	0	0	0	0	0	0	0	0	0	0	0.04	0	0	0	0	0	0	0
Vitvi11g01311	0	0	0	0	0	0	0	0	0	0	0	0	0	0	0	0	0.13	0	0	0	0	0	0	0	0	0	0	0	0	0	0	0	0	0	0	0	0	0	0	0	0	0	0	0	0	0	0	0	0
Vitvi11g01251	0	0	0	0	0.01	0	0	0	0	0	0	0	0	0	0	0	0	0	0	0	0	0	0	0	0	0	0	0	0	0	0	0	0	0	0	0	0	0	0	0	0	0	0	0	0	0	0	0	0
Vitvi11g04367	0	0	0	0	0	0	0	0	0	0	0	0	0	0	0	0	0	0	0	0	0	0	0	0	0	0	0	0	0	0	0	0	0	0	0	0	0	0	0	0	0	0	0	0	0	0	0	0	0
Vitvi11g01253	0	0	0	0	0	0	0	0	0	0	0	0	0	0	0	0	0	0	0	0	0	0	0	0	0	0	0	0	0	0	0	0	0	0	0	0	0	0	0	0	0	0	0	0	0	0	0	0	0
Vitvi11g04348	0	0	0	0	0	0	0	0	0	0	0	0	0	0	0	0	0	0	0	0	0	0	0	0	0	0	0	0	0	0	0	0	0	0	0	0	0	0	0	0	0	0	0	0	0	0	0	0	0
Vitvi11g04351	0	0	0	0	0	0	0	0	0	0	0	0	0	0	0	0	0	0	0	0	0	0	0	0	0	0	0	0	0	0	0	0	0	0	0	0	0	0	0	0	0	0	0	0	0	0	0	0	0
Vitvi11g04363	0	0	0	0	0	0	0	0	0	0	0	0	0	0	0	0	0	0	0	0	0	0	0	0	0	0	0	0	0	0	0	0	0	0	0	0	0.08	0	0	0	0	0	0	0	0	0	0	0	0
Vitvi11g04353	0	0	0	0	0	0	0	0	0	0	0	0	0	0	0	0	0	0	0	0	0	0	0	0	0	0	0	0	0	0	0	0	0	0	0	0	0	0	0	0	0	0	0	0.05	0	0	0	0	0
Vitvi11g04362	0	0	0	0	0	0	0	0	0	0	0	0	0	0	0.04	0	0	0	0	0	0	0	0	0	0	0	0	0	0	0	0	0	0	0	0	0	0	0	0	0.03	0	0	0	0	0	0	0	0	0
Vitvi11g01296	0	0	0	0	0	0	0	0	0	0	0	0	0	0	0	0	0	0	0	0	0	0	0	0	0	0	0	0	0	0	0	0	0	0	0	0	0	0	0	0	0	0	0	0	0	0	0	0	0
Vitvi11g04349	0	0	0	0	0	0	0	0	0	0	0	0	0	0	0	0	0	0	0	0	0	0	0	0	0	0	0	0	0	0	0	0	0	0	0	0	0	0	0	0	0	0	0	0	0	0	0	0	0
Vitvi11g04360	0	0	0	0	0	0	0	0	0	0	0	0	0	0	0	0	0	0	0	0	0	0	0	0	0	0	0	0	0	0	0	0	0	0	0	0	0	0	0	0	0	0	0	0	0	0	0	0	0
Vitvi11g04361	0	0	0	0	0	0	0	0	0	0	0	0	0	0	0	0	0	0	0	0	0	0	0	0	0	0	0	0	0	0	0	0	0	0	0	0	0	0	0	0	0	0	0	0	0	0	0	0	0
[truncated: 70 more columns]

## Sheet: GREAT_samples_info
samples_filtered_table_CRIBI	BioProject	First_author	Paper	Private_public?	Sequencing_platform	PE_SE	Read_length_bp	Protocol_library	Stranded	Species	Variety	Organ	Tissue	Short stage	Stage_detail	Added_date	Exp. Type	Treatment?	Treatment_type	Treatment_nature	Treatment_detail	Comments	GREAT?	Quality_check	Complete bioprojet	Var.27
ERR5946177	PRJEB45016	Duchene	NA	Public	Illumina	PE	100	PolyA	reverse	Vitis vinifera	Riesling	Green berries	Whole	4.1Ã¯Â¿Â½?	Green berries - 4.1	2018-11	development	No	No	-	-	-	Yes
ERR5946178	PRJEB45016	Duchene	NA	Public	Illumina	PE	100	PolyA	reverse	Vitis vinifera	Riesling	Green berries	Whole	4.1Ã¯Â¿Â½?	Green berries - 4.1	2018-11	development	No	No	-	-	-	Yes
ERR5946179	PRJEB45016	Duchene	NA	Public	Illumina	PE	100	PolyA	reverse	Vitis vinifera	Riesling	Green berries	Whole	4.2Ã¯Â¿Â½?	Green berries - 4.2	2018-11	development	No	No	-	-	-	Yes
ERR5946180	PRJEB45016	Duchene	NA	Public	Illumina	PE	100	PolyA	reverse	Vitis vinifera	Riesling	Green berries	Whole	5.4Ã¯Â¿Â½?	Green berries the day of veraison - 5.4	2018-11	development	No	No	-	-	-	Yes
ERR5946181	PRJEB45016	Duchene	NA	Public	Illumina	PE	100	PolyA	reverse	Vitis vinifera	Riesling	Green berries	Whole	5.3Ã¯Â¿Â½?	Green berries the day of veraison - 5.3	2018-11	development	No	No	-	-	-	Yes
ERR5946182	PRJEB45016	Duchene	NA	Public	Illumina	PE	100	PolyA	reverse	Vitis vinifera	Riesling	Green berries	Whole	5.7Ã¯Â¿Â½?	Green berries the day of veraison - 5.7	2018-11	development	No	No	-	-	-	Yes
ERR5946183	PRJEB45016	Duchene	NA	Public	Illumina	PE	100	PolyA	reverse	Vitis vinifera	Riesling	Ripening berries	Whole	9.3Ã¯Â¿Â½?	Soft berries the day of veraison - 9.3	2018-11	development	No	No	-	-	-	Yes
ERR5946184	PRJEB45016	Duchene	NA	Public	Illumina	PE	100	PolyA	reverse	Vitis vinifera	Riesling	Ripening berries	Whole	8.3Ã¯Â¿Â½?	Soft berries the day of veraison - 8.3	2018-11	development	No	No	-	-	-	Yes
ERR5946185	PRJEB45016	Duchene	NA	Public	Illumina	PE	100	PolyA	reverse	Vitis vinifera	Riesling	Ripening berries	Whole	10.0Ã¯Â¿Â½?	Soft berries the day of veraison - 10.0	2018-11	development	No	No	-	-	-	Yes
ERR5946186	PRJEB45016	Duchene	NA	Public	Illumina	PE	100	PolyA	reverse	Vitis vinifera	Riesling	Ripening berries	Whole	15.0Ã¯Â¿Â½?	Mid-ripening berries - 15.0	2018-11	development	No	No	-	-	-	Yes
ERR5946187	PRJEB45016	Duchene	NA	Public	Illumina	PE	100	PolyA	reverse	Vitis vinifera	Riesling	Ripening berries	Whole	13.9Ã¯Â¿Â½?	Mid-ripening berries - 13.9	2018-11	development	No	No	-	-	-	Yes
ERR5946188	PRJEB45016	Duchene	NA	Public	Illumina	PE	100	PolyA	reverse	Vitis vinifera	Riesling	Ripening berries	Whole	15.7Ã¯Â¿Â½?	Mid-ripening berries - 15.7	2018-11	development	No	No	-	-	-	Yes
ERR5946189	PRJEB45016	Duchene	NA	Public	Illumina	PE	100	PolyA	reverse	Vitis vinifera	Gewuerztraminer	Green berries	Whole	4.3Ã¯Â¿Â½?	Green berries - 4.3	2018-11	development	No	No	-	-	-	Yes
ERR5946190	PRJEB45016	Duchene	NA	Public	Illumina	PE	100	PolyA	reverse	Vitis vinifera	Gewuerztraminer	Green berries	Whole	4.3Ã¯Â¿Â½?	Green berries - 4.3	2018-11	development	No	No	-	-	-	Yes
ERR5946191	PRJEB45016	Duchene	NA	Public	Illumina	PE	100	PolyA	reverse	Vitis vinifera	Gewuerztraminer	Green berries	Whole	4.2Ã¯Â¿Â½?	Green berries - 4.2	2018-11	development	No	No	-	-	-	Yes
ERR5946192	PRJEB45016	Duchene	NA	Public	Illumina	PE	100	PolyA	reverse	Vitis vinifera	Gewuerztraminer	Green berries	Whole	5.2Ã¯Â¿Â½?	Green berries the day of veraison - 5.2	2018-11	development	No	No	-	-	-	Yes
ERR5946193	PRJEB45016	Duchene	NA	Public	Illumina	PE	100	PolyA	reverse	Vitis vinifera	Gewuerztraminer	Green berries	Whole	5.2Ã¯Â¿Â½?	Green berries the day of veraison - 5.2	2018-11	development	No	No	-	-	-	Yes
ERR5946194	PRJEB45016	Duchene	NA	Public	Illumina	PE	100	PolyA	reverse	Vitis vinifera	Gewuerztraminer	Green berries	Whole	5.2Ã¯Â¿Â½?	Green berries the day of veraison - 5.2	2018-11	development	No	No	-	-	-	Yes
ERR5946195	PRJEB45016	Duchene	NA	Public	Illumina	PE	100	PolyA	reverse	Vitis vinifera	Gewuerztraminer	Ripening berries	Whole	8.5Ã¯Â¿Â½?	Soft berries the day of veraison - 8.5	2018-11	development	No	No	-	-	-	Yes
ERR5946196	PRJEB45016	Duchene	NA	Public	Illumina	PE	100	PolyA	reverse	Vitis vinifera	Gewuerztraminer	Ripening berries	Whole	9.2Ã¯Â¿Â½?	Soft berries the day of veraison - 9.2	2018-11	development	No	No	-	-	-	Yes
ERR5946197	PRJEB45016	Duchene	NA	Public	Illumina	PE	100	PolyA	reverse	Vitis vinifera	Gewuerztraminer	Ripening berries	Whole	8.4Ã¯Â¿Â½?	Soft berries the day of veraison - 8.4	2018-11	development	No	No	-	-	-	Yes
ERR5946198	PRJEB45016	Duchene	NA	Public	Illumina	PE	100	PolyA	reverse	Vitis vinifera	Gewuerztraminer	Ripening berries	Whole	14.6Ã¯Â¿Â½?	Mid-ripening berries - 14.6	2018-11	development	No	No	-	-	-	Yes
ERR5946199	PRJEB45016	Duchene	NA	Public	Illumina	PE	100	PolyA	reverse	Vitis vinifera	Gewuerztraminer	Ripening berries	Whole	16.0Ã¯Â¿Â½?	Mid-ripening berries - 16.0	2018-11	development	No	No	-	-	-	Yes
ERR5946200	PRJEB45016	Duchene	NA	Public	Illumina	PE	100	PolyA	reverse	Vitis vinifera	Gewuerztraminer	Ripening berries	Whole	16.2Ã¯Â¿Â½?	Mid-ripening berries - 16.2	2018-11	development	No	No	-	-	-	Yes
SRR1175771	PRJNA239278	Chai	https://pubmed.ncbi.nlm.nih.gov/25443848/	Public	Illumina	SE	49	PolyA	no	Vitis vinifera	Centennial Seedless	Green berries	Whole	12 DAF	12 days after flowering	2015	treatment	Control	No	-	-	200 berries randomly collected			yes
SRR1175773	PRJNA239278	Chai	https://pubmed.ncbi.nlm.nih.gov/25443848/	Public	Illumina	SE	49	PolyA	no	Vitis vinifera	Centennial Seedless	Green berries	Whole	12 DAF	12 days after flowering	2015	treatment	Control	No	-	-	200 berries randomly collected
SRR1175793	PRJNA239278	Chai	https://pubmed.ncbi.nlm.nih.gov/25443848/	Public	Illumina	SE	49	PolyA	no	Vitis vinifera	Centennial Seedless	Green berries	Whole	12 DAF	12 days after flowering	2015	treatment	Control	No	-	-	200 berries randomly collected
SRR11773404	PRJNA631791	He	-	Public	Illumina	PE	150	PolyA	no	Vitis vinifera	Cabernet Sauvignon	Green berries	Without seeds	E-L 34	E-L 34	2020-11	dev_treatment	Control	No	-	0.05% Tween 20 solution applied at E-L 33 stage (7 weeks after flowering)	GEO dataset GSE150343
SRR11773405	PRJNA631791	He	-	Public	Illumina	PE	150	PolyA	no	Vitis vinifera	Cabernet Sauvignon	Green berries	Without seeds	E-L 34	E-L 34	2020-11	dev_treatment	Control	No	-	0.05% Tween 20 solution applied at E-L 33 stage (7 weeks after flowering)	GEO dataset GSE150343
SRR11773406	PRJNA631791	He	-	Public	Illumina	PE	150	PolyA	no	Vitis vinifera	Cabernet Sauvignon	Green berries	Without seeds	E-L 34	E-L 34	2020-11	dev_treatment	Control	No	-	0.05% Tween 20 solution applied at E-L 33 stage (7 weeks after flowering)	GEO dataset GSE150343
SRR11773407	PRJNA631791	He	-	Public	Illumina	PE	150	PolyA	no	Vitis vinifera	Cabernet Sauvignon	Ripening berries	Without seeds	E-L 35	E-L 35	2020-11	dev_treatment	Control	No	-	0.05% Tween 20 solution applied at E-L 33 stage (7 weeks after flowering)	GEO dataset GSE150343
SRR11773408	PRJNA631791	He	-	Public	Illumina	PE	150	PolyA	no	Vitis vinifera	Cabernet Sauvignon	Ripening berries	Without seeds	E-L 35	E-L 35	2020-11	dev_treatment	Control	No	-	0.05% Tween 20 solution applied at E-L 33 stage (7 weeks after flowering)	GEO dataset GSE150343
SRR11773409	PRJNA631791	He	-	Public	Illumina	PE	150	PolyA	no	Vitis vinifera	Cabernet Sauvignon	Ripening berries	Without seeds	E-L 35	E-L 35	2020-11	dev_treatment	Control	No	-	0.05% Tween 20 solution applied at E-L 33 stage (7 weeks after flowering)	GEO dataset GSE150343
SRR11773410	PRJNA631791	He	-	Public	Illumina	PE	150	PolyA	no	Vitis vinifera	Cabernet Sauvignon	Ripening berries	Without seeds	E-L 36	E-L 36	2020-11	dev_treatment	Control	No	-	0.05% Tween 20 solution applied at E-L 33 stage (7 weeks after flowering)	GEO dataset GSE150343
SRR11773411	PRJNA631791	He	-	Public	Illumina	PE	150	PolyA	no	Vitis vinifera	Cabernet Sauvignon	Ripening berries	Without seeds	E-L 36	E-L 36	2020-11	dev_treatment	Control	No	-	0.05% Tween 20 solution applied at E-L 33 stage (7 weeks after flowering)	GEO dataset GSE150343
SRR11773412	PRJNA631791	He	-	Public	Illumina	PE	150	PolyA	no	Vitis vinifera	Cabernet Sauvignon	Ripening berries	Without seeds	E-L 36	E-L 36	2020-11	dev_treatment	Control	No	-	0.05% Tween 20 solution applied at E-L 33 stage (7 weeks after flowering)	GEO dataset GSE150343
SRR11773413	PRJNA631791	He	-	Public	Illumina	PE	150	PolyA	no	Vitis vinifera	Cabernet Sauvignon	Ripening berries	Without seeds	E-L 38	E-L 38	2020-11	dev_treatment	Control	No	-	0.05% Tween 20 solution applied at E-L 33 stage (7 weeks after flowering)	GEO dataset GSE150343
SRR11773414	PRJNA631791	He	-	Public	Illumina	PE	150	PolyA	no	Vitis vinifera	Cabernet Sauvignon	Ripening berries	Without seeds	E-L 38	E-L 38	2020-11	dev_treatment	Control	No	-	0.05% Tween 20 solution applied at E-L 33 stage (7 weeks after flowering)	GEO dataset GSE150343
SRR11773415	PRJNA631791	He	-	Public	Illumina	PE	150	PolyA	no	Vitis vinifera	Cabernet Sauvignon	Ripening berries	Without seeds	E-L 38	E-L 38	2020-11	dev_treatment	Control	No	-	0.05% Tween 20 solution applied at E-L 33 stage (7 weeks after flowering)	GEO dataset GSE150343
SRR3925774	PRJNA329357	Wang_W	https://pubmed.ncbi.nlm.nih.gov/28843071/	Public	Illumina	PE	150	PolyA	no	Vitis interspecific crossing	Shine Muscat	Green berries	Whole	110 days	early-maturity - 110 days	2021-02	treatment	Control	No	Water	Water	GEO dataset GSE84473			yes
SRR4425617	PRJNA348618	Savoi	https://www.ncbi.nlm.nih.gov/pmc/articles/PMC5502274/	Public	Illumina	SE	50	PolyA	no	Vitis vinifera	Merlot Noir	Green berries	Whole	53 DAF	53 DAA	2019-10	dev_treatment	Control	No	-	weekly irrigated (stem water potential maintained > -0.6MPa)	-			Yes
SRR4425618	PRJNA348618	Savoi	https://www.ncbi.nlm.nih.gov/pmc/articles/PMC5502274/	Public	Illumina	SE	50	PolyA	no	Vitis vinifera	Merlot Noir	Green berries	Whole	53 DAF	53 DAA	2019-10	dev_treatment	Control	No	-	weekly irrigated (stem water potential maintained > -0.6MPa)	-			Yes
SRR4425619	PRJNA348618	Savoi	https://www.ncbi.nlm.nih.gov/pmc/articles/PMC5502274/	Public	Illumina	SE	50	PolyA	no	Vitis vinifera	Merlot Noir	Green berries	Whole	26 DAF	26 DAA	2019-10	dev_treatment	Control	No	-	weekly irrigated (stem water potential maintained > -0.6MPa)	-			Yes
SRR4425620	PRJNA348618	Savoi	https://www.ncbi.nlm.nih.gov/pmc/articles/PMC5502274/	Public	Illumina	SE	50	PolyA	no	Vitis vinifera	Merlot Noir	Green berries	Whole	26 DAF	26 DAA	2019-10	dev_treatment	Control	No	-	weekly irrigated (stem water potential maintained > -0.6MPa)	-			Yes
SRR4425622	PRJNA348618	Savoi	https://www.ncbi.nlm.nih.gov/pmc/articles/PMC5502274/	Public	Illumina	SE	50	PolyA	no	Vitis vinifera	Merlot Noir	Green berries	Whole	26 DAF	26 DAA	2019-10	dev_treatment	Control	No	-	weekly irrigated (stem water potential maintained > -0.6MPa)	-			Yes
SRR4425624	PRJNA348618	Savoi	https://www.ncbi.nlm.nih.gov/pmc/articles/PMC5502274/	Public	Illumina	SE	50	PolyA	no	Vitis vinifera	Merlot Noir	Green berries	Whole	53 DAF	53 DAA	2019-10	dev_treatment	Control	No	-	weekly irrigated (stem water potential maintained > -0.6MPa)	-			Yes
SRR4425626	PRJNA348618	Savoi	https://www.ncbi.nlm.nih.gov/pmc/articles/PMC5502274/	Public	Illumina	SE	50	PolyA	no	Vitis vinifera	Merlot Noir	Ripening berries	Whole	67 DAF	67 DAA	2019-10	dev_treatment	Control	No	-	weekly irrigated (stem water potential maintained > -0.6MPa)	-			Yes
SRR4425631	PRJNA348618	Savoi	https://www.ncbi.nlm.nih.gov/pmc/articles/PMC5502274/	Public	Illumina	SE	50	PolyA	no	Vitis vinifera	Merlot Noir	Ripening berries	Whole	67 DAF	67 DAA	2019-10	dev_treatment	Control	No	-	weekly irrigated (stem water potential maintained > -0.6MPa)	-			Yes
SRR4425632	PRJNA348618	Savoi	https://www.ncbi.nlm.nih.gov/pmc/articles/PMC5502274/	Public	Illumina	SE	50	PolyA	no	Vitis vinifera	Merlot Noir	Ripening berries	Whole	67 DAF	67 DAA	2019-10	dev_treatment	Control	No	-	weekly irrigated (stem water potential maintained > -0.6MPa)	-			Yes
SRR4425633	PRJNA348618	Savoi	https://www.ncbi.nlm.nih.gov/pmc/articles/PMC5502274/	Public	Illumina	SE	50	PolyA	no	Vitis vinifera	Merlot Noir	Ripening berries	Whole	81 DAF	81 DAA	2019-10	dev_treatment	Control	No	-	weekly irrigated (stem water potential maintained > -0.6MPa)	-			Yes
SRR4425634	PRJNA348618	Savoi	https://www.ncbi.nlm.nih.gov/pmc/articles/PMC5502274/	Public	Illumina	SE	50	PolyA	no	Vitis vinifera	Merlot Noir	Ripening berries	Whole	81 DAF	81 DAA	2019-10	dev_treatment	Control	No	-	weekly irrigated (stem water potential maintained > -0.6MPa)	-			Yes
SRR4425637	PRJNA348618	Savoi	https://www.ncbi.nlm.nih.gov/pmc/articles/PMC5502274/	Public	Illumina	SE	50	PolyA	no	Vitis vinifera	Merlot Noir	Ripening berries	Whole	106 DAF	106 DAA	2019-10	dev_treatment	Control	No	-	weekly irrigated (stem water potential maintained > -0.6MPa)	-			Yes
SRR4425638	PRJNA348618	Savoi	https://www.ncbi.nlm.nih.gov/pmc/articles/PMC5502274/	Public	Illumina	SE	50	PolyA	no	Vitis vinifera	Merlot Noir	Ripening berries	Whole	106 DAF	106 DAA	2019-10	dev_treatment	Control	No	-	weekly irrigated (stem water potential maintained > -0.6MPa)	-			Yes
SRR4425639	PRJNA348618	Savoi	https://www.ncbi.nlm.nih.gov/pmc/articles/PMC5502274/	Public	Illumina	SE	50	PolyA	no	Vitis vinifera	Merlot Noir	Ripening berries	Whole	106 DAF	106 DAA	2019-10	dev_treatment	Control	No	-	weekly irrigated (stem water potential maintained > -0.6MPa)	-			Yes
SRR4425641	PRJNA348618	Savoi	https://www.ncbi.nlm.nih.gov/pmc/articles/PMC5502274/	Public	Illumina	SE	50	PolyA	no	Vitis vinifera	Merlot Noir	Ripening berries	Whole	81 DAF	81 DAA	2019-10	dev_treatment	Control	No	-	weekly irrigated (stem water potential maintained > -0.6MPa)	-			Yes
SRR5534893	PRJNA386484	du_Plessis	https://www.ncbi.nlm.nih.gov/pmc/articles/PMC5518647/	Public	Illumina	PE	101	PolyA	no	Vitis vinifera	Sauvignon Blanc	Green berries	Without seeds	E-L 31	E-L 31 (pea-sized)	2019-10	dev_treatment	Control	No	Shaded	Adjacent to an exposed zone	GEO dataset GSE98873			Yes
SRR5534894	PRJNA386484	du_Plessis	https://www.ncbi.nlm.nih.gov/pmc/articles/PMC5518647/	Public	Illumina	PE	101	PolyA	no	Vitis vinifera	Sauvignon Blanc	Green berries	Without seeds	E-L 31	E-L 31 (pea-sized)	2019-10	dev_treatment	Control	No	Shaded	Adjacent to an exposed zone	GEO dataset GSE98873			Yes
SRR5534895	PRJNA386484	du_Plessis	https://www.ncbi.nlm.nih.gov/pmc/articles/PMC5518647/	Public	Illumina	PE	101	PolyA	no	Vitis vinifera	Sauvignon Blanc	Green berries	Without seeds	E-L 31	E-L 31 (pea-sized)	2019-10	dev_treatment	Control	No	Shaded	Adjacent to an exposed zone	GEO dataset GSE98873			Yes
SRR5534899	PRJNA386484	du_Plessis	https://www.ncbi.nlm.nih.gov/pmc/articles/PMC5518647/	Public	Illumina	PE	101	PolyA	no	Vitis vinifera	Sauvignon Blanc	Green berries	Without seeds	E-L 33	E-L 33 (pre-vra	2019-10	dev_treatment	Control	No	Shaded	Adjacent to an exposed zone	GEO dataset GSE98873			Yes
SRR5534900	PRJNA386484	du_Plessis	https://www.ncbi.nlm.nih.gov/pmc/articles/PMC5518647/	Public	Illumina	PE	101	PolyA	no	Vitis vinifera	Sauvignon Blanc	Green berries	Without seeds	E-L 33	E-L 33 (pre-vra	2019-10	dev_treatment	Control	No	Shaded	Adjacent to an exposed zone	GEO dataset GSE98873			Yes
SRR5534901	PRJNA386484	du_Plessis	https://www.ncbi.nlm.nih.gov/pmc/articles/PMC5518647/	Public	Illumina	PE	101	PolyA	no	Vitis vinifera	Sauvignon Blanc	Green berries	Without seeds	E-L 33	E-L 33 (pre-vra	2019-10	dev_treatment	Control	No	Shaded	Adjacent to an exposed zone	GEO dataset GSE98873			Yes
SRR5534905	PRJNA386484	du_Plessis	https://www.ncbi.nlm.nih.gov/pmc/articles/PMC5518647/	Public	Illumina	PE	101	PolyA	no	Vitis vinifera	Sauvignon Blanc	Green berries	Without seeds	E-L 34	E-L 34 (vra	2019-10	dev_treatment	Control	No	Shaded	Adjacent to an exposed zone	GEO dataset GSE98873			Yes
SRR5534906	PRJNA386484	du_Plessis	https://www.ncbi.nlm.nih.gov/pmc/articles/PMC5518647/	Public	Illumina	PE	101	PolyA	no	Vitis vinifera	Sauvignon Blanc	Green berries	Without seeds	E-L 34	E-L 34 (vra	2019-10	dev_treatment	Control	No	Shaded	Adjacent to an exposed zone	GEO dataset GSE98873			Yes
SRR5534907	PRJNA386484	du_Plessis	https://www.ncbi.nlm.nih.gov/pmc/articles/PMC5518647/	Public	Illumina	PE	101	PolyA	no	Vitis vinifera	Sauvignon Blanc	Green berries	Without seeds	E-L 34	E-L 34 (vra	2019-10	dev_treatment	Control	No	Shaded	Adjacent to an exposed zone	GEO dataset GSE98873			Yes
SRR5534911	PRJNA386484	du_Plessis	https://www.ncbi.nlm.nih.gov/pmc/articles/PMC5518647/	Public	Illumina	PE	101	PolyA	no	Vitis vinifera	Sauvignon Blanc	Ripening berries	Without seeds	E-L 38	E-L 38 (ripe-stage - commercial harvest date)	2019-10	dev_treatment	Control	No	Shaded	Adjacent to an exposed zone	GEO dataset GSE98873			Yes
SRR5534912	PRJNA386484	du_Plessis	https://www.ncbi.nlm.nih.gov/pmc/articles/PMC5518647/	Public	Illumina	PE	101	PolyA	no	Vitis vinifera	Sauvignon Blanc	Ripening berries	Without seeds	E-L 38	E-L 38 (ripe-stage - commercial harvest date)	2019-10	dev_treatment	Control	No	Shaded	Adjacent to an exposed zone	GEO dataset GSE98873			Yes
SRR5557215	PRJNA386228	Maoz	https://pubmed.ncbi.nlm.nih.gov/30814549/	Public	Illumina	SE	61	PolyA	no	Vitis vinifera	Superior Seedless	Ripening berries	Whole	Maturity	Maturity	2021-02	treatment	Control	No	-	No storage	-			yes
SRR5557216	PRJNA386228	Maoz	https://pubmed.ncbi.nlm.nih.gov/30814549/	Public	Illumina	SE	61	PolyA	no	Vitis vinifera	Superior Seedless	Ripening berries	Whole	Maturity	Maturity	2021-02	treatment	Control	No	-	No storage	-			yes
SRR5557217	PRJNA386228	Maoz	https://pubmed.ncbi.nlm.nih.gov/30814549/	Public	Illumina	SE	61	PolyA	no	Vitis vinifera	Superior Seedless	Ripening berries	Whole	Maturity	Maturity	2021-02	treatment	Control	No	-	No storage	-			yes
SRR5884533	PRJNA396459	Xu	https://www.ncbi.nlm.nih.gov/pmc/articles/PMC5563355/	Public	Illumina	SE	49	PolyA	no	Vitis interspecific crossing	Moldova	Ripening berries	Whole	-	Veraison (from 9 Brix to treatm	2019-11	treatment	Control	No	TritonX-100	0,05% solution for the whole grape cluster	Interspecific -			Yes
SRR5884534	PRJNA396459	Xu	https://www.ncbi.nlm.nih.gov/pmc/articles/PMC5563355/	Public	Illumina	SE	49	PolyA	no	Vitis interspecific crossing	Moldova	Ripening berries	Whole	-	Veraison (from 9 Brix to treatm	2019-11	treatment	Control	No	TritonX-100	0,05% solution for the whole grape cluster	Interspecific -			Yes
SRR5884536	PRJNA396459	Xu	https://www.ncbi.nlm.nih.gov/pmc/articles/PMC5563355/	Public	Illumina	SE	49	PolyA	no	Vitis interspecific crossing	Moldova	Ripening berries	Whole	-	Veraison (from 9 Brix to treatm	2019-11	treatment	Control	No	TritonX-100	0,05% solution for the whole grape cluster	Interspecific -			Yes
SRR6189707	PRJNA414966	Sonego	-	Public	Illumina	SE	101	Random	no	Vitis vinifera	Pinot Noir	Green berries	Exocarp + mesocarp	BBCH 78	Hard green berries (33/34 E-L)	2019-11	dev_treatment	Control	No	Distilled water	4 weeks post-inoculation	Exocarp (PO:0009085) and mesocarp (PO_0009087)			No
SRR6189708	PRJNA414966	Sonego	-	Public	Illumina	SE	101	Random	no	Vitis vinifera	Pinot Noir	Ripening berries	Exocarp + mesocarp	BBCH 89	Ripe berries (38 E-L)	2019-11	dev_treatment	Control	No	Distilled water	12 weeks post-inoculation	Exocarp (PO:0009085) and mesocarp (PO_0009087)			No
SRR6189710	PRJNA414966	Sonego	-	Public	Illumina	SE	101	Random	no	Vitis vinifera	Pinot Noir	Green berries	Exocarp + mesocarp	BBCH 78	Hard green berries (33/34 E-L)	2019-11	dev_treatment	Control	No	Distilled water	4 weeks post-inoculation	Exocarp (PO:0009085) and mesocarp (PO_0009087)			No
SRR6189714	PRJNA414966	Sonego	-	Public	Illumina	SE	101	Random	no	Vitis vinifera	Pinot Noir	Ripening berries	Exocarp + mesocarp	BBCH 89	Ripe berries (38 E-L)	2019-11	dev_treatment	Control	No	Distilled water	12 weeks post-inoculation	Exocarp (PO:0009085) and mesocarp (PO_0009087)			No
SRR6189718	PRJNA414966	Sonego	-	Public	Illumina	SE	101	Random	no	Vitis vinifera	Pinot Noir	Ripening berries	Exocarp + mesocarp	BBCH 89	Ripe berries (38 E-L)	2019-11	dev_treatment	Control	No	Distilled water	12 weeks post-inoculation	Exocarp (PO:0009085) and mesocarp (PO_0009087)			No
SRR7430372	PRJNA477951	Lovato	https://pubmed.ncbi.nlm.nih.gov/31304217/	Public	Illumina	PE	101	PolyA	no	Vitis vinifera	Garganega	Ripening berries	Without seeds	26.6Ã¯Â¿Â½?	26.6	2020-10	treatment	Control	No	Sterile water	-	GEO dataset GSE116274
SRR7430373	PRJNA477951	Lovato	https://pubmed.ncbi.nlm.nih.gov/31304217/	Public	Illumina	PE	101	PolyA	no	Vitis vinifera	Garganega	Ripening berries	Without seeds	26.6Ã¯Â¿Â½?	26.6	2020-10	treatment	Control	No	Sterile water	-	GEO dataset GSE116274
SRR7430374	PRJNA477951	Lovato	https://pubmed.ncbi.nlm.nih.gov/31304217/	Public	Illumina	PE	101	PolyA	no	Vitis vinifera	Garganega	Ripening berries	Without seeds	26.6Ã¯Â¿Â½?	26.6	2020-10	treatment	Control	No	Sterile water	-	GEO dataset GSE116274
SRR8034265	PRJNA495848	He	https://pubmed.ncbi.nlm.nih.gov/32019505/	Public	Illumina	SE	49	PolyA	no	Vitis vinifera	Cabernet Sauvignon	Ripening berries	Without seeds	BBCH 83	E-L 36	2019-12	dev_treatment	Control	No	-	-	GEO dataset GSE121146
SRR8034266	PRJNA495848	He	https://pubmed.ncbi.nlm.nih.gov/32019505/	Public	Illumina	SE	49	PolyA	no	Vitis vinifera	Cabernet Sauvignon	Ripening berries	Without seeds	BBCH 83	E-L 36	2019-12	dev_treatment	Control	No	-	-	GEO dataset GSE121146
SRR8034267	PRJNA495848	He	https://pubmed.ncbi.nlm.nih.gov/32019505/	Public	Illumina	SE	49	PolyA	no	Vitis vinifera	Cabernet Sauvignon	Ripening berries	Without seeds	BBCH 83	E-L 36	2019-12	dev_treatment	Control	No	-	-	GEO dataset GSE121146
SRR8034268	PRJNA495848	He	https://pubmed.ncbi.nlm.nih.gov/32019505/	Public	Illumina	SE	49	PolyA	no	Vitis vinifera	Cabernet Sauvignon	Ripening berries	Without seeds	BBCH 85	E-L 37	2019-12	dev_treatment	Control	No	-	-	GEO dataset GSE121146
SRR8034269	PRJNA495848	He	https://pubmed.ncbi.nlm.nih.gov/32019505/	Public	Illumina	SE	49	PolyA	no	Vitis vinifera	Cabernet Sauvignon	Ripening berries	Without seeds	BBCH 85	E-L 37	2019-12	dev_treatment	Control	No	-	-	GEO dataset GSE121146
SRR8034270	PRJNA495848	He	https://pubmed.ncbi.nlm.nih.gov/32019505/	Public	Illumina	SE	49	PolyA	no	Vitis vinifera	Cabernet Sauvignon	Ripening berries	Without seeds	BBCH 85	E-L 37	2019-12	dev_treatment	Control	No	-	-	GEO dataset GSE121146
SRR8034271	PRJNA495848	He	https://pubmed.ncbi.nlm.nih.gov/32019505/	Public	Illumina	SE	49	PolyA	no	Vitis vinifera	Cabernet Sauvignon	Ripening berries	Without seeds	BBCH 89	E-L 38	2019-12	dev_treatment	Control	No	-	-	GEO dataset GSE121146
SRR8034272	PRJNA495848	He	https://pubmed.ncbi.nlm.nih.gov/32019505/	Public	Illumina	SE	49	PolyA	no	Vitis vinifera	Cabernet Sauvignon	Ripening berries	Without seeds	BBCH 89	E-L 38	2019-12	dev_treatment	Control	No	-	-	GEO dataset GSE121146
SRR8034273	PRJNA495848	He	https://pubmed.ncbi.nlm.nih.gov/32019505/	Public	Illumina	SE	49	PolyA	no	Vitis vinifera	Cabernet Sauvignon	Ripening berries	Without seeds	BBCH 89	E-L 38	2019-12	dev_treatment	Control	No	-	-	GEO dataset GSE121146
SRR8732032	PRJNA527184	Sun_L	https://pubmed.ncbi.nlm.nih.gov/31838251/	Public	BGISEQ	PE	50	Random	no	Vitis vinifera	Red Globe	Ripening berries	Skin	120 DAF	Fruit ripening period (120 DAF)	2020-10	treatment	Control	No	-	-	15 berries collected from 3 to 5 control clusters
SRR8732033	PRJNA527184	Sun_L	https://pubmed.ncbi.nlm.nih.gov/31838251/	Public	BGISEQ	PE	50	Random	no	Vitis vinifera	Red Globe	Ripening berries	Skin	120 DAF	Fruit ripening period (120 DAF)	2020-10	treatment	Control	No	-	-	15 berries collected from 3 to 5 control clusters
SRR8732036	PRJNA527184	Sun_L	https://pubmed.ncbi.nlm.nih.gov/31838251/	Public	BGISEQ	PE	50	Random	no	Vitis vinifera	Red Globe	Ripening berries	Skin	100 DAF	Before fruit ripening period (100 DAF)	2020-10	treatment	Control	No	-	-	15 berries collected from 3 to 5 control clusters
SRR8732038	PRJNA527184	Sun_L	https://pubmed.ncbi.nlm.nih.gov/31838251/	Public	BGISEQ	PE	50	Random	no	Vitis vinifera	Red Globe	Ripening berries	Skin	100 DAF	Before fruit ripening period (100 DAF)	2020-10	treatment	Control	No	-	-	15 berries collected from 3 to 5 control clusters
SRR8732039	PRJNA527184	Sun_L	https://pubmed.ncbi.nlm.nih.gov/31838251/	Public	BGISEQ	PE	50	Random	no	Vitis vinifera	Red Globe	Ripening berries	Skin	100 DAF	Before fruit ripening period (100 DAF)	2020-10	treatment	Control	No	-	-	15 berries collected from 3 to 5 control clusters
SRR8732042	PRJNA527184	Sun_L	https://pubmed.ncbi.nlm.nih.gov/31838251/	Public	BGISEQ	PE	50	Random	no	Vitis vinifera	Red Globe	Ripening berries	Skin	80 DAF	Veraison (80 DAF)	2020-10	treatment	Control	No	-	-	15 berries collected from 3 to 5 control clusters
SRR8732043	PRJNA527184	Sun_L	https://pubmed.ncbi.nlm.nih.gov/31838251/	Public	BGISEQ	PE	50	Random	no	Vitis vinifera	Red Globe	Ripening berries	Skin	80 DAF	Veraison (80 DAF)	2020-10	treatment	Control	No	-	-	15 berries collected from 3 to 5 control clusters
SRR8732046	PRJNA527184	Sun_L	https://pubmed.ncbi.nlm.nih.gov/31838251/	Public	BGISEQ	PE	50	Random	no	Vitis vinifera	Red Globe	Green berries	Skin	40 DAF	Before veraison (40 DAF)	2020-10	treatment	Control	No	-	-	15 berries collected from 3 to 5 control clusters
SRR8732048	PRJNA527184	Sun_L	https://pubmed.ncbi.nlm.nih.gov/31838251/	Public	BGISEQ	PE	50	Random	no	Vitis vinifera	Red Globe	Green berries	Skin	40 DAF	Before veraison (40 DAF)	2020-10	treatment	Control	No	-	-	15 berries collected from 3 to 5 control clusters
SRR8732049	PRJNA527184	Sun_L	https://pubmed.ncbi.nlm.nih.gov/31838251/	Public	BGISEQ	PE	50	Random	no	Vitis vinifera	Red Globe	Green berries	Skin	40 DAF	Before veraison (40 DAF)	2020-10	treatment	Control	No	-	-	15 berries collected from 3 to 5 control clusters
SRR8732050	PRJNA527184	Sun_L	https://pubmed.ncbi.nlm.nih.gov/31838251/	Public	BGISEQ	PE	50	Random	no	Vitis vinifera	Red Globe	Ripening berries	Skin	80 DAF	Veraison (80 DAF)	2020-10	treatment	Control	No	-	-	15 berries collected from 3 to 5 control clusters
SRR8732055	PRJNA527184	Sun_L	https://pubmed.ncbi.nlm.nih.gov/31838251/	Public	BGISEQ	PE	50	Random	no	Vitis vinifera	Red Globe	Ripening berries	Skin	120 DAF	Fruit ripening period (120 DAF)	2020-10	treatment	Control	No	-	-	15 berries collected from 3 to 5 control clusters
SRR8916048	PRJNA533137	Sun_RZ	https://pubmed.ncbi.nlm.nih.gov/31878879/	Public	Illumina	SE	49	PolyA	no	Vitis vinifera	Cabernet Sauvignon	Green berries	Without seeds	E-L 29	E-L 29	2020-11	dev_treatment	Control	No	-	-	GEO dataset GSE129916
SRR8916049	PRJNA533137	Sun_RZ	https://pubmed.ncbi.nlm.nih.gov/31878879/	Public	Illumina	SE	49	PolyA	no	Vitis vinifera	Cabernet Sauvignon	Green berries	Without seeds	E-L 29	E-L 29	2020-11	dev_treatment	Control	No	-	-	GEO dataset GSE129916
SRR8916050	PRJNA533137	Sun_RZ	https://pubmed.ncbi.nlm.nih.gov/31878879/	Public	Illumina	SE	49	PolyA	no	Vitis vinifera	Cabernet Sauvignon	Green berries	Without seeds	E-L 29	E-L 29	2020-11	dev_treatment	Control	No	-	-	GEO dataset GSE129916
SRR8916051	PRJNA533137	Sun_RZ	https://pubmed.ncbi.nlm.nih.gov/31878879/	Public	Illumina	SE	49	PolyA	no	Vitis vinifera	Cabernet Sauvignon	Green berries	Without seeds	E-L 31	E-L 31	2020-11	dev_treatment	Control	No	-	-	GEO dataset GSE129916
SRR8916052	PRJNA533137	Sun_RZ	https://pubmed.ncbi.nlm.nih.gov/31878879/	Public	Illumina	SE	49	PolyA	no	Vitis vinifera	Cabernet Sauvignon	Green berries	Without seeds	E-L 31	E-L 31	2020-11	dev_treatment	Control	No	-	-	GEO dataset GSE129916
SRR8916053	PRJNA533137	Sun_RZ	https://pubmed.ncbi.nlm.nih.gov/31878879/	Public	Illumina	SE	49	PolyA	no	Vitis vinifera	Cabernet Sauvignon	Green berries	Without seeds	E-L 31	E-L 31	2020-11	dev_treatment	Control	No	-	-	GEO dataset GSE129916
SRR8916054	PRJNA533137	Sun_RZ	https://pubmed.ncbi.nlm.nih.gov/31878879/	Public	Illumina	SE	49	PolyA	no	Vitis vinifera	Cabernet Sauvignon	Ripening berries	Without seeds	E-L 35	E-L 35	2020-11	dev_treatment	Control	No	-	-	GEO dataset GSE129916
SRR8916055	PRJNA533137	Sun_RZ	https://pubmed.ncbi.nlm.nih.gov/31878879/	Public	Illumina	SE	49	PolyA	no	Vitis vinifera	Cabernet Sauvignon	Ripening berries	Without seeds	E-L 35	E-L 35	2020-11	dev_treatment	Control	No	-	-	GEO dataset GSE129916
SRR8916056	PRJNA533137	Sun_RZ	https://pubmed.ncbi.nlm.nih.gov/31878879/	Public	Illumina	SE	49	PolyA	no	Vitis vinifera	Cabernet Sauvignon	Ripening berries	Without seeds	E-L 35	E-L 35	2020-11	dev_treatment	Control	No	-	-	GEO dataset GSE129916
SRR8916057	PRJNA533137	Sun_RZ	https://pubmed.ncbi.nlm.nih.gov/31878879/	Public	Illumina	SE	49	PolyA	no	Vitis vinifera	Cabernet Sauvignon	Ripening berries	Without seeds	E-L 36	E-L 36	2020-11	dev_treatment	Control	No	-	-	GEO dataset GSE129916
SRR8916058	PRJNA533137	Sun_RZ	https://pubmed.ncbi.nlm.nih.gov/31878879/	Public	Illumina	SE	49	PolyA	no	Vitis vinifera	Cabernet Sauvignon	Ripening berries	Without seeds	E-L 36	E-L 36	2020-11	dev_treatment	Control	No	-	-	GEO dataset GSE129916
SRR8916059	PRJNA533137	Sun_RZ	https://pubmed.ncbi.nlm.nih.gov/31878879/	Public	Illumina	SE	49	PolyA	no	Vitis vinifera	Cabernet Sauvignon	Ripening berries	Without seeds	E-L 36	E-L 36	2020-11	dev_treatment	Control	No	-	-	GEO dataset GSE129916
SRR8916060	PRJNA533137	Sun_RZ	https://pubmed.ncbi.nlm.nih.gov/31878879/	Public	Illumina	SE	49	PolyA	no	Vitis vinifera	Cabernet Sauvignon	Ripening berries	Without seeds	E-L 37	E-L 37	2020-11	dev_treatment	Control	No	-	-	GEO dataset GSE129916
SRR8916061	PRJNA533137	Sun_RZ	https://pubmed.ncbi.nlm.nih.gov/31878879/	Public	Illumina	SE	49	PolyA	no	Vitis vinifera	Cabernet Sauvignon	Ripening berries	Without seeds	E-L 37	E-L 37	2020-11	dev_treatment	Control	No	-	-	GEO dataset GSE129916
SRR8916062	PRJNA533137	Sun_RZ	https://pubmed.ncbi.nlm.nih.gov/31878879/	Public	Illumina	SE	49	PolyA	no	Vitis vinifera	Cabernet Sauvignon	Ripening berries	Without seeds	E-L 37	E-L 37	2020-11	dev_treatment	Control	No	-	-	GEO dataset GSE129916
SRR8916063	PRJNA533137	Sun_RZ	https://pubmed.ncbi.nlm.nih.gov/31878879/	Public	Illumina	SE	49	PolyA	no	Vitis vinifera	Cabernet Sauvignon	Ripening berries	Without seeds	E-L 38	E-L 38	2020-11	dev_treatment	Control	No	-	-	GEO dataset GSE129916
SRR8916064	PRJNA533137	Sun_RZ	https://pubmed.ncbi.nlm.nih.gov/31878879/	Public	Illumina	SE	49	PolyA	no	Vitis vinifera	Cabernet Sauvignon	Ripening berries	Without seeds	E-L 38	E-L 38	2020-11	dev_treatment	Control	No	-	-	GEO dataset GSE129916
SRR8916065	PRJNA533137	Sun_RZ	https://pubmed.ncbi.nlm.nih.gov/31878879/	Public	Illumina	SE	49	PolyA	no	Vitis vinifera	Cabernet Sauvignon	Ripening berries	Without seeds	E-L 38	E-L 38	2020-11	dev_treatment	Control	No	-	-	GEO dataset GSE129916

## Sheet: PN40024.v4.1.REF.b2g_unfiltered
Sequence_Name	Sequence_Description	Sequence Length	Blast Hits Count	Blast Min E-Value	Blast Similarity Mean	Blast Top Hit Taxonomy Name	Blast Top Hit Similarity	Annotation GO Count	Annotation GO ID	Enzyme Code	InterPro Accession	InterPro GO ID
Vitvi10g04000_t001	XP_034697099.1uncharacterized protein LOC117922966 isoform X1	137	1	1.5e-77	0.9389	Vitis riparia	0.9389				noIPR;noIPR	;
Vitvi10g04001_t001	XP_010651850.1 cell division cycle and apoptosis regulator protein 1	148	3	5.8e-36	0.5889	Vitis vinifera	0.5889				noIPR;noIPR;noIPR	;;
Vitvi10g04002_t001	KAF5753280.1putative NADH dehydrogenase (quinone)	340	12	1.3e-211	0.9402	Camellia sinensis	0.9527	8	GO:0008137;GO:0009535;GO:0016021;GO:0022900;GO:0046872;GO:0048038;GO:0051287;GO:0051539	EC:7.1.1.2;EC:1.6.5.11;EC:1.6.5.2	IPR001694;IPR001135;IPR029014;IPR001694;noIPR;IPR018086;IPR029014	GO:0016020;GO:0048038/GO:0016651/GO:0051287;;GO:0016020;;GO:0016020;
Vitvi10g00002_t001	XP_010655344.2PREDICTED: uncharacterized protein LOC100253788, partial	528	2	0	0.9943	Vitis vinifera	1	1	GO:0005515		IPR019734;IPR001214;IPR011990;IPR001214;noIPR;noIPR;IPR001214;noIPR;noIPR;IPR011990	GO:0005515;GO:0005515;GO:0005515;GO:0005515;;;GO:0005515;;;GO:0005515
Vitvi10g00003_t001	XP_021723034.1putative receptor-like protein kinase At4g00960	225	20	1.2e-81	0.6816	Gossypium gossypioides	0.7336	4	GO:0004672;GO:0005524;GO:0006468;GO:0016020	EC:2.7.1	noIPR;noIPR;IPR001245;noIPR;noIPR;IPR017441;IPR000719;IPR011009	;;GO:0004672/GO:0006468;;;GO:0005524;GO:0005524/GO:0004672/GO:0006468;
Vitvi10g04003_t001	RVW45858.1Cysteine-rich receptor-like protein kinase 25	323	2	7.5e-210	0.8585	Vitis vinifera	0.8599	4	GO:0004672;GO:0005524;GO:0006468;GO:0016021	EC:2.7.1	IPR038408;IPR002902;noIPR;noIPR;noIPR;IPR002902;IPR002902	;;;;;;
Vitvi10g04004_t001	XP_002265625.3 cysteine-rich receptor-like protein kinase 15	135	3	1.4e-85	1	Vitis vinifera	1	4	GO:0004672;GO:0005524;GO:0006468;GO:0016021	EC:2.7.1	noIPR;noIPR;noIPR;IPR011009	;;;
Vitvi10g00007_t001	RVW45851.1Cysteine-rich receptor-like protein kinase 8	235	2	1.6e-107	0.8186	Vitis vinifera	0.8233	5	GO:0004672;GO:0005524;GO:0006468;GO:0016021;GO:0016887	EC:2.7.1	IPR000719;IPR000719;IPR013126;noIPR;noIPR;noIPR;IPR008271;IPR000719;IPR011009	GO:0005524/GO:0004672/GO:0006468;GO:0005524/GO:0004672/GO:0006468;GO:0016887/GO:0005524;;;;GO:0004672/GO:0006468;GO:0005524/GO:0004672/GO:0006468;
Vitvi10g00008_t001	RVW96793.1Cysteine-rich receptor-like protein kinase 25	81	5	3.6e-30	0.9072	Vitis vinifera	0.913	5	GO:0004672;GO:0005524;GO:0006468;GO:0006749;GO:0016021	EC:2.7.1	noIPR;IPR001245;noIPR;noIPR;IPR000719;IPR011009	;GO:0004672/GO:0006468;;;GO:0005524/GO:0004672/GO:0006468;
Vitvi10g00011_t001	XP_019078295.1 pentatricopeptide repeat-containing protein At1g09220, mitochondrial	470	4	3.7e-303	0.96	Vitis vinifera	1	1	GO:0005515		IPR002885;IPR002885;IPR002885;IPR002885;IPR011990;noIPR;noIPR;IPR002885;IPR002885;IPR002885;IPR002885	;;;;GO:0005515;;;;;;
Vitvi10g01605_t001	CBI23162.3unnamed protein product, partial	100	1	2.5e-43	1	Vitis vinifera	1	1	GO:0006457		noIPR;IPR044632	;GO:0006457
Vitvi10g00012_t001	XP_010655347.1 probable UDP-3-O-acylglucosamine N-acyltransferase 2, mitochondrial isoform X2	289	4	1.3e-191	0.9828	Vitis vinifera	1	2	GO:0009245;GO:0016410	EC:2.3.1	IPR001451;IPR007691;noIPR;IPR007691;IPR007691;IPR011004	;GO:0009245/GO:0016410;;GO:0009245/GO:0016410;GO:0009245/GO:0016410;
Vitvi10g04005_t001	RVX08072.1Protein NDR1	197	2	6.7e-137	0.9898	Vitis vinifera	1	2	GO:0016021;GO:0098542		IPR004864;noIPR;IPR044839	;;GO:0098542
Vitvi10g04006_t001	KAF5728610.1protein NDR1-like	165	8	1.8e-40	0.6232	Tripterygium wilfordii	0.628	1	GO:0098542		IPR004864;noIPR;IPR044839	;;GO:0098542
Vitvi10g00015_t001	XP_002265341.1 NDR1/HIN1-Like protein 3	215	2	6.6e-155	0.9977	Vitis vinifera	1	4	GO:0009506;GO:0016021;GO:0046658;GO:0098542		IPR004864;noIPR;IPR044839	;;GO:0098542
Vitvi10g04007_t001	---NA---	122									noIPR;noIPR;noIPR	;;
Vitvi10g00016_t001	RVW46004.1Auxin response factor 18	249	1	2.7e-150	0.7882	Vitis vinifera	0.7882	5	GO:0003677;GO:0005515;GO:0006355;GO:0009725;GO:0016491	EC:1	noIPR;IPR044835;noIPR;IPR000270;noIPR	;GO:0009725/GO:0003677/GO:0006355;;GO:0005515;
Vitvi10g00017_t001	XP_002268360.1 peroxidase 27	326	2	3.5e-235	0.9939	Vitis vinifera	1	9	GO:0004601;GO:0005576;GO:0006979;GO:0009505;GO:0009506;GO:0020037;GO:0042744;GO:0046872;GO:0098869	EC:1.11.1	IPR002016;IPR000823;IPR002016;noIPR;noIPR;noIPR;noIPR;IPR019793;IPR019794;IPR002016;IPR033905;IPR010255	GO:0020037/GO:0004601/GO:0006979;GO:0020037/GO:0004601/GO:0006979;GO:0020037/GO:0004601/GO:0006979;;;;;;GO:0004601;GO:0020037/GO:0004601/GO:0006979;GO:0004601/GO:0042744;GO:0020037/GO:0004601/GO:0006979
Vitvi10g01606_t001	XP_010655350.1PREDICTED: uncharacterized protein LOC104880450 isoform X2	221	2	7.8e-141	0.9889	Vitis vinifera	1				noIPR;noIPR;noIPR	;;
Vitvi10g01606_t002	XP_010655350.1PREDICTED: uncharacterized protein LOC104880450 isoform X2	197	3	5.8e-123	1	Vitis vinifera	1	1	GO:0016021		noIPR;noIPR	;
Vitvi10g04008_t001	---NA---	84
Vitvi10g00019_t001	XP_002268248.1 pyruvate, phosphate dikinase regulatory protein 2	403	3	4.4e-289	0.995	Vitis vinifera	1	3	GO:0004674;GO:0005524;GO:0006468	EC:2.7.1	IPR005177;noIPR;noIPR;noIPR;IPR005177;IPR026565	GO:0005524/GO:0016772;;;;GO:0005524/GO:0016772;
Vitvi10g00020_t001	XP_002268173.2 gibberellin 2-beta-dioxygenase 8	421	2	0	0.9988	Vitis vinifera/Vitis vinifera subsp. caucasica	1				noIPR;IPR044861;IPR027443;IPR026992;noIPR;noIPR;IPR005123;noIPR	;;;;;;;
Vitvi10g00022_t001	CBI23169.3unnamed protein product, partial	411	1	1.2e-285	1	Vitis vinifera	1	3	GO:0005789;GO:0006457;GO:0016021		IPR001623;IPR001623;IPR001623;IPR036869;noIPR;noIPR;IPR044632;IPR018253;IPR001623;IPR001623;IPR036869	;;;;;;GO:0006457;;;;
Vitvi10g00023_t002	XP_010655352.1 tyrosyl-DNA phosphodiesterase 1 isoform X1	678	2	0	0.9978	Vitis vinifera	1	9	GO:0000012;GO:0003690;GO:0003697;GO:0004527;GO:0005515;GO:0005634;GO:0006302;GO:0017005;GO:0090305	EC:3.1.4	IPR010347;noIPR;noIPR;noIPR;IPR010347;noIPR;IPR000253;noIPR;noIPR;IPR008984;noIPR	GO:0008081/GO:0005634/GO:0006281;;;;GO:0008081/GO:0005634/GO:0006281;;GO:0005515;;;GO:0005515;
Vitvi10g00023_t003	XP_019078223.1 tyrosyl-DNA phosphodiesterase 1 isoform X2	557	4	0	0.9982	Vitis vinifera	1	8	GO:0000012;GO:0003690;GO:0003697;GO:0004527;GO:0005634;GO:0006302;GO:0017005;GO:0090305	EC:3.1.4	noIPR;IPR010347;noIPR;IPR010347;noIPR;noIPR;noIPR;noIPR	;GO:0008081/GO:0005634/GO:0006281;;GO:0008081/GO:0005634/GO:0006281;;;;
Vitvi10g00023_t004	XP_019078223.1 tyrosyl-DNA phosphodiesterase 1 isoform X2	437	5	0	0.9886	Vitis vinifera	1	8	GO:0000012;GO:0003690;GO:0003697;GO:0004527;GO:0005634;GO:0006302;GO:0017005;GO:0090305	EC:3.1.4	noIPR;noIPR;IPR010347;noIPR;IPR010347;noIPR;noIPR;noIPR	;;GO:0008081/GO:0005634/GO:0006281;;GO:0008081/GO:0005634/GO:0006281;;;
Vitvi10g00023_t001	XP_010655352.1 tyrosyl-DNA phosphodiesterase 1 isoform X1	678	2	0	0.9978	Vitis vinifera	1	9	GO:0000012;GO:0003690;GO:0003697;GO:0004527;GO:0005515;GO:0005634;GO:0006302;GO:0017005;GO:0090305	EC:3.1.4	IPR010347;noIPR;noIPR;noIPR;IPR010347;noIPR;IPR000253;noIPR;noIPR;IPR008984;noIPR	GO:0008081/GO:0005634/GO:0006281;;;;GO:0008081/GO:0005634/GO:0006281;;GO:0005515;;;GO:0005515;
Vitvi10g00024_t001	XP_002265032.1 polyubiquitin-C	284	3	3.9e-186	0.9965	Vitis vinifera	1	6	GO:0005654;GO:0005829;GO:0031593;GO:0043130;GO:0043161;GO:0070628		IPR000626;noIPR;noIPR;IPR000626;noIPR;noIPR;noIPR;IPR000626;IPR000626;IPR000626;noIPR;noIPR;IPR029071;IPR029071;IPR029071	GO:0005515;;;GO:0005515;;;;GO:0005515;GO:0005515;GO:0005515;;;;;
Vitvi10g01607_t001	XP_002267815.1 probable serine/threonine-protein kinase WNK4	417	3	2.6e-283	0.9689	Vitis vinifera	1	5	GO:0004674;GO:0005524;GO:0005737;GO:0006468;GO:0035556	EC:2.7.1	IPR000719;noIPR;IPR000719;noIPR;noIPR;noIPR;noIPR;noIPR;noIPR;IPR008271;IPR000719;noIPR;IPR011009	GO:0005524/GO:0004672/GO:0006468;;GO:0005524/GO:0004672/GO:0006468;;;;;;;GO:0004672/GO:0006468;GO:0005524/GO:0004672/GO:0006468;;
Vitvi10g01608_t001	XP_002267669.1 MYB-like transcription factor ETC1	75	2	1.9e-44	1	Vitis vinifera/Vitis riparia	1	3	GO:0000976;GO:0005634;GO:0030154		IPR001005;noIPR;IPR017930;noIPR;noIPR;noIPR;noIPR;IPR001005;IPR017930;IPR001005;IPR009057	;;;;;;;;;;
Vitvi10g00025_t001	XP_002267539.1 cysteine-rich PDZ-binding protein isoform X1	96	20	6.7e-68	0.9797	Vitis vinifera/Vitis riparia	1	3	GO:0005737;GO:0008017;GO:0031122		IPR019367;IPR019367	;
Vitvi10g00026_t001	XP_002264995.1 probable xyloglucan endotransglucosylase/hydrolase protein 8	300	1	7.7e-235	1	Vitis vinifera/Vitis riparia	1	7	GO:0004553;GO:0005618;GO:0010411;GO:0016762;GO:0042546;GO:0048046;GO:0071555	EC:2.4.1.207;EC:3.2.1	IPR008264;IPR016455;noIPR;IPR000757;IPR010713;noIPR;IPR044791;IPR008263;IPR000757;IPR016455;IPR013320	GO:0004553/GO:0005975;GO:0016762/GO:0042546/GO:0010411;;GO:0004553/GO:0005975;GO:0048046/GO:0006073/GO:0005618/GO:0016762;;GO:0004553;GO:0004553/GO:0005975;GO:0004553/GO:0005975;GO:0016762/GO:0042546/GO:0010411;
Vitvi10g00027_t001	XP_002267414.1 thiamine thiazole synthase 2, chloroplastic	355	3	5.8e-251	0.9972	Vitis vinifera	1	6	GO:0005506;GO:0005829;GO:0009228;GO:0009570;GO:0016763;GO:0052837	EC:2.4.2	noIPR;IPR036188;noIPR;IPR002922;noIPR;noIPR;IPR027495;IPR036188	;;;;;;GO:0009228;
Vitvi10g00028_t001	XP_010655354.1 pentatricopeptide repeat-containing protein At4g21170 isoform X1	569	2	0	1	Vitis vinifera	1	2	GO:0005515;GO:0005739		IPR002885;IPR011990;IPR002885;IPR011990;IPR002885;IPR011990;IPR011990;noIPR;noIPR;IPR002885;IPR002885;IPR002885;IPR002885	;GO:0005515;;GO:0005515;;GO:0005515;GO:0005515;;;;;;
Vitvi10g00029_t001	XP_002267126.1 probable dolichyl-diphosphooligosaccharide--protein glycosyltransferase subunit 3B	339	2	2.4e-235	1	Vitis vinifera	1	3	GO:0008250;GO:0016021;GO:0018279		noIPR;IPR021149;IPR021149;noIPR	;;;
Vitvi10g00030_t001	XP_034698818.1nuclear transport factor 2B	140	1	3.3e-98	1	Vitis riparia	1				noIPR;IPR002075;noIPR;noIPR;IPR018222;IPR018222;IPR032710	;;;;;;
Vitvi10g00031_t001	XP_002266980.1 pectinesterase	528	3	0	0.9987	Vitis vinifera	1	9	GO:0005576;GO:0005618;GO:0016021;GO:0030599;GO:0042545;GO:0043086;GO:0045330;GO:0045490;GO:0046910	EC:3.1.1.11	IPR006501;IPR006501;IPR000070;IPR035513;IPR012334;IPR006501;noIPR;noIPR;IPR018040;IPR033131;noIPR;IPR035513;IPR011050	GO:0004857;GO:0004857;GO:0042545/GO:0030599;;;GO:0004857;;;;;;;
Vitvi10g01609_t001	XP_002266933.1 CRIB domain-containing protein RIC10	160	2	3.7e-91	1	Vitis vinifera	1				IPR000095;IPR000095;IPR036936;noIPR;noIPR;IPR044510;noIPR;IPR000095;noIPR	;;;;;;;;
Vitvi10g00032_t001	XP_002264920.2 COBRA-like protein 10	654	3	0	0.9995	Vitis vinifera/Vitis riparia	1	2	GO:0010215;GO:0031225		IPR006918;noIPR;noIPR	GO:0031225/GO:0010215;;
Vitvi10g00033_t001	XP_002266688.1 homeobox-leucine zipper protein MERISTEM L1	726	3	0	0.9944	Vitis vinifera	1	5	GO:0000981;GO:0003677;GO:0005634;GO:0006357;GO:0008289		noIPR;IPR002913;IPR001356;IPR002913;IPR023393;IPR001356;noIPR;noIPR;noIPR;noIPR;IPR042160;IPR017970;IPR002913;IPR001356;noIPR;IPR001356;IPR009057;noIPR;noIPR	;GO:0008289;GO:0003677;GO:0008289;;GO:0003677;;;;;;GO:0000981/GO:0006355;GO:0008289;GO:0003677;;GO:0003677;;;
Vitvi10g00034_t001	XP_002264829.1 tryptophan synthase beta chain 1	477	2	0	0.9948	Vitis vinifera	1	3	GO:0000162;GO:0004834;GO:0005737	EC:4.2.1.20	IPR036052;IPR001926;IPR023026;IPR036052;IPR006654;noIPR;noIPR;noIPR;IPR006653;IPR023026;IPR006654;IPR036052	;;GO:0004834/GO:0000162;;GO:0004834/GO:0006568;;;;GO:0004834/GO:0006568;GO:0004834/GO:0000162;GO:0004834/GO:0006568;
Vitvi10g04009_t001	RVW46031.1Polyadenylation and cleavage factor-like 4	85	1	6.2e-44	0.9872	Vitis vinifera	0.9872
Vitvi10g00035_t001	XP_010655357.1 polyadenylation and cleavage factor homolog 4 isoform X1	1046	3	0	0.9939	Vitis vinifera	1	5	GO:0000993;GO:0003729;GO:0006369;GO:0006378;GO:0006379		IPR006569;IPR008942;IPR006569;noIPR;noIPR;noIPR;IPR045154;noIPR;IPR013087;IPR006569;noIPR;IPR008942	;;;;;;GO:0006378/GO:0003729/GO:0000993/GO:0006369/GO:0006379;;;;;
Vitvi10g01611_t001	XP_010655411.1 F-box/LRR-repeat protein At3g03360-like	501	2	0	1	Vitis vinifera	1	1	GO:0005515		IPR001810;noIPR;noIPR;noIPR;IPR036047;noIPR	GO:0005515;;;;GO:0005515;
Vitvi10g00037_t001	RVW46032.1Glucose-6-phosphate/phosphate translocator 2, chloroplastic	562	1	0	0.9808	Vitis vinifera	0.9808	4	GO:0016021;GO:0022857;GO:0031969;GO:0055085	EC:7	IPR004853;IPR004696;noIPR;noIPR;noIPR;noIPR;noIPR;noIPR;noIPR	;GO:0016021/GO:0055085/GO:0022857;;;;;;;
Vitvi10g00039_t001	XP_002264678.3 beta-glucosidase 46 isoform X2	521	6	0	0.9598	Vitis vinifera	1	2	GO:0004553;GO:0005975	EC:3.2.1	IPR001360;IPR001360;noIPR;IPR001360;noIPR;IPR033132;IPR017853	GO:0004553/GO:0005975;GO:0004553/GO:0005975;;GO:0004553/GO:0005975;;;
Vitvi10g00039_t002	XP_002264678.3 beta-glucosidase 46 isoform X2	463	7	0	0.9604	Vitis vinifera	1	2	GO:0004553;GO:0005975	EC:3.2.1	IPR001360;noIPR;IPR001360;IPR001360;noIPR;IPR017853	GO:0004553/GO:0005975;;GO:0004553/GO:0005975;GO:0004553/GO:0005975;;
Vitvi10g00040_t001	XP_019078311.1 RNA pseudouridine synthase 6, chloroplastic isoform X1	472	3	0	0.9839	Vitis vinifera	1	3	GO:0000455;GO:0003723;GO:0009982	EC:5.4	IPR006145;noIPR;noIPR;noIPR;IPR006145;IPR020103	GO:0009982/GO:0001522/GO:0009451/GO:0003723;;;;GO:0009982/GO:0001522/GO:0009451/GO:0003723;GO:0009982/GO:0001522/GO:0009451/GO:0003723
Vitvi10g00041_t001	XP_002265911.1 cytochrome P450 77A1	508	2	0	1	Vitis vinifera	1	4	GO:0005506;GO:0016020;GO:0016709;GO:0020037	EC:1.14.13	IPR002401;IPR001128;IPR001128;IPR036396;noIPR;noIPR;IPR017972;IPR036396	GO:0020037/GO:0005506/GO:0004497/GO:0016705;GO:0020037/GO:0005506/GO:0004497/GO:0016705;GO:0020037/GO:0005506/GO:0004497/GO:0016705;GO:0020037/GO:0005506/GO:0004497/GO:0016705;;;GO:0005506/GO:0016705;GO:0020037/GO:0005506/GO:0004497/GO:0016705
Vitvi10g00043_t001	XP_010655358.1 glutamate receptor 3.7-like isoform X2	130	2	2.4e-86	0.9961	Vitis vinifera	1				noIPR;noIPR	;
Vitvi10g00044_t001	XP_002265831.2 adenosine deaminase-like protein isoform X1	359	3	2.8e-260	0.9882	Vitis vinifera	1	3	GO:0004000;GO:0006154;GO:0046103	EC:3.5.4.4	IPR001365;noIPR;noIPR;IPR006330;noIPR;IPR032466	GO:0019239;;;GO:0019239;;
Vitvi10g00044_t002	XP_002265831.2 adenosine deaminase-like protein isoform X1	359	3	2.8e-260	0.9882	Vitis vinifera	1	3	GO:0004000;GO:0006154;GO:0046103	EC:3.5.4.4	IPR001365;noIPR;noIPR;IPR006330;noIPR;IPR032466	GO:0019239;;;GO:0019239;;
Vitvi10g00045_t001	XP_010655360.1 phospholipase A I isoform X1	1316	5	0	0.9899	Vitis vinifera	1	9	GO:0004620;GO:0005515;GO:0006631;GO:0009507;GO:0009695;GO:0016020;GO:0016042;GO:0047372;GO:0050832	EC:3.1.1.23;EC:3.1.1.1	IPR003591;noIPR;IPR000225;IPR011989;IPR002641;IPR032675;IPR001611;noIPR;noIPR;noIPR;noIPR;IPR002641;noIPR;noIPR;IPR016035;IPR016024	;;GO:0005515;;GO:0006629;;GO:0005515;;;;;GO:0006629;;;;
Vitvi10g01612_t001	RVW45889.1hypothetical protein CK203_068673	226	1	5e-160	1	Vitis vinifera	1				noIPR;noIPR	;
Vitvi10g00046_t001	XP_010655363.1 serine/threonine-protein kinase CDL1	363	4	2.2e-266	0.9993	Vitis vinifera	1	3	GO:0004674;GO:0005524;GO:0006468	EC:2.7.1	noIPR;noIPR;IPR000719;noIPR;noIPR;noIPR;IPR017441;IPR008271;IPR000719;noIPR;IPR011009	;;GO:0005524/GO:0004672/GO:0006468;;;;GO:0005524;GO:0004672/GO:0006468;GO:0005524/GO:0004672/GO:0006468;;
Vitvi10g00047_t001	XP_002264460.2 CDP-diacylglycerol--glycerol-3-phosphate 3-phosphatidyltransferase 1, chloroplastic	348	3	4.9e-244	0.999	Vitis vinifera	1	5	GO:0005739;GO:0008808;GO:0016020;GO:0030145;GO:0032049	EC:2.7.8	IPR000462;IPR043130;noIPR;noIPR;IPR000462	GO:0008654/GO:0016780/GO:0016020;;;;GO:0008654/GO:0016780/GO:0016020
Vitvi10g00048_t001	XP_010655364.1 malonyl-CoA decarboxylase, mitochondrial	554	3	0	0.991	Vitis vinifera	1	7	GO:0005759;GO:0005782;GO:0006085;GO:0006633;GO:0046321;GO:0050080;GO:2001294	EC:4.1.1.9	IPR007956;IPR035372;IPR042303;IPR038351;IPR038917	GO:0006633/GO:0050080;;;;GO:0006633/GO:0050080
Vitvi10g00048_t002	XP_010655364.1 malonyl-CoA decarboxylase, mitochondrial	554	3	0	0.991	Vitis vinifera	1	7	GO:0005759;GO:0005782;GO:0006085;GO:0006633;GO:0046321;GO:0050080;GO:2001294	EC:4.1.1.9	IPR007956;IPR035372;IPR042303;IPR038351;IPR038917	GO:0006633/GO:0050080;;;;GO:0006633/GO:0050080
Vitvi10g00048_t003	XP_010655364.1 malonyl-CoA decarboxylase, mitochondrial	516	3	0	0.9911	Vitis vinifera	1	7	GO:0005759;GO:0005782;GO:0006085;GO:0006633;GO:0046321;GO:0050080;GO:2001294	EC:4.1.1.9	IPR007956;IPR035372;IPR038351;IPR042303;IPR038917	GO:0006633/GO:0050080;;;;GO:0006633/GO:0050080
Vitvi10g00049_t001	RVW45916.1Chaperonin-like RBCX protein 1, chloroplastic	184	1	1.8e-99	0.9226	Vitis vinifera	0.9226	5	GO:0006457;GO:0015977;GO:0015979;GO:0044183;GO:0110102		IPR038052;IPR003435;IPR003435;noIPR;IPR038052	;GO:0044183/GO:0110102;GO:0044183/GO:0110102;;
Vitvi10g00050_t001	RVW45915.1LysM domain receptor-like kinase 3	809	2	0	0.9793	Vitis vinifera	0.983	7	GO:0004674;GO:0005524;GO:0005886;GO:0006468;GO:0016021;GO:0019199;GO:0045087	EC:2.7.1	IPR000719;IPR001245;noIPR;noIPR;noIPR;noIPR;noIPR;noIPR;noIPR;noIPR;IPR044812;IPR044812;noIPR;noIPR;IPR017441;IPR008271;IPR000719;noIPR;IPR011009	GO:0005524/GO:0004672/GO:0006468;GO:0004672/GO:0006468;;;;;;;;;GO:0045087/GO:0019199;GO:0045087/GO:0019199;;;GO:0005524;GO:0004672/GO:0006468;GO:0005524/GO:0004672/GO:0006468;;
Vitvi10g01613_t001	XP_010655365.1 lysM domain receptor-like kinase 3 isoform X4	621	6	0	0.9847	Vitis vinifera	1	7	GO:0004674;GO:0005524;GO:0005886;GO:0006468;GO:0016021;GO:0019199;GO:0045087	EC:2.7.1	IPR000719;IPR018392;IPR001245;noIPR;IPR018392;noIPR;IPR036779;noIPR;noIPR;noIPR;IPR044812;IPR017441;IPR008271;IPR000719;IPR018392;IPR018392;IPR018392;IPR018392;IPR011009	GO:0005524/GO:0004672/GO:0006468;;GO:0004672/GO:0006468;;;;;;;;GO:0045087/GO:0019199;GO:0005524;GO:0004672/GO:0006468;GO:0005524/GO:0004672/GO:0006468;;;;;
Vitvi10g00051_t001	XP_002264248.1 pentatricopeptide repeat-containing protein At3g12770	767	3	0	0.9965	Vitis vinifera	1	2	GO:0005515;GO:0008270		IPR002885;IPR011990;IPR011990;IPR002885;IPR002885;IPR011990;IPR032867;noIPR;noIPR;IPR002885;IPR002885;IPR002885;IPR002885;IPR002885	;GO:0005515;GO:0005515;;;GO:0005515;GO:0008270;;;;;;;
Vitvi10g00052_t001	XP_010655368.1 calcium permeable stress-gated cation channel 1	771	2	0	1	Vitis vinifera	1	4	GO:0005227;GO:0005886;GO:0016021;GO:0098655	EC:7	IPR003864;IPR027815;IPR032880;noIPR;noIPR;noIPR;noIPR;IPR045122	GO:0016020;;;;;;;GO:0005227
Vitvi10g00052_t002	XP_010655368.1 calcium permeable stress-gated cation channel 1	771	2	0	1	Vitis vinifera	1	4	GO:0005227;GO:0005886;GO:0016021;GO:0098655	EC:7	IPR003864;IPR027815;IPR032880;noIPR;noIPR;noIPR;noIPR;IPR045122	GO:0016020;;;;;;;GO:0005227
Vitvi10g00052_t003	XP_010655368.1 calcium permeable stress-gated cation channel 1	771	2	0	1	Vitis vinifera	1	4	GO:0005227;GO:0005886;GO:0016021;GO:0098655	EC:7	IPR003864;IPR027815;IPR032880;noIPR;noIPR;noIPR;noIPR;IPR045122	GO:0016020;;;;;;;GO:0005227
Vitvi10g00052_t004	XP_010655368.1 calcium permeable stress-gated cation channel 1	771	2	0	1	Vitis vinifera	1	4	GO:0005227;GO:0005886;GO:0016021;GO:0098655	EC:7	IPR003864;IPR027815;IPR032880;noIPR;noIPR;noIPR;noIPR;IPR045122	GO:0016020;;;;;;;GO:0005227
Vitvi10g00053_t001	XP_010655372.1 lysine-specific demethylase JMJ25	881	3	0	0.9917	Vitis vinifera	1	4	GO:0008168;GO:0032259;GO:0032454;GO:0033169	EC:1.14.11.65;EC:1.14.11.66;EC:2.1.1	IPR003347;noIPR;IPR003347;noIPR;noIPR;noIPR;noIPR;noIPR;noIPR;IPR045109;IPR001841;IPR003347;noIPR	;;;;;;;;;GO:0032454/GO:0033169;;;
Vitvi10g00054_t001	XP_002264138.1 leucine--tRNA ligase, chloroplastic/mitochondrial isoform X1	971	2	0	0.9949	Vitis vinifera	1	6	GO:0002161;GO:0004823;GO:0005524;GO:0005829;GO:0006429;GO:0106074	EC:6.1.1.4;EC:3.1.1.1	IPR002302;IPR002300;IPR013155;IPR002302;IPR015413;IPR009008;IPR014729;IPR025709;IPR014729;noIPR;IPR002302;IPR001412;IPR002302;noIPR;noIPR;IPR009080;noIPR;IPR009008	GO:0000166/GO:0006429/GO:0005524/GO:0004823;GO:0000166/GO:0004812/GO:0005524/GO:0006418;GO:0006418/GO:0004812;GO:0000166/GO:0006429/GO:0005524/GO:0004823;GO:0000166/GO:0004812/GO:0005524/GO:0006418;GO:0002161/GO:0006418;;GO:0002161/GO:0006418;;;GO:0000166/GO:0006429/GO:0005524/GO:0004823;GO:0000166/GO:0004812/GO:0005524/GO:0006418;GO:0000166/GO:0006429/GO:0005524/GO:0004823;;;GO:0000166/GO:000481…
Vitvi10g00055_t001	XP_034697131.1 glycosyltransferase BC10-like isoform X1	380	3	1.1e-280	1	Vitis vinifera/Vitis riparia	1	7	GO:0002161;GO:0004823;GO:0005524;GO:0006429;GO:0016021;GO:0016757;GO:0106074	EC:2.4;EC:6.1.1.4;EC:3.1.1.1	IPR003406;IPR044174;noIPR	GO:0016757/GO:0016020;GO:0016757;
Vitvi10g00055_t002	XP_034697131.1 glycosyltransferase BC10-like isoform X1	301	3	2.8e-214	1	Vitis vinifera/Vitis riparia	1	7	GO:0002161;GO:0004823;GO:0005524;GO:0006429;GO:0016021;GO:0016757;GO:0106074	EC:2.4;EC:6.1.1.4;EC:3.1.1.1	IPR003406;IPR044174;noIPR	GO:0016757/GO:0016020;GO:0016757;
Vitvi10g04010_t001	XP_010655374.1PREDICTED: uncharacterized protein LOC100853242	177	2	5.2e-122	1	Vitis vinifera/Vitis riparia	1				noIPR;noIPR;IPR010471;noIPR;noIPR	;;;;
Vitvi10g00056_t001	XP_019078195.1 pentatricopeptide repeat-containing protein At4g04370	732	3	0	0.9941	Vitis vinifera	1	1	GO:0005515		IPR002885;IPR002885;IPR011990;IPR002885;IPR011990;noIPR;noIPR;noIPR;noIPR;noIPR;noIPR;IPR002885;IPR002885;IPR002885;IPR002885;IPR002885;IPR002885;IPR002885;IPR002885;IPR011990	;;GO:0005515;;GO:0005515;;;;;;;;;;;;;;;GO:0005515
Vitvi10g00057_t001	XP_002263767.3 proline synthase co-transcribed bacterial homolog protein isoform X1	264	3	5e-184	0.9987	Vitis vinifera	1	1	GO:0030170		IPR011078;IPR029066;IPR011078;IPR001608;noIPR;noIPR;noIPR;IPR011078;noIPR;IPR011078;IPR011078;noIPR;IPR029066	GO:0030170;;GO:0030170;;;;;GO:0030170;;GO:0030170;GO:0030170;;
Vitvi10g01614_t001	XP_002264108.2 cytochrome b561 and DOMON domain-containing protein At3g25290	245	2	5.4e-178	1	Vitis vinifera	1	1	GO:0016021		IPR006593;IPR006593;noIPR;noIPR;noIPR;IPR006593;noIPR	;;;;;;
Vitvi10g01615_t001	XP_002263655.1 protein STIG1-like	171	3	4.6e-60	0.9858	Vitis vinifera	1				IPR006969;noIPR;IPR006969	;;
Vitvi10g01616_t001	XP_002263583.1 protein STIG1-like	171	2	2.3e-60	0.996	Vitis vinifera	1				IPR006969;noIPR;IPR006969	;;
Vitvi10g01617_t001	XP_002263884.1 stigma-specific STIG1-like protein 1	144	7	2.8e-68	0.9905	Vitis vinifera	1				IPR006969;noIPR;IPR006969	;;
Vitvi10g01618_t001	XP_002263768.1 stigma-specific STIG1-like protein 1	160	6	7.7e-77	0.985	Vitis vinifera	1				IPR006969;noIPR;IPR006969	;;
Vitvi10g01619_t001	XP_010655412.1 stigma-specific STIG1-like protein 1	160	7	1.2e-73	0.9532	Vitis vinifera	1				IPR006969;noIPR;IPR006969	;;
Vitvi10g01620_t001	XP_010655413.1 stigma-specific STIG1-like protein 1	161	1	2e-49	1	Vitis vinifera	1				IPR006969;noIPR;IPR006969	;;
Vitvi10g00060_t001	XP_002263656.1 stigma-specific STIG1-like protein 3	157	3	7.7e-71	0.9633	Vitis vinifera	1				IPR006969;noIPR;IPR006969;noIPR	;;;
Vitvi10g00061_t001	RVW46066.1putative pectate lyase 16	383	3	6.3e-286	0.9948	Vitis vinifera	1	3	GO:0030570;GO:0045490;GO:0046872	EC:4.2.2.2	IPR018082;IPR002022;IPR002022;IPR012334;noIPR;IPR045032;IPR011050	;;;;;GO:0030570;
Vitvi10g00062_t001	XP_002263584.1PREDICTED: uncharacterized protein LOC100250418	339	2	5e-262	0.9985	Vitis vinifera	1	2	GO:0016021;GO:0030247		IPR025287;noIPR;noIPR	GO:0030247;;
Vitvi10g00063_t001	XP_002263115.1 probable WRKY transcription factor 31	535	3	0	0.9969	Vitis vinifera	1	4	GO:0003700;GO:0005634;GO:0006355;GO:0043565		noIPR;IPR003657;IPR003657;IPR036576;noIPR;noIPR;noIPR;noIPR;noIPR;noIPR;IPR044810;IPR003657;IPR036576	;GO:0003700/GO:0043565/GO:0006355;GO:0003700/GO:0043565/GO:0006355;GO:0003700/GO:0043565/GO:0006355;;;;;;;GO:0003700;GO:0003700/GO:0043565/GO:0006355;GO:0003700/GO:0043565/GO:0006355
Vitvi10g00064_t001	XP_002262915.2 aspartic proteinase A1	514	2	0	0.9981	Vitis vinifera	1	3	GO:0004190;GO:0006508;GO:0006629	EC:3.4.23	IPR001461;noIPR;IPR021109;IPR021109;IPR008138;IPR033121;IPR007856;IPR001461;noIPR;IPR001969;IPR001969;IPR008139;IPR033121;IPR008139;IPR033869;IPR021109;IPR011001	GO:0004190/GO:0006508;;;;;;GO:0006629;GO:0004190/GO:0006508;;GO:0006508/GO:0004190;GO:0006508/GO:0004190;;;;GO:0004190;;
Vitvi10g00064_t002	XP_002262915.2 aspartic proteinase A1	514	2	0	0.9981	Vitis vinifera	1	3	GO:0004190;GO:0006508;GO:0006629	EC:3.4.23	IPR001461;noIPR;IPR021109;IPR021109;IPR008138;IPR033121;IPR007856;IPR001461;noIPR;IPR001969;IPR001969;IPR008139;IPR033121;IPR008139;IPR033869;IPR021109;IPR011001	GO:0004190/GO:0006508;;;;;;GO:0006629;GO:0004190/GO:0006508;;GO:0006508/GO:0004190;GO:0006508/GO:0004190;;;;GO:0004190;;
Vitvi10g00064_t003	XP_002262915.2 aspartic proteinase A1	514	2	0	0.9981	Vitis vinifera	1	3	GO:0004190;GO:0006508;GO:0006629	EC:3.4.23	IPR001461;noIPR;IPR021109;IPR021109;IPR008138;IPR033121;IPR007856;IPR001461;noIPR;IPR001969;IPR001969;IPR008139;IPR033121;IPR008139;IPR033869;IPR021109;IPR011001	GO:0004190/GO:0006508;;;;;;GO:0006629;GO:0004190/GO:0006508;;GO:0006508/GO:0004190;GO:0006508/GO:0004190;;;;GO:0004190;;
Vitvi10g01621_t001	XP_010655414.1 mitogen-activated protein kinase kinase kinase A-like	375	4	1.9e-265	0.9898	Vitis vinifera	0.9919	3	GO:0004672;GO:0005524;GO:0006468	EC:2.7.1	IPR000719;IPR000719;noIPR;noIPR;noIPR;noIPR;IPR008271;IPR017441;IPR000719;noIPR;IPR011009	GO:0005524/GO:0004672/GO:0006468;GO:0005524/GO:0004672/GO:0006468;;;;;GO:0004672/GO:0006468;GO:0005524;GO:0005524/GO:0004672/GO:0006468;;
Vitvi10g00065_t001	XP_002263520.2 S-type anion channel SLAH4 isoform X1	389	4	3.3e-274	0.9961	Vitis vinifera	1	6	GO:0005886;GO:0006873;GO:0008308;GO:0015698;GO:0016021;GO:0034220	EC:7	IPR004695;IPR038665;IPR030183;noIPR;noIPR	GO:0016021/GO:0055085;;GO:0016021/GO:0006873/GO:0008308;;
Vitvi10g04011_t001	XP_002262807.3 B-cell receptor-associated protein 31	221	2	4.2e-136	0.9977	Vitis vinifera	1	5	GO:0005789;GO:0006886;GO:0006888;GO:0016021;GO:0070973		noIPR;noIPR;IPR008417;noIPR	;;GO:0005783/GO:0016021/GO:0006886;
Vitvi10g00068_t001	XP_019078146.1 S-type anion channel SLAH4 isoform X2	125	7	6.9e-60	0.9121	Vitis vinifera	0.9231	6	GO:0005886;GO:0006873;GO:0008308;GO:0015698;GO:0016021;GO:0034220	EC:7	IPR038665;IPR004695;IPR030183;noIPR	;GO:0016021/GO:0055085;GO:0016021/GO:0006873/GO:0008308;
Vitvi10g00069_t001	XP_002262807.3 B-cell receptor-associated protein 31	179	2	1.3e-96	0.7851	Vitis vinifera	0.7873	5	GO:0005789;GO:0006886;GO:0006888;GO:0016021;GO:0070973		noIPR;noIPR;IPR008417;noIPR;noIPR	;;GO:0005783/GO:0016021/GO:0006886;;
Vitvi10g04012_t001	RVW45980.1putative F-box protein	151	10	7.7e-100	0.9788	Vitis vinifera	1				IPR027949;noIPR;IPR027949	;;
Vitvi10g04013_t001	RVW45975.1hypothetical protein CK203_068621	70	1	6.2e-37	1	Vitis vinifera	1
Vitvi10g04014_t001	RVW45974.1hypothetical protein CK203_068620	94	2	3.7e-36	0.9919	Vitis vinifera	1
Vitvi10g04015_t001	---NA---	68
Vitvi10g04016_t001	CAN67484.1hypothetical protein VITISV_041346	129	1	2.4e-72	0.9098	Vitis vinifera	0.9098
Vitvi10g00070_t002	XP_002269336.1 peroxisomal membrane protein PMP22 isoform X2	185	2	3.2e-129	0.9973	Vitis vinifera	1	1	GO:0016021		IPR007248;noIPR;IPR007248	GO:0016021;;GO:0016021
Vitvi10g00070_t005	XP_002269336.1 peroxisomal membrane protein PMP22 isoform X2	130	3	4.2e-90	1	Vitis vinifera	1	1	GO:0016021		IPR007248;IPR007248;noIPR	GO:0016021;GO:0016021;
Vitvi10g00070_t001	XP_002269336.1 peroxisomal membrane protein PMP22 isoform X2	185	2	3.2e-129	0.9973	Vitis vinifera	1	1	GO:0016021		IPR007248;noIPR;IPR007248	GO:0016021;;GO:0016021
Vitvi10g00070_t003	XP_002269336.1 peroxisomal membrane protein PMP22 isoform X2	130	3	4.2e-90	1	Vitis vinifera	1	1	GO:0016021		IPR007248;IPR007248;noIPR	GO:0016021;GO:0016021;
Vitvi10g00070_t004	XP_002269336.1 peroxisomal membrane protein PMP22 isoform X2	130	3	4.2e-90	1	Vitis vinifera	1	1	GO:0016021		IPR007248;IPR007248;noIPR	GO:0016021;GO:0016021;
Vitvi10g04017_t001	RVW45998.1putative F-box protein	182	7	5.2e-100	0.988	Vitis vinifera	1				IPR027949;noIPR;IPR027949	;;
Vitvi10g00073_t001	XP_002266593.2 dihydrolipoyllysine-residue succinyltransferase component of 2-oxoglutarate dehydrogenase complex 1, mitochondrial	473	3	6.1e-292	0.9979	Vitis vinifera	1	4	GO:0004149;GO:0006099;GO:0033512;GO:0045252	EC:2.3.1.61	IPR000089;IPR001078;noIPR;IPR006255;IPR023213;noIPR;noIPR;noIPR;noIPR;noIPR;IPR003016;IPR000089;noIPR;IPR011053;noIPR	;GO:0016746;;GO:0004149/GO:0006099/GO:0045252;;;;;;;;;;;
Vitvi10g00073_t002	XP_002266593.2 dihydrolipoyllysine-residue succinyltransferase component of 2-oxoglutarate dehydrogenase complex 1, mitochondrial	473	3	6.1e-292	0.9979	Vitis vinifera	1	4	GO:0004149;GO:0006099;GO:0033512;GO:0045252	EC:2.3.1.61	IPR000089;IPR001078;noIPR;IPR006255;IPR023213;noIPR;noIPR;noIPR;noIPR;noIPR;IPR003016;IPR000089;noIPR;IPR011053;noIPR	;GO:0016746;;GO:0004149/GO:0006099/GO:0045252;;;;;;;;;;;
Vitvi10g04018_t001	XP_019078059.1 DNA repair protein RAD16	788	2	0	0.9566	Vitis vinifera	0.9937	3	GO:0004386;GO:0005524;GO:0070615		noIPR;IPR014001;IPR001841;IPR001650;IPR000330;IPR000330;IPR013083;IPR027417;noIPR;IPR038718;IPR001650;noIPR;noIPR;noIPR;noIPR;noIPR;IPR017907;IPR001650;IPR001841;IPR014001;noIPR;noIPR;noIPR;IPR027417;IPR027417	;;;;GO:0005524/GO:0070615;GO:0005524/GO:0070615;;;;;;;;;;;;;;;;;;;
Vitvi10g00076_t001	XP_010655381.1 ATP-dependent helicase rhp16	780	3	0	0.9423	Vitis vinifera	0.9512	3	GO:0005524;GO:0046872;GO:0070615		IPR001841;IPR001650;IPR014001;IPR038718;IPR000330;IPR018957;IPR038718;IPR027417;IPR013083;IPR001650;noIPR;noIPR;noIPR;noIPR;noIPR;noIPR;noIPR;noIPR;noIPR;IPR017907;IPR001841;IPR014001;IPR001650;noIPR;noIPR;noIPR;IPR027417;IPR027417	;;;;GO:0005524/GO:0070615;GO:0046872;;;;;;;;;;;;;;;;;;;;;;
Vitvi10g00077_t001	XP_019077981.1 ATP-dependent helicase rhp16 isoform X1	826	3	0	0.9883	Vitis vinifera	0.9976	2	GO:0005524;GO:0070615		IPR001841;IPR014001;IPR013083;IPR038718;IPR000330;IPR027417;IPR038718;noIPR;noIPR;noIPR;noIPR;noIPR;noIPR;noIPR;IPR017907;IPR001841;IPR014001;noIPR;noIPR;IPR027417;IPR027417;noIPR	;;;;GO:0005524/GO:0070615;;;;;;;;;;;;;;;;;
Vitvi10g00078_t001	XP_002272701.1 aminomethyltransferase, mitochondrial	408	3	8e-303	0.9902	Vitis vinifera	1	8	GO:0000145;GO:0004047;GO:0005515;GO:0005739;GO:0006887;GO:0008483;GO:0019464;GO:0032259	EC:2.6.1;EC:2.1.2.10;EC:2.1.1	IPR006223;IPR013977;noIPR;noIPR;IPR028896;IPR006222;IPR027266;noIPR;noIPR;IPR028896;IPR029043;noIPR	GO:0006546/GO:0004047;;;;;;GO:0005515;;;;;
Vitvi10g04019_t001	RVW46024.1hypothetical protein CK203_068597	124	1	1.7e-77	1	Vitis vinifera	1
Vitvi10g00079_t001	XP_002272746.1PREDICTED: uncharacterized protein LOC100245276 isoform X1	273	2	8.3e-196	0.9963	Vitis vinifera	1				noIPR
Vitvi10g00080_t001	XP_002272817.1 U3 small nucleolar RNA-associated protein 6 homolog	652	2	0	0.9977	Vitis vinifera	1	5	GO:0000462;GO:0005515;GO:0030515;GO:0032040;GO:0034388		noIPR;IPR003107;IPR011990;IPR013949;IPR011990;noIPR;noIPR;noIPR;IPR011990;IPR011990	;GO:0006396;GO:0005515;GO:0000462/GO:0030515;GO:0005515;;;;GO:0005515;GO:0005515
Vitvi10g04020_t001	---NA---	287
Vitvi10g04021_t001	RVX07993.1hypothetical protein CK203_014780	187	1	7.9e-74	0.9915	Vitis vinifera	0.9915	1	GO:0016021
Vitvi10g04022_t001	XP_010647532.1 putative two-component response regulator ARR21	305	1	6.3e-105	0.799	Vitis vinifera	0.799	2	GO:0003677;GO:0003700		noIPR;IPR006447;IPR044848;noIPR;IPR009057	;GO:0003677;GO:0003700;;
Vitvi10g00082_t001	XP_002272880.1 L-ascorbate oxidase homolog	540	2	0	0.9972	Vitis vinifera	1	3	GO:0005507;GO:0009506;GO:0016491	EC:1	IPR008972;IPR008972;IPR011707;IPR008972;IPR011706;IPR001117;noIPR;IPR045087;IPR034275;IPR034271;IPR034273;IPR008972;IPR008972;IPR008972	;;GO:0005507;;GO:0016491/GO:0005507;;;;GO:0005507;;GO:0005507;;;
Vitvi10g00083_t001	XP_034698826.1rhamnogalacturonate lyase-like	632	3	0	0.9984	Vitis vinifera	1	4	GO:0005576;GO:0005975;GO:0030246;GO:0102210	EC:4.2.2.23	IPR029413;IPR014718;noIPR;IPR029411;IPR010325;noIPR;noIPR;noIPR;IPR029413;noIPR;noIPR;IPR011013;IPR008979;IPR013784	;GO:0030246;;;;;;;;;;GO:0003824/GO:0030246/GO:0005975;;GO:0030246
Vitvi10g00084_t001	XP_002268030.2PREDICTED: uncharacterized protein LOC100255468	447	3	0	0.997	Vitis vinifera	1	1	GO:0003824		IPR001876;noIPR;IPR005135;IPR036691;noIPR;noIPR;IPR001876;noIPR;IPR036691;IPR036443	;;GO:0003824;;;;;;;
Vitvi10g00085_t001	XP_003632942.1 glucan endo-1,3-beta-glucosidase 1	525	4	0	0.999	Vitis vinifera	1	2	GO:0005975;GO:0042973	EC:3.2.1.21;EC:3.2.1.39	IPR012946;IPR000490;noIPR;IPR012946;noIPR;IPR044965;noIPR;IPR000490;IPR017853	;GO:0004553/GO:0005975;;;;GO:0004553/GO:0005975;;GO:0004553/GO:0005975;
Vitvi10g00086_t001	XP_003632943.1 5'-adenylylsulfate reductase 3, chloroplastic	460	2	0	0.9957	Vitis vinifera	1	2	GO:0016671;GO:0019419	EC:1.8.4	IPR004508;IPR014729;IPR002500;noIPR;IPR013766;noIPR;noIPR;IPR013766;noIPR;IPR002500;noIPR;IPR036249	GO:0019419/GO:0016671;;GO:0003824;;;;;;;GO:0003824;;
Vitvi10g04023_t001	RVW46046.1Lactoylglutathione lyase GLX1	158	1	6.8e-76	0.7836	Vitis vinifera	0.7836	1	GO:0016829	EC:4
Vitvi10g00087_t001	XP_019078137.1 putative lactoylglutathione lyase isoform X2	292	4	5.5e-215	0.9991	Vitis vinifera	1	2	GO:0004462;GO:0046872	EC:4.4.1.5	IPR004361;IPR029068;IPR004360;IPR029068;noIPR;IPR018146;IPR018146;IPR018146;IPR037523;IPR037523;noIPR;IPR029068;IPR029068	GO:0004462/GO:0046872;;;;;GO:0004462/GO:0046872;GO:0004462/GO:0046872;GO:0004462/GO:0046872;;;;;
Vitvi10g00088_t001	XP_010655388.1 arogenate dehydratase/prephenate dehydratase 1, chloroplastic isoform X1	396	2	6.7e-289	0.9949	Vitis vinifera	1	4	GO:0004664;GO:0009094;GO:0009570;GO:0047769	EC:4.2.1.51;EC:4.2.1.91	noIPR;noIPR;noIPR;IPR001086;noIPR;noIPR;noIPR;noIPR;noIPR;IPR018528;IPR018528;IPR002912;IPR001086;noIPR;noIPR;noIPR;noIPR	;;;GO:0004664/GO:0009094;;;;;;GO:0009094/GO:0004664;GO:0009094/GO:0004664;;GO:0004664/GO:0009094;;;;
Vitvi10g00088_t002	XP_010655389.1 arogenate dehydratase/prephenate dehydratase 1, chloroplastic isoform X2	358	4	6.1e-259	0.9944	Vitis vinifera	1	4	GO:0004664;GO:0009094;GO:0009570;GO:0047769	EC:4.2.1.51;EC:4.2.1.91	IPR001086;noIPR;noIPR;noIPR;noIPR;noIPR;noIPR;noIPR;noIPR;noIPR;IPR018528;IPR018528;IPR001086;IPR002912;noIPR;noIPR;noIPR;noIPR	GO:0004664/GO:0009094;;;;;;;;;;GO:0009094/GO:0004664;GO:0009094/GO:0004664;GO:0004664/GO:0009094;;;;;
Vitvi10g00090_t001	XP_002273433.1 ankyrin repeat domain-containing protein 13C	586	3	0	0.9855	Vitis vinifera	1	3	GO:0005515;GO:0005737;GO:0016020		IPR021832;IPR036770;noIPR;noIPR;noIPR;IPR021832;IPR002110;IPR036770	;;;;;;GO:0005515;
Vitvi10g00091_t001	CAN76497.1hypothetical protein VITISV_001200	84	1	2.6e-28	0.869	Vitis vinifera	0.869				noIPR;noIPR;noIPR;noIPR	;;;
Vitvi10g04024_t001	XP_002273587.1 autophagy-related protein 8C	177	3	2.1e-72	0.9517	Vitis vinifera	0.8978	4	GO:0005874;GO:0006914;GO:0006995;GO:0016020		IPR004241;noIPR;noIPR;IPR004241;noIPR;IPR029071	;;;;;
Vitvi10g00092_t001	XP_010655390.1 probable beta-1,3-galactosyltransferase 2	408	3	3.4e-304	0.9821	Vitis vinifera	1	4	GO:0000139;GO:0006486;GO:0016021;GO:0016758	EC:2.4.1	noIPR;IPR002659;noIPR;IPR025298;noIPR;IPR002659	;GO:0006486/GO:0016758/GO:0016020;;;;GO:0006486/GO:0016758/GO:0016020
Vitvi10g00093_t001	XP_003632958.1PREDICTED: uncharacterized protein LOC100854465	190	2	2.3e-120	0.9947	Vitis vinifera	1				IPR007608;noIPR;noIPR;noIPR;noIPR;noIPR	;;;;;
Vitvi10g00094_t001	XP_002269011.2 starch synthase 3, chloroplastic/amyloplastic	1177	2	0	0.9847	Vitis vinifera	1	2	GO:0004373;GO:2001070	EC:2.4.1.11	noIPR;IPR005085;IPR013783;IPR013534;IPR005085;noIPR;noIPR;noIPR;IPR001296;noIPR;noIPR;noIPR;noIPR;noIPR;noIPR;noIPR;IPR011835;noIPR;noIPR	;GO:2001070;;;GO:2001070;;;;GO:0016757;;;;;;;;GO:0004373;;
Vitvi10g00094_t002	XP_002269011.2 starch synthase 3, chloroplastic/amyloplastic	1177	2	0	0.9847	Vitis vinifera	1	2	GO:0004373;GO:2001070	EC:2.4.1.11	noIPR;IPR005085;IPR013783;IPR013534;IPR005085;noIPR;noIPR;noIPR;IPR001296;noIPR;noIPR;noIPR;noIPR;noIPR;noIPR;noIPR;IPR011835;noIPR;noIPR	;GO:2001070;;;GO:2001070;;;;GO:0016757;;;;;;;;GO:0004373;;
Vitvi10g00094_t003	XP_002269011.2 starch synthase 3, chloroplastic/amyloplastic	1177	2	0	0.9847	Vitis vinifera	1	2	GO:0004373;GO:2001070	EC:2.4.1.11	noIPR;IPR005085;IPR013783;IPR013534;IPR005085;noIPR;noIPR;noIPR;IPR001296;noIPR;noIPR;noIPR;noIPR;noIPR;noIPR;noIPR;IPR011835;noIPR;noIPR	;GO:2001070;;;GO:2001070;;;;GO:0016757;;;;;;;;GO:0004373;;
Vitvi10g00095_t001	XP_002275015.1 ATP synthase gamma chain, chloroplastic	372	3	9e-243	0.9973	Vitis vinifera	1	3	GO:0015986;GO:0045261;GO:0046933	EC:7.1.2.2;EC:6	noIPR;IPR000131;IPR000131;noIPR;noIPR;IPR000131;noIPR;IPR000131;IPR023632;IPR000131;IPR000131;IPR035968	;GO:0045261/GO:0015986/GO:0046933;GO:0045261/GO:0015986/GO:0046933;;;GO:0045261/GO:0015986/GO:0046933;;GO:0045261/GO:0015986/GO:0046933;;GO:0045261/GO:0015986/GO:0046933;GO:0045261/GO:0015986/GO:0046933;GO:0045261/GO:0015986/GO:0046933
Vitvi10g00096_t001	XP_002268966.1PREDICTED: uncharacterized protein LOC100247051 isoform X1	1514	4	0	0.9828	Vitis vinifera	0.9993	3	GO:0015986;GO:0045261;GO:0046933	EC:7.1.2.2;EC:6	noIPR;noIPR;noIPR;noIPR;noIPR;noIPR;noIPR;noIPR;noIPR;noIPR;noIPR;noIPR;noIPR;noIPR;noIPR;noIPR;IPR000131;noIPR;IPR009057	;;;;;;;;;;;;;;;;GO:0045261/GO:0015986/GO:0046933;;
Vitvi10g00096_t002	XP_010655394.1PREDICTED: uncharacterized protein LOC100247051 isoform X2	1487	4	0	0.9828	Vitis vinifera	0.9993	3	GO:0015986;GO:0045261;GO:0046933	EC:7.1.2.2;EC:6	noIPR;noIPR;noIPR;noIPR;noIPR;noIPR;noIPR;noIPR;noIPR;noIPR;noIPR;noIPR;noIPR;IPR000131;IPR009057	;;;;;;;;;;;;;GO:0045261/GO:0015986/GO:0046933;
Vitvi10g00096_t003	XP_002268966.1PREDICTED: uncharacterized protein LOC100247051 isoform X1	1514	4	0	0.9828	Vitis vinifera	0.9993	3	GO:0015986;GO:0045261;GO:0046933	EC:7.1.2.2;EC:6	noIPR;noIPR;noIPR;noIPR;noIPR;noIPR;noIPR;noIPR;noIPR;noIPR;noIPR;noIPR;noIPR;noIPR;noIPR;noIPR;IPR000131;noIPR;IPR009057	;;;;;;;;;;;;;;;;GO:0045261/GO:0015986/GO:0046933;;
Vitvi10g04025_t001	RVW32613.1Cytochrome P450 87A3	87	1	3.2e-14	0.9302	Vitis vinifera	0.9302	4	GO:0004497;GO:0005506;GO:0016705;GO:0020037	EC:1.14	noIPR;noIPR	;
Vitvi10g01641_t001	XP_010655396.1 MYB-like transcription factor ETC3	86	2	6.7e-50	0.9942	Vitis vinifera/Vitis riparia	1	3	GO:0000976;GO:0005634;GO:0030154		IPR001005;IPR017930;noIPR;noIPR;noIPR;noIPR;noIPR;IPR001005;IPR001005;IPR009057	;;;;;;;;;
Vitvi10g00098_t001	XP_010655398.1 tRNA wybutosine-synthesizing protein 2/3/4 isoform X1	1042	3	0	0.9846	Vitis vinifera	1	5	GO:0005515;GO:0005737;GO:0008175;GO:0030488;GO:0102522	EC:2.5.1.114;EC:2.1.1	IPR015915;IPR030382;IPR003827;noIPR;IPR015915;IPR036602;noIPR;IPR011498;IPR006652;noIPR;noIPR;noIPR;noIPR;IPR030382;noIPR;IPR036602;IPR015915;IPR029063	GO:0005515;;;;GO:0005515;;;GO:0005515;GO:0005515;;;;;;;;GO:0005515;
Vitvi10g00100_t001	XP_002274769.1 peroxidase 42	334	3	2e-245	0.996	Vitis vinifera	1	9	GO:0004601;GO:0005576;GO:0006979;GO:0009505;GO:0009506;GO:0020037;GO:0042744;GO:0046872;GO:0098869	EC:1.11.1	IPR000823;IPR002016;IPR002016;noIPR;noIPR;noIPR;noIPR;noIPR;IPR002016;IPR033905;IPR010255	GO:0020037/GO:0004601/GO:0006979;GO:0020037/GO:0004601/GO:0006979;GO:0020037/GO:0004601/GO:0006979;;;;;;GO:0020037/GO:0004601/GO:0006979;GO:0004601/GO:0042744;GO:0020037/GO:0004601/GO:0006979
Vitvi10g00101_t001	XP_010655401.1PREDICTED: uncharacterized protein LOC104880466 isoform X1	741	3	0	0.9978	Vitis vinifera	1				noIPR;noIPR;noIPR;noIPR;noIPR;noIPR;noIPR	;;;;;;
Vitvi10g00102_t001	XP_002268814.1 calcium-dependent protein kinase 2	545	4	0	0.9821	Vitis vinifera	1	10	GO:0004683;GO:0005509;GO:0005516;GO:0005524;GO:0005634;GO:0005737;GO:0009931;GO:0018105;GO:0035556;GO:0046777	EC:2.7.11.17	IPR002048;IPR000719;noIPR;noIPR;IPR002048;noIPR;IPR000719;noIPR;noIPR;noIPR;noIPR;noIPR;noIPR;IPR018247;IPR017441;IPR018247;IPR008271;IPR018247;IPR018247;IPR002048;IPR000719;IPR002048;IPR002048;IPR002048;noIPR;IPR011992;IPR011009	GO:0005509;GO:0005524/GO:0004672/GO:0006468;;;GO:0005509;;GO:0005524/GO:0004672/GO:0006468;;;;;;;;GO:0005524;;GO:0004672/GO:0006468;;;GO:0005509;GO:0005524/GO:0004672/GO:0006468;GO:0005509;GO:0005509;GO:0005509;;;
Vitvi10g01642_t001	XP_003632945.1PREDICTED: uncharacterized protein LOC100855186	213	1	4.3e-141	1	Vitis vinifera	1				IPR007608;noIPR;noIPR;noIPR	;;;
Vitvi10g00105_t001	XP_010655404.1PREDICTED: putative uncharacterized protein MYH16	710	4	0	0.9899	Vitis vinifera	1				noIPR;noIPR;noIPR;noIPR;noIPR;noIPR;IPR043424;noIPR	;;;;;;;
Vitvi10g01643_t001	XP_010655405.1PREDICTED: uncharacterized protein LOC104880467	125	1	6.4e-82	0.992	Vitis vinifera	0.992				noIPR;noIPR;noIPR	;;
Vitvi10g00106_t001	XP_010655406.1 uncharacterized GPI-anchored protein At1g61900	456	2	0	0.9967	Vitis vinifera	1				IPR043891;noIPR;IPR040336	;;
Vitvi10g00107_t001	XP_002274027.2 protein DETOXIFICATION 40	504	2	0	1	Vitis vinifera	1	4	GO:0015297;GO:0016021;GO:0042910;GO:1990961	EC:7	IPR002528;IPR002528;noIPR;noIPR;IPR045069	GO:0016020/GO:0015297/GO:0055085/GO:0042910;GO:0016020/GO:0015297/GO:0055085/GO:0042910;;;GO:1990961/GO:0042910
Vitvi10g00109_t001	XP_002273901.2 protein DETOXIFICATION 40	508	2	0	0.9882	Vitis vinifera	1	4	GO:0015297;GO:0016020;GO:0042910;GO:1990961	EC:7	noIPR;IPR002528;IPR002528;noIPR;noIPR;IPR045069	;GO:0016020/GO:0015297/GO:0055085/GO:0042910;GO:0016020/GO:0015297/GO:0055085/GO:0042910;;;GO:1990961/GO:0042910
Vitvi10g01644_t001	XP_002273739.2 protein DETOXIFICATION 40	509	3	0	0.9711	Vitis vinifera	1	4	GO:0015297;GO:0016021;GO:0042910;GO:1990961	EC:7	noIPR;IPR002528;IPR002528;noIPR;noIPR;IPR045069	;GO:0016020/GO:0015297/GO:0055085/GO:0042910;GO:0016020/GO:0015297/GO:0055085/GO:0042910;;;GO:1990961/GO:0042910
Vitvi10g00110_t001	RVW45901.1hypothetical protein CK203_068549	110	2	2.3e-68	0.9955	Vitis vinifera	1				noIPR;noIPR	;
Vitvi10g00111_t001	XP_002272917.1 UPF0051 protein ABCI8, chloroplastic	554	3	0	0.9976	Vitis vinifera	1	1	GO:0016226		IPR000825;IPR010231;noIPR;noIPR;noIPR;noIPR;IPR037284	GO:0016226;GO:0016226;;;;;
Vitvi10g04026_t001	CBI23509.3unnamed protein product, partial	82	1	2.6e-43	1	Vitis vinifera	1				IPR007599;noIPR;noIPR;IPR035952	;;;
Vitvi10g04027_t001	CAN64626.1hypothetical protein VITISV_039430	81	1	4.8e-40	0.9048	Vitis vinifera	0.9048	1	GO:0016021
Vitvi10g04028_t001	CBI18768.3unnamed protein product, partial	252	1	1.9e-173	1	Vitis vinifera	1				IPR026961;noIPR;noIPR	;;
Vitvi10g04029_t001	XP_010646982.1PREDICTED: uncharacterized protein LOC104878396 isoform X1	415	1	1.4e-304	1	Vitis vinifera	1	1	GO:0005515		IPR002110;IPR020683;IPR036770;noIPR;noIPR;noIPR;IPR036770	GO:0005515;;;;;;
Vitvi10g02102_t001	XP_034698385.1uncharacterized protein LOC117923968	396	6	1.3e-245	0.9184	Vitis riparia	0.938	2	GO:0005515;GO:0016021		IPR002110;IPR036770;IPR020683;IPR036770;noIPR;noIPR;noIPR;noIPR;noIPR;IPR036770	GO:0005515;;;;;;;;;
Vitvi10g02101_t001	XP_010646604.1 ankyrin repeat-containing protein At5g02620 isoform X1	296	7	2.8e-201	0.9908	Vitis vinifera	0.9966	1	GO:0016021		IPR026961;noIPR;noIPR;noIPR	;;;
Vitvi10g04030_t001	RVX07932.1Ankyrin repeat-containing protein ITN1	176	8	3.2e-113	0.9792	Vitis vinifera	1	1	GO:0016021		IPR036770;noIPR;noIPR;IPR036770	;;;
Vitvi10g04031_t001	---NA---	124
Vitvi10g02099_t001	CBI18738.3unnamed protein product, partial	85	1	6.4e-61	1	Vitis vinifera	1
Vitvi10g02097_t001	XP_019073796.1 transcription factor bHLH121-like	181	1	4.6e-81	0.9944	Vitis vinifera	0.9944	3	GO:0003700;GO:0046983;GO:0055072		noIPR;IPR011598;IPR011598;IPR036638;noIPR;noIPR;IPR044579;IPR011598;noIPR;IPR036638	;GO:0046983;GO:0046983;GO:0046983;;;GO:0003700/GO:0055072;GO:0046983;;GO:0046983
Vitvi10g04032_t001	CAN77611.1hypothetical protein VITISV_039464	66	2	2.8e-40	1	Vitis vinifera	1
Vitvi10g04033_t001	CAN65369.1hypothetical protein VITISV_021975	89	1	3.5e-10	0.7273	Vitis vinifera	0.7273	3	GO:0006810;GO:0009507;GO:0016020		noIPR;noIPR	;
Vitvi10g04034_t011	XP_019073797.1PREDICTED: uncharacterized protein LOC100256611 isoform X1	393	5	3.8e-284	0.9908	Vitis vinifera	1	2	GO:0005515;GO:0016020		IPR002110;IPR036770;IPR020683;IPR036770;noIPR;noIPR;noIPR;noIPR;IPR036770;IPR036770	GO:0005515;;;;;;;;;
Vitvi10g04034_t001	CBI18733.3unnamed protein product, partial	468	2	0	0.9957	Vitis vinifera	0.9957	1	GO:0005515		IPR002110;IPR036770;IPR026961;IPR020683;IPR036770;noIPR;noIPR;noIPR;noIPR;IPR036770;IPR036770	GO:0005515;;;;;;;;;;
Vitvi10g04034_t003	RVW45973.1Ankyrin repeat-containing protein ITN1	601	3	0	0.9491	Vitis vinifera	0.99	2	GO:0005515;GO:0016021		IPR002110;IPR026961;IPR020683;IPR036770;IPR036770;noIPR;noIPR;IPR036770;IPR036770	GO:0005515;;;;;;;;
Vitvi10g04034_t005	RVX07878.1Ankyrin repeat-containing protein ITN1	494	3	0	0.9945	Vitis vinifera	0.9857	1	GO:0016021		IPR026961;IPR036770;IPR020683;noIPR;noIPR;noIPR;noIPR;IPR036770	;;;;;;;
Vitvi10g04034_t007	CBI18733.3unnamed protein product, partial	361	2	6.5e-242	0.9971	Vitis vinifera	0.9971				IPR020683;IPR026961;IPR036770;noIPR;noIPR;noIPR;noIPR;IPR036770	;;;;;;;
Vitvi10g04034_t010	XP_019073797.1PREDICTED: uncharacterized protein LOC100256611 isoform X1	393	5	3.8e-284	0.9908	Vitis vinifera	1	2	GO:0005515;GO:0016020		IPR002110;IPR036770;IPR020683;IPR036770;noIPR;noIPR;noIPR;noIPR;IPR036770;IPR036770	GO:0005515;;;;;;;;;
Vitvi10g04034_t002	CBI18733.3unnamed protein product, partial	569	2	0	1	Vitis vinifera	1	1	GO:0005515		IPR002110;IPR036770;IPR026961;IPR036770;IPR020683;noIPR;noIPR;noIPR;noIPR;noIPR;noIPR;IPR036770;IPR036770	GO:0005515;;;;;;;;;;;;
Vitvi10g04034_t004	XP_002266101.2PREDICTED: uncharacterized protein LOC100245282 isoform X1	702	1	0	1	Vitis vinifera	1	1	GO:0005515		IPR002110;IPR020683;IPR036770;IPR026961;IPR036770;noIPR;noIPR;noIPR;noIPR;IPR036770;IPR036770	GO:0005515;;;;;;;;;;
Vitvi10g04034_t006	RVX07878.1Ankyrin repeat-containing protein ITN1	494	3	0	0.9945	Vitis vinifera	0.9857	1	GO:0016021		IPR026961;IPR036770;IPR020683;noIPR;noIPR;noIPR;noIPR;IPR036770	;;;;;;;
Vitvi10g04034_t008	CBI18733.3unnamed protein product, partial	361	2	6.5e-242	0.9971	Vitis vinifera	0.9971				IPR020683;IPR026961;IPR036770;noIPR;noIPR;noIPR;noIPR;IPR036770	;;;;;;;
Vitvi10g04034_t009	XP_002266101.2PREDICTED: uncharacterized protein LOC100245282 isoform X1	474	4	0	0.9802	Vitis vinifera	0.9829	1	GO:0005515		IPR002110;IPR020683;IPR036770;IPR036770;noIPR;noIPR;noIPR;noIPR;noIPR;IPR036770;IPR036770	GO:0005515;;;;;;;;;;
Vitvi10g02089_t001	XP_010646599.1PREDICTED: uncharacterized protein LOC100853163 isoform X1	715	1	0	1	Vitis vinifera	1	1	GO:0005515		noIPR;IPR002110;IPR020683;IPR036770;IPR036770;IPR026961;noIPR;noIPR;noIPR;noIPR;noIPR;IPR036770;IPR036770	;GO:0005515;;;;;;;;;;;
Vitvi10g04035_t001	RVW45897.1hypothetical protein CK203_068516	308	1	1.8e-193	0.8962	Vitis vinifera	0.8962				IPR036770;noIPR;noIPR;noIPR;noIPR;IPR036770	;;;;;
Vitvi10g04036_t001	RVW45898.1hypothetical protein CK203_068517	296	1	2e-203	1	Vitis vinifera	1	1	GO:0016021		IPR026961;noIPR;noIPR	;;
Vitvi10g04037_t001	CBI18738.3unnamed protein product, partial	91	1	8e-41	0.9275	Vitis vinifera	0.9275
Vitvi10g00130_t001	XP_034698867.1probable transcription repressor OFP9	155	1	4.6e-103	0.9935	Vitis riparia/Vitis vinifera	0.9935	1	GO:0045892		IPR006458;IPR006458;noIPR;IPR038933;IPR006458	;;;GO:0045892;
Vitvi10g00129_t001	XP_002269934.2 pyrophosphate--fructose 6-phosphate 1-phosphotransferase subunit beta	565	2	0	0.9938	Vitis vinifera	0.9982	10	GO:0003872;GO:0005524;GO:0005829;GO:0006002;GO:0009749;GO:0015979;GO:0046835;GO:0046872;GO:0047334;GO:0061615	EC:2.7.1.90;EC:2.7.1.11	IPR022953;IPR011183;IPR035966;IPR011183;noIPR;noIPR;IPR000023;noIPR;noIPR;IPR011183;IPR035966	GO:0003872/GO:0006002/GO:0006096;GO:0005524/GO:0047334/GO:0006096;GO:0003872/GO:0006096;GO:0005524/GO:0047334/GO:0006096;;;GO:0003872/GO:0006096;;;GO:0005524/GO:0047334/GO:0006096;GO:0003872/GO:0006096
Vitvi10g00128_t001	XP_034697067.1translation initiation factor IF-2	340	3	7.2e-210	0.9853	Vitis vinifera	1				noIPR;noIPR;noIPR;noIPR;noIPR;noIPR;noIPR;noIPR;noIPR;noIPR	;;;;;;;;;
Vitvi10g00127_t001	XP_002267342.2 katanin p60 ATPase-containing subunit A1	596	2	0	0.9958	Vitis vinifera	1	6	GO:0005524;GO:0008540;GO:0016887;GO:0030433;GO:0031597;GO:0045899		noIPR;IPR003593;IPR027417;noIPR;IPR003959;noIPR;noIPR;noIPR;noIPR;IPR003960;noIPR;IPR027417	;;;;GO:0016887/GO:0005524;;;;;GO:0016887/GO:0005524;;
Vitvi10g00127_t002	XP_002267342.2 katanin p60 ATPase-containing subunit A1	470	3	0	0.9936	Vitis vinifera	1	7	GO:0005524;GO:0008540;GO:0016887;GO:0030433;GO:0031597;GO:0045899;GO:0051301		IPR003593;IPR027417;IPR003959;noIPR;noIPR;noIPR;IPR003960;noIPR;IPR027417	;;GO:0016887/GO:0005524;;;;GO:0016887/GO:0005524;;
Vitvi10g01647_t001	XP_003634854.1PREDICTED: uncharacterized protein At4g22160	163	3	2.9e-103	1	Vitis vinifera/Vitis riparia	1				noIPR;noIPR;noIPR;noIPR	;;;
Vitvi10g00125_t001	XP_002272066.1 plant UBX domain-containing protein 4	299	2	4.7e-215	0.9967	Vitis vinifera	1	8	GO:0000045;GO:0005634;GO:0005829;GO:0007030;GO:0031468;GO:0043130;GO:0043161;GO:0061025		IPR012989;IPR001012;IPR012989;IPR001012;IPR036241;noIPR;noIPR;noIPR;noIPR;noIPR;noIPR;IPR012989;IPR001012;noIPR;IPR036241;IPR029071	;GO:0005515;;GO:0005515;;;;;;;;;GO:0005515;;;
Vitvi10g00124_t001	XP_002271944.1 homeobox protein SBH1	361	1	1.5e-233	1	Vitis vinifera/Vitis riparia	1	4	GO:0000981;GO:0003677;GO:0005634;GO:0006355		IPR005539;IPR005541;IPR001356;IPR005540;IPR008422;noIPR;IPR005540;IPR005541;IPR005539;noIPR;noIPR;IPR017970;IPR001356;IPR005539;IPR001356;IPR009057	GO:0003677;GO:0005634/GO:0003677;GO:0003677;GO:0005634/GO:0003677;GO:0003677/GO:0006355;;GO:0005634/GO:0003677;GO:0005634/GO:0003677;GO:0003677;;;GO:0000981/GO:0006355;GO:0003677;GO:0003677;GO:0003677;
Vitvi10g00123_t001	XP_034697054.150S ribosomal protein L4	315	2	6.9e-216	0.9984	Vitis vinifera	1	3	GO:0003735;GO:0005840;GO:0006412		IPR013005;IPR023574;IPR002136;noIPR;IPR013005;IPR013005;IPR023574	;GO:0006412/GO:0005840/GO:0003735;GO:0006412/GO:0005840/GO:0003735;;;;GO:0006412/GO:0005840/GO:0003735
Vitvi10g00123_t002	XP_034697054.150S ribosomal protein L4	315	2	6.9e-216	0.9984	Vitis vinifera	1	3	GO:0003735;GO:0005840;GO:0006412		IPR013005;IPR023574;IPR002136;noIPR;IPR013005;IPR013005;IPR023574	;GO:0006412/GO:0005840/GO:0003735;GO:0006412/GO:0005840/GO:0003735;;;;GO:0006412/GO:0005840/GO:0003735
Vitvi10g00122_t001	XP_003634849.1 chromatin remodeling protein EBS	215	4	3.7e-161	1	Vitis vinifera/Vitis riparia	1	6	GO:0003682;GO:0003735;GO:0005840;GO:0006325;GO:0006412;GO:0046872		IPR001025;IPR001965;IPR001025;IPR013083;IPR043151;IPR019787;noIPR;noIPR;noIPR;IPR019786;IPR019787;IPR001025;IPR011011	GO:0003682;;GO:0003682;;;;;;;;;GO:0003682;
Vitvi10g00121_t001	XP_002267221.2 subtilisin-like protease SBT2.4	822	3	0	0.9854	Vitis vinifera	0.9988	3	GO:0004252;GO:0006508;GO:0090558	EC:3.4.21	IPR015500;IPR036852;IPR041469;IPR000209;IPR010259;noIPR;noIPR;IPR037045;IPR045051;noIPR;IPR023827;IPR022398;IPR023828;noIPR;noIPR;IPR034197;IPR036852	;GO:0004252/GO:0006508;;GO:0008236/GO:0006508;;;;;;;;;;;;;GO:0004252/GO:0006508
Vitvi10g00120_t001	RVX08119.1O-fucosyltransferase 15	617	5	0	0.9731	Vitis vinifera	1	3	GO:0006004;GO:0016021;GO:0016757	EC:2.4	IPR024709;IPR019378;noIPR;noIPR;noIPR;noIPR;IPR024709	;;;;;;
Vitvi10g04038_t001	RVW45993.1hypothetical protein CK203_068533	115	1	1.2e-66	0.9911	Vitis vinifera	0.9911				IPR000477;noIPR;noIPR	;;
Vitvi10g00119_t002	XP_002267170.2 protein STRUBBELIG-RECEPTOR FAMILY 8	729	3	0	0.9685	Vitis vinifera	1	6	GO:0004672;GO:0005515;GO:0005524;GO:0005886;GO:0006468;GO:0016021	EC:2.7.1	IPR032675;IPR001245;IPR013210;noIPR;noIPR;IPR001611;noIPR;noIPR;noIPR;noIPR;IPR000719;IPR001611;noIPR;noIPR;IPR011009	;GO:0004672/GO:0006468;;;;GO:0005515;;;;;GO:0005524/GO:0004672/GO:0006468;GO:0005515;;;
Vitvi10g00119_t001	XP_002267170.2 protein STRUBBELIG-RECEPTOR FAMILY 8	729	3	0	0.9685	Vitis vinifera	1	6	GO:0004672;GO:0005515;GO:0005524;GO:0005886;GO:0006468;GO:0016021	EC:2.7.1	IPR032675;IPR001245;IPR013210;noIPR;noIPR;IPR001611;noIPR;noIPR;noIPR;noIPR;IPR000719;IPR001611;noIPR;noIPR;IPR011009	;GO:0004672/GO:0006468;;;;GO:0005515;;;;;GO:0005524/GO:0004672/GO:0006468;GO:0005515;;;
Vitvi10g00119_t003	XP_002267170.2 protein STRUBBELIG-RECEPTOR FAMILY 8	729	3	0	0.9672	Vitis vinifera	0.9986	6	GO:0004672;GO:0005515;GO:0005524;GO:0005886;GO:0006468;GO:0016021	EC:2.7.1	IPR001245;IPR013210;IPR032675;noIPR;noIPR;IPR001611;noIPR;noIPR;noIPR;noIPR;IPR000719;IPR001611;noIPR;noIPR;IPR011009	GO:0004672/GO:0006468;;;;;GO:0005515;;;;;GO:0005524/GO:0004672/GO:0006468;GO:0005515;;;
Vitvi10g00117_t001	XP_003634851.2 pentatricopeptide repeat-containing protein At1g61870, mitochondrial	396	5	2.3e-148	0.9551	Vitis vinifera	1	1	GO:0005515		IPR011990;IPR011990;IPR002885;IPR002885;IPR011990;IPR002885;IPR002885;noIPR;noIPR;IPR002885;IPR002885;IPR002885;IPR002885;IPR011990	GO:0005515;GO:0005515;;;GO:0005515;;;;;;;;;GO:0005515
Vitvi10g00116_t001	XP_002271487.1 tobamovirus multiplication protein 1	289	1	2.8e-202	1	Vitis vinifera/Vitis riparia	1				IPR009457;noIPR;IPR040226	;;
Vitvi10g04039_t001	XP_002271379.3 derlin-2.2	183	2	8.5e-125	0.9917	Vitis vinifera	1	2	GO:0005789;GO:0016021		IPR007599;noIPR;noIPR;IPR035952	;;;
Vitvi10g01650_t001	XP_002266981.2 cytochrome P450 716B1	480	5	0	0.9842	Vitis vinifera	0.9979	5	GO:0004497;GO:0005506;GO:0016125;GO:0016705;GO:0020037	EC:1.14	IPR002401;IPR001128;IPR036396;IPR001128;noIPR;noIPR;noIPR;IPR017972;IPR036396	GO:0020037/GO:0005506/GO:0004497/GO:0016705;GO:0020037/GO:0005506/GO:0004497/GO:0016705;GO:0020037/GO:0005506/GO:0004497/GO:0016705;GO:0020037/GO:0005506/GO:0004497/GO:0016705;;;;GO:0005506/GO:0016705;GO:0020037/GO:0005506/GO:0004497/GO:0016705
Vitvi10g00131_t001	XP_010647302.1 abnormal spindle-like microcephaly-associated protein homolog	1418	3	0	0.9495	Vitis vinifera	0.9697	1	GO:0005515		noIPR;IPR000048;IPR000225;IPR001715;IPR036872;IPR011989;IPR000048;noIPR;IPR036872;noIPR;noIPR;noIPR;noIPR;noIPR;noIPR;noIPR;IPR000225;IPR001715;IPR000048;IPR000048;IPR000048;IPR000048;IPR000048;IPR000048;IPR000048;IPR000048;IPR000048;IPR000048;IPR036872;IPR016024;IPR027417;IPR027417;IPR027417;IPR027417	;GO:0005515;GO:0005515;GO:0005515;;;GO:0005515;;;;;;;;;;GO:0005515;GO:0005515;GO:0005515;GO:0005515;GO:0005515;GO:0005515;GO:0005515;GO:0005515;GO:0005515;GO:0005515;GO:0005515;GO:0005515;;;;;;
Vitvi10g00134_t001	XP_002271195.1 15.4 kDa class V heat shock protein	136	4	4.5e-94	0.9982	Vitis vinifera	1	7	GO:0006457;GO:0009408;GO:0009651;GO:0042542;GO:0043621;GO:0051082;GO:0051259		IPR002068;IPR008978;noIPR;IPR031107;IPR002068;IPR008978	;;;;;
Vitvi10g04040_t001	XP_002266891.1 zinc finger MYND domain-containing protein 15	633	3	0	0.9989	Vitis vinifera	1				noIPR;IPR002893;noIPR;noIPR;noIPR;noIPR;IPR002893;IPR002893;noIPR	;;;;;;;;
Vitvi10g04041_t001	XP_034697610.1polyadenylate-binding protein RBP45-like isoform X1	395	1	1.8e-253	0.9892	Vitis riparia	0.9892	1	GO:0003676		IPR000504;IPR012677;IPR012677;IPR012677;IPR000504;noIPR;noIPR;noIPR;noIPR;noIPR;noIPR;noIPR;noIPR;IPR000504;IPR000504;IPR000504;noIPR;noIPR;noIPR;IPR035979;IPR035979;IPR035979	GO:0003676;;;;GO:0003676;;;;;;;;;GO:0003676;GO:0003676;GO:0003676;;;;GO:0003676;GO:0003676;GO:0003676
Vitvi10g04042_t001	XP_034697612.1mediator of RNA polymerase II transcription subunit 21	196	1	4.6e-85	0.9928	Vitis riparia	0.9928	1	GO:0016592		noIPR;IPR021384;noIPR;IPR021384;IPR037212	;;;;GO:0016592
Vitvi10g04043_t001	XP_034697007.1uncharacterized protein LOC117922906	725	1	0	0.9835	Vitis riparia	0.9835				noIPR;noIPR;noIPR;noIPR;noIPR;noIPR;noIPR;noIPR;noIPR;noIPR	;;;;;;;;;
Vitvi10g04044_t001	RVW45908.1UPF0051 protein ABCI8, chloroplastic	511	2	0	0.984	Vitis vinifera	0.9863	1	GO:0016226		IPR000825;IPR010231;noIPR;noIPR;noIPR;noIPR;noIPR;IPR037284	GO:0016226;GO:0016226;;;;;;
Vitvi10g01662_t001	XP_019073986.1 RPM1-interacting protein 4	237	1	1.5e-143	0.9952	Vitis vinifera	0.9952				IPR008700;noIPR;noIPR;noIPR;noIPR;noIPR;noIPR;noIPR;IPR040387	;;;;;;;;
Vitvi10g04045_t001	XP_003635309.1 non-specific lipid-transfer protein-like	117	3	5.4e-77	1	Vitis vinifera	1	4	GO:0005576;GO:0006869;GO:0008289;GO:0016020		IPR000528;IPR016140;IPR016140;IPR036312;noIPR;IPR000528;IPR000528;noIPR;IPR036312	GO:0006869/GO:0008289;;;;;GO:0006869/GO:0008289;GO:0006869/GO:0008289;;
Vitvi10g04046_t001	XP_010646961.1 non-specific lipid-transfer protein P3-like	117	3	1.6e-78	1	Vitis vinifera	1	2	GO:0006869;GO:0008289		IPR000528;IPR016140;IPR036312;IPR000528;noIPR;noIPR;IPR036312	GO:0006869/GO:0008289;;;GO:0006869/GO:0008289;;;
Vitvi10g01655_t001	XP_003632960.2PREDICTED: uncharacterized protein LOC100854830	434	2	3.5e-308	0.9965	Vitis vinifera	1				IPR021924;IPR021924;noIPR	;;
Vitvi10g00154_t001	XP_034697051.1ubiquinol oxidase 4, chloroplastic/chromoplastic-like	349	2	9.6e-256	1	Vitis riparia	1	1	GO:0009916	EC:1.10.3	noIPR;IPR038659;IPR002680;noIPR;noIPR;IPR002680;IPR002680	;;GO:0009916;;;GO:0009916;GO:0009916
Vitvi10g00136_t001	XP_002270330.2 E3 ubiquitin-protein ligase COP1	687	3	0	0.9942	Vitis vinifera	0.9971	3	GO:0005515;GO:0016567;GO:0061630	EC:2	noIPR;IPR001680;IPR001841;IPR001680;IPR015943;noIPR;IPR013083;noIPR;noIPR;noIPR;noIPR;IPR042755;noIPR;IPR017907;IPR019775;IPR001680;IPR001841;noIPR;IPR001680;noIPR;noIPR;IPR036322	;GO:0005515;;GO:0005515;GO:0005515;;;;;;;GO:0061630;;;;GO:0005515;;;GO:0005515;;;GO:0005515
Vitvi10g00136_t002	XP_002270330.2 E3 ubiquitin-protein ligase COP1	531	8	0	0.9962	Vitis vinifera	0.9981	3	GO:0005515;GO:0016567;GO:0061630	EC:2	IPR020472;IPR001680;IPR015943;IPR001680;noIPR;noIPR;IPR042755;noIPR;IPR019775;noIPR;IPR001680;IPR001680;IPR036322	;GO:0005515;GO:0005515;GO:0005515;;;GO:0061630;;;;GO:0005515;GO:0005515;GO:0005515
Vitvi10g00136_t003	RVX08031.1E3 ubiquitin-protein ligase COP1	392	6	1.6e-251	0.9949	Vitis vinifera	0.9945	3	GO:0005515;GO:0016567;GO:0061630	EC:2	noIPR;IPR001680;IPR015943;noIPR;noIPR;noIPR;IPR042755;IPR036322	;GO:0005515;GO:0005515;;;;GO:0061630;GO:0005515
Vitvi10g00136_t004	RVX08031.1E3 ubiquitin-protein ligase COP1	576	6	0	0.9966	Vitis vinifera	0.9964	3	GO:0005515;GO:0016567;GO:0061630	EC:2	noIPR;IPR020472;IPR001680;IPR015943;IPR001680;noIPR;noIPR;IPR042755;noIPR;IPR019775;noIPR;IPR001680;IPR001680;IPR036322	;;GO:0005515;GO:0005515;GO:0005515;;;GO:0061630;;;;GO:0005515;GO:0005515;GO:0005515
Vitvi10g00138_t001	XP_002273080.2 probable tyrosine-protein phosphatase At1g05000 isoform X2	210	4	3.3e-157	0.9833	Vitis vinifera	1	4	GO:0004725;GO:0005737;GO:0008138;GO:0035335	EC:3.1.3.48	IPR020428;IPR004861;IPR029021;noIPR;noIPR;IPR016130;IPR020422;noIPR;IPR029021	GO:0016791;;;;;GO:0016311/GO:0004725;GO:0008138/GO:0006470;;
Vitvi10g00138_t002	XP_002273080.2 probable tyrosine-protein phosphatase At1g05000 isoform X2	172	4	6.7e-106	0.9077	Vitis vinifera	0.9286	3	GO:0004725;GO:0005737;GO:0035335	EC:3.1.3.48	IPR020428;IPR029021;IPR004861;noIPR;noIPR;IPR029021	GO:0016791;;;;;
Vitvi10g04047_t001	RVW18825.1Protein CLMP1	131	1	3e-68	0.9815	Vitis vinifera	0.9815
Vitvi10g04048_t001	XP_034697629.1protein CLMP1-like	832	2	0	0.9981	Vitis riparia	0.9987	1	GO:0005515		noIPR;IPR019734;IPR000270;noIPR;IPR011990;IPR000270;noIPR;noIPR;noIPR;noIPR;noIPR;noIPR;noIPR;IPR044517;noIPR;IPR019734;IPR019734;IPR000270;noIPR;IPR011990;noIPR	;GO:0005515;GO:0005515;;GO:0005515;GO:0005515;;;;;;;;;;GO:0005515;GO:0005515;GO:0005515;;GO:0005515;
Vitvi10g04049_t001	XP_034697630.11-aminocyclopropane-1-carboxylate oxidase	318	3	9e-234	0.985	Vitis riparia	1	2	GO:0016491;GO:0046872	EC:1	IPR027443;IPR044861;IPR026992;noIPR;noIPR;IPR005123;noIPR	;;;;;;
Vitvi10g04050_t001	RVW18818.1hypothetical protein CK203_098377	230	2	5.3e-148	0.9652	Vitis vinifera	0.9957				IPR001841;IPR013083;noIPR;noIPR;noIPR;IPR001841;noIPR;noIPR	;;;;;;;
Vitvi10g04051_t001	RVW18819.1Plastid-lipid-associated protein, chloroplastic	322	3	1.6e-220	0.9959	Vitis vinifera	0.9969				IPR006843;IPR039633;noIPR	;;
Vitvi10g04052_t001	XP_034697720.1uncharacterized protein LOC117923508 isoform X1	678	2	0	0.9705	Vitis riparia	0.9853	1	GO:0005515		IPR002110;IPR036770;IPR020683;IPR026961;IPR036770;noIPR;noIPR;noIPR;noIPR;IPR036770	GO:0005515;;;;;;;;;
Vitvi10g04053_t001	XP_034698527.1uncharacterized protein LOC117924082 isoform X1	696	1	0	0.9756	Vitis riparia	0.9756	1	GO:0005515		IPR002110;IPR036770;IPR036770;IPR026961;noIPR;noIPR;noIPR;noIPR;IPR036770	GO:0005515;;;;;;;;
Vitvi10g04053_t002	XP_034698527.1uncharacterized protein LOC117924082 isoform X1	696	1	0	0.9756	Vitis riparia	0.9756	1	GO:0005515		IPR002110;IPR036770;IPR036770;IPR026961;noIPR;noIPR;noIPR;noIPR;IPR036770	GO:0005515;;;;;;;;
Vitvi10g04053_t003	XP_034698528.1uncharacterized protein LOC117924082 isoform X2	359	3	4.6e-236	0.9768	Vitis riparia	0.9666	1	GO:0016021		IPR026961;IPR036770;noIPR;noIPR;IPR036770	;;;;
Vitvi10g04053_t004	XP_034698528.1uncharacterized protein LOC117924082 isoform X2	359	3	4.6e-236	0.9768	Vitis riparia	0.9666	1	GO:0016021		IPR026961;IPR036770;noIPR;noIPR;IPR036770	;;;;
Vitvi10g04054_t001	RVW18815.1Ankyrin repeat-containing protein ITN1	749	1	3.5e-263	0.9608	Vitis vinifera	0.9608	2	GO:0005515;GO:0016021		IPR002110;IPR036770;IPR026961;IPR020683;IPR036770;noIPR;noIPR;noIPR;noIPR;noIPR;noIPR;noIPR;IPR036770;IPR036770	GO:0005515;;;;;;;;;;;;;
Vitvi10g04055_t001	RVW64857.1hypothetical protein CK203_066365	139	2	8.5e-51	0.8649	Vitis vinifera	0.8649				IPR036770;IPR036770	;
Vitvi10g04056_t001	XP_010646982.1PREDICTED: uncharacterized protein LOC104878396 isoform X1	202	6	2.6e-100	0.8936	Vitis vinifera	0.8838	1	GO:0005515		IPR002110;IPR020683;IPR036770;noIPR;noIPR;IPR036770	GO:0005515;;;;;
Vitvi10g04057_t001	XP_019073735.1PREDICTED: uncharacterized protein LOC100855081 isoform X2	423	2	8.3e-239	0.928	Vitis vinifera	0.928				IPR026961;IPR036770;noIPR;noIPR;IPR036770	;;;;
Vitvi10g04058_t001	XP_019074202.1PREDICTED: uncharacterized protein LOC104878537	133	2	6.5e-59	0.9951	Vitis vinifera	1
Vitvi10g04059_t001	CAN68970.1hypothetical protein VITISV_043154	183	1	1.5e-06	0.6977	Vitis vinifera	0.6977				noIPR;noIPR	;
Vitvi10g04060_t001	RVW16399.1Retrovirus-related Pol polyprotein from transposon RE1	84	10	3.9e-38	0.9143	Vitis vinifera	0.9286	2	GO:0003676;GO:0016021
Vitvi10g01657_t001	XP_003635121.1PREDICTED: uncharacterized protein LOC100855081 isoform X1	601	1	0	0.8537	Vitis vinifera	0.8537				IPR026961;IPR036770;noIPR;noIPR;noIPR;IPR036770	;;;;;
Vitvi10g04061_t001	RVX07870.1hypothetical protein CK203_014677	208	2	8.6e-49	0.9731	Vitis vinifera	0.9785
Vitvi10g04062_t001	CAN83642.1hypothetical protein VITISV_005206	91	1	1.7e-58	0.978	Vitis vinifera	0.978
Vitvi10g00149_t001	GAV61238.1PAP_fibrillin domain-containing protein	66	20	2e-17	0.9756	Cephalotus follicularis	0.9767	3	GO:0009414;GO:0009535;GO:0032440	EC:1.3.1.74	IPR039633;noIPR	;
Vitvi10g04063_t001	XP_019074095.1 probable carboxylesterase SOBER1-like	214	4	7.6e-154	0.993	Vitis vinifera	1	1	GO:0016787	EC:3	IPR029058;IPR003140;noIPR;noIPR;IPR029058	;GO:0016787;;;
Vitvi10g04064_t001	XP_019074095.1 probable carboxylesterase SOBER1-like	253	3	2.8e-181	0.9974	Vitis vinifera	1	1	GO:0016787	EC:3	IPR003140;IPR029058;noIPR;noIPR;IPR029058	GO:0016787;;;;
Vitvi10g00158_t001	XP_002264069.2 probable disease resistance RPP8-like protein 4	897	2	0	0.9922	Vitis vinifera	1	2	GO:0006952;GO:0043531		noIPR;IPR003591;IPR027417;noIPR;IPR002182;IPR032675;IPR041118;IPR042197;IPR036388;noIPR;IPR044974;IPR038005;IPR027417;noIPR	;;;;GO:0043531;;;;;;GO:0006952;;;
Vitvi10g00159_t001	XP_002265147.1PREDICTED: uncharacterized protein LOC100252669	195	2	5.1e-140	0.9974	Vitis vinifera/Vitis riparia	1				noIPR;noIPR;noIPR;noIPR	;;;
Vitvi10g04065_t001	RVX08091.1putative disease resistance RPP8-like protein 4	114	2	2.3e-32	1	Vitis vinifera	1	2	GO:0006952;GO:0043531
Vitvi10g04066_t001	XP_002264069.2 probable disease resistance RPP8-like protein 4	897	2	0	0.9922	Vitis vinifera	0.9989	2	GO:0006952;GO:0043531		noIPR;IPR003591;IPR042197;IPR032675;IPR002182;noIPR;IPR027417;IPR041118;IPR036388;IPR044974;noIPR;IPR038005;IPR027417;noIPR	;;;;GO:0043531;;;;;GO:0006952;;;;
Vitvi10g04067_t001	XP_034698489.1 serine/threonine/tyrosine-protein kinase HT1-like	373	2	9.7e-259	0.9946	Vitis riparia	0.9946	3	GO:0004672;GO:0005524;GO:0006468	EC:2.7.1	IPR001245;IPR000719;IPR001245;noIPR;noIPR;noIPR;noIPR;noIPR;noIPR;IPR008271;IPR000719;noIPR;IPR011009	GO:0004672/GO:0006468;GO:0005524/GO:0004672/GO:0006468;GO:0004672/GO:0006468;;;;;;;GO:0004672/GO:0006468;GO:0005524/GO:0004672/GO:0006468;;
Vitvi10g04068_t001	RVX07961.1putative membrane protein	432	2	1.6e-263	0.8464	Vitis vinifera	0.8131	1	GO:0016021		noIPR;noIPR;noIPR;IPR040339;noIPR	;;;;
Vitvi10g04069_t001	XP_010647144.1 tropinone reductase-like 3	253	5	3.1e-172	0.9913	Vitis vinifera	0.996	1	GO:0016491	EC:1	IPR002347;IPR002347;noIPR;noIPR;noIPR;noIPR;noIPR;noIPR;IPR020904;IPR036291	GO:0016491;GO:0016491;;;;;;;GO:0016491;
Vitvi10g00164_t001	XP_002264320.1 EH domain-containing protein 1	545	4	0	0.9825	Vitis vinifera	0.9982	3	GO:0005509;GO:0005515;GO:0005525		noIPR;IPR000261;IPR002048;IPR000261;noIPR;IPR040990;noIPR;IPR045063;IPR031692;IPR027417;noIPR;noIPR;IPR002048;IPR030381;IPR000261;noIPR;IPR000261;IPR011992;IPR027417	;GO:0005515;GO:0005509;GO:0005515;;;;;;;;;GO:0005509;GO:0005525;GO:0005515;;GO:0005515;;
Vitvi10g04070_t001	XP_019073986.1 RPM1-interacting protein 4	197	1	4.9e-104	0.8086	Vitis vinifera	0.8086				IPR008700;noIPR;noIPR;noIPR;noIPR;noIPR;noIPR;IPR040387;noIPR	;;;;;;;;
Vitvi10g04071_t001	XP_003635309.1 non-specific lipid-transfer protein-like	117	3	5.4e-77	1	Vitis vinifera	1	4	GO:0005576;GO:0006869;GO:0008289;GO:0016020		IPR000528;IPR016140;IPR016140;IPR036312;noIPR;IPR000528;IPR000528;noIPR;IPR036312	GO:0006869/GO:0008289;;;;;GO:0006869/GO:0008289;GO:0006869/GO:0008289;;
Vitvi10g04072_t001	XP_010646961.1 non-specific lipid-transfer protein P3-like	117	3	1.6e-78	1	Vitis vinifera	1	2	GO:0006869;GO:0008289		IPR000528;IPR016140;IPR036312;IPR000528;noIPR;noIPR;IPR036312	GO:0006869/GO:0008289;;;GO:0006869/GO:0008289;;;
Vitvi10g04073_t001	RVW45876.1hypothetical protein CK203_101136	119	2	9.2e-43	1	Vitis vinifera	1				noIPR;noIPR;noIPR;noIPR	;;;
Vitvi10g00167_t001	XP_002264133.2 phosphoribosylglycinamide formyltransferase, chloroplastic	300	4	1.2e-220	0.995	Vitis vinifera	0.9967	3	GO:0004644;GO:0006189;GO:0009507	EC:2.1.2.2	IPR004607;IPR002376;noIPR;noIPR;IPR001555;IPR004607;IPR004607;IPR036477	GO:0004644/GO:0006189;GO:0016742/GO:0009058;;;;GO:0004644/GO:0006189;GO:0004644/GO:0006189;GO:0016742/GO:0009058
Vitvi10g04074_t001	RVW45877.1hypothetical protein CK203_101134	268	3	1.5e-151	0.8512	Vitis vinifera	0.8546				IPR006502;IPR006502;IPR006502;noIPR	;;;
Vitvi10g04075_t001	XP_034697831.1alkaline ceramidase	255	1	4e-194	1	Vitis riparia	1	6	GO:0006672;GO:0006914;GO:0009651;GO:0016021;GO:0016811;GO:0098542	EC:3.5.1	IPR008901;noIPR;IPR044219	GO:0006672/GO:0016021/GO:0016811;;GO:0098542/GO:0009651/GO:0006914
Vitvi10g04075_t002	XP_034697831.1alkaline ceramidase	255	1	4e-194	1	Vitis riparia	1	6	GO:0006672;GO:0006914;GO:0009651;GO:0016021;GO:0016811;GO:0098542	EC:3.5.1	IPR008901;noIPR;IPR044219	GO:0006672/GO:0016021/GO:0016811;;GO:0098542/GO:0009651/GO:0006914
Vitvi10g00174_t001	XP_003635028.2 phosphatidate cytidylyltransferase 1	424	3	0	0.9801	Vitis vinifera	1	3	GO:0004605;GO:0016021;GO:0016024	EC:2.7.7.41	IPR016720;noIPR;noIPR;IPR016720;noIPR;IPR000374	GO:0004605;;;GO:0004605;;GO:0016772/GO:0016020
Vitvi10g00174_t002	XP_003635028.2 phosphatidate cytidylyltransferase 1	424	3	0	0.9801	Vitis vinifera	1	3	GO:0004605;GO:0016021;GO:0016024	EC:2.7.7.41	IPR016720;noIPR;noIPR;IPR016720;noIPR;IPR000374	GO:0004605;;;GO:0004605;;GO:0016772/GO:0016020
Vitvi10g04076_t001	OVA10062.1Phospholipase C	195	1	9.4e-21	0.5661	Macleaya cordata	0.5661				noIPR;noIPR;noIPR	;;
Vitvi10g01665_t001	XP_002265268.1 uclacyanin-3	224	2	1.7e-102	0.9903	Vitis vinifera	1	3	GO:0009055;GO:0022900;GO:0046658	EC:1	IPR003245;IPR008972;noIPR;IPR039391;IPR003245;noIPR;IPR008972	GO:0009055;;;GO:0009055;GO:0009055;;
Vitvi10g01666_t001	XP_002271669.2 mavicyanin	171	3	6.1e-118	0.9961	Vitis vinifera	1	3	GO:0009055;GO:0016021;GO:0022900	EC:1	IPR008972;IPR003245;IPR039391;noIPR;IPR003245;noIPR;IPR008972	;GO:0009055;GO:0009055;;GO:0009055;;
Vitvi10g00176_t001	XP_002262798.3 transcription initiation factor IIF subunit alpha	539	2	1.1E-314	0.9963	Vitis vinifera	0.9981	6	GO:0001096;GO:0003677;GO:0005674;GO:0006367;GO:0016251;GO:0032968		IPR036388;IPR008851;noIPR;noIPR;noIPR;noIPR;noIPR;noIPR;noIPR;IPR008851;IPR011039;IPR036390	;GO:0005634/GO:0003677/GO:0032968/GO:0006367;;;;;;;;GO:0005634/GO:0003677/GO:0032968/GO:0006367;GO:0006367;
Vitvi10g00177_t001	XP_010646198.1 fumarylacetoacetase	419	4	0	0.9964	Vitis vinifera	1	5	GO:0004334;GO:0006559;GO:0006572;GO:0046872;GO:1902000	EC:3.7.1.2	IPR005959;IPR036462;IPR011234;IPR036663;IPR015377;noIPR;IPR005959;IPR036663;IPR036462	GO:0009072/GO:0004334;GO:0009072/GO:0004334;GO:0003824;GO:0003824;GO:0009072/GO:0004334;;GO:0009072/GO:0004334;GO:0003824;GO:0009072/GO:0004334
Vitvi10g00178_t001	XP_019073599.1 BAG family molecular chaperone regulator 5, mitochondrial-like	220	3	9.3e-128	0.9485	Vitis vinifera	1	3	GO:0006457;GO:0009506;GO:0051087		IPR003103;IPR003103;IPR036533;noIPR;noIPR;IPR040400;IPR003103;IPR000048;IPR036533	GO:0051087;GO:0051087;GO:0051087;;;;GO:0051087;GO:0005515;GO:0051087
Vitvi10g00179_t001	XP_010646197.1 mannan endo-1,4-beta-mannosidase 6-like	451	5	0	0.9916	Vitis vinifera	1	4	GO:0005576;GO:0016021;GO:0016985;GO:0071704	EC:3.2.1.25;EC:3.2.1.78	IPR001547;noIPR;IPR045053;noIPR;IPR017853	GO:0071704/GO:0004553;;GO:0004553;;
Vitvi10g00182_t001	RVW58233.1hypothetical protein CK203_111219	104	3	3.9e-73	0.9968	Vitis vinifera	1
Vitvi10g01667_t001	XP_002278381.1 V-type proton ATPase subunit e1	70	2	1.2e-40	0.9929	Vitis vinifera/Vitis riparia	1	4	GO:0015078;GO:0016021;GO:0033179;GO:1902600	EC:7	IPR008389;noIPR;IPR008389	GO:1902600/GO:0015078/GO:0033179;;GO:1902600/GO:0015078/GO:0033179
Vitvi10g00183_t001	XP_010646195.1 acyl-CoA--sterol O-acyltransferase 1-like	382	5	3.1e-271	0.9885	Vitis vinifera	1	3	GO:0006629;GO:0008374;GO:0016021	EC:2.3.1	IPR017088;IPR032805;IPR044851;noIPR	GO:0008374;;GO:0006629/GO:0008374;
Vitvi10g04077_t001	XP_010646198.1 fumarylacetoacetase	343	4	2.9e-261	0.9964	Vitis vinifera	1	5	GO:0004334;GO:0006559;GO:0006572;GO:0046872;GO:1902000	EC:3.7.1.2	IPR036663;IPR015377;IPR011234;IPR005959;IPR036462;IPR005959;noIPR;IPR036462;IPR036663	GO:0003824;GO:0009072/GO:0004334;GO:0003824;GO:0009072/GO:0004334;GO:0009072/GO:0004334;GO:0009072/GO:0004334;;GO:0009072/GO:0004334;GO:0003824
Vitvi10g00185_t001	XP_003635020.1 BAG family molecular chaperone regulator 5, mitochondrial	217	2	6.4e-138	0.9954	Vitis vinifera	1	3	GO:0006457;GO:0009506;GO:0051087		IPR003103;IPR003103;IPR036533;IPR040400;noIPR;IPR000048;IPR003103;IPR036533	GO:0051087;GO:0051087;GO:0051087;;;GO:0005515;GO:0051087;GO:0051087
Vitvi10g00186_t001	XP_003635019.1 mannan endo-1,4-beta-mannosidase 6	449	5	0	0.9938	Vitis vinifera	1	4	GO:0005576;GO:0016021;GO:0016985;GO:0071704	EC:3.2.1.25;EC:3.2.1.78	IPR001547;noIPR;noIPR;IPR045053;IPR017853	GO:0071704/GO:0004553;;;GO:0004553;
Vitvi10g00187_t001	RVX08004.1hypothetical protein CK203_014623	104	2	2.2e-72	1	Vitis vinifera	1
Vitvi10g04078_t001	XP_003635026.2 acyl-CoA--sterol O-acyltransferase 1-like	372	5	1.4e-262	0.9876	Vitis vinifera	1	3	GO:0006629;GO:0008374;GO:0016021	EC:2.3.1	IPR017088;IPR032805;noIPR;IPR044851	GO:0008374;;;GO:0006629/GO:0008374
Vitvi10g04079_t001	XP_034697437.1uncharacterized protein LOC117923312	95	4	4.4e-35	0.9278	Vitis riparia	0.9841	1	GO:0016021
Vitvi10g00191_t001	RVW30211.1Upstream activation factor subunit UAF30	344	6	7.6e-230	0.9718	Vitis vinifera	1	3	GO:0001228;GO:0005634;GO:0045944		IPR019835;IPR014876;IPR003121;IPR036885;noIPR;noIPR;noIPR;IPR003121;IPR003121;noIPR;noIPR;IPR036885;IPR036885	;;;;;;;;;;;;
Vitvi10g04080_t001	XP_010646191.1 putative lipid-transfer protein DIR1	104	2	2.5e-69	0.9951	Vitis vinifera/Vitis riparia	1	4	GO:0005504;GO:0005576;GO:0009627;GO:0016021		IPR016140;IPR036312;IPR016140;IPR039265;noIPR;IPR044741;IPR036312	;;;GO:0005504/GO:0009627;;;
Vitvi10g04081_t001	CAN72893.1hypothetical protein VITISV_022313	267	3	3.7e-196	0.9925	Vitis vinifera	1	1	GO:0016021		noIPR;noIPR;noIPR;IPR032710	;;;
Vitvi10g04082_t001	XP_002277989.1 ER membrane protein complex subunit 3	246	3	1.4e-169	0.9891	Vitis vinifera/Vitis riparia	1	1	GO:0072546		IPR002809;IPR008568;IPR002809;IPR008568;noIPR	GO:0016020;GO:0016020;GO:0016020;GO:0016020;
Vitvi10g00194_t001	XP_002278188.2 rho GDP-dissociation inhibitor 1	245	3	3.6e-167	0.9973	Vitis vinifera	1	5	GO:0005094;GO:0005829;GO:0007266;GO:0016020;GO:0050790		IPR000406;IPR024792;IPR000406;noIPR;noIPR;noIPR;noIPR;IPR000406;IPR014756	GO:0005737/GO:0005094;;GO:0005737/GO:0005094;;;;;GO:0005737/GO:0005094;
Vitvi10g00195_t001	CBI33109.3unnamed protein product, partial	238	2	3.3e-136	1	Vitis vinifera	1	1	GO:0016021		noIPR
Vitvi10g00196_t001	RVW80470.1Upstream activation factor subunit UAF30	347	5	2e-231	0.9692	Vitis vinifera	1	3	GO:0001228;GO:0005634;GO:0045944		IPR019835;IPR036885;IPR003121;IPR014876;noIPR;noIPR;noIPR;IPR003121;IPR003121;noIPR;noIPR;IPR036885;IPR036885	;;;;;;;;;;;;
Vitvi10g04083_t001	XP_010646191.1 putative lipid-transfer protein DIR1	104	2	2.5e-69	0.9951	Vitis vinifera/Vitis riparia	1	4	GO:0005504;GO:0005576;GO:0009627;GO:0016021		IPR016140;IPR036312;IPR016140;IPR039265;noIPR;IPR044741;IPR036312	;;;GO:0005504/GO:0009627;;;
Vitvi10g00197_t001	XP_010646190.1PREDICTED: uncharacterized protein LOC104878113	267	3	7.4e-196	0.9938	Vitis vinifera	1	1	GO:0016021		noIPR;noIPR;noIPR;IPR032710	;;;
Vitvi10g04084_t001	XP_002277989.1 ER membrane protein complex subunit 3	246	3	1.4e-169	0.9891	Vitis vinifera/Vitis riparia	1	1	GO:0072546		IPR002809;IPR008568;IPR002809;IPR008568;noIPR	GO:0016020;GO:0016020;GO:0016020;GO:0016020;
Vitvi10g04085_t001	NP_001268080.1ripening-related protein-like	141	1	2.2e-10	0.8092	Vitis vinifera	0.8092				noIPR;noIPR;noIPR;noIPR;noIPR	;;;;
Vitvi10g00198_t001	XP_002272059.1 E3 ubiquitin-protein ligase UPL5	893	3	0	0.9985	Vitis vinifera	1	3	GO:0004842;GO:0005515;GO:0016567	EC:2	IPR019956;IPR000626;IPR000569;noIPR;IPR000569;noIPR;IPR000626;noIPR;noIPR;noIPR;noIPR;IPR000626;IPR000569;IPR000569;IPR035983;IPR029071	;GO:0005515;GO:0004842;;GO:0004842;;GO:0005515;;;;;GO:0005515;GO:0004842;GO:0004842;GO:0004842;
Vitvi10g04086_t001	CAN70352.1hypothetical protein VITISV_011215	65	1	1.8e-30	0.9231	Vitis vinifera	0.9231
Vitvi10g00204_t001	XP_010646189.1 tonoplast dicarboxylate transporter	531	3	0	0.9994	Vitis vinifera	1	3	GO:0016021;GO:0022857;GO:0098656	EC:7	IPR001898;IPR001898;noIPR;noIPR;noIPR	GO:0055085/GO:0022857/GO:0016020;GO:0055085/GO:0022857/GO:0016020;;;
Vitvi10g01674_t001	XP_010646202.1 cysteine proteinase inhibitor 1-like	120	3	3.6e-81	1	Vitis vinifera	1	2	GO:0004869;GO:0010951		IPR000010;noIPR;IPR000010;noIPR;IPR027214;IPR000010;noIPR	GO:0004869;;GO:0004869;;GO:0004869;GO:0004869;
Vitvi10g01675_t001	XP_002277752.1 cysteine proteinase inhibitor 5-like	112	2	1.4e-70	0.9955	Vitis vinifera	1	2	GO:0004869;GO:0010951		IPR000010;IPR000010;noIPR;noIPR;IPR000010;noIPR	GO:0004869;GO:0004869;;;GO:0004869;
Vitvi10g01676_t001	XP_003635024.1 heavy metal-associated isoprenylated plant protein 16-like	127	1	5.7e-77	1	Vitis vinifera	1				noIPR;IPR044296;noIPR	;;
Vitvi10g01678_t001	MBL1488494.1hypothetical protein	145	1	7.2e-46	0.8421	Klebsiella pneumoniae	0.8421				noIPR;IPR009994;noIPR	;;
Vitvi10g04087_t001	MBL1488494.1hypothetical protein	144	1	4.7e-32	0.8267	Klebsiella pneumoniae	0.8267				IPR009994;noIPR	;
Vitvi10g04088_t001	MBL1488494.1hypothetical protein	146	1	3.9e-64	1	Klebsiella pneumoniae	1	1	GO:0004869		IPR000010;noIPR;noIPR	GO:0004869;;
Vitvi10g01679_t001	MBL1488494.1hypothetical protein	145	1	8.8e-40	0.7789	Klebsiella pneumoniae	0.7789	1	GO:0004869		noIPR;IPR000010;noIPR	;GO:0004869;
Vitvi10g04089_t001	---NA---	159
Vitvi10g04090_t001	CAN73915.1hypothetical protein VITISV_035234	125	1	9.1e-51	0.9886	Vitis vinifera	0.9886	3	GO:0003735;GO:0006412;GO:0015934		IPR036394;IPR005721;noIPR;IPR036394	GO:0006412/GO:0005840/GO:0003735;GO:0006412/GO:0015934/GO:0003735;;GO:0006412/GO:0005840/GO:0003735
Vitvi10g04091_t001	CBI33100.3unnamed protein product, partial	103	1	6.2e-41	1	Vitis vinifera	1
Vitvi10g04092_t001	MBL1488494.1hypothetical protein	146	1	1.9e-29	0.6842	Klebsiella pneumoniae	0.6842	1	GO:0004869		IPR000010;noIPR;noIPR	GO:0004869;;
Vitvi10g01682_t001	CAN82796.1hypothetical protein VITISV_013493	100	1	4.3e-66	0.99	Vitis vinifera	0.99	2	GO:0004869;GO:0010951		IPR000010;noIPR;noIPR	GO:0004869;;
Vitvi10g00209_t001	RVW80458.1Cysteine proteinase inhibitor 1	146	2	3.2e-101	0.9829	Vitis vinifera	1	2	GO:0004869;GO:0010951		IPR000010;IPR000010;noIPR;noIPR;IPR018073;IPR000010;noIPR	GO:0004869;GO:0004869;;;;GO:0004869;
Vitvi10g01683_t001	XP_010646200.1PREDICTED: uncharacterized protein LOC100853772	283	1	2.5e-204	0.961	Vitis vinifera	0.961				IPR007877;IPR007877;noIPR	;;
Vitvi10g01684_t001	XP_003635015.1PREDICTED: uncharacterized protein LOC100853073	126	3	6.1e-76	0.9922	Vitis vinifera	1				noIPR;noIPR;IPR044296	;;
Vitvi10g00210_t001	XP_034698713.1heavy metal-associated isoprenylated plant protein 3-like	122	3	2.1e-68	0.9392	Vitis riparia	0.9444				noIPR;noIPR;noIPR;IPR044296	;;;
Vitvi10g04093_t001	RVW80395.1hypothetical protein CK203_042279	157	1	2.6e-71	0.6968	Vitis vinifera	0.6968				noIPR;IPR044296;noIPR	;;
Vitvi10g00212_t001	RVW30210.1ATP-dependent 6-phosphofructokinase 2	449	3	0	0.9446	Vitis vinifera	0.9591	6	GO:0003872;GO:0005524;GO:0005737;GO:0006002;GO:0046872;GO:0061615	EC:2.7.1.11	IPR022953;noIPR;IPR012004;IPR000023;noIPR;noIPR;IPR012004;IPR035966	GO:0003872/GO:0006002/GO:0006096;;GO:0003872/GO:0005524/GO:0006096;GO:0003872/GO:0006096;;;GO:0003872/GO:0005524/GO:0006096;GO:0003872/GO:0006096
Vitvi10g00213_t001	XP_010647335.1 glucan endo-1,3-beta-glucosidase 5 isoform X1	492	2	0	0.999	Vitis vinifera	1	2	GO:0004553;GO:0005975	EC:3.2.1	IPR012946;noIPR;IPR000490;IPR012946;noIPR;IPR044965;noIPR;IPR000490;IPR017853	;;GO:0004553/GO:0005975;;;GO:0004553/GO:0005975;;GO:0004553/GO:0005975;
Vitvi10g00213_t002	XP_019074185.1 glucan endo-1,3-beta-glucosidase 5 isoform X2	396	1	3.1e-294	1	Vitis vinifera	1	2	GO:0004553;GO:0005975	EC:3.2.1	IPR012946;noIPR;noIPR;IPR012946;IPR000490;IPR044965;noIPR;IPR000490;IPR017853	;;;;GO:0004553/GO:0005975;GO:0004553/GO:0005975;;GO:0004553/GO:0005975;
Vitvi10g01685_t001	CBI41065.3unnamed protein product, partial	68	1	1e-45	1	Vitis vinifera	1
Vitvi10g04094_t001	RVW80388.1E3 ubiquitin-protein ligase RGLG2	87	2	2.1e-16	1	Vitis vinifera	1
Vitvi10g00214_t002	XP_010647337.1 E3 ubiquitin-protein ligase RGLG2	415	3	1.2E-312	0.9705	Vitis vinifera	1				IPR002035;noIPR;IPR010734;IPR013083;noIPR;noIPR;noIPR;noIPR;IPR001841;noIPR;noIPR;IPR036465	;;;;;;;;;;;
Vitvi10g00214_t001	XP_010647337.1 E3 ubiquitin-protein ligase RGLG2	415	3	1.2E-312	0.9705	Vitis vinifera	1				IPR002035;noIPR;IPR010734;IPR013083;noIPR;noIPR;noIPR;noIPR;IPR001841;noIPR;noIPR;IPR036465	;;;;;;;;;;;
Vitvi10g01686_t001	XP_034698747.1uncharacterized protein LOC117924262 isoform X2	189	4	1.8e-119	0.9921	Vitis riparia	0.9947				noIPR;noIPR	;
Vitvi10g00215_t001	XP_010646232.1PREDICTED: uncharacterized protein At4g26485	233	2	1.3e-163	0.9979	Vitis vinifera	1				IPR019446;noIPR;noIPR;noIPR;noIPR;IPR029063	;;;;;
Vitvi10g01687_t001	XP_002274855.1 DNA-directed RNA polymerases IV and V subunit 4 isoform X1	239	3	2.6e-166	0.993	Vitis vinifera	1	7	GO:0000166;GO:0003697;GO:0003727;GO:0003899;GO:0005634;GO:0006352;GO:0030880	EC:2.7.7.6	IPR006590;IPR005574;IPR038324;noIPR;noIPR;noIPR;noIPR;IPR010997	;GO:0006352/GO:0030880;;;;;;GO:0044237/GO:0000166
Vitvi10g00217_t001	XP_003635036.1 heat shock cognate protein 80	699	20	0	0.982	Vitis vinifera	1	10	GO:0005524;GO:0005829;GO:0005886;GO:0006457;GO:0016887;GO:0032991;GO:0034605;GO:0048471;GO:0050821;GO:0051082		noIPR;noIPR;IPR020575;IPR003594;IPR001404;IPR036890;IPR003594;IPR037196;noIPR;noIPR;IPR001404;noIPR;noIPR;noIPR;noIPR;IPR001404;noIPR;IPR019805;IPR001404;noIPR;IPR020568;IPR036890;IPR037196	;;;;GO:0051082/GO:0006457/GO:0016887/GO:0005524;;;;;;GO:0051082/GO:0006457/GO:0016887/GO:0005524;;;;;GO:0051082/GO:0006457/GO:0016887/GO:0005524;;GO:0051082/GO:0005524/GO:0006457;GO:0051082/GO:0006457/GO:0016887/GO:0005524;;;;
Vitvi10g04095_t001	NP_001267977.1Calcineurin B-like protein 3-like	226	17	1.2e-142	0.9121	Vitis amurensis/Vitis vinifera/Vitis riparia	1	1	GO:0005509		noIPR;IPR002048;IPR002048;IPR002048;noIPR;noIPR;noIPR;IPR002048;IPR002048;IPR002048;IPR011992	;GO:0005509;GO:0005509;GO:0005509;;;;GO:0005509;GO:0005509;GO:0005509;
Vitvi10g04095_t002	XP_034698531.1calcineurin B-like protein 3 isoform X1	243	1	3.4e-155	1	Vitis riparia	1	1	GO:0005509		noIPR;IPR002048;IPR002048;noIPR;IPR002048;noIPR;noIPR;noIPR;noIPR;IPR002048;IPR002048;IPR002048;IPR011992	;GO:0005509;GO:0005509;;GO:0005509;;;;;GO:0005509;GO:0005509;GO:0005509;
Vitvi10g04096_t001	CBI25734.3unnamed protein product, partial	93	1	1.1e-24	1	Vitis vinifera	1
Vitvi10g00219_t001	XP_002265377.2 zinc finger protein CONSTANS-LIKE 9	414	3	5.5e-272	0.996	Vitis vinifera	1	3	GO:0005515;GO:0005634;GO:0008270		IPR000315;IPR010402;noIPR;noIPR;IPR000315;IPR000315;IPR010402;noIPR;noIPR	GO:0008270;GO:0005515;;;GO:0008270;GO:0008270;GO:0005515;;
Vitvi10g00220_t001	XP_010646247.1 BTB/POZ domain-containing protein At5g47800 isoform X2	593	4	0	0.9958	Vitis vinifera	1	2	GO:0005515;GO:0016567		IPR011333;IPR027356;noIPR;noIPR;IPR043454;noIPR;IPR027356;IPR000210;noIPR;IPR011333	;;;;;;;GO:0005515;;
Vitvi10g04097_t001	---NA---	108									noIPR;noIPR;noIPR;noIPR	;;;
Vitvi10g00221_t001	XP_034698737.1protein phosphatase 1 regulatory inhibitor subunit PPP1R8 homolog	434	2	2.3e-290	0.9862	Vitis vinifera	0.9977	2	GO:0003729;GO:0005515		IPR000253;noIPR;IPR000253;noIPR;noIPR;noIPR;noIPR;noIPR;noIPR;IPR000253;IPR000253;IPR008984	GO:0005515;;GO:0005515;;;;;;;GO:0005515;GO:0005515;GO:0005515
Vitvi10g04098_t001	CBI29583.3unnamed protein product, partial	80	1	2.7e-43	1	Vitis vinifera	1
Vitvi10g00222_t001	XP_002264782.2 C2 and GRAM domain-containing protein At1g03370 isoform X1	997	3	0	0.9589	Vitis vinifera	0.967	1	GO:0016021		IPR000008;IPR004182;IPR000008;IPR004182;IPR011993;IPR000008;IPR035892;IPR031968;IPR035892;noIPR;noIPR;noIPR;IPR044511;IPR031968;IPR031968;IPR000008;IPR000008;noIPR;noIPR;noIPR;IPR035892;IPR035892	;;;;;;;;;;;;;;;;;;;;;
Vitvi10g00223_t001	XP_003635038.1 phosphoglycolate phosphatase 2 isoform X2	306	6	6.5e-221	0.9973	Vitis vinifera	1	2	GO:0016311;GO:0016791	EC:3.1.3	IPR006357;IPR006357;IPR006357;IPR023214;IPR006349;noIPR;IPR023214;noIPR;noIPR;noIPR;noIPR;noIPR;noIPR;IPR036412	;;;;GO:0016791;;;;;;;;;
Vitvi10g00224_t001	RVW80451.1Serine acetyltransferase 1, chloroplastic	306	3	1.8e-209	0.9978	Vitis vinifera	1	3	GO:0005829;GO:0006535;GO:0009001	EC:2.3.1.30	noIPR;IPR010493;IPR005881;IPR010493;IPR042122;noIPR;IPR001451;noIPR;noIPR;IPR018357;noIPR;IPR011004	;GO:0006535/GO:0005737/GO:0009001;GO:0006535/GO:0005737/GO:0009001;GO:0006535/GO:0005737/GO:0009001;;;;;;GO:0016740;;
Vitvi10g00225_t001	XP_010646250.1 transcriptional adapter ADA2b isoform X1	560	5	0	0.9772	Vitis vinifera	0.9982	13	GO:0003682;GO:0003713;GO:0005515;GO:0005634;GO:0006338;GO:0006357;GO:0008270;GO:0009631;GO:0009733;GO:0009735;GO:0035066;GO:0042127;GO:0045893		IPR001005;IPR000433;noIPR;IPR036388;IPR000433;IPR016827;IPR017930;IPR043145;noIPR;noIPR;IPR034318;noIPR;IPR000433;IPR000433;IPR007526;IPR001005;IPR017884;IPR001005;IPR041983;noIPR;IPR009057;IPR009057	;GO:0008270;;;GO:0008270;GO:0006357/GO:0035065/GO:0003713;;;;;GO:0006357/GO:0035065/GO:0003713;;GO:0008270;GO:0008270;GO:0005515;;;;;;;
Vitvi10g00225_t002	XP_010646250.1 transcriptional adapter ADA2b isoform X1	560	5	0	0.9772	Vitis vinifera	0.9982	13	GO:0003682;GO:0003713;GO:0005515;GO:0005634;GO:0006338;GO:0006357;GO:0008270;GO:0009631;GO:0009733;GO:0009735;GO:0035066;GO:0042127;GO:0045893		IPR001005;IPR000433;noIPR;IPR036388;IPR000433;IPR016827;IPR017930;IPR043145;noIPR;noIPR;IPR034318;noIPR;IPR000433;IPR000433;IPR007526;IPR001005;IPR017884;IPR001005;IPR041983;noIPR;IPR009057;IPR009057	;GO:0008270;;;GO:0008270;GO:0006357/GO:0035065/GO:0003713;;;;;GO:0006357/GO:0035065/GO:0003713;;GO:0008270;GO:0008270;GO:0005515;;;;;;;
Vitvi10g00225_t003	XP_010646250.1 transcriptional adapter ADA2b isoform X1	560	5	0	0.9772	Vitis vinifera	0.9982	13	GO:0003682;GO:0003713;GO:0005515;GO:0005634;GO:0006338;GO:0006357;GO:0008270;GO:0009631;GO:0009733;GO:0009735;GO:0035066;GO:0042127;GO:0045893		IPR001005;IPR000433;noIPR;IPR036388;IPR000433;IPR016827;IPR017930;IPR043145;noIPR;noIPR;IPR034318;noIPR;IPR000433;IPR000433;IPR007526;IPR001005;IPR017884;IPR001005;IPR041983;noIPR;IPR009057;IPR009057	;GO:0008270;;;GO:0008270;GO:0006357/GO:0035065/GO:0003713;;;;;GO:0006357/GO:0035065/GO:0003713;;GO:0008270;GO:0008270;GO:0005515;;;;;;;
Vitvi10g00226_t002	XP_019073628.1PREDICTED: uncharacterized protein LOC104878146	629	5	0	0.9699	Vitis vinifera	0.9617	2	GO:0003682;GO:0006325		IPR001025;IPR014002;IPR043151;IPR008395;noIPR;noIPR;noIPR;noIPR;noIPR;IPR001025	GO:0003682;;;;;;;;;GO:0003682
Vitvi10g00226_t001	XP_034698346.1uncharacterized protein LOC117923945 isoform X1	648	1	0	0.9861	Vitis riparia	0.9861	1	GO:0003682		IPR014002;IPR001025;IPR008395;IPR043151;noIPR;noIPR;noIPR;noIPR;noIPR;IPR001025	;GO:0003682;;;;;;;;GO:0003682
Vitvi10g00227_t001	CBI25744.3unnamed protein product, partial	279	4	1.1e-196	0.9973	Vitis vinifera	1	2	GO:0009536;GO:0016021		IPR008470;noIPR;noIPR;noIPR	;;;
Vitvi10g00228_t001	XP_010646260.1 TPD1 protein homolog 1	177	2	5.6e-126	0.9972	Vitis vinifera	1				IPR040361;noIPR	;
Vitvi10g00229_t001	XP_034698195.1uncharacterized protein LOC117923831	109	1	5.3e-80	1	Vitis riparia/Vitis vinifera	1				noIPR;noIPR	;
Vitvi10g01689_t001	XP_010646261.1PREDICTED: uncharacterized protein LOC104878147	235	2	6.7e-126	0.9298	Vitis vinifera	1	1	GO:0016021		noIPR;noIPR;noIPR;noIPR	;;;
Vitvi10g04099_t001	---NA---	84
Vitvi10g00230_t001	XP_010646262.1 FAR1-RELATED SEQUENCE 10	690	2	0	1	Vitis vinifera	1	3	GO:0005634;GO:0006355;GO:0008270		IPR006564;IPR018289;IPR007527;IPR004330;IPR031052;noIPR;IPR007527	GO:0008270;;GO:0008270;;GO:0006355;;GO:0008270
Vitvi10g04100_t001	XP_003635043.2 two-pore potassium channel 1	363	4	6.8e-254	0.989	Vitis vinifera	1	6	GO:0005509;GO:0005887;GO:0009705;GO:0022841;GO:0030322;GO:0071805	EC:7	IPR003280;IPR013099;noIPR;noIPR;IPR003280;noIPR;IPR002048;noIPR;noIPR;IPR011992	GO:0071805/GO:0005267/GO:0016020;;;;GO:0071805/GO:0005267/GO:0016020;;GO:0005509;;;
Vitvi10g04100_t002	XP_003635043.2 two-pore potassium channel 1	347	5	1.9e-242	0.9867	Vitis vinifera	1	6	GO:0005509;GO:0005887;GO:0009705;GO:0022841;GO:0030322;GO:0071805	EC:7	IPR003280;IPR013099;noIPR;noIPR;IPR003280;noIPR;IPR002048;noIPR;noIPR;IPR011992	GO:0071805/GO:0005267/GO:0016020;;;;GO:0071805/GO:0005267/GO:0016020;;GO:0005509;;;
Vitvi10g04100_t003	XP_003635043.2 two-pore potassium channel 1	347	5	1.9e-242	0.9867	Vitis vinifera	1	6	GO:0005509;GO:0005887;GO:0009705;GO:0022841;GO:0030322;GO:0071805	EC:7	IPR003280;IPR013099;noIPR;noIPR;IPR003280;noIPR;IPR002048;noIPR;noIPR;IPR011992	GO:0071805/GO:0005267/GO:0016020;;;;GO:0071805/GO:0005267/GO:0016020;;GO:0005509;;;
Vitvi10g04100_t004	XP_003635043.2 two-pore potassium channel 1	347	5	1.9e-242	0.9867	Vitis vinifera	1	6	GO:0005509;GO:0005887;GO:0009705;GO:0022841;GO:0030322;GO:0071805	EC:7	IPR003280;IPR013099;noIPR;noIPR;IPR003280;noIPR;IPR002048;noIPR;noIPR;IPR011992	GO:0071805/GO:0005267/GO:0016020;;;;GO:0071805/GO:0005267/GO:0016020;;GO:0005509;;;
Vitvi10g04101_t001	CBI25748.3unnamed protein product, partial	90	1	1.4e-50	1	Vitis vinifera	1	1	GO:0016021		noIPR;noIPR	;
Vitvi10g04102_t001	CAN64550.1hypothetical protein VITISV_026049	138	1	8.3e-91	0.9928	Vitis vinifera	0.9928	3	GO:0003824;GO:0019773;GO:0051603		IPR029055;IPR001353;IPR034644;noIPR;IPR029055	;GO:0005839/GO:0051603;GO:0019773;;
Vitvi10g04103_t001	RVW77870.1hypothetical protein CK203_054309	50	1	2.3e-08	0.9189	Vitis vinifera	0.9189	2	GO:0006508;GO:0008234	EC:3.4	noIPR
Vitvi10g01696_t001	XP_010646267.1 two pore potassium channel a-like	363	4	1.4e-253	0.9938	Vitis vinifera	1	6	GO:0005509;GO:0005887;GO:0009705;GO:0022841;GO:0030322;GO:0071805	EC:7	IPR003280;noIPR;noIPR;IPR013099;IPR003280;noIPR;IPR002048;noIPR;IPR011992;noIPR	GO:0071805/GO:0005267/GO:0016020;;;;GO:0071805/GO:0005267/GO:0016020;;GO:0005509;;;
Vitvi10g01696_t002	XP_010646267.1 two pore potassium channel a-like	363	4	1.4e-253	0.9938	Vitis vinifera	1	6	GO:0005509;GO:0005887;GO:0009705;GO:0022841;GO:0030322;GO:0071805	EC:7	IPR003280;noIPR;noIPR;IPR013099;IPR003280;noIPR;IPR002048;noIPR;IPR011992;noIPR	GO:0071805/GO:0005267/GO:0016020;;;;GO:0071805/GO:0005267/GO:0016020;;GO:0005509;;;
Vitvi10g04104_t001	CBI25748.3unnamed protein product, partial	86	1	1.6e-50	1	Vitis vinifera	1	1	GO:0016021		noIPR;noIPR	;
Vitvi10g00231_t001	XP_002267938.1 microtubule-associated protein 70-5	584	1	0	1	Vitis vinifera/Vitis riparia	1	4	GO:0007010;GO:0008017;GO:0009832;GO:0010051		noIPR;noIPR;noIPR;noIPR;noIPR;noIPR;noIPR;noIPR;IPR009768;noIPR;noIPR;noIPR;IPR009768	;;;;;;;;GO:0007010/GO:0008017;;;;GO:0007010/GO:0008017
Vitvi10g04105_t001	CAN63130.1hypothetical protein VITISV_001457	144	1	5.7e-101	0.9931	Vitis vinifera	0.9931				IPR025322;noIPR;noIPR	;;
Vitvi10g00232_t001	XP_002269600.2 pentatricopeptide repeat-containing protein At4g16390, chloroplastic	701	5	0	0.9806	Vitis vinifera	1	2	GO:0005515;GO:0009507		IPR002625;IPR011990;IPR002885;IPR002885;IPR011990;IPR011990;IPR033443;IPR002885;noIPR;noIPR;noIPR;noIPR;IPR002885;IPR002625;IPR002885;IPR002885;IPR002885;IPR002885;IPR002885;IPR002885;IPR002885;IPR002885;noIPR;IPR011990	;GO:0005515;;;GO:0005515;GO:0005515;;;;;;;;;;;;;;;;;;GO:0005515
Vitvi10g01697_t001	CBI25754.3unnamed protein product, partial	285	1	2.4e-142	0.9929	Vitis vinifera	0.9929				IPR013763;IPR006671;noIPR;noIPR;IPR039361;noIPR;IPR006671;IPR013763;IPR036915	;;;;;;;;
Vitvi10g04106_t001	RVW58875.1Cyclin-D3-1	59	1	3.3e-33	1	Vitis vinifera	1	2	GO:0007049;GO:0051301
Vitvi10g01698_t001	CBI25754.3unnamed protein product, partial	89	1	3.3e-54	1	Vitis vinifera	1				noIPR
Vitvi10g00233_t001	CBI25755.3unnamed protein product, partial	185	1	2.1e-117	0.8649	Vitis vinifera	0.8649				noIPR;noIPR;noIPR;noIPR	;;;
Vitvi10g04107_t001	XP_002269600.2 pentatricopeptide repeat-containing protein At4g16390, chloroplastic	223	6	8.6e-121	0.99	Vitis vinifera	0.9892	2	GO:0005515;GO:0009507		IPR002885;IPR011990;IPR002885;IPR002885;noIPR;noIPR;IPR002885;IPR002885;IPR002885	;GO:0005515;;;;;;;
Vitvi10g04108_t001	XP_002269600.2 pentatricopeptide repeat-containing protein At4g16390, chloroplastic	276	5	5.9e-155	0.9991	Vitis vinifera	1	2	GO:0005515;GO:0009507		IPR002885;IPR002885;IPR011990;IPR002885;noIPR;noIPR;noIPR;noIPR;IPR002885;IPR002885;IPR002885;noIPR	;;GO:0005515;;;;;;;;;
Vitvi10g04109_t001	CBI25754.3unnamed protein product, partial	319	3	8.2e-128	0.872	Vitis vinifera	0.8794	2	GO:0007049;GO:0051301		IPR013763;IPR006671;noIPR;noIPR;noIPR;IPR039361;IPR006671;IPR013763;IPR036915	;;;;;;;;
Vitvi10g04110_t001	RVW58875.1Cyclin-D3-1	59	1	3.3e-33	1	Vitis vinifera	1	2	GO:0007049;GO:0051301
Vitvi10g01699_t001	CBI25757.3unnamed protein product, partial	139	1	2.7e-92	1	Vitis vinifera	1	3	GO:0006952;GO:0009607;GO:0016021		IPR004326;noIPR	GO:0016021/GO:0006952;
Vitvi10g01700_t001	XP_010646271.1 protein PYRICULARIA ORYZAE RESISTANCE 21 isoform X1	129	1	5.6e-78	1	Vitis vinifera	1	2	GO:0046872;GO:1900150		IPR044169;noIPR;IPR036163	GO:1900150;;GO:0046872
Vitvi10g00235_t001	XP_003635040.1 protein PYRICULARIA ORYZAE RESISTANCE 21 isoform X1	215	2	3.5e-125	1	Vitis vinifera	1	1	GO:1900150		noIPR;noIPR;IPR044169;noIPR	;;GO:1900150;
Vitvi10g00235_t002	XP_003635040.1 protein PYRICULARIA ORYZAE RESISTANCE 21 isoform X1	171	2	2.1e-89	1	Vitis vinifera	1	1	GO:1900150		noIPR;noIPR;noIPR;IPR044169	;;;GO:1900150
Vitvi10g04111_t001	XP_034697338.1uncharacterized protein LOC117923222	205	1	7.4e-113	0.8363	Vitis riparia	0.8363				noIPR;noIPR	;
Vitvi10g04112_t001	XP_034697336.1carboxyl-terminal-processing peptidase 2, chloroplastic-like	127	4	4.1e-86	0.9816	Vitis riparia	0.9918				noIPR;noIPR;noIPR;IPR029045	;;;
Vitvi10g04113_t001	XP_010646622.1 histone H2A-like	120	2	2.2e-44	0.9167	Vitis vinifera	0.9405	5	GO:0000786;GO:0003677;GO:0005634;GO:0006342;GO:0046982		IPR002119;IPR002119;IPR009072;noIPR;noIPR;noIPR;IPR009072	GO:0000786/GO:0003677;GO:0000786/GO:0003677;GO:0046982;;;;GO:0046982
Vitvi10g04114_t001	XP_034698080.1protein PYRICULARIA ORYZAE RESISTANCE 21-like isoform X2	72	4	4.2e-11	0.7639	Vitis riparia	0.7632
Vitvi10g04115_t001	XP_010647603.1 protein PYRICULARIA ORYZAE RESISTANCE 21	175	3	6.3e-122	0.9771	Vitis vinifera	0.9943	2	GO:0046872;GO:1900150		noIPR;noIPR;IPR036163	;;GO:0046872
Vitvi10g02306_t001	XP_010647377.1PREDICTED: uncharacterized protein LOC104878528	141	2	2.8e-95	0.961	Vitis vinifera	0.9716	2	GO:0046872;GO:1900150		noIPR;noIPR;noIPR;noIPR;IPR036163	;;;;GO:0046872
Vitvi10g04116_t001	RVX16894.1O-fucosyltransferase 36	65	4	6.8e-25	0.9828	Vitis vinifera	0.9828	4	GO:0006004;GO:0016021;GO:0036066;GO:0046922	EC:2.4.1.221	noIPR
Vitvi10g04117_t001	XP_034698339.1WEB family protein At1g12150-like	606	1	7.5e-307	0.9849	Vitis riparia	0.9849				noIPR;noIPR;noIPR;noIPR;noIPR;noIPR;noIPR;noIPR;IPR008545;noIPR;noIPR;noIPR;noIPR	;;;;;;;;;;;;
Vitvi10g00258_t001	XP_002273868.2 phosphatidylinositol/phosphatidylcholine transfer protein SFH9	338	1	4.2e-249	1	Vitis vinifera/Vitis riparia	1				IPR001251;IPR011074;IPR001251;IPR011074;IPR036865;noIPR;noIPR;IPR001251;IPR001251;IPR036865;IPR036273	;;;;;;;;;;
Vitvi10g00258_t002	XP_002273868.2 phosphatidylinositol/phosphatidylcholine transfer protein SFH9	339	1	3e-247	0.9971	Vitis vinifera/Vitis riparia	0.9971				IPR001251;IPR011074;IPR036865;IPR001251;IPR011074;noIPR;noIPR;IPR001251;IPR001251;IPR036273;IPR036865	;;;;;;;;;;
Vitvi10g00256_t002	XP_019073137.1 U-box domain-containing protein 36 isoform X2	233	3	5e-133	0.9983	Vitis vinifera	1				IPR006016;IPR014729;noIPR;noIPR;noIPR	;;;;
Vitvi10g00256_t001	XP_002269050.1 U-box domain-containing protein 36 isoform X1	275	2	1e-190	0.9946	Vitis vinifera	0.9964				IPR006016;IPR014729;noIPR;noIPR;noIPR;noIPR;noIPR;noIPR	;;;;;;;
Vitvi10g00255_t001	XP_034697477.1serine/threonine-protein kinase D6PKL2-like	620	2	0	0.9944	Vitis riparia	0.9903	7	GO:0004674;GO:0005524;GO:0005730;GO:0005737;GO:0005886;GO:0006468;GO:0009638	EC:2.7.1	IPR000719;IPR000719;noIPR;noIPR;noIPR;noIPR;noIPR;noIPR;noIPR;noIPR;noIPR;noIPR;noIPR;noIPR;noIPR;IPR008271;IPR000719;noIPR;IPR011009	GO:0005524/GO:0004672/GO:0006468;GO:0005524/GO:0004672/GO:0006468;;;;;;;;;;;;;;GO:0004672/GO:0006468;GO:0005524/GO:0004672/GO:0006468;;
Vitvi10g00259_t001	XP_034697327.1oligopeptide transporter 1-like	644	2	0	0.9569	Vitis riparia	0.9595	5	GO:0015031;GO:0015833;GO:0016021;GO:0035673;GO:0055085	EC:7	IPR004813;IPR004813;IPR004648;noIPR;noIPR;noIPR;noIPR	GO:0035673;GO:0035673;GO:0055085;;;;
Vitvi10g04118_t001	RVW76549.1Retrovirus-related Pol polyprotein from transposon RE2	268	7	3.5e-182	0.8935	Vitis vinifera	0.9963	2	GO:0016702;GO:0046872	EC:1.13.11	IPR029472;noIPR;noIPR	;;
Vitvi10g04119_t001	RVW87113.1Oligopeptide transporter 1	96	3	1.2e-72	0.9931	Vitis vinifera	1	3	GO:0016021;GO:0035673;GO:0055085	EC:7	IPR004813;noIPR;noIPR	GO:0035673;;
Vitvi10g00264_t001	XP_002269165.1PREDICTED: uncharacterized protein LOC100256556	404	4	8.1e-269	0.992	Vitis vinifera	0.9975				noIPR;noIPR;noIPR;noIPR;noIPR;noIPR;noIPR	;;;;;;
Vitvi10g04120_t001	XP_003635381.1 stress-associated endoplasmic reticulum protein 2 isoform X1	68	11	2e-39	0.9933	Klebsiella pneumoniae	1	5	GO:0005783;GO:0006486;GO:0015031;GO:0016021;GO:0030968		IPR010580;noIPR;IPR010580	GO:0005783;;GO:0005783
Vitvi10g04120_t002	XP_003635381.1 stress-associated endoplasmic reticulum protein 2 isoform X1	76	11	1.1e-27	0.9887	Carya illinoinensis	1	5	GO:0005783;GO:0006486;GO:0015031;GO:0016021;GO:0030968		IPR010580;noIPR;IPR010580	GO:0005783;;GO:0005783
Vitvi10g00263_t001	XP_003635380.1 protein NAR1	522	2	0	0.999	Vitis vinifera	1	4	GO:0005634;GO:0005829;GO:0051539;GO:0070482		IPR003149;IPR004108;IPR003149;noIPR;noIPR;noIPR;noIPR;IPR009016	;;;;;;;
Vitvi10g04121_t001	XP_010647129.2 CASP-like protein 2B1	202	2	1.1e-135	0.9975	Vitis vinifera	1	2	GO:0005886;GO:0016021		IPR006459;IPR006702;noIPR;noIPR	;;;
Vitvi10g04122_t001	XP_034698571.1glucan endo-1,3-beta-glucosidase 12-like	120	2	1.1e-84	0.8998	Vitis riparia	0.9833				IPR012946;noIPR;IPR012946;noIPR;IPR044788	;;;;
Vitvi10g00261_t001	RVW87117.1Glucan endo-1,3-beta-glucosidase 12	109	3	9.2e-55	0.981	Vitis vinifera	0.9759				IPR012946;IPR012946;noIPR;noIPR;IPR044788	;;;;
Vitvi10g01702_t001	CBI18627.3unnamed protein product, partial	170	3	2e-126	0.9942	Vitis vinifera	1	1	GO:0046872		noIPR;noIPR;noIPR;noIPR;IPR036163	;;;;GO:0046872
Vitvi10g01703_t001	RVW80424.1putative histone H2A.1	144	1	3e-85	0.7273	Vitis vinifera	0.7273	3	GO:0000786;GO:0003677;GO:0046982		IPR002119;IPR002119;IPR009072;IPR007125;IPR032454;noIPR;noIPR;noIPR;noIPR;IPR032458;IPR002119;IPR009072	GO:0000786/GO:0003677;GO:0000786/GO:0003677;GO:0046982;GO:0003677;;;;;;;GO:0000786/GO:0003677;GO:0046982
Vitvi10g04123_t001	XP_034697335.1probable histone H2A.1	70	1	9.9e-18	0.9778	Vitis riparia	0.9778
Vitvi10g01704_t001	XP_010646621.1 mulatexin isoform X1	184	2	3.1e-106	1	Vitis vinifera	1	1	GO:0046872		noIPR;noIPR;noIPR;noIPR;IPR036163	;;;;GO:0046872
Vitvi10g00239_t001	XP_010646622.1 histone H2A-like	146	1	1.3e-98	1	Vitis vinifera	1	5	GO:0000786;GO:0003677;GO:0005634;GO:0006342;GO:0046982		IPR002119;IPR002119;IPR032454;IPR007125;IPR009072;noIPR;noIPR;noIPR;noIPR;IPR002119;IPR009072	GO:0000786/GO:0003677;GO:0000786/GO:0003677;;GO:0003677;GO:0046982;;;;;GO:0000786/GO:0003677;GO:0046982
Vitvi10g01706_t001	XP_010646633.1PREDICTED: uncharacterized protein LOC104878256	137	1	3.7e-98	1	Vitis vinifera	1	1	GO:1900150		IPR044169;noIPR	GO:1900150;
Vitvi10g00241_t001	XP_002269930.2 protein PYRICULARIA ORYZAE RESISTANCE 21 isoform X1	233	2	1.5e-135	0.9893	Vitis vinifera	1	2	GO:0046872;GO:1900150		noIPR;noIPR;noIPR;noIPR;IPR044169;IPR036163	;;;;GO:1900150;GO:0046872
Vitvi10g00241_t002	XP_002269930.2 protein PYRICULARIA ORYZAE RESISTANCE 21 isoform X1	189	3	3.1e-100	0.9912	Vitis vinifera	1	2	GO:0046872;GO:1900150		noIPR;noIPR;IPR044169;noIPR	;;GO:1900150;
Vitvi10g04124_t001	XP_034698570.1heavy metal-associated isoprenylated plant protein 7-like	267	3	4e-122	0.9807	Vitis riparia	0.9663	1	GO:0046872		noIPR;noIPR;noIPR;noIPR;IPR006121;noIPR;noIPR;noIPR;noIPR;noIPR;IPR044577;IPR006121;IPR006121;IPR006121;IPR006121;IPR036163;IPR036163	;;;;GO:0046872;;;;;;GO:0046872;GO:0046872;GO:0046872;GO:0046872;GO:0046872;GO:0046872;GO:0046872
Vitvi10g00245_t001	XP_003635154.1 protein PYRICULARIA ORYZAE RESISTANCE 21	233	2	9.2e-139	0.9893	Vitis vinifera	1	2	GO:0046872;GO:1900150		noIPR;noIPR;noIPR;IPR044169;IPR036163	;;;GO:1900150;GO:0046872
Vitvi10g00245_t002	XP_003635154.1 protein PYRICULARIA ORYZAE RESISTANCE 21	189	3	2e-103	0.9824	Vitis vinifera	1	2	GO:0046872;GO:1900150		noIPR;noIPR;noIPR;IPR044169	;;;GO:1900150
Vitvi10g00245_t003	XP_003635154.1 protein PYRICULARIA ORYZAE RESISTANCE 21	227	2	1.1e-133	0.989	Vitis vinifera	1	2	GO:0046872;GO:1900150		noIPR;noIPR;IPR044169;noIPR;IPR036163	;;GO:1900150;;GO:0046872
Vitvi10g00246_t001	XP_002273672.2 heavy metal-associated isoprenylated plant protein 7 isoform X2	267	3	5.3e-120	0.985	Vitis vinifera	1	1	GO:0046872		noIPR;noIPR;noIPR;noIPR;IPR006121;noIPR;noIPR;noIPR;noIPR;noIPR;IPR044577;IPR006121;IPR006121;IPR006121;IPR006121;IPR036163;IPR036163	;;;;GO:0046872;;;;;;GO:0046872;GO:0046872;GO:0046872;GO:0046872;GO:0046872;GO:0046872;GO:0046872
Vitvi10g04125_t001	---NA---	125
Vitvi10g00247_t001	XP_002273768.2 oligopeptide transporter 3	748	3	0	0.9991	Vitis vinifera	1	4	GO:0005887;GO:0015031;GO:0035672;GO:0035673	EC:7	IPR004813;IPR004813;IPR004648;noIPR;noIPR;noIPR;noIPR	GO:0035673;GO:0035673;GO:0055085;;;;
Vitvi10g00248_t001	XP_002270146.2 SNF1-related protein kinase regulatory subunit beta-2	301	2	3e-212	0.9983	Vitis vinifera	1	1	GO:0005515		IPR006828;noIPR;IPR013783;IPR032640;IPR006828;noIPR;noIPR;IPR043554;noIPR;noIPR;IPR037256;IPR014756	GO:0005515;;;;GO:0005515;;;;;;;
Vitvi10g00249_t001	XP_034698922.1acyl carrier protein 3, mitochondrial isoform X1	184	2	4.9e-128	0.9946	Vitis vinifera	1	1	GO:0006633		noIPR;IPR009081;IPR003231;IPR036736;noIPR;IPR003231;IPR003231;IPR009081;IPR036736	;;GO:0006633;;;GO:0006633;GO:0006633;;
Vitvi10g00249_t002	XP_034698922.1acyl carrier protein 3, mitochondrial isoform X1	135	8	6.1e-91	0.9926	Vitis vinifera	1	4	GO:0000035;GO:0000036;GO:0005739;GO:0006633		IPR009081;IPR003231;IPR036736;IPR003231;noIPR;IPR003231;IPR009081;IPR036736	;GO:0006633;;GO:0006633;;GO:0006633;;
Vitvi10g01710_t001	XP_002275440.1PREDICTED: uncharacterized protein LOC100263809	196	3	3.2e-139	0.9949	Vitis vinifera	1				noIPR;noIPR;noIPR;noIPR	;;;
Vitvi10g00251_t001	XP_003635539.1 nuclear transcription factor Y subunit B-3	207	3	2.9e-134	0.9984	Vitis vinifera	1	5	GO:0000978;GO:0001228;GO:0016602;GO:0045944;GO:0046982		noIPR;IPR003958;IPR009072;noIPR;noIPR;noIPR;noIPR;IPR027113;IPR003956;IPR009072	;;GO:0046982;;;;;GO:0001228/GO:0016602/GO:0006355;GO:0043565/GO:0005634/GO:0006355;GO:0046982
Vitvi10g00252_t001	RVW33646.1Nudix hydrolase 2	346	5	2.1e-253	0.9988	Vitis vinifera	1	2	GO:0016787;GO:0046872	EC:3	IPR003293;noIPR;IPR040618;IPR000086;noIPR;noIPR;IPR003293;IPR020084;IPR000086;noIPR;IPR015797	;;;;;;;GO:0016787;;;
Vitvi10g00252_t002	RVW33646.1Nudix hydrolase 2	289	5	9.1e-208	0.9986	Vitis vinifera	1	2	GO:0016787;GO:0046872	EC:3	IPR020476;IPR003293;noIPR;noIPR;IPR000086;IPR040618;IPR003293;noIPR;IPR020084;IPR000086;noIPR;IPR015797	;;;;;;;;GO:0016787;;;
Vitvi10g00252_t003	RVW33646.1Nudix hydrolase 2	214	5	2.1e-154	0.9981	Vitis vinifera	1	2	GO:0016787;GO:0046872	EC:3	noIPR;IPR003293;IPR020476;noIPR;noIPR;IPR040618;IPR000086;IPR003293;noIPR;IPR020084;IPR000086;noIPR;IPR015797	;;;;;;;;;GO:0016787;;;
Vitvi10g00252_t004	RVW33646.1Nudix hydrolase 2	214	5	2.1e-154	0.9981	Vitis vinifera	1	2	GO:0016787;GO:0046872	EC:3	noIPR;IPR003293;IPR020476;noIPR;noIPR;IPR040618;IPR000086;IPR003293;noIPR;IPR020084;IPR000086;noIPR;IPR015797	;;;;;;;;;GO:0016787;;;
Vitvi10g00252_t005	RVW33646.1Nudix hydrolase 2	214	5	2.1e-154	0.9981	Vitis vinifera	1	2	GO:0016787;GO:0046872	EC:3	noIPR;IPR003293;IPR020476;noIPR;noIPR;IPR040618;IPR000086;IPR003293;noIPR;IPR020084;IPR000086;noIPR;IPR015797	;;;;;;;;;GO:0016787;;;
Vitvi10g02271_t001	XP_010647428.1 trihelix transcription factor GTL1-like	416	2	1.3e-280	0.9964	Vitis vinifera	1				noIPR;IPR001005;noIPR;IPR044822;noIPR;noIPR;noIPR;noIPR;noIPR;IPR001005;noIPR	;;;;;;;;;;
Vitvi10g02272_t001	RVW87155.1hypothetical protein CK203_026924	60	4	4.5e-32	1	Vitis vinifera	1	1	GO:0016021
Vitvi10g02273_t001	XP_003635503.1 nuclear transcription factor Y subunit B-6	211	2	7.1e-148	0.9905	Vitis vinifera	1	5	GO:0000978;GO:0001228;GO:0016602;GO:0045944;GO:0046982		noIPR;IPR003958;IPR009072;noIPR;noIPR;IPR027113;noIPR;IPR003956;IPR009072	;;GO:0046982;;;GO:0001228/GO:0016602/GO:0006355;;GO:0043565/GO:0005634/GO:0006355;GO:0046982
Vitvi10g04126_t001	XP_010647426.1 tRNA (guanine(9)-N1)-methyltransferase	290	3	1.3e-168	0.9397	Vitis vinifera	0.9423	2	GO:0030488;GO:0052905	EC:2.1.1.221	noIPR;noIPR;IPR016653;IPR016009;IPR038459;noIPR;noIPR;IPR007356;noIPR;IPR028564;noIPR	;;GO:0008168;;;;;;;;
Vitvi10g04127_t001	XP_034698557.1sister chromatid cohesion protein PDS5 homolog A	1687	2	0	0.9787	Vitis riparia	0.9867	3	GO:0005634;GO:0007064;GO:0051301		noIPR;noIPR;IPR011989;noIPR;noIPR;noIPR;noIPR;noIPR;noIPR;noIPR;noIPR;noIPR;noIPR;noIPR;noIPR;noIPR;noIPR;IPR039776;noIPR;IPR016024	;;;;;;;;;;;;;;;;;GO:0007064;;
Vitvi10g04128_t001	CBI33246.3unnamed protein product, partial	120	1	3.8e-25	1	Vitis vinifera	1
Vitvi10g02267_t001	XP_002275013.1 protein C2-DOMAIN ABA-RELATED 11	142	3	2.4e-81	0.7304	Vitis vinifera/Vitis riparia	0.8061	3	GO:0005634;GO:0005886;GO:0009738		IPR000008;IPR035892;noIPR;IPR044562;IPR044562;IPR035892	;;;;;
Vitvi10g02268_t001	XP_034697523.1DNA oxidative demethylase ALKBH2 isoform X2	244	6	1.2e-169	0.9966	Vitis riparia	1	4	GO:0006281;GO:0008168;GO:0016491;GO:0032259	EC:1;EC:2.1.1	IPR027450;IPR037151;noIPR;noIPR;noIPR;IPR032852;IPR005123;noIPR	;;;;;GO:0006281;;
Vitvi10g02269_t001	XP_003635396.1 acetyl-CoA acetyltransferase, cytosolic 1 isoform X1	411	6	1.9e-291	0.9988	Vitis vinifera	1	1	GO:0016747	EC:2.3.1	IPR002155;IPR002155;IPR020617;IPR020616;IPR016039;noIPR;noIPR;IPR020613;IPR020615;IPR020610;IPR002155;IPR016039;IPR016039	GO:0016747;GO:0016747;GO:0016747;GO:0016747;GO:0016746;;;GO:0016747;GO:0016747;GO:0016747;GO:0016747;GO:0016746;GO:0016746
Vitvi10g02269_t002	XP_010647163.1 acetyl-CoA acetyltransferase, cytosolic 1 isoform X2	404	6	4.2e-287	0.9983	Vitis vinifera	1	1	GO:0016747	EC:2.3.1	IPR020617;IPR016039;IPR002155;IPR002155;IPR020616;noIPR;noIPR;IPR020613;IPR020615;IPR020610;IPR002155;IPR016039;IPR016039	GO:0016747;GO:0016746;GO:0016747;GO:0016747;GO:0016747;;;GO:0016747;GO:0016747;GO:0016747;GO:0016747;GO:0016746;GO:0016746
Vitvi10g04129_t001	XP_034697732.1cellulose synthase-like protein E6	620	1	0	0.9968	Vitis riparia	0.9968	3	GO:0016020;GO:0016760;GO:0030244	EC:2.4.1.12	noIPR;IPR005150;IPR029044;noIPR;noIPR;IPR029044	;GO:0016760/GO:0030244/GO:0016020;;;;
Vitvi10g02386_t001	XP_003635559.1 cellulose synthase-like protein E6 isoform X1	734	3	0	0.9959	Vitis vinifera	0.9986	3	GO:0016020;GO:0016760;GO:0030244	EC:2.4.1.12	IPR029044;IPR005150;noIPR;noIPR;IPR029044	;GO:0016760/GO:0030244/GO:0016020;;;
Vitvi10g02386_t002	XP_003635559.1 cellulose synthase-like protein E6 isoform X1	763	3	0	0.958	Vitis vinifera	0.9607	3	GO:0016020;GO:0016760;GO:0030244	EC:2.4.1.12	IPR005150;IPR029044;noIPR;noIPR;IPR029044	GO:0016760/GO:0030244/GO:0016020;;;;
Vitvi10g02386_t003	RVW87173.1Cellulose synthase-like protein E6	529	8	0	0.9391	Vitis vinifera	0.9433	3	GO:0016021;GO:0016760;GO:0030244	EC:2.4.1.12	IPR005150;IPR029044;noIPR;noIPR;noIPR	GO:0016760/GO:0030244/GO:0016020;;;;
Vitvi10g02386_t004	RVW87173.1Cellulose synthase-like protein E6	500	8	0	0.9946	Vitis vinifera	0.998	3	GO:0016021;GO:0016760;GO:0030244	EC:2.4.1.12	IPR005150;IPR029044;noIPR;noIPR;IPR029044	GO:0016760/GO:0030244/GO:0016020;;;;
Vitvi10g02386_t005	XP_003635559.1 cellulose synthase-like protein E6 isoform X1	425	8	5.8E-313	0.9968	Vitis vinifera	0.9976	3	GO:0016021;GO:0016760;GO:0030244	EC:2.4.1.12	IPR005150;noIPR;noIPR	GO:0016760/GO:0030244/GO:0016020;;
Vitvi10g02386_t006	XP_003635559.1 cellulose synthase-like protein E6 isoform X1	454	8	7.9e-307	0.933	Vitis vinifera	0.9339	3	GO:0016021;GO:0016760;GO:0030244	EC:2.4.1.12	IPR005150;noIPR;noIPR	GO:0016760/GO:0030244/GO:0016020;;
Vitvi10g04130_t001	XP_003635559.1 cellulose synthase-like protein E6 isoform X1	127	11	5.6e-48	0.7638	Vitis vinifera	0.7692	6	GO:0000272;GO:0004553;GO:0016020;GO:0016757;GO:0030243;GO:0044248	EC:2.4;EC:3.2.1	noIPR;noIPR	;
Vitvi10g04131_t001	RVW87176.1Cellulose synthase-like protein E2	146	1	5.4e-103	0.9862	Vitis vinifera	0.9862	3	GO:0016021;GO:0016760;GO:0030244	EC:2.4.1.12	noIPR;noIPR;noIPR;noIPR	;;;
Vitvi10g04132_t001	CBI29433.3unnamed protein product, partial	189	1	1.9e-112	1	Vitis vinifera	1	3	GO:0016020;GO:0016760;GO:0030244	EC:2.4.1.12	IPR005150;noIPR;noIPR	GO:0016760/GO:0030244/GO:0016020;;
Vitvi10g02282_t001	XP_002269728.2 cellulose synthase-like protein E6	735	7	0	0.9841	Vitis vinifera	1	3	GO:0016021;GO:0016760;GO:0030244	EC:2.4.1.12	IPR029044;IPR005150;noIPR;noIPR;IPR029044	;GO:0016760/GO:0030244/GO:0016020;;;
Vitvi10g02283_t001	CBI29434.3unnamed protein product, partial	632	1	0	0.9984	Vitis vinifera	0.9984	8	GO:0005802;GO:0005886;GO:0009833;GO:0016021;GO:0016760;GO:0030244;GO:0051753;GO:0097502	EC:2.4.1.12	IPR005150;IPR029044;noIPR;noIPR	GO:0016760/GO:0030244/GO:0016020;;;
Vitvi10g02284_t002	XP_003635328.1 cellulose synthase-like protein E6	679	7	0	0.9813	Vitis vinifera	1	8	GO:0005802;GO:0005886;GO:0009833;GO:0016021;GO:0016760;GO:0030244;GO:0051753;GO:0097502	EC:2.4.1.12	IPR005150;IPR029044;noIPR;noIPR;IPR029044	GO:0016760/GO:0030244/GO:0016020;;;;
Vitvi10g02284_t001	XP_003635328.1 cellulose synthase-like protein E6	735	7	0	0.9633	Vitis vinifera	0.9782	8	GO:0005802;GO:0005886;GO:0009833;GO:0016021;GO:0016760;GO:0030244;GO:0051753;GO:0097502	EC:2.4.1.12	IPR029044;IPR005150;noIPR;noIPR;IPR029044	;GO:0016760/GO:0030244/GO:0016020;;;
Vitvi10g04133_t001	RVW87153.1Sister chromatid cohesion protein PDS5-like B-B	324	7	1.6e-199	0.988	Vitis vinifera	0.9935	3	GO:0005634;GO:0007064;GO:0051301		noIPR;IPR039776;noIPR;IPR016024	;GO:0007064;;
Vitvi10g04134_t001	XP_003635499.2 sister chromatid cohesion protein PDS5 homolog B	696	5	0	0.9855	Vitis vinifera	0.991	4	GO:0005634;GO:0007064;GO:0008270;GO:0051301		noIPR;IPR032867;noIPR;noIPR;noIPR;noIPR;noIPR;noIPR;noIPR;noIPR;noIPR;noIPR;IPR039776;IPR039776;noIPR;IPR002999;noIPR	;GO:0008270;;;;;;;;;;;GO:0007064;GO:0007064;;;
Vitvi10g00275_t001	RVW87180.1Calcium-transporting ATPase 12, plasma membrane-type	842	2	0	0.9347	Vitis vinifera	0.9371	4	GO:0005388;GO:0005524;GO:0016021;GO:0070588	EC:7.2.2.10	noIPR;IPR006068;noIPR;noIPR;IPR023299;IPR023214;IPR023299;noIPR;noIPR;IPR006408;noIPR;noIPR;IPR036412;IPR023298;IPR008250;IPR023299	;;;;GO:0000166;;GO:0000166;;;GO:0070588/GO:0016020/GO:0005388/GO:0005524;;;;;;GO:0000166
Vitvi10g00274_t001	RVW87183.1Calcium-transporting ATPase 12, plasma membrane-type	1145	2	0	0.9619	Vitis vinifera	0.9493	4	GO:0005388;GO:0005524;GO:0016021;GO:0070588	EC:7.2.2.10	noIPR;IPR023299;noIPR;noIPR;IPR023214;noIPR;noIPR;IPR006068;noIPR;noIPR;noIPR;noIPR;IPR036412;IPR023298;IPR023299;IPR008250	;GO:0000166;;;;;;;;;;;;;GO:0000166;
Vitvi10g04135_t001	---NA---	148
Vitvi10g04136_t001	XP_034697322.1putative calcium-transporting ATPase 13, plasma membrane-type	168	2	3.3e-71	0.9764	Vitis riparia	0.9811				noIPR;IPR006068;noIPR;noIPR;IPR023298	;;;;
Vitvi10g04137_t001	---NA---	90
Vitvi10g00271_t001	RVW87184.1Scarecrow-like protein 13	545	4	0	0.9959	Vitis vinifera	1	4	GO:0003700;GO:0005634;GO:0006355;GO:0043565		IPR005202;noIPR;noIPR;IPR030005;IPR005202;IPR005202	;;;;;
Vitvi10g00270_t001	XP_010647039.1 probable WRKY transcription factor 20 isoform X1	626	3	0	0.9921	Vitis vinifera	0.9984	4	GO:0003700;GO:0005634;GO:0006355;GO:0043565		IPR003657;IPR036576;IPR036576;IPR003657;noIPR;noIPR;noIPR;noIPR;IPR044810;noIPR;IPR003657;IPR003657;IPR036576;IPR036576	GO:0003700/GO:0043565/GO:0006355;GO:0003700/GO:0043565/GO:0006355;GO:0003700/GO:0043565/GO:0006355;GO:0003700/GO:0043565/GO:0006355;;;;;GO:0003700;;GO:0003700/GO:0043565/GO:0006355;GO:0003700/GO:0043565/GO:0006355;GO:0003700/GO:0043565/GO:0006355;GO:0003700/GO:0043565/GO:0006355
Vitvi10g04138_t001	XP_010647441.1PREDICTED: uncharacterized protein LOC104878571	213	2	5.8e-123	0.9883	Vitis vinifera	0.9953				noIPR;noIPR;noIPR;noIPR	;;;
Vitvi10g04139_t001	RVW33623.1putative pumilio-like 7, chloroplastic	568	2	0	0.9862	Vitis vinifera	0.9901	2	GO:0003723;GO:0006417		IPR001313;IPR011989;IPR001313;noIPR;noIPR;noIPR;IPR001313;IPR001313;IPR001313;IPR033133;IPR033712;IPR016024	GO:0003723;;GO:0003723;;;;GO:0003723;GO:0003723;GO:0003723;GO:0003723;GO:0003723;
Vitvi10g00278_t001	RVW33619.1Pentatricopeptide repeat-containing protein, mitochondrial	715	2	2e-142	0.9953	Vitis vinifera	0.9953	1	GO:0005515		IPR011990;IPR011990;IPR002885;IPR011990;IPR002885;IPR002885;noIPR;noIPR;IPR002885;IPR002885;IPR002885;IPR002885;IPR002885;IPR002885;IPR002885;IPR002885;IPR002885;IPR002885;IPR002885;IPR002885;IPR002885;IPR002885;IPR011990	GO:0005515;GO:0005515;;GO:0005515;;;;;;;;;;;;;;;;;;;GO:0005515
Vitvi10g04140_t001	XP_034698670.1thymidine kinase a-like	283	2	1.3e-197	0.9929	Vitis riparia	0.9965	2	GO:0004797;GO:0005524	EC:2.7.1.145;EC:2.7.1.21	noIPR;IPR001267;IPR027417;noIPR;IPR001267;noIPR;IPR020633;noIPR;IPR027417	;GO:0005524/GO:0004797;;;GO:0005524/GO:0004797;;GO:0005524/GO:0004797;;
Vitvi10g04141_t001	XP_034698450.1heterogeneous nuclear ribonucleoprotein 1-like	479	2	0	0.9875	Vitis riparia	0.9749	1	GO:0003723		IPR000504;IPR012677;IPR000504;IPR012677;noIPR;noIPR;IPR000504;IPR000504;noIPR;IPR034131;IPR035979;IPR035979	GO:0003676;;GO:0003676;;;;GO:0003676;GO:0003676;;GO:0003723;GO:0003676;GO:0003676
Vitvi10g00282_t001	XP_002268209.3 putative yippee-like protein Os10g0369500	111	1	7.3e-79	1	Vitis vinifera/Vitis riparia	1				IPR004910;IPR039058;noIPR;IPR034751	;;;
Vitvi10g04142_t001	XP_010655425.1 ras-related protein RABA5a	225	1	6.3e-158	1	Vitis vinifera/Vitis riparia	1	2	GO:0003924;GO:0005525	EC:3.6.1	noIPR;IPR001806;noIPR;noIPR;noIPR;IPR001806;IPR027417;IPR005225;noIPR;noIPR;IPR001806;noIPR;noIPR;noIPR;IPR027417	;GO:0005525/GO:0003924;;;;GO:0005525/GO:0003924;;GO:0005525;;;GO:0005525/GO:0003924;;;;
Vitvi10g00288_t001	XP_002267982.1 inositol transporter 4	585	3	0	0.9989	Vitis vinifera	1	4	GO:0005366;GO:0015798;GO:0016021;GO:0055085	EC:7	noIPR;IPR003663;IPR005828;IPR003663;IPR036259;IPR036259;noIPR;noIPR;noIPR;IPR005829;IPR020846;noIPR;IPR036259	;GO:0055085/GO:0022857/GO:0016020;GO:0016021/GO:0055085/GO:0022857;GO:0055085/GO:0022857/GO:0016020;;;;;;GO:0016021/GO:0055085/GO:0022857;GO:0022857;;
Vitvi10g04143_t001	XP_003635632.1 U-box domain-containing protein 4	284	2	1.4e-48	0.9982	Vitis vinifera	1	3	GO:0005515;GO:0005634;GO:0005737		IPR000225;IPR011989;IPR000225;IPR011989;noIPR;noIPR;IPR000225;IPR000225;IPR000225;IPR016024	GO:0005515;;GO:0005515;;;;GO:0005515;GO:0005515;GO:0005515;
Vitvi10g04144_t001	XP_003635632.1 U-box domain-containing protein 4	166	2	1.2e-93	0.9455	Vitis vinifera	0.9455	2	GO:0005634;GO:0005737		noIPR;noIPR;noIPR	;;
Vitvi10g00286_t001	RVW33601.1Cytochrome b561 and DOMON domain-containing protein	396	4	3.9e-288	0.9987	Vitis vinifera	1	2	GO:0016021;GO:0046872		IPR006593;IPR005018;IPR006593;IPR017214;noIPR;noIPR;noIPR;IPR005018;noIPR;IPR006593;noIPR;noIPR	;;;;;;;;;;;
Vitvi10g00285_t001	XP_010655423.1 inositol monophosphatase 3	270	4	1.3e-193	0.977	Vitis vinifera	0.9963	7	GO:0006021;GO:0008934;GO:0046854;GO:0046855;GO:0046872;GO:0052832;GO:0052833	EC:3.1.3.25	IPR000760;IPR020552;noIPR;IPR000760;noIPR;noIPR;noIPR;IPR020583;IPR020550;IPR033942;noIPR	GO:0046855;GO:0046854;;GO:0046855;;;;;GO:0046854;GO:0008934/GO:0046855;
Vitvi10g00285_t002	XP_010655423.1 inositol monophosphatase 3	270	4	1.3e-193	0.977	Vitis vinifera	0.9963	7	GO:0006021;GO:0008934;GO:0046854;GO:0046855;GO:0046872;GO:0052832;GO:0052833	EC:3.1.3.25	IPR000760;IPR020552;noIPR;IPR000760;noIPR;noIPR;noIPR;IPR020583;IPR020550;IPR033942;noIPR	GO:0046855;GO:0046854;;GO:0046855;;;;;GO:0046854;GO:0008934/GO:0046855;
Vitvi10g00284_t001	XP_002267661.1 putative MO25-like protein At5g47540	340	2	3.7e-228	0.9985	Vitis vinifera	1	3	GO:0035556;GO:0043539;GO:0071902		IPR013878;IPR011989;noIPR;IPR013878;IPR016024	;;;;
Vitvi10g00284_t002	XP_002267661.1 putative MO25-like protein At5g47540	317	2	8.2e-210	0.9984	Vitis vinifera	1	3	GO:0035556;GO:0043539;GO:0071902		IPR013878;IPR011989;IPR013878;noIPR;IPR016024	;;;;
Vitvi10g04145_t001	RVW33585.1Subtilisin-like protease SBT5.4	375	1	2.9e-230	0.7867	Vitis vinifera	0.7867	2	GO:0004252;GO:0006508	EC:3.4.21	noIPR;IPR036852;IPR000209;noIPR;IPR045051;noIPR;IPR045051;IPR036852	;GO:0004252/GO:0006508;GO:0008236/GO:0006508;;;;;GO:0004252/GO:0006508
Vitvi10g02300_t001	XP_010647020.1 subtilisin-like protease SBT5.3 isoform X1	771	5	0	0.9839	Vitis vinifera	0.9909	2	GO:0004252;GO:0006508	EC:3.4.21	IPR015500;IPR041469;IPR010259;IPR000209;IPR036852;IPR037045;IPR003137;noIPR;noIPR;noIPR;IPR045051;IPR023828;noIPR;noIPR;IPR034197;IPR036852	;;;GO:0008236/GO:0006508;GO:0004252/GO:0006508;;;;;;;;;;;GO:0004252/GO:0006508
Vitvi10g02302_t001	RVW33574.1Subtilisin-like protease SBT5.3	765	6	0	0.9772	Vitis vinifera	0.9961	2	GO:0004252;GO:0006508	EC:3.4.21	IPR015500;IPR000209;noIPR;IPR010259;IPR036852;noIPR;IPR037045;IPR041469;IPR003137;noIPR;IPR045051;IPR023828;noIPR;IPR034197;noIPR;IPR036852	;GO:0008236/GO:0006508;;;GO:0004252/GO:0006508;;;;;;;;;;;GO:0004252/GO:0006508
Vitvi10g02298_t001	RVW33573.1Subtilisin-like protease SBT5.3	1821	1	0	0.9397	Vitis vinifera	0.9397	2	GO:0004252;GO:0006508	EC:3.4.21	IPR015500;IPR037045;IPR000209;noIPR;noIPR;IPR041469;IPR010259;IPR000209;IPR036852;IPR036852;IPR000209;noIPR;IPR003137;IPR036852;noIPR;noIPR;IPR045051;IPR045051;IPR045051;noIPR;IPR023828;IPR023828;IPR023828;noIPR;noIPR;IPR034197;IPR034197;noIPR;noIPR;noIPR;IPR036852;IPR036852;IPR036852	;;GO:0006508/GO:0008236;;;;;GO:0006508/GO:0008236;GO:0006508/GO:0004252;GO:0006508/GO:0004252;GO:0006508/GO:0008236;;;GO:0006508/GO:0004252;;;;;;;;;;;;;;;;;GO:0006508/GO:0004252;GO:0006508/GO:0004252;GO:0006508/GO:0004252
Vitvi10g04146_t001	CAN77862.1hypothetical protein VITISV_022393	753	1	0	0.9532	Vitis vinifera	0.9532	2	GO:0004252;GO:0006508	EC:3.4.21	IPR015500;IPR010259;IPR037045;IPR000209;noIPR;IPR036852;IPR003137;noIPR;IPR041469;IPR045051;noIPR;noIPR;IPR034197;noIPR;IPR036852	;;;GO:0008236/GO:0006508;;GO:0004252/GO:0006508;;;;;;;;;GO:0004252/GO:0006508
Vitvi10g04147_t001	CAN68730.1hypothetical protein VITISV_024816	154	1	1.3e-11	0.9024	Vitis vinifera	0.9024				noIPR;noIPR	;
Vitvi10g02296_t001	RVW87118.1Subtilisin-like protease SBT5.4	764	3	0	0.9974	Vitis vinifera	0.9987	2	GO:0004252;GO:0006508	EC:3.4.21	IPR015500;IPR036852;IPR000209;IPR037045;IPR010259;IPR003137;noIPR;IPR041469;noIPR;noIPR;noIPR;IPR023828;noIPR;IPR034197;noIPR;IPR036852;noIPR	;GO:0004252/GO:0006508;GO:0008236/GO:0006508;;;;;;;;;;;;;GO:0004252/GO:0006508;
Vitvi10g02295_t001	XP_002269491.2 probable galactinol--sucrose galactosyltransferase 2	789	2	0	0.9956	Vitis vinifera	0.9975	2	GO:0003824;GO:0005975		IPR013785;IPR008811;IPR008811;noIPR;IPR017853	GO:0003824;;;;
Vitvi10g04148_t001	XP_003635585.2 ras-related protein RABB1c	211	20	4.3e-149	0.9941	Vitis vinifera/Vitis riparia	1	5	GO:0003924;GO:0005525;GO:0005773;GO:0005794;GO:0005886	EC:3.6.1	noIPR;IPR001806;noIPR;noIPR;noIPR;IPR001806;IPR027417;IPR005225;noIPR;noIPR;noIPR;noIPR;IPR001806;noIPR;noIPR;IPR027417	;GO:0005525/GO:0003924;;;;GO:0005525/GO:0003924;;GO:0005525;;;;;GO:0005525/GO:0003924;;;
Vitvi10g00304_t001	XP_002269564.2 enhancer of mRNA-decapping protein 4	1373	3	0	0.9827	Vitis vinifera	0.9949	3	GO:0000932;GO:0005515;GO:0031087		noIPR;IPR001680;IPR015943;IPR044938;IPR032401;noIPR;noIPR;noIPR;noIPR;noIPR;noIPR;noIPR;noIPR;IPR045152;IPR001680;noIPR;IPR001680;IPR036322	;GO:0005515;GO:0005515;;;;;;;;;;;GO:0031087;GO:0005515;;GO:0005515;GO:0005515
Vitvi10g00306_t001	XP_010647024.1 pentatricopeptide repeat-containing protein At3g24000, mitochondrial	661	3	0	0.9592	Vitis vinifera	0.997	2	GO:0005515;GO:0008270		IPR002885;IPR002885;IPR011990;IPR011990;IPR002885;IPR032867;noIPR;noIPR;IPR002885;IPR002885;IPR002885;IPR002885;IPR002885;IPR011990	;;GO:0005515;GO:0005515;;GO:0008270;;;;;;;;GO:0005515
Vitvi10g04149_t001	CAN70212.1hypothetical protein VITISV_038740	72	1	2.4e-35	0.9583	Vitis vinifera	0.9583	1	GO:0008270
Vitvi10g00307_t001	XP_010647025.1 probable galacturonosyltransferase 4 isoform X1	638	7	0	0.9973	Vitis vinifera	1	5	GO:0000139;GO:0016021;GO:0045489;GO:0047262;GO:0071555	EC:2.4.1.43	noIPR;noIPR;IPR002495;IPR029044;noIPR;noIPR;noIPR;noIPR;noIPR;IPR029993;noIPR;IPR029044	;;GO:0016757;;;;;;;GO:0047262;;
Vitvi10g00307_t002	XP_010647025.1 probable galacturonosyltransferase 4 isoform X1	638	7	0	0.9973	Vitis vinifera	1	5	GO:0000139;GO:0016021;GO:0045489;GO:0047262;GO:0071555	EC:2.4.1.43	noIPR;noIPR;IPR002495;IPR029044;noIPR;noIPR;noIPR;noIPR;noIPR;IPR029993;noIPR;IPR029044	;;GO:0016757;;;;;;;GO:0047262;;
Vitvi10g00307_t003	XP_010647025.1 probable galacturonosyltransferase 4 isoform X1	638	7	0	0.9973	Vitis vinifera	1	5	GO:0000139;GO:0016021;GO:0045489;GO:0047262;GO:0071555	EC:2.4.1.43	noIPR;noIPR;IPR002495;IPR029044;noIPR;noIPR;noIPR;noIPR;noIPR;IPR029993;noIPR;IPR029044	;;GO:0016757;;;;;;;GO:0047262;;
Vitvi10g04150_t001	RVW33578.1putative disease resistance protein	902	4	0	0.9903	Vitis vinifera	0.9945	2	GO:0006952;GO:0043531		noIPR;IPR002182;IPR027417;IPR032675;noIPR;IPR041118;IPR036388;IPR042197;IPR044974;noIPR;IPR038005;noIPR;IPR027417	;GO:0043531;;;;;;;GO:0006952;;;;
Vitvi10g04151_t001	XP_034697703.1probable E3 ubiquitin-protein ligase EDA40 isoform X1	292	4	5.1e-125	0.773	Vitis vinifera	0.7661				IPR001841;IPR001841;IPR013083;noIPR;noIPR;noIPR;noIPR;IPR001841;noIPR;noIPR	;;;;;;;;;
Vitvi10g04152_t001	XP_034697704.1probable E3 ubiquitin-protein ligase EDA40 isoform X2	150	5	1.9e-101	0.9801	Vitis riparia	0.9801				noIPR;noIPR	;
Vitvi10g04153_t001	XP_019074068.1 protein PHR1-LIKE 2	311	5	1.7e-207	0.9664	Vitis vinifera	0.9968	3	GO:0003677;GO:0003700;GO:0005634		IPR025756;IPR006447;IPR017930;noIPR;noIPR;noIPR;IPR044848;IPR017930;IPR009057	;GO:0003677;;;;;GO:0003700;;
Vitvi10g04153_t002	XP_034697714.1protein PHR1-LIKE 2-like isoform X2	310	5	3.1e-205	0.9638	Vitis riparia	0.9903	3	GO:0003677;GO:0003700;GO:0005634		IPR025756;IPR006447;IPR017930;noIPR;noIPR;noIPR;IPR044848;IPR017930;IPR009057	;GO:0003677;;;;;GO:0003700;;
Vitvi10g04153_t003	XP_034697715.1protein PHR1-LIKE 2-like isoform X3	308	5	1.8e-203	0.9608	Vitis riparia	0.9903	3	GO:0003677;GO:0003700;GO:0005634		IPR006447;noIPR;IPR017930;IPR025756;noIPR;noIPR;noIPR;IPR044848;noIPR;IPR017930;IPR009057	GO:0003677;;;;;;;GO:0003700;;;
Vitvi10g04154_t001	---NA---	77									noIPR
Vitvi10g00302_t001	XP_010647085.1 myb family transcription factor PHL7 isoform X1	336	5	4e-221	0.9923	Vitis vinifera	1	3	GO:0003677;GO:0003700;GO:0005634		noIPR;IPR006447;IPR025756;IPR017930;noIPR;noIPR;noIPR;noIPR;IPR044848;noIPR;IPR017930;IPR009057	;GO:0003677;;;;;;;GO:0003700;;;
Vitvi10g04155_t001	XP_019074065.1PREDICTED: uncharacterized protein LOC100242843	445	2	0	0.9989	Vitis vinifera	1				IPR029058;IPR022742;noIPR;noIPR;IPR029058	;;;;
Vitvi10g04156_t001	RVW87144.1putative ribonuclease H protein	183	1	1.1e-71	0.8828	Vitis vinifera	0.8828
Vitvi10g04157_t001	RVW87144.1putative ribonuclease H protein	91	1	4.8e-18	0.9111	Vitis vinifera	0.9111
Vitvi10g04158_t001	RVW13845.1G-type lectin S-receptor-like serine/threonine-protein kinase	452	2	1.2e-110	0.8178	Vitis vinifera	0.8186	6	GO:0004674;GO:0005524;GO:0006468;GO:0016021;GO:0030246;GO:0048544	EC:2.7.1	IPR036426;IPR021820;IPR001480;noIPR;noIPR;IPR036426	;GO:0004674;;;;
Vitvi10g04159_t001	CAN62798.1hypothetical protein VITISV_006014	138	1	1.5e-14	0.6098	Vitis vinifera	0.6098
Vitvi10g02133_t001	XP_010646877.1 G-type lectin S-receptor-like serine/threonine-protein kinase At1g11330 isoform X1	826	9	0	0.9863	Vitis vinifera	1	8	GO:0005524;GO:0005886;GO:0006468;GO:0016021;GO:0030246;GO:0048544;GO:0106310;GO:0106311	EC:2.7.11.1	IPR003609;IPR000719;IPR001480;IPR001245;noIPR;IPR003609;IPR000858;IPR001480;IPR036426;IPR024171;IPR021820;noIPR;noIPR;noIPR;noIPR;noIPR;noIPR;IPR008271;noIPR;IPR000742;IPR001480;IPR000719;IPR003609;IPR001480;noIPR;noIPR;IPR036426;IPR011009	;GO:0005524/GO:0004672/GO:0006468;;GO:0004672/GO:0006468;;;GO:0048544;;;GO:0004674;GO:0004674;;;;;;;GO:0004672/GO:0006468;;;;GO:0005524/GO:0004672/GO:0006468;;;;;;
Vitvi10g04160_t001	XP_010646876.1 G-type lectin S-receptor-like serine/threonine-protein kinase At1g11330	638	8	0	0.7587	Vitis vinifera	0.7716	5	GO:0000166;GO:0004674;GO:0016020;GO:0016310;GO:0048544	EC:2.7.1	IPR001480;IPR003609;IPR001480;IPR000858;IPR003609;IPR036426;noIPR;IPR021820;noIPR;noIPR;noIPR;noIPR;IPR003609;IPR000742;IPR001480;noIPR;IPR001480;noIPR;noIPR;IPR011009;IPR036426	;;;GO:0048544;;;;GO:0004674;;;;;;;;;;;;;
Vitvi10g02135_t001	RVW76138.1G-type lectin S-receptor-like serine/threonine-protein kinase B120	1378	2	0	0.727	Vitis vinifera	0.692	5	GO:0004674;GO:0005488;GO:0016020;GO:0016310;GO:0048544	EC:2.7.1	IPR001480;IPR003609;IPR001480;noIPR;IPR036426;noIPR;IPR003609;IPR000858;IPR021820;noIPR;noIPR;noIPR;noIPR;noIPR;noIPR;noIPR;noIPR;IPR001480;IPR003609;IPR000742;IPR001480;IPR003609;noIPR;noIPR;noIPR;IPR001480;IPR001480;IPR036426;IPR011009;IPR036426;IPR036426	;;;;;;;GO:0048544;GO:0004674;;;;;;;;;;;;;;;;;;;;;;
Vitvi10g04161_t001	RVW76148.1Receptor-like serine/threonine-protein kinase SD1-8	467	1	4.1e-308	0.7045	Vitis vinifera	0.7045	2	GO:0016301;GO:0048544	EC:2.7	IPR001480;IPR000858;IPR003609;IPR036426;IPR001480;noIPR;noIPR;noIPR;noIPR;noIPR;noIPR;noIPR;IPR001480;IPR003609;IPR001480;noIPR;IPR011009;IPR036426	;GO:0048544;;;;;;;;;;;;;;;;
Vitvi10g04162_t001	CAN61488.1hypothetical protein VITISV_038129	64	1	4.1e-24	0.9767	Vitis vinifera	0.9767
Vitvi10g04163_t001	CAN61487.1hypothetical protein VITISV_038128	944	1	0	0.815	Vitis vinifera	0.815	5	GO:0004674;GO:0005524;GO:0006468;GO:0016021;GO:0048544	EC:2.7.1	IPR001480;IPR003609;noIPR;IPR021820;IPR003609;IPR024171;IPR000858;IPR036426;IPR001480;noIPR;noIPR;noIPR;noIPR;noIPR;noIPR;noIPR;IPR000742;IPR001480;IPR003609;noIPR;noIPR;IPR001480;IPR036426;IPR011009	;;;GO:0004674;;GO:0004674;GO:0048544;;;;;;;;;;;;;;;;;
Vitvi10g04164_t001	RVW13881.1Transposon TX1 uncharacterized 149 kDa protein	159	1	2.8e-110	1	Vitis vinifera	1
Vitvi10g04165_t001	RVW29059.1Transposon TX1 uncharacterized 149 kDa protein	125	2	1.2e-53	0.8445	Vitis vinifera	0.8403				noIPR
Vitvi10g04166_t001	RVW63868.1E3 ubiquitin-protein ligase UPL2	256	2	2.5e-148	0.9751	Vitis vinifera	0.9751	4	GO:0000045;GO:0010150;GO:0042742;GO:0050832
Vitvi10g04167_t001	CAN73147.1hypothetical protein VITISV_020391	142	1	6.3e-65	0.9828	Vitis vinifera	0.9828	4	GO:0000045;GO:0010150;GO:0042742;GO:0050832		noIPR
Vitvi10g02145_t001	RVW89905.1KH domain-containing protein	96	4	1.9e-48	0.7015	Vitis vinifera	0.7015	4	GO:0003729;GO:0005634;GO:0005737;GO:0010468		noIPR;noIPR	;
Vitvi10g04168_t001	CAN73147.1hypothetical protein VITISV_020391	52	2	6.2e-13	0.9342	Vitis vinifera	0.9474	4	GO:0000045;GO:0010150;GO:0042742;GO:0050832
Vitvi10g04169_t001	CAN73147.1hypothetical protein VITISV_020391	70	1	5.1e-33	0.9429	Vitis vinifera	0.9429	4	GO:0000045;GO:0010150;GO:0042742;GO:0050832
Vitvi10g04170_t001	CBI20406.3unnamed protein product, partial	71	1	1e-37	0.9155	Vitis vinifera	0.9155
Vitvi10g04171_t001	XP_034709373.1 eukaryotic translation initiation factor 4G-like	146	1	4.8e-12	0.8333	Vitis riparia	0.8333
Vitvi10g04172_t001	RVX01174.1hypothetical protein CK203_036201	561	4	0	0.8787	Vitis vinifera	0.8805	6	GO:0003677;GO:0004519;GO:0005768;GO:0005802;GO:0006281;GO:0090305	EC:3.1	noIPR;IPR025558;noIPR;noIPR;noIPR;noIPR	;;;;;
Vitvi10g04173_t001	RVW76148.1Receptor-like serine/threonine-protein kinase SD1-8	153	2	5.6e-109	1	Vitis vinifera	1	6	GO:0004674;GO:0005524;GO:0006468;GO:0016020;GO:0030246;GO:0048544	EC:2.7.1	IPR000858;IPR003609;noIPR;noIPR;IPR003609;noIPR	GO:0048544;;;;;
Vitvi10g04174_t001	XP_019073877.1 receptor-like serine/threonine-protein kinase SD1-8	129	3	2.2e-68	0.9843	Vitis vinifera	1	5	GO:0004674;GO:0005524;GO:0006468;GO:0016020;GO:0048544	EC:2.7.1	IPR021820;noIPR;noIPR;noIPR;IPR011009	GO:0004674;;;;
Vitvi10g04175_t001	RVW76171.1G-type lectin S-receptor-like serine/threonine-protein kinase	618	3	0	0.7789	Vitis vinifera	0.806	7	GO:0005524;GO:0006468;GO:0016021;GO:0030246;GO:0048544;GO:0106310;GO:0106311	EC:2.7.11.1	IPR003609;IPR001480;IPR000858;IPR036426;IPR021820;noIPR;IPR003609;IPR001480;noIPR;noIPR;noIPR;noIPR;IPR000742;IPR003609;IPR001480;IPR001480;noIPR;IPR011009;IPR036426	;;GO:0048544;;GO:0004674;;;;;;;;;;;;;;
Vitvi10g04176_t001	RVW13882.1G-type lectin S-receptor-like serine/threonine-protein kinase	403	1	2.1e-173	0.7474	Vitis vinifera	0.7474	4	GO:0004674;GO:0005524;GO:0006468;GO:0016020	EC:2.7.1	IPR003609;IPR001245;noIPR;IPR021820;noIPR;noIPR;noIPR;noIPR;noIPR;noIPR;noIPR;IPR000719;noIPR;IPR011009	;GO:0004672/GO:0006468;;GO:0004674;;;;;;;;GO:0005524/GO:0004672/GO:0006468;;
Vitvi10g04177_t001	XP_010652351.1PREDICTED: uncharacterized protein LOC104879812	210	1	1e-97	0.8392	Vitis vinifera	0.8392				noIPR;noIPR	;
Vitvi10g02151_t001	XP_019073873.1 G-type lectin S-receptor-like serine/threonine-protein kinase At1g11410 isoform X1	823	3	0	0.9805	Vitis vinifera	0.9988	6	GO:0004674;GO:0005524;GO:0006468;GO:0016021;GO:0030246;GO:0048544	EC:2.7.1	IPR001480;IPR003609;IPR000719;IPR000858;IPR021820;IPR001480;IPR003609;noIPR;IPR036426;IPR001245;IPR024171;noIPR;noIPR;noIPR;noIPR;noIPR;noIPR;IPR008271;IPR001480;IPR000719;IPR003609;IPR000742;noIPR;IPR001480;noIPR;IPR036426;IPR011009	;;GO:0005524/GO:0004672/GO:0006468;GO:0048544;GO:0004674;;;;;GO:0004672/GO:0006468;GO:0004674;;;;;;;GO:0004672/GO:0006468;;GO:0005524/GO:0004672/GO:0006468;;;;;;;
Vitvi10g02151_t002	XP_019073873.1 G-type lectin S-receptor-like serine/threonine-protein kinase At1g11410 isoform X1	679	5	0	0.9835	Vitis vinifera	0.9985	6	GO:0004672;GO:0005524;GO:0006468;GO:0016021;GO:0030246;GO:0048544	EC:2.7.1	IPR003609;IPR000719;IPR001480;noIPR;IPR003609;noIPR;IPR036426;IPR001245;IPR000858;IPR001480;noIPR;noIPR;noIPR;noIPR;IPR008271;IPR001480;IPR000719;IPR003609;IPR000742;noIPR;IPR001480;noIPR;IPR036426;IPR011009	;GO:0005524/GO:0004672/GO:0006468;;;;;;GO:0004672/GO:0006468;GO:0048544;;;;;;GO:0004672/GO:0006468;;GO:0005524/GO:0004672/GO:0006468;;;;;;;
Vitvi10g02151_t003	XP_019073873.1 G-type lectin S-receptor-like serine/threonine-protein kinase At1g11410 isoform X1	679	5	0	0.9835	Vitis vinifera	0.9985	6	GO:0004672;GO:0005524;GO:0006468;GO:0016021;GO:0030246;GO:0048544	EC:2.7.1	IPR003609;IPR000719;IPR001480;noIPR;IPR003609;noIPR;IPR036426;IPR001245;IPR000858;IPR001480;noIPR;noIPR;noIPR;noIPR;IPR008271;IPR001480;IPR000719;IPR003609;IPR000742;noIPR;IPR001480;noIPR;IPR036426;IPR011009	;GO:0005524/GO:0004672/GO:0006468;;;;;;GO:0004672/GO:0006468;GO:0048544;;;;;;GO:0004672/GO:0006468;;GO:0005524/GO:0004672/GO:0006468;;;;;;;
Vitvi10g04178_t001	RVW13832.1G-type lectin S-receptor-like serine/threonine-protein kinase	87	2	1e-56	0.9888	Vitis vinifera	1	6	GO:0004672;GO:0005524;GO:0006468;GO:0016021;GO:0030246;GO:0048544	EC:2.7.1	IPR000858;noIPR;noIPR	GO:0048544;;
Vitvi10g04179_t001	XP_019073875.1 G-type lectin S-receptor-like serine/threonine-protein kinase RKS1 isoform X1	399	2	6.7e-253	0.9885	Vitis vinifera	0.9971	1	GO:0048544		IPR003609;IPR003609;noIPR;IPR000858;noIPR;noIPR;noIPR;IPR003609;noIPR;IPR011009	;;;GO:0048544;;;;;;
Vitvi10g04180_t001	CAN66867.1hypothetical protein VITISV_035828	105	1	2.8e-44	0.9762	Vitis vinifera	0.9762	5	GO:0004674;GO:0005524;GO:0006468;GO:0016021;GO:0048544	EC:2.7.1
Vitvi10g04181_t001	RVW13886.1G-type lectin S-receptor-like serine/threonine-protein kinase RKS1	74	2	2.7e-06	0.7866	Vitis vinifera	0.7838
Vitvi10g04182_t001	RVW86382.1G-type lectin S-receptor-like serine/threonine-protein kinase	59	2	1.3e-13	0.7213	Vitis vinifera	0.7213	3	GO:0000166;GO:0004674;GO:0016310	EC:2.7.1
Vitvi10g04183_t001	XP_010646737.1 G-type lectin S-receptor-like serine/threonine-protein kinase At1g11410 isoform X2	394	6	3.9e-243	0.9854	Vitis vinifera	1	5	GO:0004674;GO:0005524;GO:0006468;GO:0016021;GO:0048544	EC:2.7.1	noIPR;IPR003609;noIPR;IPR003609;IPR000858;noIPR;noIPR;noIPR;IPR000152;IPR003609;IPR000742;noIPR;noIPR;IPR011009	;;;;GO:0048544;;;;;;;;;
Vitvi10g04184_t001	CAN66867.1hypothetical protein VITISV_035828	90	1	3.8e-14	0.746	Vitis vinifera	0.746	4	GO:0000166;GO:0004672;GO:0016020;GO:0016310	EC:2.7.1
Vitvi10g04185_t001	RVW13886.1G-type lectin S-receptor-like serine/threonine-protein kinase RKS1	97	1	1.1e-09	0.5732	Vitis vinifera	0.5732	1	GO:0004672	EC:2.7.1
Vitvi10g04186_t001	XP_010647104.1 G-type lectin S-receptor-like serine/threonine-protein kinase At1g11410	202	2	8.1e-154	0.9975	Vitis vinifera	1	4	GO:0016301;GO:0016310;GO:0030246;GO:0048544	EC:2.7	IPR000858;noIPR;noIPR;noIPR;IPR036426	GO:0048544;;;;
Vitvi10g04187_t001	RVW31421.1Transposon Ty3-G Gag-Pol polyprotein	439	3	9.4e-209	0.5	Vitis vinifera	0.5681	3	GO:0003676;GO:0003824;GO:0015074		noIPR;IPR021109;noIPR;IPR036397;IPR041588;noIPR;IPR001584;noIPR;IPR012337	;;;GO:0003676;;;GO:0015074;;
Vitvi10g04188_t001	RVW97569.1Transposon Ty3-G Gag-Pol polyprotein	214	1	2.6e-139	0.9953	Vitis vinifera	0.9953	8	GO:0003676;GO:0003964;GO:0004190;GO:0004519;GO:0006278;GO:0006508;GO:0015074;GO:0090305	EC:3.4.23;EC:3.1;EC:2.7.7.49	noIPR;noIPR;IPR016197	;;
Vitvi10g04189_t001	XP_034696967.1G-type lectin S-receptor-like serine/threonine-protein kinase At1g11410 isoform X3	383	3	7.7e-250	0.6577	Vitis riparia	0.7404	3	GO:0004674;GO:0005488;GO:0048544	EC:2.7.1	IPR003609;IPR000858;IPR003609;noIPR;noIPR;noIPR;noIPR;noIPR;noIPR;IPR003609;noIPR;noIPR;IPR036426	;GO:0048544;;;;;;;;;;;
Vitvi10g04190_t001	RVX08019.1hypothetical protein CK203_014894	159	8	4.2e-29	0.9647	Vitis vinifera	0.9672	1	GO:0016021		noIPR;noIPR;noIPR;noIPR	;;;
Vitvi10g04191_t001	XP_010647032.1 G-type lectin S-receptor-like serine/threonine-protein kinase At1g11410	480	1	0	0.7059	Vitis vinifera	0.7059	2	GO:0004674;GO:0048544	EC:2.7.1	IPR003609;IPR003609;IPR021820;noIPR;IPR000858;noIPR;noIPR;IPR000152;IPR000742;IPR003609;noIPR;noIPR;IPR011009	;;GO:0004674;;GO:0048544;;;;;;;;
Vitvi10g02176_t001	XP_019073950.1PREDICTED: uncharacterized protein LOC100263747 isoform X2	1261	3	0	0.95	Vitis vinifera	0.9412	2	GO:0005515;GO:0046872		noIPR;noIPR;noIPR;noIPR;noIPR;noIPR;noIPR;IPR000306;IPR019734;IPR013083;IPR000306;noIPR;noIPR;noIPR;noIPR;noIPR;noIPR;noIPR;noIPR;noIPR;noIPR;noIPR;noIPR;noIPR;noIPR;IPR017455;noIPR;IPR011011;IPR011990	;;;;;;;GO:0046872;GO:0005515;;GO:0046872;;;;;;;;;;;;;;;;;;GO:0005515
Vitvi10g02177_t001	XP_010646894.1 BTB/POZ domain-containing protein At3g22104	535	4	0	0.9864	Vitis vinifera	1	2	GO:0005515;GO:0016567		IPR000210;IPR027356;IPR011333;noIPR;IPR043454;IPR000210;IPR027356;IPR011333	GO:0005515;;;;;GO:0005515;;
Vitvi10g02178_t001	XP_019073949.1PREDICTED: uncharacterized protein LOC100241484	635	2	0	0.9961	Vitis vinifera	0.9984	1	GO:0003743		noIPR;noIPR;noIPR;noIPR;noIPR;noIPR;noIPR;noIPR;noIPR;noIPR;IPR010433;noIPR	;;;;;;;;;;GO:0003743;
Vitvi10g04192_t001	RVW14350.1(E,E)-alpha-farnesene synthase	82	4	7e-43	0.9781	Vitis vinifera	0.9753	1	GO:0010333	EC:4.2.3	IPR036965;IPR001906;noIPR;noIPR;IPR008930	GO:0016829/GO:0010333;GO:0016829/GO:0010333;;;
Vitvi10g04193_t001	RVX16894.1O-fucosyltransferase 36	65	4	4.8e-24	0.9655	Vitis vinifera	0.9655	4	GO:0006004;GO:0016021;GO:0036066;GO:0046922	EC:2.4.1.221	noIPR
Vitvi10g02191_t001	XP_010646946.1 proline-rich receptor-like protein kinase PERK1	184	1	1.7e-126	1	Vitis vinifera	1				noIPR;noIPR;noIPR	;;
Vitvi10g02192_t001	CBI38371.3unnamed protein product, partial	201	1	4.5e-120	0.7529	Vitis vinifera	0.7529	3	GO:0004672;GO:0005524;GO:0006468	EC:2.7.1	noIPR;noIPR;noIPR;IPR000719;IPR011009	;;;GO:0005524/GO:0004672/GO:0006468;
Vitvi10g02193_t001	XP_010646947.1 alpha-farnesene synthase-like	173	1	2.5e-118	1	Vitis vinifera	1	1	GO:0010333	EC:4.2.3	IPR008949;IPR001906;IPR036965;IPR036965;noIPR;noIPR;IPR008930	;GO:0016829/GO:0010333;GO:0016829/GO:0010333;GO:0016829/GO:0010333;;;
Vitvi10g04194_t001	XP_002264134.2 alpha-farnesene synthase	311	6	1.1e-182	0.5468	Vitis vinifera	0.5466	2	GO:0000287;GO:0010333	EC:4.2.3	IPR005630;IPR008949;IPR036965;IPR001906;IPR008949;noIPR;noIPR;IPR008949;IPR008930	GO:0016829/GO:0000287/GO:0010333;;GO:0016829/GO:0010333;GO:0016829/GO:0010333;;;;;
Vitvi10g02195_t001	CBI38373.3unnamed protein product, partial	93	1	2.3e-60	1	Vitis vinifera	1				IPR008949;noIPR;noIPR;IPR008949	;;;
Vitvi10g04195_t001	XP_034698067.1calcium/calmodulin-regulated receptor-like kinase 1 isoform X1	414	3	6.9e-282	0.9573	Vitis riparia	0.9926	3	GO:0004672;GO:0005524;GO:0006468	EC:2.7.1	IPR000719;noIPR;IPR001245;noIPR;noIPR;noIPR;noIPR;noIPR;noIPR;IPR008271;IPR000719;noIPR;IPR011009	GO:0005524/GO:0004672/GO:0006468;;GO:0004672/GO:0006468;;;;;;;GO:0004672/GO:0006468;GO:0005524/GO:0004672/GO:0006468;;
Vitvi10g02185_t001	D7U6G6.1RecName: Full=Anthocyanidin reductase ((2S)-flavan-3-ol-forming); Short=VvANR	338	5	6.1e-242	0.9976	Vitis vinifera	1	5	GO:0009813;GO:0016616;GO:0016854;GO:0033729;GO:0050661	EC:5.1;EC:1.1.1;EC:1.3.1.77	IPR001509;noIPR;noIPR;noIPR;noIPR;IPR036291	GO:0003824;;;;;
Vitvi10g04196_t001	CAN59869.1hypothetical protein VITISV_013442	95	1	2.5e-57	0.9579	Vitis vinifera	0.9579				noIPR;noIPR;noIPR	;;
Vitvi10g02187_t001	XP_034698908.1 anthocyanidin reductase ((2S)-flavan-3-ol-forming)-like	154	2	1.4e-89	0.9056	Vitis vinifera	0.9857	1	GO:0003824		IPR001509;noIPR;noIPR;noIPR;noIPR;noIPR;IPR036291	GO:0003824;;;;;;
Vitvi10g00290_t001	XP_010647488.1PREDICTED: uncharacterized protein LOC100244205	418	4	7.7e-297	0.9958	Vitis vinifera	1				noIPR;noIPR;noIPR;noIPR;IPR013087;noIPR	;;;;;
Vitvi10g04197_t001	---NA---	112
Vitvi10g02382_t002	XP_003635536.2 protein HEAT-STRESS-ASSOCIATED 32	240	3	1e-172	0.9958	Vitis vinifera	0.9958	1	GO:0003824		IPR003830;IPR013785;noIPR;noIPR;IPR036112	;GO:0003824;;;
Vitvi10g02382_t001	XP_003635536.2 protein HEAT-STRESS-ASSOCIATED 32	286	2	2.6e-210	0.9965	Vitis vinifera	0.9965	1	GO:0003824		IPR013785;IPR003830;noIPR;noIPR;IPR036112	GO:0003824;;;;
Vitvi10g02202_t001	CBI33258.3unnamed protein product, partial	181	5	2.2e-120	0.9901	Vitis vinifera	1	1	GO:0016021		IPR009606;noIPR;noIPR	;;
Vitvi10g02201_t001	RVW86401.1putative histone H2A.3	135	20	2.1e-72	0.9975	Vitis vinifera	1	5	GO:0000786;GO:0003677;GO:0005634;GO:0006342;GO:0046982		IPR002119;IPR002119;IPR007125;IPR032454;IPR009072;noIPR;noIPR;IPR032458;IPR002119;IPR009072	GO:0000786/GO:0003677;GO:0000786/GO:0003677;GO:0003677;;GO:0046982;;;;GO:0000786/GO:0003677;GO:0046982
Vitvi10g04198_t001	RVW14358.1putative transcription factor	102	1	3.5e-59	0.9796	Vitis vinifera	0.9796	1	GO:0006355
Vitvi10g02200_t001	XP_003635491.1 STOREKEEPER protein	437	3	1.5e-199	1	Vitis vinifera	1	2	GO:0005634;GO:0006355		noIPR;IPR007592;noIPR;noIPR;noIPR;noIPR;noIPR;noIPR;IPR007592;noIPR	;GO:0006355;;;;;;;GO:0006355;
Vitvi10g04199_t001	XP_028058048.1brefeldin A-inhibited guanine nucleotide-exchange protein 5	214	12	8.5e-13	0.7026	Camellia sinensis var. sinensis	0.902	8	GO:0005085;GO:0005829;GO:0005985;GO:0015031;GO:0016020;GO:0016157;GO:0032012;GO:0050790	EC:2.4.1.13	noIPR;IPR012820	;GO:0016157/GO:0005985
Vitvi10g04200_t001	RVW25333.1Retrovirus-related Pol polyprotein from transposon TNT 1-94	85	1	6.5e-25	0.8286	Vitis vinifera	0.8286	2	GO:0003676;GO:0008270
Vitvi10g04201_t001	XP_010661911.1PREDICTED: uncharacterized protein LOC100241322 isoform X5	95	11	4.2e-08	0.6803	Vitis vinifera	0.6604				noIPR
Vitvi10g02211_t001	RVW14357.1putative F-box protein	376	4	1e-282	0.9947	Vitis vinifera	1	1	GO:0005515		noIPR;IPR001810;noIPR;IPR001810;noIPR;noIPR;IPR001810;IPR036047	;GO:0005515;;GO:0005515;;;GO:0005515;GO:0005515
Vitvi10g02212_t001	XP_002275624.1 oxygen-evolving enhancer protein 3, chloroplastic	231	3	1e-150	1	Vitis vinifera	1	6	GO:0005509;GO:0009507;GO:0009654;GO:0009767;GO:0019898;GO:0045156	EC:1	IPR008797;IPR023222;IPR008797;noIPR;IPR023222	GO:0005509/GO:0019898/GO:0009523/GO:0009654/GO:0015979;;GO:0005509/GO:0019898/GO:0009523/GO:0009654/GO:0015979;;
Vitvi10g02215_t001	XP_002265300.1 kinesin-like protein KIN-14C	802	3	0	0.9954	Vitis vinifera	1	7	GO:0005524;GO:0005871;GO:0005874;GO:0007018;GO:0008017;GO:0051225;GO:1990939	EC:3.6.1	noIPR;noIPR;noIPR;noIPR;noIPR;IPR001752;IPR001752;IPR036961;IPR001752;noIPR;noIPR;noIPR;noIPR;IPR019821;IPR001752;noIPR;IPR027417	;;;;;GO:1990939/GO:0008017/GO:0007018/GO:0005524;GO:1990939/GO:0008017/GO:0007018/GO:0005524;;GO:1990939/GO:0008017/GO:0007018/GO:0005524;;;;;GO:0007018/GO:0005524/GO:0003777;GO:1990939/GO:0008017/GO:0007018/GO:0005524;;
Vitvi10g02216_t001	RVW86398.1Thioredoxin-like protein CXXS1	126	4	1e-83	0.994	Vitis vinifera	1				IPR013766;noIPR;noIPR;noIPR;IPR013766;noIPR;IPR036249	;;;;;;
Vitvi10g02218_t001	XP_002273184.2 transcription factor ILR3 isoform X2	232	4	2.7e-142	0.9772	Vitis vinifera	1	4	GO:0003700;GO:0006355;GO:0046983;GO:0055072		noIPR;IPR011598;IPR036638;IPR011598;noIPR;IPR044818;IPR011598;noIPR;IPR036638	;GO:0046983;GO:0046983;GO:0046983;;GO:0003700/GO:0046983/GO:0055072/GO:0006355;GO:0046983;;GO:0046983
Vitvi10g02218_t002	XP_010647170.1 transcription factor ILR3 isoform X3	225	1	3.5e-130	1	Vitis vinifera	1	4	GO:0003700;GO:0006355;GO:0046983;GO:0055072		noIPR;IPR011598;IPR036638;IPR011598;IPR044818;noIPR;IPR011598;noIPR;IPR036638	;GO:0046983;GO:0046983;GO:0046983;GO:0003700/GO:0046983/GO:0055072/GO:0006355;;GO:0046983;;GO:0046983
Vitvi10g02219_t001	XP_034697942.1sulfite exporter TauE/SafE family protein 5-like isoform X1	458	5	0	0.9978	Vitis vinifera	1	3	GO:0016021;GO:0016567;GO:0031464		IPR002781;noIPR;noIPR	GO:0016021;;
Vitvi10g02220_t001	XP_034698111.1cysteine-rich repeat secretory protein 38-like	279	1	7.1e-200	0.9964	Vitis riparia	0.9964				IPR002902;IPR038408;noIPR;noIPR;IPR002902;IPR002902	;;;;;
Vitvi10g04202_t001	XP_003635324.3 putative receptor-like protein kinase At4g00960	657	3	0	0.9949	Vitis vinifera	1	3	GO:0004672;GO:0005524;GO:0006468	EC:2.7.1	IPR000719;noIPR;noIPR;IPR001245;IPR002902;IPR038408;noIPR;noIPR;noIPR;noIPR;IPR008271;IPR002902;IPR002902;IPR000719;noIPR;IPR011009	GO:0005524/GO:0004672/GO:0006468;;;GO:0004672/GO:0006468;;;;;;;GO:0004672/GO:0006468;;;GO:0005524/GO:0004672/GO:0006468;;
Vitvi10g02222_t001	RVW87138.1Cysteine-rich receptor-like protein kinase 10	626	1	0	0.9211	Vitis vinifera	0.9211	4	GO:0004672;GO:0005524;GO:0006468;GO:0016020	EC:2.7.1	IPR000719;IPR002902;IPR038408;noIPR;noIPR;IPR001245;noIPR;noIPR;noIPR;noIPR;noIPR;noIPR;IPR008271;IPR000719;IPR002902;IPR002902;noIPR;IPR011009	GO:0005524/GO:0004672/GO:0006468;;;;;GO:0004672/GO:0006468;;;;;;;GO:0004672/GO:0006468;GO:0005524/GO:0004672/GO:0006468;;;;
Vitvi10g04203_t001	RVW87104.1Cysteine-rich receptor-like protein kinase 25	175	1	8.2e-118	1	Vitis vinifera	1	4	GO:0004672;GO:0005524;GO:0006468;GO:0016021	EC:2.7.1	noIPR;IPR001245;noIPR;noIPR;noIPR;IPR000719;IPR011009	;GO:0004672/GO:0006468;;;;GO:0005524/GO:0004672/GO:0006468;
Vitvi10g01729_t001	RVW87104.1Cysteine-rich receptor-like protein kinase 25	275	2	1.3e-179	0.9581	Vitis riparia	0.9599	4	GO:0004672;GO:0005524;GO:0006468;GO:0016021	EC:2.7.1	IPR038408;IPR002902;noIPR;noIPR;IPR002902;IPR002902	;;;;;
Vitvi10g01728_t001	XP_034698108.1putative receptor-like protein kinase At4g00960	669	3	0	0.9519	Vitis riparia	0.9552	4	GO:0004672;GO:0005524;GO:0006468;GO:0016021	EC:2.7.1	IPR000719;noIPR;IPR001245;IPR038408;noIPR;IPR002902;noIPR;noIPR;noIPR;IPR008271;IPR000719;IPR002902;IPR002902;noIPR;IPR011009	GO:0005524/GO:0004672/GO:0006468;;GO:0004672/GO:0006468;;;;;;;GO:0004672/GO:0006468;GO:0005524/GO:0004672/GO:0006468;;;;
Vitvi10g02227_t001	RVW86339.1Cysteine-rich receptor-like protein kinase 29	677	4	0	0.9339	Vitis vinifera	0.9688	5	GO:0004674;GO:0005524;GO:0005886;GO:0006468;GO:0016021	EC:2.7.1	IPR000719;noIPR;noIPR;IPR001245;IPR038408;IPR002902;noIPR;noIPR;noIPR;noIPR;noIPR;IPR008271;IPR017441;IPR002902;IPR000719;IPR002902;noIPR;IPR011009	GO:0005524/GO:0004672/GO:0006468;;;GO:0004672/GO:0006468;;;;;;;;GO:0004672/GO:0006468;GO:0005524;;GO:0005524/GO:0004672/GO:0006468;;;
Vitvi10g02229_t001	XP_003635466.2 cysteine-rich receptor-like protein kinase 25	675	3	0	0.9666	Vitis vinifera	1	4	GO:0004672;GO:0005524;GO:0006468;GO:0016021	EC:2.7.1	IPR000719;IPR001245;IPR038408;noIPR;noIPR;IPR002902;noIPR;noIPR;noIPR;noIPR;IPR008271;IPR002902;IPR002902;IPR000719;noIPR;IPR011009	GO:0005524/GO:0004672/GO:0006468;GO:0004672/GO:0006468;;;;;;;;;GO:0004672/GO:0006468;;;GO:0005524/GO:0004672/GO:0006468;;
Vitvi10g04204_t001	RVW86442.1Cysteine-rich receptor-like protein kinase 29	300	1	2.3e-158	0.802	Vitis vinifera	0.802	2	GO:0016301;GO:0016310	EC:2.7	IPR038408;IPR002902;noIPR;noIPR;IPR002902;IPR002902	;;;;;
Vitvi10g02225_t001	XP_010646646.2 cysteine-rich receptor-like protein kinase 10	648	1	0	1	Vitis vinifera	1	3	GO:0004672;GO:0005524;GO:0006468	EC:2.7.1	IPR000719;noIPR;IPR038408;noIPR;IPR002902;IPR001245;noIPR;noIPR;noIPR;IPR008271;IPR000719;IPR002902;IPR002902;noIPR;IPR011009	GO:0005524/GO:0004672/GO:0006468;;;;;GO:0004672/GO:0006468;;;;GO:0004672/GO:0006468;GO:0005524/GO:0004672/GO:0006468;;;;
Vitvi10g04205_t001	CAN72002.1hypothetical protein VITISV_017223	91	1	5.5e-46	0.9884	Vitis vinifera	0.9884	3	GO:0003684;GO:0005634;GO:0006289		noIPR
Vitvi10g04206_t001	CAN72002.1hypothetical protein VITISV_017223	74	1	1.5e-34	1	Vitis vinifera	1	3	GO:0003684;GO:0005634;GO:0006289		noIPR;noIPR;noIPR	;;
Vitvi10g04207_t001	CAN72002.1hypothetical protein VITISV_017223	187	1	1e-102	0.9722	Vitis vinifera	0.9722	3	GO:0003684;GO:0005634;GO:0006289		noIPR;noIPR;noIPR	;;
Vitvi10g02236_t001	CAN72002.1hypothetical protein VITISV_017223	609	1	0	0.7674	Vitis vinifera	0.7674				IPR036985;noIPR;noIPR;noIPR;noIPR;noIPR	;;;;;
Vitvi10g02237_t001	RVX23620.1Glycine-rich domain-containing protein 1	67	4	3.3e-13	0.8974	Vitis vinifera	0.8974				noIPR;IPR009836	;
Vitvi10g04208_t001	XP_034697797.1putative receptor-like protein kinase At4g00960	669	4	0	0.9424	Vitis vinifera	0.9742	4	GO:0004672;GO:0005524;GO:0006468;GO:0016021	EC:2.7.1	IPR000719;IPR002902;noIPR;IPR000719;IPR038408;noIPR;noIPR;noIPR;noIPR;noIPR;IPR008271;IPR002902;IPR000719;IPR002902;noIPR;IPR011009	GO:0005524/GO:0004672/GO:0006468;;;GO:0005524/GO:0004672/GO:0006468;;;;;;;GO:0004672/GO:0006468;;GO:0005524/GO:0004672/GO:0006468;;;
Vitvi10g04209_t001	RVW33572.1Cysteine-rich receptor-like protein kinase 25	497	5	8.7e-303	0.9745	Vitis vinifera	1	4	GO:0004672;GO:0005524;GO:0006468;GO:0016021	EC:2.7.1	IPR000719;noIPR;IPR038408;IPR002902;IPR001245;noIPR;noIPR;noIPR;noIPR;noIPR;noIPR;noIPR;noIPR;noIPR;IPR008271;IPR002902;IPR000719;noIPR;IPR011009	GO:0005524/GO:0004672/GO:0006468;;;;GO:0004672/GO:0006468;;;;;;;;;;GO:0004672/GO:0006468;;GO:0005524/GO:0004672/GO:0006468;;
Vitvi10g04210_t001	XP_010646640.1 putative receptor-like protein kinase At4g00960 isoform X3	394	3	1.8e-208	0.5544	Vitis vinifera	0.5486	1	GO:0016740	EC:2	noIPR;IPR002902;IPR038408;noIPR;noIPR;noIPR;noIPR;noIPR;IPR002902;IPR002902	;;;;;;;;;
Vitvi10g02240_t001	CBI23452.3unnamed protein product, partial	610	1	0	0.9344	Vitis vinifera	0.9344	4	GO:0005525;GO:0006508;GO:0008233;GO:0050661	EC:3.4	IPR001096;IPR006115;IPR027417;IPR001096;noIPR;IPR038408;noIPR;IPR010674;noIPR;IPR001096;IPR002902;IPR027417;IPR036291	GO:0008233/GO:0006508;GO:0050661;;GO:0008233/GO:0006508;;;;GO:0005525;;GO:0008233/GO:0006508;;;
Vitvi10g04211_t001	XP_019073810.1 cysteine-rich receptor-like protein kinase 29 isoform X5	98	6	1e-16	0.8837	Vitis vinifera	0.6986	5	GO:0004674;GO:0005524;GO:0005886;GO:0006468;GO:0016021	EC:2.7.1
Vitvi10g04212_t001	XP_019073810.1 cysteine-rich receptor-like protein kinase 29 isoform X5	279	3	3.8e-191	0.995	Vitis vinifera	0.9851	5	GO:0004674;GO:0005524;GO:0005886;GO:0006468;GO:0016021	EC:2.7.1	IPR038408;IPR002902;noIPR;noIPR;IPR002902;IPR002902	;;;;;
Vitvi10g02245_t001	XP_002269663.1 exocyst complex component SEC8	78	4	3e-26	0.9242	Vitis vinifera	0.9242	4	GO:0000145;GO:0006612;GO:0006893;GO:0090522		noIPR;IPR039682	;GO:0000145/GO:0090522
Vitvi10g02246_t001	RVW33618.1Cysteine-rich receptor-like protein kinase 28	56	2	3.5e-28	0.9727	Vitis vinifera	0.9818	4	GO:0004674;GO:0005524;GO:0006468;GO:0016021	EC:2.7.1	IPR001245;noIPR;noIPR;noIPR;IPR011009	GO:0004672/GO:0006468;;;;
Vitvi10g02247_t001	CBI23447.3unnamed protein product, partial	82	1	4.4e-30	0.725	Vitis vinifera	0.725				IPR038408;noIPR;noIPR;noIPR;noIPR;IPR002902	;;;;;
Vitvi10g02248_t001	XP_010646642.1 cysteine-rich receptor-like protein kinase 28	198	1	5.5e-141	1	Vitis vinifera	1				IPR038408;IPR002902;noIPR;noIPR;IPR002902	;;;;
Vitvi10g04213_t001	RVW87192.1Cysteine-rich receptor-like protein kinase 29	461	3	8.4e-262	0.7344	Vitis vinifera	0.7883	5	GO:0004674;GO:0005524;GO:0005886;GO:0006468;GO:0016021	EC:2.7.1	IPR002902;IPR038408;noIPR;noIPR;noIPR;noIPR;noIPR;noIPR;noIPR;IPR002902;IPR002902;IPR011009	;;;;;;;;;;;
Vitvi10g04214_t001	RVW87193.1Cysteine-rich receptor-like protein kinase 29	550	5	0	0.9278	Vitis vinifera	0.9401	4	GO:0004674;GO:0005524;GO:0006468;GO:0016021	EC:2.7.1	IPR000719;IPR038408;noIPR;IPR002902;IPR001245;noIPR;noIPR;noIPR;noIPR;noIPR;noIPR;IPR017441;IPR008271;IPR000719;IPR002902;noIPR;IPR011009	GO:0005524/GO:0004672/GO:0006468;;;;GO:0004672/GO:0006468;;;;;;;GO:0005524;GO:0004672/GO:0006468;GO:0005524/GO:0004672/GO:0006468;;;
Vitvi10g04215_t001	RVW33592.1Cysteine-rich receptor-like protein kinase 10	120	4	3.3e-74	0.9938	Vitis vinifera	1	5	GO:0004674;GO:0005524;GO:0005886;GO:0006468;GO:0016021	EC:2.7.1	noIPR;noIPR;noIPR	;;
Vitvi10g04216_t001	ADR74213.1(3S)-linalool/(E)-nerolidol /(E,E)-geranyl linalool synthase	545	14	0	0.9902	Vitis vinifera	0.9963	3	GO:0000287;GO:0010333;GO:0016102	EC:4.2.3	IPR008949;IPR005630;IPR001906;IPR036965;IPR034741;noIPR;noIPR;noIPR;IPR044814;IPR008949;IPR008930	;GO:0016829/GO:0000287/GO:0010333;GO:0016829/GO:0010333;GO:0016829/GO:0010333;;;;;GO:0016102/GO:0010333;;
Vitvi10g02129_t001	XP_019073969.1 (3S,6E)-nerolidol synthase 1, chloroplastic-like	425	10	3.8e-298	0.9675	Vitis vinifera	0.9783	2	GO:0000287;GO:0010333	EC:4.2.3	IPR005630;IPR001906;IPR008949;IPR036965;noIPR;noIPR;IPR008930;IPR008949	GO:0016829/GO:0000287/GO:0010333;GO:0016829/GO:0010333;;GO:0016829/GO:0010333;;;;
Vitvi10g04217_t001	XP_003635177.1 (3S,6E)-nerolidol synthase 1 isoform X1	443	10	1.4e-293	0.9856	Vitis vinifera	1	2	GO:0000287;GO:0010333	EC:4.2.3	IPR005630;IPR008949;IPR001906;IPR036965;noIPR;noIPR;IPR008930;IPR008949	GO:0016829/GO:0000287/GO:0010333;;GO:0016829/GO:0010333;GO:0016829/GO:0010333;;;;
Vitvi10g04218_t001	XP_034697313.1G-type lectin S-receptor-like serine/threonine-protein kinase At1g11410	263	2	2.1e-112	0.514	Vitis riparia	0.5152	3	GO:0004672;GO:0005524;GO:0006468	EC:2.7.1	noIPR;noIPR;noIPR;noIPR;noIPR;IPR000719;IPR011009	;;;;;GO:0005524/GO:0004672/GO:0006468;
Vitvi10g04219_t001	RVW58726.1(3S,6E)-nerolidol synthase 1	92	20	1.7e-59	1	Vitis vinifera	1	2	GO:0000287;GO:0010333	EC:4.2.3	IPR008949;IPR005630;noIPR;noIPR;IPR008949	;GO:0016829/GO:0000287/GO:0010333;;;
Vitvi10g04220_t001	XP_034698432.1(3S,6E)-nerolidol synthase 1-like	419	9	4e-261	0.9177	Vitis riparia	0.9221	3	GO:0000287;GO:0010333;GO:0034007	EC:4.2.3.25	IPR001906;IPR008949;IPR036965;IPR005630;noIPR;noIPR;IPR008949;IPR008930	GO:0016829/GO:0010333;;GO:0016829/GO:0010333;GO:0016829/GO:0000287/GO:0010333;;;;
Vitvi10g04221_t001	XP_034704293.1pentatricopeptide repeat-containing protein At3g13160, mitochondrial-like	204	5	4.7e-21	1	Vitis riparia	1	1	GO:0005515		IPR011990;IPR002885;IPR002885;IPR002885;noIPR;noIPR;IPR002885;IPR002885;IPR002885;noIPR	GO:0005515;;;;;;;;;
Vitvi10g04222_t001	RVW86367.1Pentatricopeptide repeat-containing protein	227	4	2e-131	0.9877	Vitis vinifera	0.982	1	GO:0005515		IPR002885;IPR011990;IPR002885;IPR002885;noIPR;noIPR;IPR002885	;GO:0005515;;;;;
Vitvi10g04223_t001	XP_002263717.2 (3S,6E)-nerolidol synthase 1	279	9	4.8e-198	0.9932	Vitis vinifera	1	3	GO:0000287;GO:0010333;GO:0034007	EC:4.2.3.25	IPR036965;IPR001906;IPR008949;noIPR;noIPR;IPR008930	GO:0016829/GO:0010333;GO:0016829/GO:0010333;;;;
Vitvi10g04224_t001	ADR74211.1(3S)-linalool/(E)-nerolidol synthase	51	20	3.6e-25	1	Vitis vinifera	1	3	GO:0000287;GO:0010333;GO:0034007	EC:4.2.3.25	IPR005630;IPR008949;noIPR;noIPR;IPR008949	GO:0016829/GO:0000287/GO:0010333;;;;
Vitvi10g02166_t001	RVW86404.1Pentatricopeptide repeat-containing protein	379	6	3.8e-127	0.9688	Vitis vinifera	0.8443	1	GO:0005515		IPR002885;IPR011990;IPR002885;IPR011990;IPR002885;noIPR;noIPR;IPR002885;IPR002885;IPR002885;IPR002885	;GO:0005515;;GO:0005515;;;;;;;
Vitvi10g02165_t001	XP_002268636.2 pentatricopeptide repeat-containing protein At3g13160, mitochondrial	383	2	2.7e-194	0.9922	Vitis vinifera	1	1	GO:0005515		IPR002885;IPR011990;IPR011990;IPR002885;IPR002885;noIPR;noIPR;IPR002885;IPR002885;IPR002885;IPR002885;IPR002885	;GO:0005515;GO:0005515;;;;;;;;;
Vitvi10g02164_t001	XP_003635181.1 transcription factor DYT1-like	204	5	2.8e-112	0.9922	Vitis vinifera	1	2	GO:0005634;GO:0046983		noIPR;noIPR;IPR011598;IPR011598;IPR036638;noIPR;noIPR;noIPR;noIPR;IPR011598;IPR036638	;;GO:0046983;GO:0046983;GO:0046983;;;;;GO:0046983;GO:0046983
Vitvi10g00321_t001	XP_034697558.1uncharacterized protein LOC117923403	171	3	3.7e-119	0.9981	Vitis riparia	1				IPR007493;IPR036758;IPR007493;noIPR;IPR036758	;;;;
Vitvi10g04225_t001	CAN76854.1hypothetical protein VITISV_006002	359	1	7.7e-226	0.9861	Vitis vinifera	0.9861	1	GO:0070300		noIPR;IPR038943;noIPR;IPR038943	;GO:0070300;;GO:0070300
Vitvi10g00323_t001	XP_003635184.1 transcription factor bHLH112 isoform X1	464	4	0	0.9968	Vitis vinifera	1	5	GO:0000978;GO:0000981;GO:0005634;GO:0006357;GO:0046983		IPR036638;noIPR;noIPR;noIPR;IPR011598;noIPR;IPR036638	GO:0046983;;;;GO:0046983;;GO:0046983
Vitvi10g00323_t002	XP_010646711.1 transcription factor bHLH112 isoform X2	462	4	0	0.9968	Vitis vinifera	1	5	GO:0000978;GO:0000981;GO:0005634;GO:0006357;GO:0046983		IPR036638;noIPR;noIPR;noIPR;IPR011598;noIPR;IPR036638	GO:0046983;;;;GO:0046983;;GO:0046983
Vitvi10g01734_t001	XP_003635185.1 probable NAD(P)H dehydrogenase (quinone) FQR1-like 1	203	4	1.5e-143	0.9901	Vitis vinifera	1	3	GO:0008753;GO:0010181;GO:0050136	EC:1.6.5.10;EC:1.6.5.11;EC:1.6.5.2	IPR005025;IPR010089;IPR029039;noIPR;noIPR;IPR008254;IPR029039	GO:0016491;GO:0003955/GO:0010181;;;;GO:0010181;
Vitvi10g01735_t001	RVW13875.1putative NAD(P)H dehydrogenase (quinone) FQR1-like 1	241	1	3e-171	0.9959	Vitis vinifera	0.9959	3	GO:0008753;GO:0010181;GO:0050136	EC:1.6.5.10;EC:1.6.5.11;EC:1.6.5.2	IPR010089;IPR005025;IPR029039;noIPR;noIPR;IPR008254;IPR029039	GO:0003955/GO:0010181;GO:0016491;;;;GO:0010181;
Vitvi10g04226_t001	XP_003635287.2 U-box domain-containing protein 8	444	1	0	1	Vitis vinifera	1	5	GO:0004842;GO:0005515;GO:0005634;GO:0005737;GO:0016567	EC:2	IPR003613;IPR000225;IPR011989;IPR013083;IPR003613;noIPR;noIPR;IPR000225;IPR003613;noIPR;IPR016024;noIPR	GO:0016567/GO:0004842;GO:0005515;;;GO:0016567/GO:0004842;;;GO:0005515;GO:0016567/GO:0004842;;;
Vitvi10g04227_t001	CBI38299.3unnamed protein product, partial	981	1	0	0.7003	Vitis vinifera	0.7003	2	GO:0004674;GO:0048544	EC:2.7.1	IPR003609;noIPR;IPR021820;IPR000858;noIPR;IPR001480;IPR003609;noIPR;noIPR;noIPR;noIPR;noIPR;noIPR;noIPR;noIPR;IPR000152;IPR000152;IPR000742;IPR000742;IPR003609;IPR003609;noIPR;noIPR;noIPR;noIPR;IPR036426;IPR011009	;;GO:0004674;GO:0048544;;;;;;;;;;;;;;;;;;;;;;;
Vitvi10g04228_t001	KAG5516645.1hypothetical protein RHGRI_037395	121	1	1.8e-23	0.5856	Rhododendron griersonianum	0.5856				noIPR;noIPR	;
Vitvi10g04229_t001	XP_019073933.1 G-type lectin S-receptor-like serine/threonine-protein kinase At1g11300	104	4	1.1e-64	0.9853	Vitis vinifera	1	1	GO:0004674	EC:2.7.1	IPR021820;noIPR;noIPR;noIPR;IPR011009	GO:0004674;;;;
Vitvi10g04230_t001	RVW76133.1G-type lectin S-receptor-like serine/threonine-protein kinase	771	3	0	0.6488	Vitis vinifera	0.6277	2	GO:0004674;GO:0048544	EC:2.7.1	IPR001480;IPR003609;IPR000858;IPR021820;IPR003609;IPR001480;IPR036426;noIPR;noIPR;noIPR;noIPR;IPR001480;IPR003609;IPR001480;noIPR;IPR001480;IPR001480;IPR036426;IPR036426	;;GO:0048544;GO:0004674;;;;;;;;;;;;;;;
Vitvi10g04231_t001	RVW13848.1G-type lectin S-receptor-like serine/threonine-protein kinase	303	8	6.8e-98	0.6659	Vitis vinifera	0.6742	6	GO:0003676;GO:0004674;GO:0005524;GO:0006468;GO:0008270;GO:0030246	EC:2.7.1	noIPR;noIPR;noIPR;noIPR	;;;
Vitvi10g04232_t001	RVW13845.1G-type lectin S-receptor-like serine/threonine-protein kinase	1373	1	0	0.7049	Vitis vinifera	0.7049	4	GO:0004674;GO:0005524;GO:0006468;GO:0048544	EC:2.7.1	IPR000719;IPR001480;IPR003609;IPR001245;IPR003609;IPR001480;IPR000858;noIPR;IPR021820;noIPR;IPR036426;noIPR;noIPR;noIPR;noIPR;noIPR;IPR008271;IPR017441;IPR001480;IPR003609;IPR000719;IPR003609;noIPR;noIPR;IPR001480;noIPR;IPR036426;IPR011009;IPR036426;IPR036426	GO:0005524/GO:0004672/GO:0006468;;;GO:0004672/GO:0006468;;;GO:0048544;;GO:0004674;;;;;;;;GO:0004672/GO:0006468;GO:0005524;;;GO:0005524/GO:0004672/GO:0006468;;;;;;;;;
Vitvi10g04233_t001	RVW76142.1hypothetical protein CK203_044246	93	1	3.3e-57	0.9109	Vitis vinifera	0.9109	1	GO:0016021		noIPR;noIPR	;
Vitvi10g04234_t001	CAN63988.1hypothetical protein VITISV_016156	105	1	1.1e-19	0.6022	Vitis vinifera	0.6022	1	GO:0016740	EC:2
Vitvi10g04235_t001	RVW76143.1G-type lectin S-receptor-like serine/threonine-protein kinase	199	1	1.3e-129	0.8774	Vitis vinifera	0.8774	4	GO:0016301;GO:0016310;GO:0030246;GO:0048544	EC:2.7	IPR000858;noIPR;noIPR	GO:0048544;;
Vitvi10g04236_t001	XP_034698090.1G-type lectin S-receptor-like serine/threonine-protein kinase At1g11300 isoform X2	182	4	9.7e-92	0.8242	Vitis riparia	0.8242	5	GO:0004674;GO:0005524;GO:0006468;GO:0016020;GO:0048544	EC:2.7.1	noIPR;IPR001245;IPR021820;noIPR;noIPR;noIPR;IPR011009	;GO:0004672/GO:0006468;GO:0004674;;;;
Vitvi10g04237_t001	XP_034698090.1G-type lectin S-receptor-like serine/threonine-protein kinase At1g11300 isoform X2	78	5	8.9e-43	0.9385	Vitis riparia	0.9359	6	GO:0004674;GO:0005524;GO:0006468;GO:0016021;GO:0030246;GO:0048544	EC:2.7.1	noIPR;noIPR	;
Vitvi10g04238_t001	CBI18762.3unnamed protein product, partial	131	1	4.8e-66	1	Vitis vinifera	1				IPR001480;IPR036426;IPR001480;noIPR;noIPR;IPR001480;IPR001480;IPR036426	;;;;;;;
Vitvi10g02322_t001	RVW76133.1G-type lectin S-receptor-like serine/threonine-protein kinase	2582	2	0	0.5833	Vitis riparia	0.5484	4	GO:0004674;GO:0005524;GO:0006468;GO:0048544	EC:2.7.1	IPR001480;IPR003609;IPR000742;IPR000858;noIPR;IPR003609;IPR001245;IPR021820;IPR036426;IPR001480;noIPR;noIPR;noIPR;noIPR;noIPR;noIPR;noIPR;noIPR;noIPR;noIPR;IPR003609;IPR003609;IPR000742;IPR003609;IPR000742;IPR003609;IPR001480;IPR001480;IPR001480;IPR001480;IPR000719;noIPR;noIPR;IPR001480;IPR001480;IPR001480;IPR001480;noIPR;noIPR;noIPR;IPR036426;IPR011009;IPR036426;IPR011009;IPR036426;IPR011009;IPR…	;;;GO:0048544;;;GO:0004672/GO:0006468;GO:0004674;;;;;;;;;;;;;;;;;;;;;;;GO:0005524/GO:0004672/GO:0006468;;;;;;;;;;;;;;;;
Vitvi10g04239_t001	XP_019074174.1 G-type lectin S-receptor-like serine/threonine-protein kinase SD1-13	103	4	1.3e-64	0.9603	Vitis vinifera	0.9694	6	GO:0004672;GO:0005524;GO:0006468;GO:0016021;GO:0030246;GO:0048544	EC:2.7.1	IPR000858;noIPR;noIPR	GO:0048544;;
Vitvi10g04240_t001	RVW13825.1G-type lectin S-receptor-like serine/threonine-protein kinase	541	2	1.8e-263	0.8275	Vitis riparia	0.897	5	GO:0005488;GO:0016020;GO:0016301;GO:0016310;GO:0048544	EC:2.7	IPR003609;IPR001480;IPR000858;IPR001480;IPR003609;IPR036426;noIPR;noIPR;noIPR;noIPR;IPR022272;IPR003609;IPR001480;IPR001480;noIPR;IPR001480;IPR001480;IPR036426;IPR036426	;;GO:0048544;;;;;;;;;;;;;;;;
Vitvi10g04241_t001	RVW13829.1G-type lectin S-receptor-like serine/threonine-protein kinase	288	1	2.6e-211	1	Vitis vinifera	1	4	GO:0016301;GO:0016310;GO:0030246;GO:0048544	EC:2.7	IPR001480;IPR001480;IPR036426;IPR000858;noIPR;noIPR;noIPR;noIPR;IPR001480;noIPR;IPR001480;IPR036426	;;;GO:0048544;;;;;;;;
Vitvi10g04242_t001	XP_002263028.1 calcium-binding protein PBP1	113	1	3.3e-76	1	Vitis vinifera/Vitis riparia	1	1	GO:0005509		noIPR;IPR002048;IPR044205;noIPR;IPR018247;IPR002048;IPR011992	;GO:0005509;GO:0005509;;;GO:0005509;
Vitvi10g02328_t001	RVW13823.1B-box zinc finger protein 32	212	1	7.3e-121	1	Vitis vinifera	1	1	GO:0008270		IPR000315;IPR000315;noIPR;noIPR;noIPR;noIPR;noIPR;IPR000315;noIPR	GO:0008270;GO:0008270;;;;;;GO:0008270;
Vitvi10g02328_t002	XP_002262995.1 zinc finger protein CONSTANS-LIKE 9-like	185	4	3.1e-102	0.9668	Vitis vinifera	1	1	GO:0008270		IPR000315;IPR000315;noIPR;noIPR;noIPR;noIPR;noIPR;IPR000315;noIPR	GO:0008270;GO:0008270;;;;;;GO:0008270;
Vitvi10g00352_t001	XP_010646368.1 universal stress protein PHOS32	234	2	9.3e-164	0.9851	Vitis vinifera	0.9956				IPR006015;IPR006016;IPR014729;noIPR;IPR044162;noIPR;noIPR	;;;;;;
Vitvi10g00350_t001	XP_002272953.1 nitric oxide synthase-interacting protein	304	3	8.2e-223	0.9989	Vitis vinifera	1	3	GO:0005634;GO:0016567;GO:0061630	EC:2	noIPR;IPR016818;IPR013083;noIPR;IPR013083;IPR031790;IPR016818;IPR017907;IPR001841;noIPR;noIPR;noIPR	;GO:0061630;;;;;GO:0061630;;;;;
Vitvi10g04243_t001	XP_003635067.2PREDICTED: uncharacterized protein LOC100246768	360	1	1.1e-243	1	Vitis vinifera	1				IPR006461;IPR006461;noIPR;noIPR;noIPR;IPR006461	;;;;;
Vitvi10g04243_t002	XP_003635067.2PREDICTED: uncharacterized protein LOC100246768	301	1	9.8e-132	0.9091	Vitis vinifera	0.9091				IPR006461;noIPR;IPR006461;noIPR	;;;
Vitvi10g04243_t003	XP_003635067.2PREDICTED: uncharacterized protein LOC100246768	301	1	9.8e-132	0.9091	Vitis vinifera	0.9091				IPR006461;noIPR;IPR006461;noIPR	;;;
Vitvi10g04243_t004	XP_003635067.2PREDICTED: uncharacterized protein LOC100246768	283	1	1.1e-111	1	Vitis vinifera	1				noIPR
Vitvi10g00345_t001	XP_019073657.1 myb-related protein Myb4 isoform X1	268	2	7.9e-185	1	Vitis vinifera	1	1	GO:0005634		IPR001005;noIPR;IPR017930;noIPR;noIPR;noIPR;noIPR;noIPR;IPR017930;IPR001005;IPR001005;IPR017930;IPR001005;IPR001005;IPR009057	;;;;;;;;;;;;;;
Vitvi10g00344_t001	RVW28294.1putative cyclin-D6-1	332	5	1e-232	0.9826	Vitis vinifera	1	2	GO:0007049;GO:0051301		IPR004367;IPR013763;IPR004367;IPR006671;noIPR;noIPR;noIPR;noIPR;noIPR;IPR039361;IPR013763;IPR036915;IPR036915	;;;;;;;;;;;;
Vitvi10g00343_t001	XP_019073661.1PREDICTED: uncharacterized protein LOC100261837	428	5	9.3e-294	0.9704	Vitis vinifera	1	3	GO:0004674;GO:0005515;GO:0046777	EC:2.7.1	IPR000270;IPR000270;noIPR;noIPR;noIPR;noIPR;noIPR;noIPR;noIPR	GO:0005515;GO:0005515;;;;;;;
Vitvi10g00342_t001	XP_002270728.2 equilibrative nucleotide transporter 3	417	4	9.8e-304	0.9958	Vitis vinifera	1	3	GO:0005337;GO:0016021;GO:1901642	EC:7	IPR002259;IPR002259;noIPR;IPR002259	GO:0016021/GO:1901642/GO:0005337;GO:0016021/GO:1901642/GO:0005337;;GO:0016021/GO:1901642/GO:0005337
Vitvi10g04244_t001	CAN67514.1hypothetical protein VITISV_012081	205	1	2.7e-135	0.9756	Vitis vinifera	0.9756	6	GO:0003676;GO:0004523;GO:0005337;GO:0016021;GO:0090502;GO:1901642	EC:3.1.30;EC:7;EC:3.1.26.4	IPR002156;IPR036397;noIPR;noIPR;IPR002156;IPR044730;IPR012337	GO:0004523/GO:0003676;GO:0003676;;;GO:0004523/GO:0003676;;
Vitvi10g00341_t001	XP_003635072.1 equilibrative nucleotide transporter 3-like	414	3	5.2e-302	0.9952	Vitis vinifera	1	3	GO:0005337;GO:0016021;GO:1901642	EC:7	IPR002259;IPR002259;IPR002259;noIPR;IPR036259	GO:0016021/GO:1901642/GO:0005337;GO:0016021/GO:1901642/GO:0005337;GO:0016021/GO:1901642/GO:0005337;;
Vitvi10g00339_t001	XP_034698620.1lysine-specific demethylase JMJ25 isoform X2	1021	3	0	0.9882	Vitis riparia	0.9882	2	GO:0032454;GO:0033169	EC:1.14.11.65;EC:1.14.11.66	IPR003347;IPR014977;IPR003347;IPR018866;noIPR;noIPR;IPR045109;noIPR;IPR014977;IPR001841;IPR003347;noIPR	;;;;;;GO:0032454/GO:0033169;;;;;
Vitvi10g00336_t001	XP_010646357.1 probable serine/threonine-protein kinase abkC	630	2	0	0.9984	Vitis vinifera	1				IPR004147;noIPR;noIPR;IPR044095;IPR011009	;;;;
Vitvi10g00334_t001	XP_019073659.1 equilibrative nucleotide transporter 3 isoform X2	410	2	1.4e-287	1	Vitis vinifera	1	4	GO:0005337;GO:0005886;GO:0016021;GO:1901642	EC:7	IPR002259;IPR002259;noIPR;IPR002259;IPR036259	GO:0016021/GO:1901642/GO:0005337;GO:0016021/GO:1901642/GO:0005337;;GO:0016021/GO:1901642/GO:0005337;
Vitvi10g04245_t001	XP_002275178.2 vesicle-associated protein 4-2 isoform X2	189	4	4.2e-119	0.9577	Vitis vinifera	0.9833	5	GO:0005789;GO:0005886;GO:0009739;GO:0061817;GO:0090158		IPR000535;IPR013783;noIPR;IPR016763;IPR000535;IPR008962	;;;GO:0005789;;
Vitvi10g01738_t001	CBI40858.3unnamed protein product, partial	71	1	4.8e-43	1	Vitis vinifera	1
Vitvi10g01737_t001	XP_002275178.2hypothetical protein VITISV_011095	88	1	2.3e-41	1	Vitis vinifera	1				IPR022251;IPR022251;noIPR	;;
Vitvi10g04246_t001	CAN74546.1hypothetical protein VITISV_011096	95	2	2.7e-60	0.9842	Vitis vinifera	1				IPR018392;IPR018392;IPR036779;noIPR;noIPR;IPR018392;IPR018392;IPR036779	;;;;;;;
Vitvi10g04247_t001	CAN74547.1hypothetical protein VITISV_011097	95	2	6.5e-61	0.9842	Vitis vinifera	1				IPR018392;IPR036779;IPR018392;noIPR;noIPR;IPR018392;IPR018392;IPR036779	;;;;;;;
Vitvi10g04248_t001	CAN74548.1hypothetical protein VITISV_011098	89	1	7.9e-57	1	Vitis vinifera	1				IPR018392;IPR018392;IPR036779;noIPR;noIPR;IPR018392;IPR018392;IPR036779	;;;;;;;
Vitvi10g04249_t001	CAN74549.1hypothetical protein VITISV_011099	92	1	7.2e-59	1	Vitis vinifera	1				IPR018392;IPR018392;IPR036779;noIPR;noIPR;IPR018392;IPR018392;IPR036779	;;;;;;;
Vitvi10g04250_t001	CAN74550.1hypothetical protein VITISV_011100	93	1	2.5e-21	0.6344	Vitis vinifera	0.6344				noIPR
Vitvi10g04251_t001	CAN82208.1hypothetical protein VITISV_000178	89	1	6.5e-56	1	Vitis vinifera	1				IPR018392;IPR018392;IPR036779;noIPR;noIPR;IPR018392;IPR018392;IPR036779	;;;;;;;
Vitvi10g04252_t001	CAN82204.1hypothetical protein VITISV_000174	91	2	1.9e-49	0.8956	Vitis vinifera	0.9121				IPR018392;IPR018392;IPR036779;noIPR;noIPR;IPR018392;IPR018392;IPR036779	;;;;;;;
Vitvi10g04253_t001	CAN74548.1hypothetical protein VITISV_011098	65	3	1.7e-29	0.6926	Vitis vinifera	0.7079				IPR036779;noIPR;noIPR	;;
Vitvi10g04254_t001	CAN82205.1hypothetical protein VITISV_000175	89	1	1.1e-56	1	Vitis vinifera	1				IPR018392;IPR018392;IPR036779;noIPR;noIPR;IPR018392;IPR018392;IPR036779	;;;;;;;
Vitvi10g04255_t001	CAN82204.1hypothetical protein VITISV_000174	91	1	2.2e-57	1	Vitis vinifera	1				IPR018392;IPR018392;IPR036779;noIPR;noIPR;IPR018392;IPR018392;IPR036779	;;;;;;;
Vitvi10g04256_t001	CAN74548.1hypothetical protein VITISV_011098	133	2	1.1e-45	0.8895	Vitis vinifera	0.8889				IPR018392;IPR018392;IPR036779;noIPR;noIPR;IPR018392;IPR018392;IPR036779	;;;;;;;
Vitvi10g00358_t001	ADP37125.1hexose transporter	519	6	0	0.9955	Vitis vinifera	0.9981	3	GO:0015145;GO:0015749;GO:0016021	EC:7	IPR003663;IPR036259;IPR003663;IPR005828;noIPR;noIPR;IPR005829;IPR005829;IPR020846;IPR044778;IPR036259	GO:0055085/GO:0022857/GO:0016020;;GO:0055085/GO:0022857/GO:0016020;GO:0016021/GO:0055085/GO:0022857;;;GO:0016021/GO:0022857/GO:0055085;GO:0016021/GO:0022857/GO:0055085;GO:0022857;GO:0015749/GO:0015145;
Vitvi10g00359_t001	RVW46341.1Vacuolar protein 8	579	3	0	0.9131	Vitis vinifera	0.9378	1	GO:0005515		IPR000225;IPR011989;IPR000225;noIPR;noIPR;noIPR;noIPR;IPR000225;IPR000225;IPR000225;IPR016024	GO:0005515;;GO:0005515;;;;;GO:0005515;GO:0005515;GO:0005515;
Vitvi10g01740_t001	XP_002271412.2 protein TRANSPORT INHIBITOR RESPONSE 1	583	3	0	0.9724	Vitis vinifera	1	7	GO:0000822;GO:0005515;GO:0009734;GO:0016021;GO:0016567;GO:0019005;GO:0031146		IPR006553;IPR032675;IPR001611;IPR041101;IPR041567;noIPR;noIPR;noIPR;noIPR;noIPR	;;GO:0005515;;;;;;;
Vitvi10g04257_t001	XP_034698206.1external alternative NAD(P)H-ubiquinone oxidoreductase B2, mitochondrial-like isoform X3	550	6	0	0.9658	Vitis riparia	0.9925	5	GO:0005509;GO:0005743;GO:0005777;GO:0006116;GO:0050136	EC:1.6.5.11;EC:1.6.5.2	noIPR;IPR002048;IPR023753;noIPR;noIPR;IPR045024;IPR018247;IPR002048;IPR036188;IPR011992;IPR036188	;GO:0005509;GO:0016491;;;GO:0003954/GO:0006116;;GO:0005509;;;
Vitvi10g04258_t001	RVW46298.1External alternative NAD(P)H-ubiquinone oxidoreductase B2, mitochondrial	636	2	0	0.8866	Vitis vinifera	0.9069	5	GO:0005509;GO:0005743;GO:0005777;GO:0006116;GO:0050136	EC:1.6.5.11;EC:1.6.5.2	noIPR;IPR002048;noIPR;IPR023753;noIPR;IPR045024;IPR018247;IPR002048;IPR036188;IPR011992;IPR036188	;GO:0005509;;GO:0016491;;GO:0003954/GO:0006116;;GO:0005509;;;
Vitvi10g01746_t001	XP_002271376.2PREDICTED: uncharacterized protein LOC100241473	251	3	6.3e-180	0.992	Vitis vinifera	1	1	GO:0016021		noIPR
Vitvi10g00363_t001	XP_003635003.2 heterogeneous nuclear ribonucleoprotein U-like protein 1 isoform X1	703	4	0	0.9847	Vitis vinifera	1	2	GO:0005515;GO:0016021		IPR003877;IPR043136;IPR027417;IPR003877;noIPR;noIPR;noIPR;noIPR;noIPR;noIPR;noIPR;IPR035778;IPR013320;IPR027417	GO:0005515;;;GO:0005515;;;;;;;;;;
Vitvi10g01742_t001	XP_010646142.1 protein arv1 homolog	87	1	4.6e-46	0.9651	Vitis vinifera	0.9651	1	GO:0032366		IPR007290;noIPR;IPR007290	GO:0032366;;GO:0032366
Vitvi10g01748_t001	XP_003634996.1 F-box protein At1g61340-like	172	4	3.8e-117	0.9956	Vitis vinifera	1				noIPR;noIPR;noIPR	;;
Vitvi10g00364_t001	XP_010646146.1 putative FBD-associated F-box protein At1g61330	476	4	0	0.9893	Vitis vinifera	1	1	GO:0005515		IPR001810;IPR032675;noIPR;noIPR;IPR001810;IPR036047;noIPR	GO:0005515;;;;GO:0005515;GO:0005515;
Vitvi10g00365_t001	XP_002277046.4 telomerase Cajal body protein 1 isoform X2	407	2	1.1E-313	0.9975	Vitis vinifera	1	1	GO:0005515		IPR001680;IPR015943;IPR001680;noIPR;IPR036322	GO:0005515;GO:0005515;GO:0005515;;GO:0005515
Vitvi10g00366_t001	XP_003634998.1 bifunctional riboflavin kinase/FMN phosphatase isoform X1	388	5	4.9e-287	0.9847	Vitis vinifera	0.9974	6	GO:0005524;GO:0008531;GO:0009231;GO:0009398;GO:0016310;GO:0016787	EC:2.7.1.26;EC:3	IPR006439;IPR015865;IPR023198;IPR015865;IPR023214;IPR023465;IPR006439;IPR041492;noIPR;noIPR;IPR023468;noIPR;IPR023465;IPR036412	;GO:0008531/GO:0009231;;GO:0008531/GO:0009231;;GO:0008531/GO:0009231;;;;;;;GO:0008531/GO:0009231;
Vitvi10g00366_t002	XP_003634998.1 bifunctional riboflavin kinase/FMN phosphatase isoform X1	388	5	4.9e-287	0.9847	Vitis vinifera	0.9974	6	GO:0005524;GO:0008531;GO:0009231;GO:0009398;GO:0016310;GO:0016787	EC:2.7.1.26;EC:3	IPR006439;IPR015865;IPR023198;IPR015865;IPR023214;IPR023465;IPR006439;IPR041492;noIPR;noIPR;IPR023468;noIPR;IPR023465;IPR036412	;GO:0008531/GO:0009231;;GO:0008531/GO:0009231;;GO:0008531/GO:0009231;;;;;;;GO:0008531/GO:0009231;
Vitvi10g01749_t001	XP_010646154.1 F-box protein At5g03100	536	2	0	1	Vitis vinifera	1	1	GO:0005515		IPR006566;IPR032675;IPR001810;noIPR;noIPR;noIPR;noIPR;IPR036047;noIPR	;;GO:0005515;;;;;GO:0005515;
Vitvi10g01751_t001	XP_010646159.1 putative F-box protein At1g49610 isoform X3	512	5	0	0.9945	Vitis vinifera	1	1	GO:0005515		IPR006566;IPR006566;IPR032675;noIPR;IPR044997;IPR036047;noIPR	;;;;;GO:0005515;
Vitvi10g01751_t002	XP_010646159.1 putative F-box protein At1g49610 isoform X3	446	3	6.3E-314	0.9992	Vitis vinifera	1	1	GO:0005515		IPR032675;IPR044997;noIPR;IPR036047;noIPR	;;;GO:0005515;
Vitvi10g00370_t001	XP_010646169.1 F-box/LRR-repeat protein 25-like	404	1	9.7e-285	0.9827	Vitis vinifera	0.9827	1	GO:0005515		IPR001810;IPR032675;IPR001810;noIPR;noIPR;noIPR;noIPR;IPR001810;noIPR;IPR036047	GO:0005515;;GO:0005515;;;;;GO:0005515;;GO:0005515
Vitvi10g00372_t001	XP_003634999.1chlorophyll a-b binding protein 13, chloroplastic	269	3	2.3e-200	1	Vitis vinifera	1	9	GO:0009416;GO:0009522;GO:0009523;GO:0009535;GO:0009768;GO:0009941;GO:0010287;GO:0016168;GO:0018298		IPR022796;IPR023329;noIPR;IPR001344;noIPR	;;;GO:0009765/GO:0016020;
Vitvi10g00379_t001	XP_010646155.1 anaphase-promoting complex subunit 4 isoform X2	673	3	0	0.9956	Vitis vinifera	0.9985	6	GO:0005680;GO:0031145;GO:0034399;GO:0045842;GO:0051301;GO:0070979		IPR024790;IPR024789	;GO:0031145/GO:0030071/GO:0005680
Vitvi10g00380_t001	XP_010646160.1 calmodulin-binding protein 60 C isoform X2	631	4	0	0.9992	Vitis vinifera	1	1	GO:0005516		IPR012416;noIPR;noIPR;IPR012416;noIPR	GO:0005516;;;GO:0005516;
Vitvi10g00381_t001	XP_002273964.1 protein LOL2	141	2	8.7e-74	0.9929	Vitis vinifera	1	1	GO:0005634		IPR005735;IPR005735;noIPR;noIPR;IPR040319	;;;;
Vitvi10g00382_t001	XP_003635000.1 ribosomal RNA-processing protein 17 isoform X1	202	2	3.1e-133	0.9827	Vitis vinifera	1	2	GO:0003723;GO:0005730		noIPR;IPR019186;noIPR;noIPR;noIPR;noIPR;noIPR;noIPR;IPR019186	;;;;;;;;
Vitvi10g00383_t001	XP_002270943.2 sphingosine kinase 1 isoform X1	489	3	0	0.9966	Vitis vinifera	1	7	GO:0001727;GO:0003951;GO:0005737;GO:0016020;GO:0043231;GO:0046512;GO:0046834	EC:2.7.1.23	IPR001206;IPR001206;IPR017438;noIPR;noIPR;noIPR;IPR001206;IPR016064	GO:0016301;GO:0016301;GO:0003951;;;;GO:0016301;
Vitvi10g04259_t001	XP_034697833.1B3 domain-containing protein Os07g0563300 isoform X1	914	2	0	0.976	Vitis riparia	0.9934	2	GO:0003677;GO:0008270		noIPR;IPR003340;IPR011124;IPR015300;noIPR;IPR003340;noIPR;noIPR;noIPR;noIPR;noIPR;noIPR;noIPR;noIPR;noIPR;noIPR;noIPR;IPR011124;IPR003340;IPR003340;IPR015300	;GO:0003677;GO:0008270;;;GO:0003677;;;;;;;;;;;;GO:0008270;GO:0003677;GO:0003677;
Vitvi10g04259_t002	XP_034697833.1B3 domain-containing protein Os07g0563300 isoform X1	914	2	0	0.9765	Vitis riparia	0.9945	2	GO:0003677;GO:0008270		noIPR;IPR003340;IPR011124;IPR015300;noIPR;IPR003340;noIPR;noIPR;noIPR;noIPR;noIPR;noIPR;noIPR;noIPR;noIPR;noIPR;noIPR;IPR011124;IPR003340;IPR003340;IPR015300	;GO:0003677;GO:0008270;;;GO:0003677;;;;;;;;;;;;GO:0008270;GO:0003677;GO:0003677;
Vitvi10g04259_t003	XP_034697833.1B3 domain-containing protein Os07g0563300 isoform X1	914	2	0	0.9765	Vitis riparia	0.9945	2	GO:0003677;GO:0008270		noIPR;IPR003340;IPR011124;IPR015300;noIPR;IPR003340;noIPR;noIPR;noIPR;noIPR;noIPR;noIPR;noIPR;noIPR;noIPR;noIPR;noIPR;IPR011124;IPR003340;IPR003340;IPR015300	;GO:0003677;GO:0008270;;;GO:0003677;;;;;;;;;;;;GO:0008270;GO:0003677;GO:0003677;
Vitvi10g00385_t001	XP_010646969.1 syntaxin-124	304	4	3.8e-203	0.9959	Vitis vinifera	1	5	GO:0005484;GO:0006886;GO:0016021;GO:0016192;GO:0061025		noIPR;IPR000727;IPR006011;IPR006011;noIPR;IPR000727;noIPR;noIPR;noIPR;noIPR;IPR006012;IPR000727;noIPR;IPR006011;IPR010989	;;GO:0016020;GO:0016020;;;;;;;GO:0005484/GO:0016020/GO:0006886;;;GO:0016020;GO:0016192/GO:0016020
Vitvi10g00386_t001	XP_034698383.1 vacuolar protein sorting-associated protein 28 homolog 2	209	8	1.3e-140	0.985	Vitis vinifera/Vitis riparia	1	3	GO:0000813;GO:0043328;GO:0044877		IPR038358;IPR007143;IPR007143;IPR037206;noIPR;IPR007143;IPR017899;IPR017898;IPR037202;IPR037206	;GO:0032509/GO:0000813;GO:0032509/GO:0000813;;;GO:0032509/GO:0000813;;;;
Vitvi10g00386_t002	XP_034698383.1 vacuolar protein sorting-associated protein 28 homolog 2	209	8	1.3e-140	0.985	Vitis vinifera/Vitis riparia	1	3	GO:0000813;GO:0043328;GO:0044877		IPR038358;IPR007143;IPR007143;IPR037206;noIPR;IPR007143;IPR017899;IPR017898;IPR037202;IPR037206	;GO:0032509/GO:0000813;GO:0032509/GO:0000813;;;GO:0032509/GO:0000813;;;;
Vitvi10g00386_t003	XP_034698383.1 vacuolar protein sorting-associated protein 28 homolog 2	209	8	1.3e-140	0.985	Vitis vinifera/Vitis riparia	1	3	GO:0000813;GO:0043328;GO:0044877		IPR038358;IPR007143;IPR007143;IPR037206;noIPR;IPR007143;IPR017899;IPR017898;IPR037202;IPR037206	;GO:0032509/GO:0000813;GO:0032509/GO:0000813;;;GO:0032509/GO:0000813;;;;
Vitvi10g00386_t004	XP_034698383.1 vacuolar protein sorting-associated protein 28 homolog 2	209	8	1.3e-140	0.985	Vitis vinifera/Vitis riparia	1	3	GO:0000813;GO:0043328;GO:0044877		IPR038358;IPR007143;IPR007143;IPR037206;noIPR;IPR007143;IPR017899;IPR017898;IPR037202;IPR037206	;GO:0032509/GO:0000813;GO:0032509/GO:0000813;;;GO:0032509/GO:0000813;;;;
Vitvi10g00387_t001	XP_019073989.1 pre-mRNA-splicing factor SYF1	880	3	0	0.9235	Vitis vinifera	0.9262	2	GO:0000398;GO:0005515		IPR003107;IPR011990;IPR011990;IPR011990;noIPR;noIPR;noIPR;IPR045075;noIPR;IPR045075;noIPR;IPR011990;IPR011990;IPR011990;IPR011990	GO:0006396;GO:0005515;GO:0005515;GO:0005515;;;;GO:0000398;;GO:0000398;;GO:0005515;GO:0005515;GO:0005515;GO:0005515
Vitvi10g04260_t001	CBI23475.3unnamed protein product, partial	49	1	1.2e-29	1	Vitis vinifera	1
Vitvi10g00390_t001	XP_002273372.2PREDICTED: uncharacterized protein LOC100244739 isoform X1	330	6	7e-228	0.9884	Vitis vinifera	0.997	1	GO:0016021		noIPR;IPR025520;IPR008480;noIPR;noIPR;noIPR;noIPR	;;;;;;
Vitvi10g00390_t002	XP_010646968.1PREDICTED: uncharacterized protein LOC100244739 isoform X2	328	6	1e-226	0.9884	Vitis vinifera	0.997	1	GO:0016021		noIPR;IPR025520;IPR008480;noIPR;noIPR;noIPR;noIPR	;;;;;;
Vitvi10g04261_t001	CAN65070.1hypothetical protein VITISV_003953	77	1	1.4e-44	0.974	Vitis vinifera	0.974	1	GO:0016021		noIPR;noIPR	;
Vitvi10g00391_t001	XP_010646967.1 probable ADP-ribosylation factor GTPase-activating protein AGD5	507	2	0	0.9803	Vitis vinifera	1	2	GO:0005096;GO:0050790		IPR001164;IPR001164;IPR038508;IPR001164;noIPR;noIPR;noIPR;noIPR;noIPR;IPR044520;noIPR;IPR001164;noIPR;IPR037278	GO:0005096;GO:0005096;;GO:0005096;;;;;;GO:0005096;;GO:0005096;;
Vitvi10g00394_t001	XP_034698228.1transmembrane protein 184 homolog DDB_G0279555-like	275	3	3.5e-187	0.9794	Vitis riparia	0.9818	1	GO:0016021		IPR005178;noIPR;IPR005178	;;
Vitvi10g04262_t001	XP_034698220.1beta-galactosidase 8-like isoform X1	945	2	0	0.9975	Vitis riparia	0.9976	3	GO:0004553;GO:0005975;GO:0030246	EC:3.2.1	IPR001944;IPR000922;IPR043159;IPR041392;noIPR;noIPR;IPR031330;noIPR;IPR001944;noIPR;IPR019801;IPR000922;IPR008979;IPR008979;IPR017853	GO:0004553/GO:0005975;GO:0030246;;;;;;;GO:0004553/GO:0005975;;GO:0004553/GO:0005975;GO:0030246;;;
Vitvi10g01757_t001	XP_002267927.2 quinone oxidoreductase PIG3 isoform X1	325	2	2.1e-231	0.9938	Vitis vinifera	1	1	GO:0016491	EC:1	IPR020843;IPR013154;IPR014189;noIPR;IPR013149;noIPR;noIPR;noIPR;IPR014189;IPR036291;IPR011032	GO:0016491;;;;;;;;;;
Vitvi10g01757_t002	XP_002267927.2 quinone oxidoreductase PIG3 isoform X1	325	8	2.2e-224	0.9723	Vitis vinifera	0.9877	1	GO:0016491	EC:1	IPR020843;noIPR;IPR014189;IPR013149;IPR013154;noIPR;noIPR;noIPR;IPR014189;IPR011032;IPR036291	GO:0016491;;;;;;;;;;
Vitvi10g04263_t001	GAY34393.1hypothetical protein CUMW_011180	99	2	9.2e-14	0.8163	Citrus unshiu	0.8163	5	GO:0003676;GO:0004519;GO:0006308;GO:0046872;GO:0090305	EC:3.1	noIPR
Vitvi10g00406_t001	XP_002267215.2PREDICTED: uncharacterized protein LOC100258948	274	2	4.3e-203	0.9944	Vitis vinifera	1				IPR009646;noIPR;noIPR	;;
Vitvi10g00405_t001	XP_002265624.2PREDICTED: uncharacterized protein LOC100258152	412	3	5.5e-248	0.9864	Vitis vinifera	1				IPR009646;noIPR;noIPR;noIPR	;;;
Vitvi10g04264_t001	RVW46305.1hypothetical protein CK203_075871	357	9	4.3e-154	0.7882	Vitis vinifera	0.796				noIPR;noIPR	;
Vitvi10g00402_t001	XP_002267118.3PREDICTED: uncharacterized protein LOC100241834	356	3	1.1e-267	0.9972	Vitis vinifera	1				IPR009646;noIPR;noIPR	;;
Vitvi10g00401_t001	XP_010646779.1 endonuclease 4	352	2	6.7e-246	0.9985	Vitis vinifera	1	3	GO:0003676;GO:0004519;GO:0006308	EC:3.1	IPR003154;IPR008947;IPR003154;noIPR;IPR003154;IPR008947	GO:0004519/GO:0006308/GO:0003676;GO:0016788;GO:0004519/GO:0006308/GO:0003676;;GO:0004519/GO:0006308/GO:0003676;GO:0016788
Vitvi10g00400_t001	XP_002269205.1endonuclease 1	307	4	1.2e-237	0.9902	Vitis vinifera	1	5	GO:0003676;GO:0004519;GO:0006308;GO:0046872;GO:0090305	EC:3.1	IPR003154;IPR008947;IPR003154;noIPR;IPR003154;IPR008947	GO:0004519/GO:0006308/GO:0003676;GO:0016788;GO:0004519/GO:0006308/GO:0003676;;GO:0004519/GO:0006308/GO:0003676;GO:0016788
Vitvi10g04265_t001	---NA---	92									noIPR;noIPR;noIPR	;;
Vitvi10g00399_t001	XP_002262771.2 internal alternative NAD(P)H-ubiquinone oxidoreductase A1, mitochondrial	546	3	0	0.9969	Vitis vinifera	1	2	GO:0003954;GO:0006116	EC:1.6	noIPR;noIPR;IPR023753;noIPR;IPR045024;noIPR;IPR036188;IPR036188	;;GO:0016491;;GO:0003954/GO:0006116;;;
Vitvi10g01756_t001	XP_002275178.2hypothetical protein ES288_A10G023800v1	60	20	2.5e-13	0.7597	Gossypium tomentosum/Gossypium darwinii	0.75	1	GO:0016020		noIPR;noIPR	;
Vitvi10g04266_t001	KAG6696678.1hypothetical protein I3842_09G160300	70	3	2.2e-08	0.7891	Carya illinoinensis	0.825				noIPR
Vitvi10g04267_t001	KAB2082050.1hypothetical protein ES319_A05G172400v1	140	8	4e-15	0.7684	Gossypium tomentosum/Gossypium barbadense/Gossypium hirsutum/Gossypium harknessii/Gossypium mustelinum/Gossypium darwinii/Gossypium raimondii	0.7586				noIPR;noIPR;noIPR	;;
Vitvi10g01754_t001	KAB2007330.1hypothetical protein ES319_D10G022400v1	60	8	4.7e-18	0.8108	Gossypium tomentosum/Gossypium barbadense/Gossypium hirsutum/Gossypium mustelinum/Gossypium darwinii	0.7931				noIPR
Vitvi10g04268_t001	CBI18596.3unnamed protein product, partial	78	1	9.9e-39	1	Vitis vinifera	1				noIPR;noIPR	;
Vitvi10g04269_t001	---NA---	99
Vitvi10g00398_t001	XP_002266810.2 PAP-specific phosphatase HAL2-like	456	2	0	0.9967	Vitis vinifera	1	4	GO:0006790;GO:0008441;GO:0046854;GO:0046855	EC:3.1.3.7	IPR000760;IPR006239;noIPR;IPR000760;noIPR;noIPR;noIPR;IPR020550;IPR020583;noIPR;noIPR	GO:0046855;GO:0006790/GO:0008441;;GO:0046855;;;;GO:0046854;;;
Vitvi10g01753_t001	XP_010646777.1cold shock domain-containing protein 4-like	155	2	1.4e-88	0.9806	Vitis vinifera	0.9935				noIPR
Vitvi10g04270_t001	CAN82670.1hypothetical protein VITISV_026489	70	1	1.9e-41	1	Vitis vinifera	1
Vitvi10g00397_t001	XP_010646776.1secretory carrier-associated membrane protein 3	312	1	3e-213	1	Vitis vinifera/Vitis riparia	1	2	GO:0015031;GO:0016021		noIPR;IPR007273;noIPR;noIPR;noIPR;IPR007273	;GO:0016021/GO:0015031;;;;GO:0016021/GO:0015031
Vitvi10g04271_t001	XP_010646775.1PREDICTED: uncharacterized protein LOC100257753	412	2	0	1	Vitis vinifera	1				IPR007877;noIPR;IPR007877	;;
Vitvi10g04271_t002	XP_010646775.1PREDICTED: uncharacterized protein LOC100257753	412	2	0	1	Vitis vinifera	1				IPR007877;noIPR;IPR007877	;;
Vitvi10g04272_t001	XP_034696988.1uncharacterized protein LOC117922890 isoform X1	462	2	0	0.9663	Vitis riparia	1	1	GO:0005515		noIPR;IPR001487;IPR001487;IPR036427;noIPR;noIPR;noIPR;noIPR;noIPR;noIPR;noIPR;noIPR;IPR001487;noIPR;IPR036427	;GO:0005515;GO:0005515;GO:0005515;;;;;;;;;GO:0005515;;GO:0005515
Vitvi10g04273_t001	XP_003635573.3 katanin p80 WD40 repeat-containing subunit B1 homolog isoform X1	901	3	0	0.9971	Vitis vinifera	0.9988	3	GO:0008017;GO:0008352;GO:0051013		IPR020472;IPR001680;IPR015943;IPR015943;IPR028021;IPR001680;noIPR;noIPR;noIPR;noIPR;noIPR;noIPR;noIPR;IPR019775;IPR019775;IPR001680;IPR001680;noIPR;IPR026962;noIPR;IPR001680;IPR001680;noIPR;IPR001680;noIPR;noIPR;IPR036322	;GO:0005515;GO:0005515;GO:0005515;GO:0008017;GO:0005515;;;;;;;;;;GO:0005515;GO:0005515;;GO:0008352/GO:0008017/GO:0051013;;GO:0005515;GO:0005515;;GO:0005515;;;GO:0005515
Vitvi10g04273_t002	XP_003635573.3 katanin p80 WD40 repeat-containing subunit B1 homolog isoform X1	901	3	0	0.9971	Vitis vinifera	0.9988	3	GO:0008017;GO:0008352;GO:0051013		IPR020472;IPR001680;IPR015943;IPR015943;IPR028021;IPR001680;noIPR;noIPR;noIPR;noIPR;noIPR;noIPR;IPR019775;IPR019775;IPR001680;IPR001680;noIPR;noIPR;IPR001680;IPR001680;IPR001680;noIPR;noIPR;IPR026962;noIPR;IPR036322	;GO:0005515;GO:0005515;GO:0005515;GO:0008017;GO:0005515;;;;;;;;;GO:0005515;GO:0005515;;;GO:0005515;GO:0005515;GO:0005515;;;GO:0008352/GO:0008017/GO:0051013;;GO:0005515
Vitvi10g04273_t003	XP_003635573.3 katanin p80 WD40 repeat-containing subunit B1 homolog isoform X1	820	3	0	0.9968	Vitis vinifera	0.9986	3	GO:0008017;GO:0008352;GO:0051013		IPR020472;IPR001680;IPR028021;IPR015943;IPR001680;IPR015943;noIPR;noIPR;noIPR;noIPR;noIPR;noIPR;noIPR;IPR019775;IPR019775;IPR001680;IPR001680;noIPR;noIPR;IPR001680;IPR001680;noIPR;IPR001680;noIPR;IPR026962;noIPR;IPR036322	;GO:0005515;GO:0008017;GO:0005515;GO:0005515;GO:0005515;;;;;;;;;;GO:0005515;GO:0005515;;;GO:0005515;GO:0005515;;GO:0005515;;GO:0008352/GO:0008017/GO:0051013;;GO:0005515
Vitvi10g00417_t001	XP_034698637.1protein STRUBBELIG-RECEPTOR FAMILY 1-like isoform X2	741	2	0	0.9865	Vitis riparia	0.9865	4	GO:0004672;GO:0005515;GO:0005524;GO:0006468	EC:2.7.1	IPR032675;noIPR;noIPR;IPR001245;IPR001611;noIPR;noIPR;noIPR;IPR000719;IPR011009;noIPR	;;;GO:0004672/GO:0006468;GO:0005515;;;;GO:0005524/GO:0004672/GO:0006468;;
Vitvi10g00417_t002	XP_034698635.1protein STRUBBELIG-RECEPTOR FAMILY 1-like isoform X1	772	2	0	0.9868	Vitis riparia	0.987	4	GO:0004672;GO:0005515;GO:0005524;GO:0006468	EC:2.7.1	IPR001611;noIPR;IPR032675;IPR001245;noIPR;noIPR;noIPR;noIPR;IPR000719;noIPR;IPR011009	GO:0005515;;;GO:0004672/GO:0006468;;;;;GO:0005524/GO:0004672/GO:0006468;;
Vitvi10g00417_t003	XP_034698635.1protein STRUBBELIG-RECEPTOR FAMILY 1-like isoform X1	772	2	0	0.9868	Vitis riparia	0.987	4	GO:0004672;GO:0005515;GO:0005524;GO:0006468	EC:2.7.1	IPR001611;noIPR;IPR032675;IPR001245;noIPR;noIPR;noIPR;noIPR;IPR000719;noIPR;IPR011009	GO:0005515;;;GO:0004672/GO:0006468;;;;;GO:0005524/GO:0004672/GO:0006468;;
Vitvi10g04274_t001	XP_034697403.1lipoyl synthase, mitochondrial	393	2	4.2e-286	0.9949	Vitis riparia	0.9949	8	GO:0005739;GO:0009107;GO:0009249;GO:0016992;GO:0046872;GO:0051539;GO:0102552;GO:0102553	EC:2.8.1.8	IPR006638;IPR007197;IPR013785;IPR031691;IPR003698;IPR003698;noIPR;IPR003698;noIPR;IPR007197;IPR003698;IPR027527;noIPR;noIPR	GO:0003824/GO:0051536;GO:0003824/GO:0051536;GO:0003824;;GO:0009107/GO:0016992/GO:0051539;GO:0009107/GO:0016992/GO:0051539;;GO:0009107/GO:0016992/GO:0051539;;GO:0003824/GO:0051536;GO:0009107/GO:0016992/GO:0051539;GO:0005739/GO:0016992/GO:0051539/GO:0009107;;
Vitvi10g04275_t001	---NA---	102
Vitvi10g01760_t001	XP_010647013.1 serine/arginine repetitive matrix protein 1-like	285	2	2.1e-170	0.9965	Vitis vinifera	1				noIPR;noIPR;noIPR;noIPR;noIPR;noIPR;noIPR;noIPR;noIPR	;;;;;;;;
Vitvi10g00422_t001	XP_003634857.1PREDICTED: uncharacterized protein LOC100854976	155	2	1.3e-109	0.9935	Vitis vinifera/Vitis riparia	1	1	GO:0016021		noIPR;noIPR;noIPR;noIPR	;;;
Vitvi10g00423_t001	XP_010645363.1 influenza virus NS1A-binding protein homolog A	284	6	1.7e-210	0.9947	Vitis vinifera	1	1	GO:0005515		IPR006652;IPR006652;IPR015915;noIPR;noIPR;IPR015915	GO:0005515;GO:0005515;GO:0005515;;;GO:0005515
Vitvi10g04276_t001	KAB1199873.1hypothetical protein CJ030_MR0G011032	93	9	3.7e-37	0.7862	Morella rubra	0.7802				noIPR;noIPR	;
Vitvi10g04277_t001	XP_010645359.1 glucose-induced degradation protein 8 homolog isoform X1	242	4	2.3e-164	0.9928	Vitis vinifera	1	1	GO:0005515		noIPR;IPR006595;IPR013144;IPR006594;IPR006594;IPR024964;noIPR;noIPR;IPR006595;IPR006594	;;;GO:0005515;GO:0005515;;;;;GO:0005515
Vitvi10g04277_t002	XP_010645361.1 glucose-induced degradation protein 8 homolog isoform X2	241	3	8.5e-164	0.9931	Vitis vinifera	1	1	GO:0005515		noIPR;IPR006594;IPR013144;IPR006595;IPR006594;IPR024964;noIPR;noIPR;IPR006594;IPR006595	;GO:0005515;;;GO:0005515;;;;GO:0005515;
Vitvi10g04277_t003	XP_010645359.1 glucose-induced degradation protein 8 homolog isoform X1	242	3	2.6e-163	0.9931	Vitis vinifera	0.9959	1	GO:0005515		noIPR;IPR006595;IPR013144;IPR006594;IPR006594;IPR024964;noIPR;noIPR;IPR006595;IPR006594	;;;GO:0005515;GO:0005515;;;;;GO:0005515
Vitvi10g00425_t001	XP_002263027.3 helicase-like transcription factor CHR28 isoform X1	1434	5	0	0.982	Vitis vinifera	1	5	GO:0004386;GO:0005524;GO:0016021;GO:0046872;GO:0070615		noIPR;IPR001841;IPR014001;IPR001650;IPR038718;IPR027417;IPR038718;IPR001650;IPR018957;IPR000330;IPR013083;noIPR;noIPR;noIPR;noIPR;noIPR;noIPR;IPR017907;IPR001650;IPR014001;IPR001841;noIPR;noIPR;IPR027417;noIPR;IPR027417	;;;;;;;;GO:0046872;GO:0005524/GO:0070615;;;;;;;;;;;;;;;;
Vitvi10g00426_t001	XP_003634858.1 caffeoylshikimate esterase	314	2	1.1e-234	0.9984	Vitis vinifera	1	2	GO:0016020;GO:0016298	EC:3.1.1	IPR000073;IPR022742;IPR029058;noIPR;noIPR;IPR029058	;;;;;
Vitvi10g00427_t001	XP_010645362.2 serine carboxypeptidase-like 31	481	5	0	0.9857	Vitis vinifera	1	5	GO:0004185;GO:0005576;GO:0005773;GO:0006508;GO:0016021	EC:3.4.21;EC:3.4.16	IPR001563;noIPR;IPR029058;IPR001563;noIPR;noIPR;IPR001563;IPR018202;IPR029058	GO:0004185/GO:0006508;;;GO:0004185/GO:0006508;;;GO:0004185/GO:0006508;GO:0004185;
Vitvi10g01600_t001	XP_010645364.1 (E,E)-geranyllinalool synthase	837	3	0	0.9885	Vitis vinifera	1	3	GO:0000287;GO:0010333;GO:0016102	EC:4.2.3	IPR001906;IPR005630;IPR008949;IPR036965;noIPR;noIPR;noIPR;noIPR;IPR008949;IPR008930;IPR008930	GO:0016829/GO:0010333;GO:0016829/GO:0000287/GO:0010333;;GO:0016829/GO:0010333;;;;;;;
Vitvi10g04278_t001	XP_034697901.1COP1-interacting protein 7 isoform X2	324	5	5.6e-195	0.998	Vitis riparia	1				noIPR;noIPR;noIPR;noIPR;noIPR;noIPR	;;;;;
Vitvi10g00435_t001	XP_002271939.2 disease resistance-like protein CSA1	194	2	1e-143	1	Vitis vinifera	1	2	GO:0003953;GO:0007165	EC:3.2.2	IPR000157;IPR000157;IPR035897;noIPR;noIPR;IPR000157;IPR035897	GO:0003953/GO:0007165;GO:0003953/GO:0007165;;;;GO:0003953/GO:0007165;
Vitvi10g00436_t001	XP_002271908.2 alpha-galactosidase isoform X1	404	3	0	0.9917	Vitis vinifera	0.9975	3	GO:0005975;GO:0009505;GO:0052692	EC:3.2.1.22	IPR002241;IPR013780;IPR013785;IPR002241;IPR041233;IPR002241;noIPR;IPR000111;IPR002241;noIPR;IPR017853	GO:0004553/GO:0005975;;GO:0003824;GO:0004553/GO:0005975;;GO:0004553/GO:0005975;;GO:0004553/GO:0005975;GO:0004553/GO:0005975;;
Vitvi10g04279_t001	CAN81856.1hypothetical protein VITISV_041251	321	1	4.5e-36	0.4202	Vitis vinifera	0.4202
Vitvi10g00437_t001	XP_003635288.1 NAC transcription factor 25	326	3	1.4e-241	0.998	Vitis vinifera	1	2	GO:0003677;GO:0006355		IPR003441;IPR036093;noIPR;noIPR;noIPR;noIPR;IPR003441;IPR036093	GO:0003677/GO:0006355;GO:0003677/GO:0006355;;;;;GO:0003677/GO:0006355;GO:0003677/GO:0006355
Vitvi10g04280_t001	RVX08505.1(E,E)-geranyllinalool synthase	330	5	5.4e-236	0.9908	Vitis vinifera	0.9939	2	GO:0000287;GO:0010333	EC:4.2.3	IPR001906;noIPR;IPR036965;noIPR;noIPR;noIPR;IPR008930;IPR008930	GO:0016829/GO:0010333;;GO:0016829/GO:0010333;;;;;
Vitvi10g04281_t001	RVX08505.1(E,E)-geranyllinalool synthase	482	6	0	0.9868	Vitis vinifera	0.9896	2	GO:0000287;GO:0010333	EC:4.2.3	IPR008949;IPR036965;IPR005630;noIPR;noIPR;IPR008930;IPR008949	;GO:0016829/GO:0010333;GO:0016829/GO:0000287/GO:0010333;;;;
Vitvi10g04282_t001	NP_001268201.1(E,E)-geranyllinalool synthase-like	820	3	0	0.984	Vitis vinifera	1	2	GO:0000287;GO:0010333	EC:4.2.3	noIPR;IPR005630;IPR036965;IPR001906;IPR008949;noIPR;noIPR;noIPR;IPR008930;IPR008930;IPR008949	;GO:0016829/GO:0000287/GO:0010333;GO:0016829/GO:0010333;GO:0016829/GO:0010333;;;;;;;
Vitvi10g04283_t001	XP_010645359.1 glucose-induced degradation protein 8 homolog isoform X1	410	20	6.8e-151	0.9874	Vitis vinifera	1	4	GO:0005515;GO:0005634;GO:0005737;GO:0043161		noIPR;IPR006595;IPR013144;IPR006594;IPR006594;IPR024964;noIPR;noIPR;IPR006594;IPR006595	;;;GO:0005515;GO:0005515;;;;GO:0005515;
Vitvi10g04284_t001	KAB1199873.1hypothetical protein CJ030_MR0G011032	93	7	2.6e-37	0.7953	Morella rubra	0.7912				noIPR;noIPR	;
Vitvi10g00420_t001	XP_019074022.1 influenza virus NS1A-binding protein homolog A-like	367	3	5.4e-278	0.9946	Vitis vinifera	1	1	GO:0005515		IPR006652;IPR015915;IPR006652;noIPR;noIPR;noIPR;noIPR;IPR015915	GO:0005515;GO:0005515;GO:0005515;;;;;GO:0005515
Vitvi10g02345_t001	XP_010646902.1PREDICTED: uncharacterized protein LOC100249879	894	3	0	0.9952	Vitis vinifera	1	2	GO:0060623;GO:0071922		IPR022771;IPR011989;noIPR;IPR039874;IPR016024	;;;;
Vitvi10g02346_t001	RVX08453.1 Bifunctional epoxide hydrolase 2	311	1	5.4e-236	1	Vitis vinifera	1	1	GO:0016787	EC:3	IPR000639;IPR029058;IPR000073;noIPR;noIPR;IPR029058	GO:0003824;;;;;
Vitvi10g02348_t001	XP_019073959.1 protein RTF1 homolog	541	3	2.1e-271	0.7345	Vitis vinifera	0.7394				noIPR;noIPR;noIPR;noIPR;noIPR;noIPR;noIPR;noIPR;noIPR;noIPR	;;;;;;;;;
Vitvi10g04285_t001	XP_019074187.1 lactosylceramide 4-alpha-galactosyltransferase	451	2	0	0.9889	Vitis vinifera	0.9911	1	GO:0016021		IPR007652;IPR007577;noIPR;noIPR;IPR044789;IPR029044	;;;;;
Vitvi10g02344_t001	RVX08451.1RNA polymerase II C-terminal domain phosphatase-like 1	726	3	0	0.9995	Vitis vinifera	1	7	GO:0003723;GO:0005634;GO:0008420;GO:0016021;GO:0070940;GO:0106306;GO:0106307	EC:3.1.3.16	IPR004274;IPR004274;IPR023214;noIPR;noIPR;IPR039189;IPR004274;IPR036412	;;;;;GO:0008420/GO:0070940;;
Vitvi10g04286_t001	RVX08452.1RNA polymerase II C-terminal domain phosphatase-like 1	160	5	2.4e-105	0.9988	Vitis vinifera	1	12	GO:0003723;GO:0004647;GO:0005634;GO:0008420;GO:0009611;GO:0009651;GO:0009738;GO:0016829;GO:0045892;GO:0070940;GO:0106306;GO:0106307	EC:3.1.3.16;EC:4;EC:3.1.3.3	IPR014720;IPR014720;noIPR;noIPR;noIPR;noIPR;noIPR;noIPR;IPR002220;IPR014720;noIPR	;;;;;;;;GO:0016829;;
Vitvi10g04286_t002	RVX08452.1RNA polymerase II C-terminal domain phosphatase-like 1	240	1	7.1e-128	1	Vitis vinifera	1	2	GO:0003723;GO:0016829	EC:4	IPR014720;IPR014720;noIPR;noIPR;noIPR;IPR002220;noIPR;IPR014720;noIPR	;;;;;GO:0016829;;;
Vitvi10g02343_t001	XP_003635272.1 clathrin light chain 1	375	3	2.3e-235	0.9854	Vitis vinifera	1	7	GO:0005198;GO:0006886;GO:0030130;GO:0030132;GO:0032050;GO:0048268;GO:0072583		noIPR;IPR000996;noIPR;noIPR;noIPR;noIPR;noIPR;IPR000996;noIPR	;GO:0005198/GO:0006886/GO:0030130/GO:0030132/GO:0016192;;;;;;GO:0005198/GO:0006886/GO:0030130/GO:0030132/GO:0016192;
Vitvi10g02342_t001	XP_003635271.2 putative serine/threonine-protein kinase	364	4	1.7e-263	0.9892	Vitis vinifera	1	4	GO:0004674;GO:0005524;GO:0005886;GO:0046777	EC:2.7.1	IPR000719;IPR001245;noIPR;noIPR;noIPR;noIPR;noIPR;noIPR;noIPR;IPR017441;IPR008271;IPR000719;noIPR;IPR011009	GO:0005524/GO:0004672/GO:0006468;GO:0004672/GO:0006468;;;;;;;;GO:0005524;GO:0004672/GO:0006468;GO:0005524/GO:0004672/GO:0006468;;
Vitvi10g02342_t002	XP_003635271.2 putative serine/threonine-protein kinase	364	4	1.7e-263	0.9892	Vitis vinifera	1	4	GO:0004674;GO:0005524;GO:0005886;GO:0046777	EC:2.7.1	IPR000719;IPR001245;noIPR;noIPR;noIPR;noIPR;noIPR;noIPR;noIPR;IPR017441;IPR008271;IPR000719;noIPR;IPR011009	GO:0005524/GO:0004672/GO:0006468;GO:0004672/GO:0006468;;;;;;;;GO:0005524;GO:0004672/GO:0006468;GO:0005524/GO:0004672/GO:0006468;;
Vitvi10g02342_t003	XP_003635271.2 putative serine/threonine-protein kinase	262	5	2.1e-186	0.9585	Vitis vinifera	0.9962	4	GO:0004674;GO:0005524;GO:0005886;GO:0046777	EC:2.7.1	IPR000719;noIPR;noIPR;IPR001245;noIPR;noIPR;noIPR;noIPR;noIPR;noIPR;IPR017441;IPR008271;IPR000719;IPR011009	GO:0005524/GO:0004672/GO:0006468;;;GO:0004672/GO:0006468;;;;;;;GO:0005524;GO:0004672/GO:0006468;GO:0005524/GO:0004672/GO:0006468;
Vitvi10g02333_t001	XP_010647094.1PREDICTED: uncharacterized protein At4g04980	816	3	0	0.9831	Vitis vinifera	1				noIPR;noIPR;noIPR;noIPR;noIPR;noIPR;noIPR;noIPR;IPR040265;noIPR;IPR040265	;;;;;;;;;;
Vitvi10g02334_t001	CBI38447.3unnamed protein product, partial	333	1	8.3e-233	1	Vitis vinifera	1				noIPR;noIPR;noIPR;IPR040265;noIPR	;;;;
Vitvi10g04287_t001	ALP46091.1polyphenol oxidase	461	5	2.3e-280	0.9048	Vitis vinifera	0.8966	3	GO:0004097;GO:0046148;GO:0046872	EC:1.10.3.1	IPR002227;IPR022740;IPR022739;IPR002227;IPR008922;noIPR;noIPR;IPR013788;IPR002227;IPR008922	GO:0016491;GO:0004097;GO:0004097;GO:0016491;;;;;GO:0016491;
Vitvi10g04288_t001	XP_010647098.2 polyphenol oxidase, chloroplastic-like	443	3	8e-260	0.6752	Vitis vinifera	0.6872	1	GO:0004097	EC:1.10.3.1	IPR002227;IPR008922;IPR002227;IPR022740;noIPR;noIPR;noIPR;noIPR;noIPR;noIPR;noIPR;IPR008922	GO:0016491;;GO:0016491;GO:0004097;;;;;;;;
Vitvi10g02336_t001	RVX08548.1Polyphenol oxidase, chloroplastic	555	1	0	0.8574	Vitis vinifera	0.8574	3	GO:0004097;GO:0046148;GO:0046872	EC:1.10.3.1	IPR002227;IPR022739;IPR002227;IPR022740;IPR016213;IPR008922;noIPR;noIPR;noIPR;noIPR;noIPR;noIPR;noIPR;noIPR;IPR002227;IPR013788;IPR008922	GO:0016491;GO:0004097;GO:0016491;GO:0004097;GO:0046148/GO:0004097;;;;;;;;;;GO:0016491;;
Vitvi10g04289_t001	P43311.1RecName: Full=Polyphenol oxidase, chloroplastic; Short=PPO; AltName: Full=Catechol oxidase; Flags: Precursor	607	8	0	0.9798	Vitis sp./Vitis vinifera	0.9835	4	GO:0004097;GO:0009543;GO:0046148;GO:0046872	EC:1.10.3.1	IPR002227;IPR022739;IPR002227;IPR022740;IPR008922;IPR016213;noIPR;noIPR;noIPR;noIPR;noIPR;noIPR;noIPR;IPR013788;IPR002227;IPR002227;IPR008922	GO:0016491;GO:0004097;GO:0016491;GO:0004097;;GO:0046148/GO:0004097;;;;;;;;;GO:0016491;GO:0016491;
Vitvi10g04290_t001	CBI38449.3unnamed protein product, partial	75	1	7.7e-29	1	Vitis vinifera	1
Vitvi10g04291_t001	---NA---	61
Vitvi10g04292_t001	P43311.1RecName: Full=Polyphenol oxidase, chloroplastic; Short=PPO; AltName: Full=Catechol oxidase; Flags: Precursor	679	8	0	0.9866	Vitis sp./Vitis vinifera	0.9948	4	GO:0004097;GO:0009543;GO:0046148;GO:0046872	EC:1.10.3.1	IPR002227;IPR022740;IPR022739;IPR002227;IPR008922;noIPR;noIPR;noIPR;noIPR;noIPR;noIPR;noIPR;IPR002227;IPR013788;IPR002227;IPR008922	GO:0016491;GO:0004097;GO:0004097;GO:0016491;;;;;;;;;GO:0016491;;GO:0016491;
Vitvi10g04293_t001	---NA---	103
Vitvi10g04294_t001	XP_019074153.1 protein MOR1 isoform X3	2032	10	0	0.9839	Vitis vinifera	0.9847	5	GO:0007051;GO:0030951;GO:0046785;GO:0051010;GO:0061863	EC:2	noIPR;IPR034085;IPR011989;IPR011989;IPR011989;IPR011989;IPR011989;IPR024395;noIPR;noIPR;noIPR;noIPR;noIPR;noIPR;noIPR;noIPR;IPR045110;noIPR;IPR021133;IPR016024;IPR016024	;;;;;;;;;;;;;;;;GO:0051010/GO:0046785/GO:0061863/GO:0030951/GO:0007051;;;;
Vitvi10g04294_t002	XP_010647268.1 protein MOR1 isoform X1	2035	10	0	0.9842	Vitis vinifera	0.9848	5	GO:0007051;GO:0030951;GO:0046785;GO:0051010;GO:0061863	EC:2	noIPR;IPR034085;IPR011989;IPR011989;IPR011989;IPR011989;IPR011989;IPR024395;noIPR;noIPR;noIPR;noIPR;noIPR;noIPR;noIPR;noIPR;IPR045110;noIPR;IPR021133;IPR016024;IPR016024	;;;;;;;;;;;;;;;;GO:0051010/GO:0046785/GO:0061863/GO:0030951/GO:0007051;;;;
Vitvi10g01762_t001	XP_002271088.1PREDICTED: uncharacterized protein LOC100263752	180	3	3.1e-118	0.9512	Vitis vinifera	0.9834	1	GO:0016021		IPR009606;noIPR;noIPR	;;
Vitvi10g04295_t001	XP_002268276.2 dof zinc finger protein DOF1.1	159	3	1.1e-106	0.9958	Vitis vinifera	1	3	GO:0003677;GO:0005634;GO:0006355
Vitvi10g04296_t001	XP_034696928.1dof zinc finger protein 4-like	100	3	4.7e-37	0.7437	Vitis riparia	0.7453	2	GO:0003677;GO:0006355		IPR003851;noIPR;noIPR;noIPR;noIPR;IPR003851	GO:0003677/GO:0006355;;;;;GO:0003677/GO:0006355
Vitvi10g04297_t001	CAN71570.1hypothetical protein VITISV_008112	105	1	1.1e-41	0.7788	Vitis vinifera	0.7788
Vitvi10g04298_t001	XP_002270799.3 splicing factor 3B subunit 2	578	1	0	1	Vitis vinifera	1	1	GO:0005634		noIPR;noIPR;noIPR;IPR006568;IPR007180;IPR006568;noIPR;noIPR;noIPR;noIPR;noIPR;noIPR;noIPR;noIPR;noIPR;noIPR;noIPR;noIPR;noIPR	;;;;GO:0005634;;;;;;;;;;;;;;
Vitvi10g04299_t001	RVX08594.1putative polyol transporter 4	522	3	0	0.9981	Vitis vinifera	1	3	GO:0016021;GO:0022857;GO:0055085	EC:7	IPR003663;IPR036259;IPR003663;IPR005828;noIPR;noIPR;IPR005829;IPR005829;IPR005829;IPR020846;IPR036259	GO:0055085/GO:0022857/GO:0016020;;GO:0055085/GO:0022857/GO:0016020;GO:0016021/GO:0055085/GO:0022857;;;GO:0016021/GO:0022857/GO:0055085;GO:0016021/GO:0022857/GO:0055085;GO:0016021/GO:0022857/GO:0055085;GO:0022857;
Vitvi10g02340_t001	XP_019074187.1 lactosylceramide 4-alpha-galactosyltransferase	451	2	0	0.9911	Vitis vinifera	0.9956	1	GO:0016021		IPR007577;IPR007652;noIPR;noIPR;IPR044789;IPR029044	;;;;;
Vitvi10g04300_t001	XP_010647227.1 mediator of RNA polymerase II transcription subunit 16	1246	2	0	0.992	Vitis vinifera	0.9936	2	GO:0006355;GO:0016592		noIPR;noIPR;noIPR;noIPR;IPR038836	;;;;GO:0016592/GO:0006355
Vitvi10g00450_t001	XP_002269604.1 trafficking protein particle complex subunit 13 isoform X1	438	3	0	0.9939	Vitis vinifera	1	1	GO:1990072		IPR010378;noIPR;IPR010378	;;
Vitvi10g00450_t002	XP_019074133.1 trafficking protein particle complex subunit 13 isoform X2	433	3	0	0.9901	Vitis vinifera	1	1	GO:1990072		IPR010378;IPR010378;noIPR	;;
Vitvi10g00451_t001	XP_003635423.1 stem-specific protein TSJT1	256	6	3.1e-192	0.9993	Arthrobacter sp. B1805	1				IPR024286;IPR029055;IPR024286;noIPR;IPR044828;noIPR;IPR029055	;;;;;;
Vitvi10g04301_t001	XP_010647203.1 splicing factor U2af large subunit B	552	4	0	0.991	Vitis vinifera	1	3	GO:0003723;GO:0005634;GO:0006397		IPR000504;IPR012677;IPR000504;IPR006529;IPR012677;IPR012677;noIPR;noIPR;noIPR;noIPR;noIPR;IPR000504;IPR000504;noIPR;noIPR;noIPR;IPR035979;IPR035979	GO:0003676;;GO:0003676;GO:0006397/GO:0005634/GO:0003723;;;;;;;;GO:0003676;GO:0003676;;;;GO:0003676;GO:0003676
Vitvi10g04301_t002	XP_034698917.1splicing factor U2af large subunit B-like isoform X7	520	2	0	0.993	Vitis riparia	0.998	3	GO:0003723;GO:0005634;GO:0006397		IPR000504;IPR012677;IPR012677;IPR000504;IPR012677;IPR006529;noIPR;noIPR;IPR000504;IPR000504;noIPR;noIPR;noIPR;IPR035979;IPR035979	GO:0003676;;;GO:0003676;;GO:0006397/GO:0005634/GO:0003723;;;GO:0003676;GO:0003676;;;;GO:0003676;GO:0003676
Vitvi10g04301_t003	XP_010647203.1 splicing factor U2af large subunit B	551	4	0	0.9901	Vitis vinifera	0.9982	3	GO:0003723;GO:0005634;GO:0006397		IPR000504;IPR012677;IPR012677;IPR000504;IPR006529;IPR012677;noIPR;noIPR;noIPR;noIPR;noIPR;IPR000504;IPR000504;noIPR;noIPR;noIPR;IPR035979;IPR035979	GO:0003676;;;GO:0003676;GO:0006397/GO:0005634/GO:0003723;;;;;;;GO:0003676;GO:0003676;;;;GO:0003676;GO:0003676
Vitvi10g04302_t001	XP_002269338.1 CBS domain-containing protein CBSX5	384	2	1.7e-276	0.9974	Vitis vinifera	1	8	GO:0005634;GO:0005737;GO:0016208;GO:0019887;GO:0019901;GO:0031588;GO:0042149;GO:0045859		noIPR;noIPR;noIPR;noIPR;noIPR	;;;;
Vitvi10g04303_t001	XP_002267812.1PREDICTED: uncharacterized protein LOC100248155	780	3	0	0.9936	Vitis vinifera	1	2	GO:0005515;GO:0016021		IPR011990;noIPR;IPR011990	GO:0005515;;GO:0005515
Vitvi10g00415_t001	XP_034698263.1E3 ubiquitin-protein ligase AIRP2-like	247	13	7.7e-179	0.9822	Vitis riparia	0.996	5	GO:0016021;GO:0016567;GO:0030148;GO:0042284;GO:0061630	EC:2;EC:1.14.19.17	IPR001841;noIPR;IPR013083;noIPR;noIPR;IPR017907;IPR001841;noIPR	;;;;;;;
Vitvi10g00415_t002	XP_034698263.1E3 ubiquitin-protein ligase AIRP2-like	208	20	1.1e-123	0.9789	Vitis vinifera	1	4	GO:0016021;GO:0016567;GO:0046872;GO:0061630	EC:2	IPR018957;IPR013083;noIPR;noIPR;IPR017907;noIPR	GO:0046872;;;;;
Vitvi10g00414_t001	XP_003635420.1 sphingolipid delta(4)-desaturase DES1-like	327	4	4.2e-248	0.9985	Vitis vinifera	1	4	GO:0005789;GO:0016021;GO:0042284;GO:0046513	EC:1.14.19.17	IPR013866;IPR011388;IPR005804;IPR013866;noIPR;noIPR;IPR011388	;GO:0030148/GO:0042284/GO:0016021;GO:0006629;;;;GO:0030148/GO:0042284/GO:0016021
Vitvi10g00414_t002	XP_003635420.1 sphingolipid delta(4)-desaturase DES1-like	327	4	4.2e-248	0.9985	Vitis vinifera	1	4	GO:0005789;GO:0016021;GO:0042284;GO:0046513	EC:1.14.19.17	IPR013866;IPR011388;IPR005804;IPR013866;noIPR;noIPR;IPR011388	;GO:0030148/GO:0042284/GO:0016021;GO:0006629;;;;GO:0030148/GO:0042284/GO:0016021
Vitvi10g00413_t001	XP_003635421.2 tetraspanin-19	211	3	6.1e-149	0.9905	Vitis vinifera	1	1	GO:0016021		noIPR;IPR018499;noIPR;noIPR	;GO:0016021;;
Vitvi10g04304_t001	XP_034698574.1general transcription and DNA repair factor IIH subunit TFB2	451	4	0	0.9933	Vitis riparia	0.9978	4	GO:0000439;GO:0001671;GO:0006289;GO:0050790		noIPR;IPR004598;IPR040662;IPR004598;IPR004598	;GO:0000439/GO:0006289/GO:0001671;;GO:0000439/GO:0006289/GO:0001671;GO:0000439/GO:0006289/GO:0001671
Vitvi10g04305_t001	---NA---	119
Vitvi10g04306_t001	XP_002266521.3PREDICTED: uncharacterized protein LOC100243438	142	1	1e-86	1	Vitis vinifera/Vitis riparia	1				noIPR;noIPR;noIPR	;;
Vitvi10g04307_t001	XP_034698264.1allantoinase	505	1	0	0.9921	Vitis riparia	0.9921	4	GO:0000256;GO:0004038;GO:0008270;GO:0050897	EC:3.5.2.5	IPR017593;IPR006680;noIPR;noIPR;noIPR;IPR032466;IPR011059	GO:0004038/GO:0050897/GO:0008270/GO:0000256;GO:0016787;;;;;GO:0016810
Vitvi10g04308_t001	RVW37892.1Endonuclease MutS2	1301	1	0	0.8444	Vitis vinifera	0.8444	7	GO:0004519;GO:0005524;GO:0006298;GO:0016887;GO:0030983;GO:0045910;GO:0090305	EC:3.1	noIPR;noIPR;noIPR;IPR007696;IPR002625;IPR024286;IPR000432;noIPR;IPR000432;IPR029055;IPR027417;IPR024286;IPR002625;IPR005747;IPR045076;IPR002625;IPR027417;IPR029055;IPR036187;IPR036063	;;;GO:0006298/GO:0030983/GO:0005524;;;GO:0006298/GO:0030983/GO:0005524;;GO:0006298/GO:0030983/GO:0005524;;;;;GO:0045910/GO:0030983/GO:0004519/GO:0016887;GO:0006298/GO:0030983/GO:0005524;;;;;
Vitvi10g00473_t001	XP_034698331.1putative nuclear RNA export factor SDE5 isoform X2	501	2	0	0.9811	Vitis riparia	0.982				noIPR;IPR013899;noIPR;IPR013899;noIPR;noIPR;noIPR	;;;;;;
Vitvi10g00473_t002	XP_034698331.1putative nuclear RNA export factor SDE5 isoform X2	501	2	0	0.9811	Vitis riparia	0.982				noIPR;IPR013899;noIPR;IPR013899;noIPR;noIPR;noIPR	;;;;;;
Vitvi10g00473_t003	XP_034698329.1putative nuclear RNA export factor SDE5 isoform X1	502	2	0	0.9811	Vitis riparia	0.9821				noIPR;noIPR;IPR013899;noIPR;IPR013899;noIPR;noIPR;noIPR	;;;;;;;
Vitvi10g00471_t001	XP_010655426.1 monothiol glutaredoxin-S17 isoform X1	492	2	0	0.9929	Vitis vinifera	0.9939	6	GO:0005634;GO:0005829;GO:0006879;GO:0046872;GO:0051536;GO:0097573	EC:1.8	noIPR;IPR004480;noIPR;IPR002109;IPR013766;noIPR;noIPR;noIPR;noIPR;noIPR;IPR004480;IPR004480;noIPR;noIPR;IPR004480;noIPR;noIPR;noIPR;IPR013766;IPR033658;IPR033658;IPR033658;noIPR;IPR036249;IPR036249;IPR036249;IPR036249	;;;GO:0097573;;;;;;;;;;;;;;;;;;;;;;;
Vitvi10g00470_t001	RVW95860.1Pentatricopeptide repeat-containing protein, mitochondrial	506	5	0	0.9929	Vitis vinifera	1	2	GO:0005515;GO:0005739		IPR002885;IPR011990;IPR019734;IPR002885;IPR002885;IPR011990;noIPR;noIPR;IPR002885;IPR002885;IPR019734;IPR011990	;GO:0005515;GO:0005515;;;GO:0005515;;;;;GO:0005515;GO:0005515
Vitvi10g00469_t001	XP_010655428.2 heat stress transcription factor B-2a	200	3	3.5e-146	0.9967	Vitis vinifera	1	4	GO:0003700;GO:0005634;GO:0006355;GO:0043565		noIPR;IPR000232;IPR000232;IPR036388;IPR000232;noIPR;IPR027725;IPR000232;IPR036390	;GO:0003700/GO:0043565/GO:0006355;GO:0003700/GO:0043565/GO:0006355;;GO:0003700/GO:0043565/GO:0006355;;;GO:0003700/GO:0043565/GO:0006355;
Vitvi10g02375_t001	CBI23535.3unnamed protein product, partial	245	1	1.3e-176	0.9959	Vitis vinifera	0.9959	5	GO:0005737;GO:0008202;GO:0016020;GO:0016628;GO:0050660	EC:1.3.1	IPR016169;IPR006094;noIPR;IPR040165;IPR036318	;GO:0050660/GO:0016491;;;GO:0050660
Vitvi10g02376_t001	RVW32031.1RNA-binding KH domain-containing protein RCF3	69	1	1.2e-27	0.8551	Vitis vinifera	0.8551	1	GO:0003723		IPR004088;IPR036612;noIPR;noIPR;noIPR;IPR036612	GO:0003723;GO:0003723;;;;GO:0003723
Vitvi10g04309_t001	XP_010647278.1 pentatricopeptide repeat-containing protein At2g20710, mitochondrial-like	488	1	0	1	Vitis vinifera/Vitis riparia	1	1	GO:0005515		IPR011990;IPR002885;IPR011990;IPR002885;noIPR;noIPR;IPR002885;IPR002885;IPR019734;IPR011990	GO:0005515;;GO:0005515;;;;;;GO:0005515;GO:0005515
Vitvi10g00452_t001	XP_002262822.1 E3 ubiquitin-protein ligase RMA1H1	240	3	4e-182	0.9958	Vitis vinifera/Vitis riparia	1	8	GO:0005783;GO:0006511;GO:0016021;GO:0016567;GO:0016874;GO:0044390;GO:0061630;GO:0071712	EC:2;EC:6	IPR001841;noIPR;IPR013083;IPR045103;noIPR;IPR017907;IPR001841;noIPR;noIPR	;;;GO:0005783/GO:0061630/GO:0006511;;;;;
Vitvi10g00452_t002	XP_002262822.1 E3 ubiquitin-protein ligase RMA1H1	240	3	4e-182	0.9958	Vitis vinifera/Vitis riparia	1	8	GO:0005783;GO:0006511;GO:0016021;GO:0016567;GO:0016874;GO:0044390;GO:0061630;GO:0071712	EC:2;EC:6	IPR001841;noIPR;IPR013083;IPR045103;noIPR;IPR017907;IPR001841;noIPR;noIPR	;;;GO:0005783/GO:0061630/GO:0006511;;;;;
Vitvi10g00452_t003	XP_002262822.1 E3 ubiquitin-protein ligase RMA1H1	240	3	4e-182	0.9958	Vitis vinifera/Vitis riparia	1	8	GO:0005783;GO:0006511;GO:0016021;GO:0016567;GO:0016874;GO:0044390;GO:0061630;GO:0071712	EC:2;EC:6	IPR001841;noIPR;IPR013083;IPR045103;noIPR;IPR017907;IPR001841;noIPR;noIPR	;;;GO:0005783/GO:0061630/GO:0006511;;;;;
Vitvi10g00452_t004	XP_002262822.1 E3 ubiquitin-protein ligase RMA1H1	240	3	4e-182	0.9958	Vitis vinifera/Vitis riparia	1	8	GO:0005783;GO:0006511;GO:0016021;GO:0016567;GO:0016874;GO:0044390;GO:0061630;GO:0071712	EC:2;EC:6	IPR001841;noIPR;IPR013083;IPR045103;noIPR;IPR017907;IPR001841;noIPR;noIPR	;;;GO:0005783/GO:0061630/GO:0006511;;;;;
Vitvi10g00452_t005	XP_002262822.1 E3 ubiquitin-protein ligase RMA1H1	240	3	4e-182	0.9958	Vitis vinifera/Vitis riparia	1	8	GO:0005783;GO:0006511;GO:0016021;GO:0016567;GO:0016874;GO:0044390;GO:0061630;GO:0071712	EC:2;EC:6	IPR001841;noIPR;IPR013083;IPR045103;noIPR;IPR017907;IPR001841;noIPR;noIPR	;;;GO:0005783/GO:0061630/GO:0006511;;;;;
Vitvi10g00452_t006	XP_002262822.1 E3 ubiquitin-protein ligase RMA1H1	240	3	4e-182	0.9958	Vitis vinifera/Vitis riparia	1	8	GO:0005783;GO:0006511;GO:0016021;GO:0016567;GO:0016874;GO:0044390;GO:0061630;GO:0071712	EC:2;EC:6	IPR001841;noIPR;IPR013083;IPR045103;noIPR;IPR017907;IPR001841;noIPR;noIPR	;;;GO:0005783/GO:0061630/GO:0006511;;;;;
Vitvi10g04310_t001	XP_034697568.1uncharacterized protein LOC117923411	161	1	2.3e-106	0.9877	Vitis riparia	0.9877				noIPR;noIPR;noIPR;noIPR	;;;
Vitvi10g04311_t001	XP_034698545.1methyltransferase N6AMT1	320	1	2.8e-184	0.9961	Vitis riparia	0.9961	3	GO:0003676;GO:0008168;GO:0032259	EC:2.1.1	IPR004557;noIPR;IPR007848;noIPR;noIPR;IPR002052;noIPR;IPR029063	GO:0008168;;GO:0008168;;;GO:0008168/GO:0032259/GO:0003676;;
Vitvi10g04312_t001	XP_034698543.1CASP-like protein 1C1	159	2	6.4e-96	0.9843	Vitis riparia	0.9874	2	GO:0005886;GO:0016021		IPR006702;IPR006459;noIPR;noIPR;noIPR	;;;;
Vitvi10g04313_t001	XP_002262974.3 probable 2-carboxy-D-arabinitol-1-phosphatase	283	3	2e-208	0.9772	Vitis vinifera	1				IPR013078;IPR013078;IPR029033;noIPR;noIPR;IPR013078;IPR029033	;;;;;;
Vitvi10g00467_t001	XP_002262997.2 cysteine--tRNA ligase 2, cytoplasmic	513	4	0	0.9498	Vitis vinifera	1	5	GO:0004817;GO:0005524;GO:0005737;GO:0006423;GO:0046872	EC:6.1.1.16	IPR024909;noIPR;IPR014729;IPR032678;IPR015803;IPR024909;noIPR;IPR015803;IPR032678;IPR009080;noIPR	;;;;GO:0006423/GO:0005524/GO:0004817;;;GO:0006423/GO:0005524/GO:0004817;;GO:0000166/GO:0004812/GO:0005524/GO:0006418;
Vitvi10g04314_t001	---NA---	92
Vitvi10g04315_t001	XP_002263680.1 3-deoxy-manno-octulosonate cytidylyltransferase, mitochondrial	220	4	6e-157	0.9886	Vitis vinifera/Vitis riparia	1	3	GO:0005829;GO:0008690;GO:0016021	EC:2.7.7.38	IPR004528;IPR029044;IPR003329;noIPR;noIPR;IPR004528;IPR029044	GO:0008690;;;;;GO:0008690;
Vitvi10g00465_t001	RVW95830.1Pentatricopeptide repeat-containing protein	587	2	0	0.9915	Vitis vinifera	0.9983	2	GO:0005515;GO:0008270		IPR002885;IPR011990;IPR002885;IPR032867;IPR002885;IPR011990;noIPR;noIPR;IPR002885;IPR002885;IPR002885;IPR002885;IPR002885	;GO:0005515;;GO:0008270;;GO:0005515;;;;;;;
Vitvi10g00462_t002	XP_019073827.1 callose synthase 11	1770	2	0	0.996	Vitis vinifera	0.9994	3	GO:0000148;GO:0003843;GO:0006075	EC:2.4.1.34	IPR026899;IPR026899;IPR003440;noIPR;noIPR;noIPR	;;GO:0003843/GO:0016020/GO:0000148/GO:0006075;;;
Vitvi10g00462_t001	XP_019073827.1 callose synthase 11	1770	2	0	0.996	Vitis vinifera	0.9994	3	GO:0000148;GO:0003843;GO:0006075	EC:2.4.1.34	IPR026899;IPR026899;IPR003440;noIPR;noIPR;noIPR	;;GO:0003843/GO:0016020/GO:0000148/GO:0006075;;;
Vitvi10g04316_t001	RVW95825.1hypothetical protein CK203_025823	75	1	7.6e-32	1	Vitis vinifera	1	1	GO:0016021
Vitvi10g00461_t001	RVW37915.1hypothetical protein CK203_094191	960	2	0	0.9932	Vitis vinifera	0.9927	1	GO:0016021		IPR021319;noIPR;IPR021319	;;
Vitvi10g01764_t001	XP_002267490.2 probable ubiquitin-conjugating enzyme E2 24	944	4	0	0.9921	Vitis vinifera	0.9979	2	GO:0016567;GO:0061631	EC:2.3.2.23	noIPR;IPR000608;IPR016135;noIPR;noIPR;noIPR;IPR000608;IPR000608;IPR016135	;;;;;;;;
Vitvi10g04317_t001	---NA---	160
Vitvi10g04318_t001	XP_010647554.1 50S ribosomal protein L21, mitochondrial	275	2	3e-174	0.9747	Vitis vinifera	0.9855	4	GO:0003723;GO:0003735;GO:0005840;GO:0006412		IPR028909;IPR001787;noIPR;noIPR;noIPR;IPR028909;IPR018258;IPR001787;IPR036164	GO:0005840;GO:0005840/GO:0006412/GO:0003723/GO:0003735;;;;GO:0005840;GO:0005840/GO:0006412/GO:0003723/GO:0003735;GO:0005840/GO:0006412/GO:0003723/GO:0003735;
Vitvi10g00459_t001	XP_002263191.1PREDICTED: uncharacterized protein LOC100261530	309	1	2.3e-220	0.9935	Vitis vinifera	0.9935				IPR006502;IPR006502;noIPR;IPR006502;noIPR	;;;;
Vitvi10g04319_t001	XP_034697582.1L-type lectin-domain containing receptor kinase VII.1-like	699	4	0	0.981	Vitis vinifera	0.9914	9	GO:0003676;GO:0004523;GO:0004672;GO:0005524;GO:0005886;GO:0006468;GO:0016021;GO:0030246;GO:0090502	EC:2.7.1;EC:3.1.30;EC:3.1.26.4	IPR000719;noIPR;noIPR;noIPR;IPR000719;IPR001220;noIPR;noIPR;noIPR;noIPR;IPR008271;IPR017441;IPR000719;IPR001220;noIPR;IPR011009;IPR013320	GO:0005524/GO:0004672/GO:0006468;;;;GO:0005524/GO:0004672/GO:0006468;GO:0030246;;;;;GO:0004672/GO:0006468;GO:0005524;GO:0005524/GO:0004672/GO:0006468;GO:0030246;;;
Vitvi10g04320_t001	XP_034697582.1L-type lectin-domain containing receptor kinase VII.1-like	699	4	0	0.981	Vitis vinifera	0.9914	9	GO:0003676;GO:0004523;GO:0004672;GO:0005524;GO:0005886;GO:0006468;GO:0016021;GO:0030246;GO:0090502	EC:2.7.1;EC:3.1.30;EC:3.1.26.4	IPR000719;noIPR;noIPR;noIPR;IPR000719;IPR001220;noIPR;noIPR;noIPR;noIPR;IPR008271;IPR017441;IPR000719;IPR001220;noIPR;IPR011009;IPR013320	GO:0005524/GO:0004672/GO:0006468;;;;GO:0005524/GO:0004672/GO:0006468;GO:0030246;;;;;GO:0004672/GO:0006468;GO:0005524;GO:0005524/GO:0004672/GO:0006468;GO:0030246;;;
Vitvi10g04321_t001	RVW95930.1L-type lectin-domain containing receptor kinase VII.1	698	9	0	0.9706	Vitis vinifera	0.9814	9	GO:0003676;GO:0004523;GO:0004672;GO:0005524;GO:0005886;GO:0006468;GO:0016021;GO:0030246;GO:0090502	EC:2.7.1;EC:3.1.30;EC:3.1.26.4	IPR000719;IPR000719;noIPR;IPR001220;noIPR;noIPR;noIPR;noIPR;noIPR;noIPR;IPR008271;IPR017441;IPR000719;IPR001220;noIPR;IPR013320;IPR011009	GO:0005524/GO:0004672/GO:0006468;GO:0005524/GO:0004672/GO:0006468;;GO:0030246;;;;;;;GO:0004672/GO:0006468;GO:0005524;GO:0005524/GO:0004672/GO:0006468;GO:0030246;;;
Vitvi10g00457_t001	RVW95930.1L-type lectin-domain containing receptor kinase VII.1	714	5	0	0.9948	Vitis vinifera	1	6	GO:0004672;GO:0005524;GO:0005886;GO:0006468;GO:0016021;GO:0030246	EC:2.7.1	IPR000719;noIPR;IPR000719;IPR001220;noIPR;noIPR;noIPR;noIPR;noIPR;noIPR;IPR008271;IPR017441;IPR000719;noIPR;IPR001220;IPR013320;IPR011009	GO:0005524/GO:0004672/GO:0006468;;GO:0005524/GO:0004672/GO:0006468;GO:0030246;;;;;;;GO:0004672/GO:0006468;GO:0005524;GO:0005524/GO:0004672/GO:0006468;;GO:0030246;;
Vitvi10g04322_t001	RVW95929.1L-type lectin-domain containing receptor kinase VII.1	292	2	2.4e-200	0.9966	Vitis vinifera	1	3	GO:0016301;GO:0016310;GO:0030246	EC:2.7	noIPR;IPR001220;IPR016363;noIPR;noIPR;IPR001220;IPR013320	;GO:0030246;GO:0030246;;;GO:0030246;
Vitvi10g00455_t001	XP_002270005.2PREDICTED: uncharacterized protein LOC100256311	618	3	0	0.9924	Vitis vinifera	1	7	GO:0005794;GO:0010246;GO:0016021;GO:0016757;GO:0045491;GO:0048358;GO:0080001	EC:2.4	IPR006852;noIPR;noIPR;noIPR;IPR006852;noIPR	;;;;;
Vitvi10g00454_t001	XP_019073831.1PREDICTED: uncharacterized protein LOC109122084	145	2	3.5e-101	1	Vitis vinifera	1	1	GO:0016021		noIPR;noIPR	;
Vitvi10g00453_t001	RVW37930.1Linoleate 13S-lipoxygenase 3-1, chloroplastic	576	3	0	0.9971	Vitis vinifera	0.9983	4	GO:0006633;GO:0016702;GO:0031408;GO:0046872	EC:1.13.11	IPR013819;IPR001246;IPR027433;noIPR;noIPR;IPR013819;IPR000907;noIPR;IPR020834;IPR020833;IPR013819;IPR036226	GO:0016702/GO:0046872;GO:0016491;;;;GO:0016702/GO:0046872;GO:0016702/GO:0046872;;GO:0016702/GO:0046872;GO:0016702/GO:0046872;GO:0016702/GO:0046872;
Vitvi10g04323_t001	XP_034697837.1linoleate 13S-lipoxygenase 3-1, chloroplastic-like	333	1	2.1e-212	0.9804	Vitis riparia	0.9804	3	GO:0005515;GO:0016702;GO:0046872	EC:1.13.11	IPR001246;IPR001024;IPR001024;noIPR;IPR013819;noIPR;noIPR;IPR000907;noIPR;IPR013819;IPR001024;IPR036226;IPR036392	GO:0016491;GO:0005515;GO:0005515;;GO:0016702/GO:0046872;;;GO:0016702/GO:0046872;;GO:0016702/GO:0046872;GO:0005515;;GO:0005515
Vitvi10g02253_t001	XP_034698472.1transcription factor bHLH162	174	1	5.2e-116	1	Vitis riparia/Vitis vinifera	1	3	GO:0003700;GO:0006357;GO:0046983		noIPR;IPR011598;IPR011598;IPR036638;noIPR;noIPR;IPR015660;IPR011598;IPR036638	;GO:0046983;GO:0046983;GO:0046983;;;GO:0003700/GO:0006357;GO:0046983;GO:0046983
Vitvi10g02255_t001	XP_002264089.2 eukaryotic translation initiation factor 3 subunit D-like	529	2	0	0.9971	Vitis vinifera	1	7	GO:0001732;GO:0002191;GO:0003743;GO:0005852;GO:0016282;GO:0033290;GO:0098808		noIPR;IPR007783;IPR007783;noIPR;noIPR;noIPR;noIPR;IPR007783;IPR007783	;GO:0005852/GO:0005737/GO:0003743;GO:0005852/GO:0005737/GO:0003743;;;;;GO:0005852/GO:0005737/GO:0003743;GO:0005852/GO:0005737/GO:0003743
Vitvi10g02256_t001	RVW95870.1Non-classical arabinogalactan protein 30	284	3	4.3e-109	0.8878	Vitis vinifera	0.8944				noIPR;noIPR;noIPR;noIPR;noIPR;noIPR	;;;;;
Vitvi10g02257_t001	XP_034696924.1VQ motif-containing protein 4	235	2	3.4e-151	1	Vitis riparia/Vitis vinifera	1				IPR008889;noIPR;noIPR;noIPR;noIPR;noIPR;IPR039611;IPR039827	;;;;;;;
Vitvi10g02258_t001	RVW37947.1Protein RALF-like 19	128	3	3.1e-88	0.9948	Vitis vinifera	1	1	GO:0005576		IPR008801;noIPR;noIPR	;;
Vitvi10g04324_t001	CAN78121.1hypothetical protein VITISV_041546	1021	1	0	0.8325	Vitis vinifera	0.8325	7	GO:0000184;GO:0000932;GO:0005515;GO:0005634;GO:0031347;GO:0060548;GO:0090306		IPR018834;IPR019458;IPR011990;IPR045153;noIPR;IPR011990	;;GO:0005515;;;GO:0005515
Vitvi10g04324_t002	CAN78121.1hypothetical protein VITISV_041546	1021	1	0	0.8325	Vitis vinifera	0.8325	7	GO:0000184;GO:0000932;GO:0005515;GO:0005634;GO:0031347;GO:0060548;GO:0090306		IPR018834;IPR019458;IPR011990;IPR045153;noIPR;IPR011990	;;GO:0005515;;;GO:0005515
Vitvi10g04324_t003	CAN78121.1hypothetical protein VITISV_041546	1021	1	0	0.8325	Vitis vinifera	0.8325	7	GO:0000184;GO:0000932;GO:0005515;GO:0005634;GO:0031347;GO:0060548;GO:0090306		IPR018834;IPR019458;IPR011990;IPR045153;noIPR;IPR011990	;;GO:0005515;;;GO:0005515
Vitvi10g04325_t001	XP_034697082.1uncharacterized protein LOC117922954	110	1	5.2e-65	1	Vitis riparia	1
Vitvi10g04326_t001	XP_010647372.1 transcriptional corepressor LEUNIG_HOMOLOG	823	1	0	0.9781	Vitis vinifera	0.9781	2	GO:0003714;GO:0005515		IPR001680;IPR001680;IPR015943;IPR015943;noIPR;noIPR;noIPR;IPR044716;IPR019775;noIPR;noIPR;IPR006594;IPR001680;IPR001680;IPR001680;noIPR;noIPR;IPR001680;noIPR;IPR036322	GO:0005515;GO:0005515;GO:0005515;GO:0005515;;;;GO:0003714;;;;GO:0005515;GO:0005515;GO:0005515;GO:0005515;;;GO:0005515;;GO:0005515
Vitvi10g01767_t001	XP_010647373.1 30S ribosomal protein S5, chloroplastic-like	340	3	4.8e-218	0.9957	Vitis vinifera	1	4	GO:0003723;GO:0003735;GO:0006412;GO:0015935		IPR005712;IPR005324;IPR014721;IPR013810;noIPR;IPR000851;noIPR;IPR018192;IPR005712;IPR013810;noIPR;IPR020568	GO:0006412/GO:0003735/GO:0015935;GO:0006412/GO:0005840/GO:0003735;;GO:0005840/GO:0006412/GO:0003723/GO:0003735;;GO:0006412/GO:0005840/GO:0003735;;;GO:0006412/GO:0003735/GO:0015935;GO:0005840/GO:0006412/GO:0003723/GO:0003735;;
Vitvi10g00478_t001	XP_010655439.1 ABA-inducible protein PHV A1	270	3	6.7e-38	0.9951	Vitis vinifera	1				noIPR;noIPR;noIPR;noIPR;noIPR;noIPR;noIPR;noIPR;noIPR;noIPR;noIPR;noIPR	;;;;;;;;;;;
Vitvi10g04327_t001	---NA---	112
Vitvi10g00479_t001	XP_002274050.1 dof zinc finger protein DOF5.7	299	3	7.2e-210	0.9955	Vitis vinifera	1	3	GO:0003677;GO:0005634;GO:0006355		IPR003851;noIPR;noIPR;noIPR;noIPR;noIPR;noIPR;IPR003851;IPR003851	GO:0003677/GO:0006355;;;;;;;GO:0003677/GO:0006355;GO:0003677/GO:0006355
Vitvi10g00480_t001	XP_003633022.2 dof zinc finger protein DOF1.4	337	3	1.9e-247	0.993	Vitis vinifera	1	3	GO:0003677;GO:0005634;GO:0006355		IPR003851;noIPR;noIPR;noIPR;IPR003851;IPR003851	GO:0003677/GO:0006355;;;;GO:0003677/GO:0006355;GO:0003677/GO:0006355
Vitvi10g04328_t001	XP_002280052.1 squamosa promoter-binding protein 1 isoform X2	140	3	3.2e-71	0.971	Vitis vinifera	1	6	GO:0003677;GO:0003700;GO:0005634;GO:0006355;GO:0009908;GO:0046872		IPR036893;IPR004333;IPR017238;noIPR;noIPR;noIPR;noIPR;noIPR;IPR044817;IPR004333;IPR036893	GO:0005634/GO:0003677;GO:0003677;GO:0003700/GO:0003677/GO:0009908;;;;;;GO:0003677;GO:0003677;GO:0005634/GO:0003677
Vitvi10g04328_t002	XP_010655440.1 squamosa promoter-binding protein 1 isoform X1	151	2	7.6e-82	0.9934	Vitis vinifera	1	4	GO:0003677;GO:0003700;GO:0005634;GO:0009908		IPR036893;IPR017238;IPR004333;noIPR;noIPR;noIPR;noIPR;noIPR;IPR044817;IPR004333;IPR036893	GO:0005634/GO:0003677;GO:0003700/GO:0003677/GO:0009908;GO:0003677;;;;;;GO:0003677;GO:0003677;GO:0005634/GO:0003677
Vitvi10g00482_t001	XP_002280023.1 mitochondrial arginine transporter BAC1 isoform X1	303	2	1.2e-217	0.9934	Vitis vinifera	1	3	GO:0000064;GO:0016021;GO:1990575	EC:7	IPR023395;IPR023395;IPR018108;noIPR;noIPR;IPR018108;IPR018108;IPR018108;IPR023395	;;;;;;;;
Vitvi10g00483_t001	XP_010655443.1 glyoxysomal processing protease, glyoxysomal isoform X1	759	3	0	0.948	Vitis vinifera	1	3	GO:0004252;GO:0005777;GO:0016485	EC:3.4.21	noIPR;IPR043504;noIPR;IPR039245;IPR009003;IPR009003	;;;GO:0005777/GO:0016485/GO:0004252;;
Vitvi10g00484_t001	XP_010655447.1 putative E3 ubiquitin-protein ligase RING1a isoform X4	433	5	4.6e-308	0.9878	Vitis vinifera	1				IPR001841;noIPR;IPR013083;noIPR;noIPR;noIPR;noIPR;noIPR;IPR044592;IPR017907;IPR001841;noIPR;noIPR	;;;;;;;;;;;;
Vitvi10g00485_t001	XP_002279836.1 auxin-repressed 12.5 kDa protein isoform X1	121	2	1.9e-72	0.9959	Companilactobacillus huachuanensis/Vitis vinifera	1				IPR008406;noIPR;noIPR;IPR008406	;;;
Vitvi10g00485_t002	RVW95802.1Dormancy-associated protein 1	108	5	1.5e-59	0.9981	Vitis vinifera	1				IPR008406;noIPR;noIPR;noIPR;noIPR;IPR008406	;;;;;
Vitvi10g00485_t003	RVW37966.1Dormancy-associated protein 1	122	1	8.8e-74	1	Vitis vinifera	1				IPR008406;noIPR;noIPR;IPR008406	;;;
Vitvi10g04329_t001	PON37866.1hypothetical protein PanWU01x14_316870	177	3	3.7e-29	0.5665	Parasponia andersonii	0.5778				noIPR;noIPR;noIPR;noIPR	;;;
Vitvi10g00486_t001	XP_010655449.1 protein FRIGIDA-ESSENTIAL 1	745	7	0	0.9903	Vitis vinifera	1	2	GO:0003677;GO:0046872		IPR032297;noIPR;noIPR;noIPR;noIPR;noIPR;noIPR;noIPR;noIPR;IPR000571;IPR036855	;;;;;;;;;GO:0046872;GO:0046872
Vitvi10g00487_t001	XP_002279791.2 putative leucine-rich repeat receptor-like serine/threonine-protein kinase At2g14440	624	2	0	0.9968	Vitis vinifera	1	4	GO:0005515;GO:0005768;GO:0005802;GO:0016021		IPR024788;IPR032675;noIPR;IPR001611;noIPR;noIPR;noIPR;noIPR	;;;GO:0005515;;;;
Vitvi10g00488_t001	XP_002279760.1 ethylene-responsive transcription factor 12	152	2	5.7e-107	1	Vitis vinifera	1	4	GO:0003677;GO:0003700;GO:0005634;GO:0006355		IPR001471;IPR001471;IPR001471;IPR036955;noIPR;noIPR;IPR001471;IPR001471;IPR016177	GO:0003700/GO:0006355;GO:0003700/GO:0006355;GO:0003700/GO:0006355;GO:0003700/GO:0006355;;;GO:0003700/GO:0006355;GO:0003700/GO:0006355;GO:0003677
Vitvi10g04330_t001	CAN74091.1hypothetical protein VITISV_023704	165	1	4.5e-117	0.9877	Vitis vinifera	0.9877
Vitvi10g01594_t001	XP_002279692.1 ethylene-responsive transcription factor 4	249	4	1.9e-155	0.9769	Vitis vinifera/Vitis riparia	1	4	GO:0003677;GO:0003700;GO:0005634;GO:0006355		IPR001471;IPR001471;IPR001471;IPR036955;noIPR;noIPR;noIPR;IPR001471;IPR001471;IPR016177	GO:0003700/GO:0006355;GO:0003700/GO:0006355;GO:0003700/GO:0006355;GO:0003700/GO:0006355;;;;GO:0003700/GO:0006355;GO:0003700/GO:0006355;GO:0003677
Vitvi10g04331_t001	CAN74094.1hypothetical protein VITISV_023707	199	1	1.4e-130	0.9639	Vitis vinifera	0.9639	3	GO:0006952;GO:0012501;GO:2000031
Vitvi10g00489_t001	XP_002273740.2 MACPF domain-containing protein NSL1	612	3	0	0.9989	Vitis vinifera	1	3	GO:0005886;GO:0009626;GO:2000031		IPR020864;IPR020864;noIPR;IPR044663;IPR020864	;;;GO:0012501/GO:0006952/GO:2000031;
Vitvi10g00490_t001	XP_002273710.2 pentatricopeptide repeat-containing protein At5g04780	933	3	0	0.9882	Vitis vinifera	1	2	GO:0005515;GO:0008270		IPR002885;IPR011990;IPR032867;IPR002885;IPR011990;IPR011990;IPR002885;noIPR;noIPR;noIPR;noIPR;IPR002885;IPR002885;IPR002885;IPR002885;IPR002885;IPR002885;IPR002885	;GO:0005515;GO:0008270;;GO:0005515;GO:0005515;;;;;;;;;;;;
Vitvi10g04332_t001	CBI30602.3unnamed protein product, partial	125	1	1.1e-66	1	Vitis vinifera	1
Vitvi10g04333_t001	CAN74096.1hypothetical protein VITISV_023709	170	1	1.1e-122	0.9824	Vitis vinifera	0.9824
Vitvi10g00491_t001	XP_002279435.1 protein DEHYDRATION-INDUCED 19 homolog 4 isoform X1	231	2	3.3e-156	0.9892	Vitis vinifera	0.9913				IPR008598;IPR027935;noIPR;IPR033347	;;;
Vitvi10g00492_t001	XP_002279414.1PREDICTED: uncharacterized protein At4g28440	149	3	2.3e-100	0.9955	Vitis vinifera	1				noIPR;noIPR;noIPR;noIPR;noIPR;noIPR;IPR012340	;;;;;;
Vitvi10g01769_t001	XP_002279363.2 protein NUCLEAR FUSION DEFECTIVE 6, chloroplastic/mitochondrial isoform X4	93	5	5.9e-54	1	Vitis vinifera/Vitis riparia	1	1	GO:0005739		IPR043459;noIPR	;
Vitvi10g01769_t002	XP_010655453.1 protein NUCLEAR FUSION DEFECTIVE 6, chloroplastic/mitochondrial isoform X2	97	1	1.2e-57	1	Vitis vinifera/Vitis riparia	1				IPR043459;noIPR	;
Vitvi10g01769_t003	XP_010655453.1 protein NUCLEAR FUSION DEFECTIVE 6, chloroplastic/mitochondrial isoform X2	97	1	1.2e-57	1	Vitis vinifera/Vitis riparia	1				IPR043459;noIPR	;
Vitvi10g01769_t004	XP_002279344.1 protein NUCLEAR FUSION DEFECTIVE 6, chloroplastic/mitochondrial isoform X3	97	2	7e-57	1	Vitis vinifera/Vitis riparia	1				noIPR;IPR043459	;
Vitvi10g01770_t001	XP_002279326.1PREDICTED: uncharacterized protein LOC100241906	142	3	6e-95	0.9977	Vitis vinifera	1				noIPR;IPR040344	;
Vitvi10g01771_t001	XP_002279294.1 protein E6	253	3	1.4e-145	0.9842	Vitis vinifera	1				noIPR;noIPR;noIPR;IPR040290	;;;
Vitvi10g04334_t001	CAN60307.1hypothetical protein VITISV_005069	101	1	5.5e-63	1	Vitis vinifera	1	1	GO:0016021		noIPR;noIPR	;
Vitvi10g01772_t001	XP_003633019.2PREDICTED: uncharacterized protein LOC100853536 isoform X1	296	5	1.2e-204	0.9771	Vitis vinifera	1	1	GO:0016021		noIPR;noIPR;noIPR;noIPR;noIPR;noIPR	;;;;;
Vitvi10g00494_t001	XP_010655454.1 glycogen phosphorylase 1 isoform X1	1000	3	0	0.9927	Vitis vinifera	1	6	GO:0005737;GO:0005980;GO:0008184;GO:0030170;GO:0102250;GO:0102499	EC:2.4.1.1	IPR011833;IPR000811;noIPR;IPR000811;noIPR;IPR000811;noIPR;IPR035090;IPR002912;noIPR;noIPR;noIPR	GO:0004645/GO:0005975/GO:0030170;GO:0008184/GO:0005975;;GO:0008184/GO:0005975;;GO:0008184/GO:0005975;;;;;;
Vitvi10g00496_t001	XP_003633023.1 dnaJ homolog subfamily B member 13	342	4	1.4e-249	0.9524	Vitis vinifera	1	4	GO:0005829;GO:0051082;GO:0051085;GO:0051087		IPR001623;IPR001623;IPR036869;IPR001623;IPR002939;noIPR;noIPR;noIPR;noIPR;IPR018253;IPR001623;IPR001623;noIPR;IPR008971;IPR008971;IPR036869	;;;;;;;;;;;;;GO:0051082/GO:0006457;GO:0051082/GO:0006457;
Vitvi10g00496_t002	RVW38007.1DnaJ-like subfamily B member 13	243	4	4.6e-171	0.9979	Vitis vinifera	1	4	GO:0005829;GO:0051082;GO:0051085;GO:0051087		noIPR;IPR002939;noIPR;noIPR;noIPR;noIPR;IPR008971;IPR008971	;;;;;;GO:0051082/GO:0006457;GO:0051082/GO:0006457
Vitvi10g00497_t001	XP_010655456.1 homeobox-DDT domain protein RLT1 isoform X1	1748	6	0	0.9916	Vitis vinifera	1	2	GO:0003677;GO:0006357		noIPR;noIPR;IPR001356;IPR018501;IPR028942;IPR018501;IPR007759;IPR001356;noIPR;IPR028941;noIPR;noIPR;noIPR;noIPR;noIPR;noIPR;noIPR;noIPR;noIPR;noIPR;noIPR;noIPR;noIPR;IPR044977;IPR018501;IPR007759;IPR001356;IPR001356;IPR009057	;;GO:0003677;;;;GO:0006355;GO:0003677;;;;;;;;;;;;;;;;GO:0006357;;GO:0006355;GO:0003677;GO:0003677;
Vitvi10g00497_t002	XP_002273559.3 homeobox-DDT domain protein RLT1 isoform X2	1747	6	0	0.992	Vitis vinifera	1	2	GO:0003677;GO:0006357		noIPR;noIPR;IPR001356;IPR018501;IPR028941;IPR007759;IPR001356;IPR018501;noIPR;IPR028942;noIPR;noIPR;noIPR;noIPR;noIPR;noIPR;noIPR;noIPR;noIPR;noIPR;noIPR;noIPR;noIPR;noIPR;IPR044977;IPR007759;IPR018501;IPR001356;IPR001356;IPR009057	;;GO:0003677;;;GO:0006355;GO:0003677;;;;;;;;;;;;;;;;;;GO:0006357;GO:0006355;;GO:0003677;GO:0003677;
Vitvi10g00497_t003	XP_010655456.1 homeobox-DDT domain protein RLT1 isoform X1	1408	12	0	0.9926	Vitis vinifera	0.9993	2	GO:0003677;GO:0006357		noIPR;noIPR;IPR001356;IPR018501;IPR001356;IPR018501;noIPR;IPR028942;IPR028941;IPR007759;noIPR;noIPR;noIPR;noIPR;noIPR;noIPR;IPR044977;IPR018501;IPR007759;IPR001356;IPR001356;IPR009057	;;GO:0003677;;GO:0003677;;;;;GO:0006355;;;;;;;GO:0006357;;GO:0006355;GO:0003677;GO:0003677;
Vitvi10g00499_t001	XP_002278829.1 triose phosphate/phosphate translocator, chloroplastic	406	3	4.2e-288	0.9992	Vitis vinifera	1	5	GO:0005794;GO:0015297;GO:0016021;GO:0031969;GO:0055085	EC:7	noIPR;IPR004853;IPR004696;noIPR;noIPR;noIPR	;;GO:0016021/GO:0055085/GO:0022857;;;
Vitvi10g00499_t002	XP_002278829.1 triose phosphate/phosphate translocator, chloroplastic	297	20	5.3e-205	0.9828	Vitis vinifera	1	5	GO:0005794;GO:0015297;GO:0016021;GO:0031969;GO:0055085	EC:7	IPR004853;IPR004696;noIPR;noIPR;noIPR;noIPR	;GO:0016021/GO:0055085/GO:0022857;;;;
Vitvi10g00499_t003	XP_002278829.1 triose phosphate/phosphate translocator, chloroplastic	406	3	4.2e-288	0.9992	Vitis vinifera	1	5	GO:0005794;GO:0015297;GO:0016021;GO:0031969;GO:0055085	EC:7	noIPR;IPR004853;IPR004696;noIPR;noIPR;noIPR	;;GO:0016021/GO:0055085/GO:0022857;;;
Vitvi10g00501_t002	RVW38013.1Protein DMP6	211	5	5.4e-152	0.9905	Vitis vinifera	1	1	GO:0016021		IPR007770;noIPR;IPR007770	;;
Vitvi10g00500_t001	CBI30613.3unnamed protein product, partial	73	1	1.1e-42	1	Vitis vinifera	1	1	GO:0016021
Vitvi10g00501_t001	RVW38013.1Protein DMP6	211	5	5.4e-152	0.9905	Vitis vinifera	1	1	GO:0016021		IPR007770;noIPR;IPR007770	;;
Vitvi10g00503_t001	XP_002278698.1 receptor-like protein kinase HSL1	989	3	0	0.9414	Vitis vinifera	1	6	GO:0004672;GO:0005515;GO:0005524;GO:0005886;GO:0006468;GO:0016021	EC:2.7.1	IPR003591;IPR000719;IPR032675;noIPR;IPR001611;noIPR;IPR032675;IPR013210;IPR000719;IPR032675;noIPR;noIPR;noIPR;noIPR;noIPR;noIPR;noIPR;IPR008271;IPR017441;IPR000719;noIPR;IPR011009;noIPR	;GO:0005524/GO:0004672/GO:0006468;;;GO:0005515;;;;GO:0005524/GO:0004672/GO:0006468;;;;;;;;;GO:0004672/GO:0006468;GO:0005524;GO:0005524/GO:0004672/GO:0006468;;;
Vitvi10g00504_t001	RVW95843.1Serine/threonine-protein kinase-like protein ACR4	332	5	1.3e-235	0.997	Vitis vinifera	1	7	GO:0003677;GO:0004672;GO:0005524;GO:0005886;GO:0006355;GO:0006468;GO:0016021	EC:2.7.1	noIPR;noIPR;IPR001245;noIPR;noIPR;noIPR;noIPR;noIPR;IPR000719;IPR011009	;;GO:0004672/GO:0006468;;;;;;GO:0005524/GO:0004672/GO:0006468;
Vitvi10g00505_t001	XP_002278661.1 NAC domain-containing protein 73 isoform X2	312	4	5.6e-234	1	Vitis vinifera/Vitis riparia	1	7	GO:0003677;GO:0003700;GO:0004672;GO:0005524;GO:0006355;GO:0006468;GO:0016021	EC:2.7.1	IPR036093;IPR003441;noIPR;IPR044799;IPR003441;IPR036093	GO:0003677/GO:0006355;GO:0003677/GO:0006355;;GO:0003700;GO:0003677/GO:0006355;GO:0003677/GO:0006355
Vitvi10g00506_t001	XP_010655463.1 guanylate-binding protein 2	1067	2	0	0.9958	Vitis vinifera	1	2	GO:0003924;GO:0005525	EC:3.6.1	noIPR;noIPR;noIPR;noIPR;noIPR;noIPR;IPR003191;IPR015894;noIPR;IPR027417;noIPR;noIPR;noIPR;noIPR;IPR030386;noIPR;IPR036543;IPR027417	;;;;;;GO:0005525/GO:0003924;GO:0005525/GO:0003924;;;;;;;GO:0005525;;GO:0005525/GO:0003924;
Vitvi10g00507_t001	XP_011001235.1 NAC domain-containing protein 72-like	102	12	2.4e-13	0.5319	Populus deltoides	0.551	2	GO:0003677;GO:0006355		noIPR;noIPR;noIPR;noIPR;IPR036093	;;;;GO:0003677/GO:0006355
Vitvi10g01773_t001	RVW95881.1Homeobox-leucine zipper protein ATHB-52	216	1	6.6e-151	1	Vitis vinifera	1	4	GO:0000981;GO:0003677;GO:0005634;GO:0006357		noIPR;IPR000047;IPR001356;IPR001356;noIPR;noIPR;noIPR;IPR017970;IPR001356;IPR001356;IPR009057	;GO:0003677;GO:0003677;GO:0003677;;;;GO:0000981/GO:0006355;GO:0003677;GO:0003677;
Vitvi10g00508_t001	XP_002278515.1 glutaredoxin-C9	150	4	1.1e-103	0.9967	Vitis vinifera	1	2	GO:0005737;GO:0097573	EC:1.8	IPR011905;IPR002109;noIPR;noIPR;noIPR;noIPR;IPR011905;noIPR;noIPR;IPR036249	;GO:0097573;;;;;;;;
Vitvi10g00509_t001	NP_001267908.1MLO-like protein 6-like	510	6	0	0.9869	Vitis vinifera	1	4	GO:0005516;GO:0006952;GO:0009607;GO:0016021		IPR004326;noIPR;IPR004326	GO:0016021/GO:0006952;;GO:0016021/GO:0006952
Vitvi10g00510_t001	XP_010655464.1 auxin response factor 3	739	2	0	0.9946	Vitis vinifera	1	4	GO:0003677;GO:0005634;GO:0006355;GO:0009725		IPR003340;noIPR;IPR003340;IPR010525;IPR015300;noIPR;IPR044835;IPR003340;IPR003340;IPR015300	GO:0003677;;GO:0003677;GO:0009725/GO:0005634/GO:0003677/GO:0006355;;;GO:0009725/GO:0003677/GO:0006355;GO:0003677;GO:0003677;
Vitvi10g00510_t002	XP_010655464.1 auxin response factor 3	740	2	0	0.9932	Vitis vinifera	0.9986	4	GO:0003677;GO:0005634;GO:0006355;GO:0009725		IPR003340;noIPR;IPR003340;IPR010525;IPR015300;IPR044835;noIPR;IPR003340;IPR003340;IPR015300	GO:0003677;;GO:0003677;GO:0009725/GO:0005634/GO:0003677/GO:0006355;;GO:0009725/GO:0003677/GO:0006355;;GO:0003677;GO:0003677;
Vitvi10g00511_t001	CBI30624.3unnamed protein product, partial	378	1	1.6e-238	0.8651	Vitis vinifera	0.8651	1	GO:0008171	EC:2.1.1	IPR001077;noIPR;IPR006747;noIPR;noIPR;IPR016461;IPR029063	GO:0008171;;;;;GO:0008168;
Vitvi10g01775_t001	XP_002278208.3 trans-resveratrol di-O-methyltransferase isoform X1	369	3	5.6e-251	0.9526	Vitis vinifera	1	3	GO:0008171;GO:0032259;GO:0046983	EC:2.1.1	IPR016461;noIPR;IPR036388;IPR012967;IPR001077;noIPR;noIPR;IPR016461;IPR016461;noIPR;IPR029063;IPR036390	GO:0008168;;;GO:0046983;GO:0008171;;;GO:0008168;GO:0008168;;;
Vitvi10g01777_t001	XP_002278208.3 trans-resveratrol di-O-methyltransferase isoform X1	358	3	7.8e-246	0.9461	Vitis vinifera	0.9916	3	GO:0008171;GO:0032259;GO:0046983	EC:2.1.1	IPR016461;IPR012967;IPR001077;IPR036388;noIPR;noIPR;IPR016461;noIPR;IPR016461;noIPR;IPR036390;IPR029063	GO:0008168;GO:0046983;GO:0008171;;;;GO:0008168;;GO:0008168;;;
Vitvi10g01778_t001	XP_002278127.1 trans-resveratrol di-O-methyltransferase	354	3	1.7e-263	0.9906	Vitis vinifera	1	5	GO:0008171;GO:0008757;GO:0019438;GO:0032259;GO:0046983	EC:2.1.1	IPR012967;noIPR;IPR036388;IPR016461;IPR001077;noIPR;noIPR;IPR016461;IPR016461;noIPR;IPR036390;IPR029063	GO:0046983;;;GO:0008168;GO:0008171;;;GO:0008168;GO:0008168;;;
Vitvi10g01779_t001	XP_002278092.1 trans-resveratrol di-O-methyltransferase	361	3	2.3e-269	0.9972	Vitis vinifera	1	3	GO:0008171;GO:0032259;GO:0046983	EC:2.1.1	noIPR;IPR036388;IPR001077;IPR016461;IPR012967;noIPR;noIPR;IPR016461;IPR016461;IPR029063;IPR036390	;;GO:0008171;GO:0008168;GO:0046983;;;GO:0008168;GO:0008168;;
Vitvi10g00514_t001	XP_002273293.1 OPA3-like protein	168	1	3.7e-104	1	Vitis vinifera/Vitis riparia	1	2	GO:0005739;GO:0019216		noIPR;IPR010754;noIPR;IPR010754	;;;
Vitvi10g00515_t001	XP_002273268.1 transcription factor VOZ1	485	3	0	0.9979	Vitis vinifera	1	8	GO:0005634;GO:0009408;GO:0009414;GO:0009631;GO:0009651;GO:0043565;GO:0045893;GO:0048578		noIPR;noIPR;noIPR;IPR039277;noIPR	;;;GO:0048578/GO:0006355;
Vitvi10g04335_t001	CBI30630.3unnamed protein product, partial	135	1	1e-79	1	Vitis vinifera	1				IPR007808;IPR038567;IPR007808;noIPR	;;;
Vitvi10g04335_t002	XP_010655470.1 transcription elongation factor 1 homolog isoform X2	121	3	4.5e-52	1	Vitis vinifera	1				IPR038567;IPR007808;noIPR;IPR007808;noIPR	;;;;
Vitvi10g00517_t001	XP_002273236.2PREDICTED: uncharacterized protein LOC100248663 isoform X2	624	4	0	0.996	Vitis vinifera	1	5	GO:0009507;GO:0010027;GO:0016021;GO:0090391;GO:1903866		noIPR
Vitvi10g00517_t002	XP_010655471.1PREDICTED: uncharacterized protein LOC100248663 isoform X1	625	4	0	0.996	Vitis vinifera	1	5	GO:0009507;GO:0010027;GO:0016021;GO:0090391;GO:1903866		noIPR
Vitvi10g00518_t001	XP_002277729.1 28 kDa heat- and acid-stable phosphoprotein	156	1	1.1e-72	1	Vitis vinifera/Vitis riparia	1	1	GO:0005829		noIPR;noIPR;IPR019380;noIPR;noIPR;IPR039876;noIPR	;;;;;;
Vitvi10g01780_t001	XP_002277640.3PREDICTED: uncharacterized protein LOC100253757	99	1	9.5e-42	1	Vitis vinifera/Vitis riparia	1	1	GO:0016021		noIPR;noIPR;noIPR	;;
Vitvi10g01781_t001	XP_002277579.1 ras-related protein RABA1f	217	20	1.4e-150	0.9903	Vitis vinifera	1	3	GO:0003924;GO:0005525;GO:0005768	EC:3.6.1	noIPR;noIPR;noIPR;IPR001806;noIPR;IPR005225;IPR001806;IPR027417;noIPR;noIPR;IPR001806;noIPR;noIPR;noIPR;IPR027417	;;;GO:0005525/GO:0003924;;GO:0005525;GO:0005525/GO:0003924;;;;GO:0005525/GO:0003924;;;;
Vitvi10g00519_t001	XP_002273188.1 WUSCHEL-related homeobox 9	379	4	1.3e-243	0.9908	Vitis vinifera	1	6	GO:0003677;GO:0003700;GO:0005634;GO:0006355;GO:0007275;GO:0050793		IPR001356;noIPR;IPR001356;noIPR;noIPR;noIPR;IPR044557;noIPR;IPR001356;IPR001356;IPR009057	GO:0003677;;GO:0003677;;;;GO:0003700/GO:0050793;;GO:0003677;GO:0003677;
Vitvi10g00520_t001	XP_002277471.1 rac-like GTP-binding protein RAC13	197	4	5.9e-140	0.9757	Vitis vinifera	1	3	GO:0003924;GO:0005525;GO:0007264	EC:3.6.1	noIPR;noIPR;IPR001806;noIPR;IPR027417;IPR005225;IPR001806;IPR003578;noIPR;noIPR;noIPR;IPR001806;noIPR;IPR027417	;;GO:0005525/GO:0003924;;;GO:0005525;GO:0005525/GO:0003924;GO:0007264/GO:0005525;;;;GO:0005525/GO:0003924;;
Vitvi10g00521_t001	XP_010655476.1 pathogenesis-related genes transcriptional activator PTI5	153	4	3.1e-100	0.9868	Vitis vinifera	1	5	GO:0003677;GO:0003700;GO:0005634;GO:0006355;GO:0009873		IPR001471;IPR001471;IPR001471;IPR036955;noIPR;IPR044808;noIPR;IPR001471;IPR001471;IPR016177	GO:0003700/GO:0006355;GO:0003700/GO:0006355;GO:0003700/GO:0006355;GO:0003700/GO:0006355;;GO:0003700/GO:0009873;;GO:0003700/GO:0006355;GO:0003700/GO:0006355;GO:0003677
Vitvi10g00522_t001	XP_002273121.1 ethylene-responsive transcription factor ERF091	277	3	6.8e-197	0.9916	Vitis vinifera	1	4	GO:0003677;GO:0003700;GO:0005634;GO:0006355		IPR001471;IPR001471;IPR001471;IPR036955;noIPR;noIPR;noIPR;noIPR;IPR001471;IPR001471;IPR016177	GO:0003700/GO:0006355;GO:0003700/GO:0006355;GO:0003700/GO:0006355;GO:0003700/GO:0006355;;;;;GO:0003700/GO:0006355;GO:0003700/GO:0006355;GO:0003677
Vitvi10g04336_t001	---NA---	54
Vitvi10g00523_t001	XP_002273045.2 GDSL esterase/lipase At5g45960	372	4	1.3e-276	0.9807	Vitis vinifera	1	1	GO:0016788	EC:3.1	IPR001087;IPR036514;noIPR;noIPR;IPR035669;noIPR	GO:0016788;;;;;
Vitvi10g00524_t001	XP_002277279.1 GDSL esterase/lipase At5g45950	359	4	2.8e-260	0.9931	Vitis vinifera	1	1	GO:0016788	EC:3.1	IPR001087;IPR036514;noIPR;noIPR;IPR035669;noIPR	GO:0016788;;;;;
Vitvi10g00525_t001	XP_034712127.1negative regulator of systemic acquired resistance SNI1	474	2	0	0.9958	Vitis vinifera	1	10	GO:0000976;GO:0002215;GO:0005634;GO:0006974;GO:0010113;GO:0016444;GO:0030915;GO:0043966;GO:0045892;GO:0051572		IPR034561	GO:0045892/GO:0006974/GO:0005634/GO:0031348/GO:0030915
Vitvi10g00525_t002	XP_034712127.1negative regulator of systemic acquired resistance SNI1	424	2	2.4e-297	0.9952	Vitis vinifera	1	10	GO:0000976;GO:0002215;GO:0005634;GO:0006974;GO:0010113;GO:0016444;GO:0030915;GO:0043966;GO:0045892;GO:0051572		IPR034561	GO:0045892/GO:0006974/GO:0005634/GO:0031348/GO:0030915
Vitvi10g00526_t001	XP_010655480.1 D-tyrosyl-tRNA(Tyr) deacylase	191	2	7.8e-133	1	Vitis vinifera	1	4	GO:0000049;GO:0005737;GO:0051500;GO:0106074	EC:3.1.1.96;EC:3.1.1.1	IPR023509;IPR003732;IPR003732;noIPR;noIPR;IPR003732;IPR003732;IPR003732;IPR023509	;GO:0002161/GO:0005737/GO:0051499;GO:0002161/GO:0005737/GO:0051499;;;GO:0002161/GO:0005737/GO:0051499;GO:0002161/GO:0005737/GO:0051499;GO:0002161/GO:0005737/GO:0051499;
Vitvi10g00527_t001	XP_002272881.1 peroxidase 19	349	4	1.7e-242	0.9718	Vitis vinifera	1	9	GO:0004601;GO:0005576;GO:0006979;GO:0009505;GO:0009506;GO:0020037;GO:0042744;GO:0046872;GO:0098869	EC:1.11.1	IPR002016;IPR000823;IPR002016;noIPR;noIPR;noIPR;noIPR;noIPR;noIPR;IPR019794;IPR019793;IPR002016;IPR033905;IPR010255	GO:0020037/GO:0004601/GO:0006979;GO:0020037/GO:0004601/GO:0006979;GO:0020037/GO:0004601/GO:0006979;;;;;;;GO:0004601;;GO:0020037/GO:0004601/GO:0006979;GO:0004601/GO:0042744;GO:0020037/GO:0004601/GO:0006979
Vitvi10g04337_t001	RVW95811.1hypothetical protein CK203_025702	114	1	1e-75	0.9649	Vitis vinifera	0.9649
Vitvi10g00528_t001	XP_002272818.1 ATP synthase mitochondrial F1 complex assembly factor 1	245	2	1e-175	0.9939	Vitis vinifera	1	2	GO:0005739;GO:0033615		IPR010591;noIPR;IPR010591	GO:0065003/GO:0005739;;GO:0065003/GO:0005739
Vitvi10g00529_t001	XP_002272702.2 apoptosis inhibitor 5-like protein API5 isoform X1	550	2	0	0.9991	Vitis vinifera/Vitis riparia	1	3	GO:0003729;GO:0005634;GO:0043067		IPR011989;IPR008383;noIPR;noIPR;IPR008383;IPR016024	;;;;;
Vitvi10g04338_t001	RVW79141.1Glutamate receptor 2.9	105	1	2.9e-47	0.9485	Vitis vinifera	0.9485	3	GO:0015276;GO:0016021;GO:0034220	EC:7	noIPR;noIPR;noIPR;noIPR;IPR028082	;;;;
Vitvi10g04339_t001	RVW95763.1hypothetical protein CK203_025685	224	1	2.6e-152	1	Vitis vinifera	1	1	GO:0016021		noIPR;IPR001828;noIPR;noIPR;noIPR;noIPR;IPR028082	;;;;;;
Vitvi10g00531_t001	EMS47738.1Protein transport protein Sec61 subunit alpha	113	20	1.2e-36	0.7964	Punica granatum	0.8	11	GO:0005048;GO:0005784;GO:0006616;GO:0008270;GO:0008320;GO:0009535;GO:0016021;GO:0019284;GO:0031204;GO:0043022;GO:0046570	EC:4.2.1.109;EC:7	IPR023201;IPR002208;noIPR;IPR023201	;GO:0015031/GO:0016020;;
Vitvi10g01784_t001	CBI30647.3unnamed protein product, partial	64	1	2.8e-39	1	Vitis vinifera	1	3	GO:0003729;GO:0005634;GO:0043067		IPR008383;noIPR;IPR008383	;;
Vitvi10g04340_t001	CAN65541.1hypothetical protein VITISV_028909	177	1	5.9e-110	1	Vitis vinifera	1	3	GO:0015276;GO:0016021;GO:0034220	EC:7	noIPR;noIPR	;
Vitvi10g04341_t001	RVW79142.1Glutamate receptor 2.5	226	6	8.8e-139	0.9698	Vitis vinifera	0.9735	3	GO:0015276;GO:0016021;GO:0034220	EC:7	IPR001828;noIPR;noIPR;noIPR;IPR028082	;;;;
Vitvi10g04342_t001	XP_019078063.1 glutamate receptor 2.7-like	277	2	1.2e-171	0.992	Vitis vinifera	1	3	GO:0015276;GO:0016021;GO:0034220	EC:7	IPR001828;noIPR;noIPR;noIPR;IPR028082	;;;;
Vitvi10g04343_t001	CAN65342.1hypothetical protein VITISV_013834	101	1	3.8e-49	0.9892	Vitis vinifera	0.9892	3	GO:0015276;GO:0016021;GO:0034220	EC:7
Vitvi10g04344_t001	XP_034697416.1glutamate receptor 2.9-like	310	3	5.7e-199	0.9827	Vitis riparia	0.9902	3	GO:0015276;GO:0016021;GO:0034220	EC:7	noIPR;IPR001828;noIPR;noIPR;IPR028082	;;;;
Vitvi10g01787_t001	XP_002272216.1 glutamate receptor 2.7	916	5	0	0.9902	Vitis vinifera	1	5	GO:0005886;GO:0015276;GO:0016021;GO:0034220;GO:0038023	EC:7	IPR001320;IPR001638;noIPR;IPR001320;noIPR;noIPR;noIPR;IPR001828;IPR017103;noIPR;noIPR;noIPR;noIPR;noIPR;noIPR;noIPR;IPR044440;IPR028082;noIPR	GO:0015276/GO:0016020;;;GO:0015276/GO:0016020;;;;;;;;;;;;;;;
Vitvi10g00535_t001	XP_010655486.1PREDICTED: uncharacterized protein LOC104880483	627	3	0	0.9857	Vitis vinifera	1				noIPR;noIPR;noIPR;noIPR	;;;
Vitvi10g00536_t001	XP_010655487.1 probable pre-mRNA-splicing factor ATP-dependent RNA helicase DEAH9	694	3	0	0.9995	Vitis vinifera	1	4	GO:0003723;GO:0003724;GO:0005524;GO:0016787	EC:3.6.4.13	noIPR;IPR014001;IPR001650;IPR007502;IPR027417;IPR011709;IPR007502;noIPR;IPR027417;IPR001650;noIPR;noIPR;IPR002464;IPR014001;IPR001650;noIPR;noIPR;IPR027417	;;;GO:0004386;;;GO:0004386;;;;;;;;;;;
Vitvi10g00537_t001	RVW29664.1Sodium/calcium exchanger NCL2	559	3	0	0.9855	Vitis vinifera	1	3	GO:0005509;GO:0016021;GO:0055085		IPR002048;IPR004837;IPR002048;noIPR;noIPR;noIPR;IPR002048;IPR002048;IPR002048;IPR011992	GO:0005509;GO:0016021/GO:0055085;GO:0005509;;;;GO:0005509;GO:0005509;GO:0005509;
Vitvi10g04345_t001	CBI30652.3unnamed protein product, partial	165	5	1.7e-117	0.9952	Vitis vinifera	1	2	GO:0003700;GO:0006355		noIPR;IPR040356	;GO:0003700
Vitvi10g04346_t001	RVW79148.1hypothetical protein CK203_051310	265	1	2e-175	1	Vitis vinifera	1	3	GO:0003700;GO:0006355;GO:0016021		noIPR;noIPR;IPR040356	;;GO:0003700
Vitvi10g01788_t001	XP_002272067.1 E3 ubiquitin-protein ligase ATL41-like	218	2	1.3e-151	0.9977	Vitis vinifera	1	1	GO:0016021		IPR001841;IPR013083;IPR001841;noIPR;noIPR;noIPR;noIPR;IPR001841;noIPR;noIPR	;;;;;;;;;
Vitvi10g00539_t001	XP_002272018.1 protein IQ-DOMAIN 1	306	4	6e-217	0.9642	Vitis vinifera	1	1	GO:0005515		noIPR;noIPR;noIPR;noIPR;noIPR;noIPR;IPR000048	;;;;;;GO:0005515
Vitvi10g00540_t001	XP_010655491.1 transcription factor TCP4	327	4	6.5e-234	0.9433	Vitis vinifera	1	5	GO:0003700;GO:0005634;GO:0006355;GO:0043565;GO:2000032		IPR017887;IPR005333;noIPR;IPR005333;noIPR;IPR017887	;GO:0003700;;GO:0003700;;
Vitvi10g04347_t001	RVW29667.1Transcription factor TCP3	166	1	3.6e-80	0.8182	Vitis vinifera	0.8182	2	GO:0003700;GO:0006355
Vitvi10g00541_t001	XP_002276381.1 nudix hydrolase 15, mitochondrial	282	3	6.1e-198	0.9827	Vitis vinifera	1	1	GO:0010945	EC:3.6.1	noIPR;IPR000086;noIPR;noIPR;noIPR;IPR045121;IPR000086;IPR045121;IPR015797	;;;;;GO:0010945;;GO:0010945;
Vitvi10g00542_t001	XP_002276338.3 nudix hydrolase 15, mitochondrial	227	3	4e-154	0.9956	Vitis vinifera	1	1	GO:0010945	EC:3.6.1	noIPR;noIPR;IPR000086;noIPR;IPR045121;IPR000086;IPR045121;IPR015797	;;;;GO:0010945;;GO:0010945;
Vitvi10g00543_t001	XP_002276262.1 magnesium-chelatase subunit ChlI, chloroplastic	426	2	1.5e-298	0.9965	Vitis vinifera	1	5	GO:0005524;GO:0009570;GO:0015979;GO:0015995;GO:0016851	EC:6.6.1.1	noIPR;IPR003593;IPR027417;IPR011775;noIPR;IPR000523;IPR041628;noIPR;IPR045006;noIPR;IPR027417	;;;GO:0016851/GO:0005524/GO:0015995;;GO:0005524;;;;;
Vitvi10g00544_t001	XP_002271913.1 spermidine sinapoyl-CoA acyltransferase	446	2	0	0.9955	Vitis vinifera	1	2	GO:0009805;GO:0016410	EC:2.3.1	IPR023213;IPR003480;IPR023213;noIPR;noIPR	;GO:0016747;;;
Vitvi10g01789_t001	XP_019078001.1PREDICTED: uncharacterized protein At4g18490 isoform X1	879	4	0	0.9957	Vitis vinifera	1				noIPR;noIPR;noIPR;noIPR;noIPR;IPR038777	;;;;;
Vitvi10g04348_t001	PQQ03346.1hypothetical protein Pyn_29315	82	12	5.5e-11	0.5809	Prunus yedoensis var. nudiflora	0.6164				noIPR;noIPR;noIPR;IPR039616	;;;
Vitvi10g04349_t001	CAN66384.1hypothetical protein VITISV_015207	106	1	1.9e-65	0.9528	Vitis vinifera	0.9528
Vitvi10g04350_t001	DAD17770.1TPA_asm: hypothetical protein HUJ06_019233	80	1	3.4e-11	0.6053	Nelumbo nucifera	0.6053				noIPR;noIPR;IPR039616	;;
Vitvi10g04351_t001	CAN72292.1hypothetical protein VITISV_015310	284	1	1.5e-59	0.8188	Vitis vinifera	0.8188	2	GO:0006511;GO:0031625		noIPR;noIPR	;
Vitvi10g04352_t001	DAD17770.1TPA_asm: hypothetical protein HUJ06_019233	80	1	1.4e-10	0.6053	Nelumbo nucifera	0.6053				noIPR;noIPR;IPR039616	;;
Vitvi10g04353_t001	CAN66384.1hypothetical protein VITISV_015207	106	1	5.7e-67	0.9717	Vitis vinifera	0.9717
Vitvi10g04354_t001	CAN64364.1hypothetical protein VITISV_037930	253	1	9.1e-16	0.8364	Vitis vinifera	0.8364				noIPR
Vitvi10g04355_t001	CAN76807.1hypothetical protein VITISV_017596	276	1	8.4e-146	0.7993	Vitis vinifera	0.7993	1	GO:0017056		IPR044840	GO:0017056
Vitvi10g04356_t001	CAN77466.1hypothetical protein VITISV_006780	71	1	1e-33	1	Vitis vinifera	1
Vitvi10g04357_t001	CAN84071.1hypothetical protein VITISV_023825	81	1	1.8e-47	0.963	Vitis vinifera	0.963				noIPR;noIPR;IPR039616;noIPR	;;;
Vitvi10g00551_t001	XP_003632985.1 GDSL esterase/lipase At5g45920	237	2	1e-178	1	Vitis vinifera	1	1	GO:0016788	EC:3.1	IPR001087;IPR036514;IPR045136;noIPR;noIPR;noIPR	GO:0016788;;;;;
Vitvi10g00551_t002	XP_003632985.1 GDSL esterase/lipase At5g45920	237	2	1e-178	1	Vitis vinifera	1	1	GO:0016788	EC:3.1	IPR001087;IPR036514;IPR045136;noIPR;noIPR;noIPR	GO:0016788;;;;;
Vitvi10g00552_t001	XP_002267303.1 pentatricopeptide repeat-containing protein At1g28690, mitochondrial	533	1	0	1	Vitis vinifera	1	1	GO:0005515		IPR011990;IPR011990;IPR002885;IPR002885;IPR002885;IPR011990;noIPR;noIPR;noIPR;noIPR;IPR002885;IPR002885;IPR002885;IPR002885;IPR002885;IPR011990	GO:0005515;GO:0005515;;;;GO:0005515;;;;;;;;;;GO:0005515
Vitvi10g01790_t001	XP_034698451.1signaling peptide TAXIMIN 1-like	78	3	1e-43	1	Vitis vinifera	1	1	GO:0016021		noIPR;noIPR	;
Vitvi10g00553_t001	XP_002275486.1 pyruvate decarboxylase 1	577	2	0	0.9957	Vitis vinifera	1	4	GO:0000287;GO:0004737;GO:0005829;GO:0030976	EC:4.1.1.1	IPR012000;IPR011766;IPR012110;IPR012001;noIPR;noIPR;noIPR;noIPR;noIPR;IPR012110;noIPR;noIPR;IPR029061;IPR029061;IPR029035	GO:0000287/GO:0030976;GO:0003824/GO:0030976;GO:0016831;GO:0030976;;;;;;GO:0016831;;;;;
Vitvi10g00554_t001	XP_034698285.1malate dehydrogenase, mitochondrial	352	3	4e-245	0.9785	Vitis labrusca x Vitis vinifera/Vitis riparia/Vitis vinifera	1	4	GO:0005975;GO:0006099;GO:0006108;GO:0030060	EC:1.1.1.37	noIPR;IPR015955;IPR001236;IPR010097;IPR001557;IPR022383;noIPR;noIPR;noIPR;IPR001252;IPR010097;IPR036291;IPR015955	;GO:0003824/GO:0005975/GO:0016616;GO:0016491;GO:0030060/GO:0006099;GO:0019752/GO:0016616;GO:0016616;;;;GO:0006108/GO:0016615;GO:0030060/GO:0006099;;GO:0003824/GO:0005975/GO:0016616
Vitvi10g00555_t001	XP_002267261.1 GDSL esterase/lipase At1g28580	375	4	8.7e-288	0.9927	Vitis vinifera	1	1	GO:0016788	EC:3.1	noIPR;IPR036514;IPR001087;noIPR;noIPR;IPR035669;noIPR	;;GO:0016788;;;;
Vitvi10g00557_t001	XP_002267222.2 GDSL esterase/lipase At5g45910	364	2	1.7e-275	0.9986	Vitis vinifera	1	1	GO:0016788	EC:3.1	IPR036514;IPR001087;noIPR;noIPR;IPR035669;noIPR	;GO:0016788;;;;
Vitvi10g04358_t001	CAN64953.1hypothetical protein VITISV_042282	389	1	5.7e-272	0.9974	Vitis vinifera	0.9974	2	GO:0016021;GO:0016788	EC:3.1	noIPR;noIPR;IPR039261	;;
Vitvi10g00558_t001	XP_034697681.1adenylate-forming reductase 06235-like	552	3	0	0.9946	Vitis vinifera	1	2	GO:0005886;GO:0016021		noIPR;noIPR;IPR039261	;;
Vitvi10g00559_t001	XP_034697718.1adenylate-forming reductase 06235-like	552	3	0	0.9903	Vitis vinifera	1	1	GO:0016021		IPR039261;noIPR;noIPR;IPR039261	;;;
Vitvi10g00561_t001	XP_002266982.2 phospholipase A1-IIgamma isoform X1	406	3	2.7e-300	0.9975	Vitis vinifera	1	2	GO:0008970;GO:0016042	EC:3.1.1.32;EC:3.1.1.1	IPR002921;IPR029058;noIPR;noIPR;IPR033556;IPR033556;noIPR;IPR029058	GO:0006629;;;;GO:0008970;GO:0008970;;
Vitvi10g00562_t001	XP_002266934.1 protein CHUP1, chloroplastic	618	2	0	0.9927	Vitis vinifera	1				noIPR;noIPR;noIPR;noIPR;noIPR;noIPR;noIPR;noIPR;noIPR;noIPR;IPR040265;noIPR	;;;;;;;;;;;
Vitvi10g00563_t001	XP_002266892.1PREDICTED: uncharacterized protein LOC100253185	194	3	3.2e-138	0.9965	Vitis vinifera	1	1	GO:0005525		IPR037103;IPR011719;IPR011719;IPR011719	;;;
Vitvi10g00564_t001	XP_002274664.1 protein trichome birefringence-like 38	409	2	0	0.9927	Vitis vinifera	1				IPR025846;IPR026057;noIPR;IPR029962	;;;
Vitvi10g00565_t001	RVW18867.150S ribosomal protein L34, chloroplastic	174	1	1e-105	0.8286	Vitis vinifera	0.8286	3	GO:0003735;GO:0005840;GO:0006412		IPR000271;noIPR;IPR000271;noIPR;noIPR;IPR000271;IPR000271	GO:0006412/GO:0005840/GO:0003735;;GO:0006412/GO:0005840/GO:0003735;;;GO:0006412/GO:0005840/GO:0003735;GO:0006412/GO:0005840/GO:0003735
Vitvi10g04359_t001	RVW18857.1hypothetical protein CK203_097719	96	1	1.6e-61	0.9792	Vitis vinifera	0.9792
Vitvi10g00566_t001	XP_019078224.1 senescence-specific cysteine protease SAG39	274	1	1.3e-180	0.8135	Vitis vinifera	0.8135	2	GO:0006508;GO:0008234	EC:3.4	IPR000668;IPR000668;noIPR;noIPR;noIPR;noIPR;noIPR;noIPR;IPR000169;IPR039417;IPR038765	GO:0008234/GO:0006508;GO:0008234/GO:0006508;;;;;;;;;
Vitvi10g00567_t001	XP_002274223.1 senescence-specific cysteine protease SAG39	340	3	8.2e-248	0.999	Vitis vinifera	1	4	GO:0004197;GO:0005615;GO:0005764;GO:0051603	EC:3.4.22	IPR000668;IPR013201;IPR000668;IPR000668;noIPR;IPR013201;noIPR;noIPR;IPR025660;IPR000169;IPR025661;IPR039417;IPR038765	GO:0008234/GO:0006508;;GO:0008234/GO:0006508;GO:0008234/GO:0006508;;;;;;;;;
Vitvi10g00568_t001	XP_002274261.1PREDICTED: uncharacterized protein YNL011C isoform X1	462	2	0	0.9978	Vitis vinifera	1	1	GO:0043743	EC:2.7.1;EC:2.7.8.28	IPR002882;IPR038136;noIPR;noIPR;noIPR	GO:0043743;;;;
Vitvi10g01791_t001	XP_010655501.1PREDICTED: uncharacterized protein LOC100241184 isoform X1	235	3	5.8e-168	0.9858	Vitis vinifera	1				noIPR;noIPR	;
Vitvi10g01791_t002	XP_010655501.1PREDICTED: uncharacterized protein LOC100241184 isoform X1	235	3	5.8e-168	0.9858	Vitis vinifera	1				noIPR;noIPR	;
Vitvi10g01791_t003	XP_010655501.1PREDICTED: uncharacterized protein LOC100241184 isoform X1	235	3	5.8e-168	0.9858	Vitis vinifera	1				noIPR;noIPR	;
Vitvi10g04360_t001	RVW18864.1hypothetical protein CK203_097713	191	1	3.4e-105	0.7746	Vitis vinifera	0.7746	1	GO:0003676		IPR012677;IPR000504;noIPR;noIPR;IPR000504;IPR035979	;GO:0003676;;;GO:0003676;GO:0003676
Vitvi10g00570_t001	XP_002266726.1 U-box domain-containing protein 7	431	2	7.7e-283	0.9965	Vitis vinifera	1				noIPR;IPR011989;noIPR;noIPR;IPR016024	;;;;
Vitvi10g00571_t001	CBI30675.3unnamed protein product, partial	787	1	0	1	Vitis vinifera	1	2	GO:0005737;GO:0008641	EC:6.2	IPR032197;noIPR;IPR006285;IPR000594;IPR042522;IPR042523;noIPR;noIPR;noIPR;noIPR;IPR035985	;;GO:0005737;;;;;;;;GO:0008641
Vitvi10g00572_t001	XP_002273834.1 transcription factor bHLH106-like	258	2	1.2e-176	0.9942	Vitis vinifera	1	1	GO:0046983		noIPR;IPR011598;IPR011598;IPR036638;noIPR;noIPR;IPR011598;IPR036638	;GO:0046983;GO:0046983;GO:0046983;;;GO:0046983;GO:0046983
Vitvi10g00573_t001	CBI30676.3unnamed protein product, partial	411	1	9.5e-254	1	Vitis vinifera	1	2	GO:0009082;GO:0016491	EC:1	IPR013328;noIPR;IPR013116;noIPR;noIPR;noIPR;IPR013023;IPR013116;IPR036291	GO:0016491;;;;;;GO:0016491/GO:0009082;;
Vitvi10g01792_t001	RVW12965.1Ketol-acid reductoisomerase, chloroplastic	125	2	5.4e-83	1	Vitis vinifera	1	5	GO:0004455;GO:0009097;GO:0009099;GO:0016853;GO:0046872	EC:1.1.1.86;EC:5	IPR013328;noIPR;IPR013023;IPR000506;IPR008927	GO:0016491;;GO:0016491/GO:0009082;GO:0004455/GO:0009082;
Vitvi10g00574_t001	XP_002266602.1 plant-specific TFIIB-related protein PTF2	530	2	0	0.9991	Vitis vinifera	1	4	GO:0005634;GO:0017025;GO:0070897;GO:0097550		noIPR;noIPR;noIPR;IPR000812;noIPR;IPR036915;IPR036915	;;;GO:0006352/GO:0070897;;;
Vitvi10g00575_t001	XP_010655506.1PREDICTED: uncharacterized protein LOC100261780	133	2	1.2e-90	1	Vitis vinifera/Vitis riparia	1				IPR036758;IPR007493;IPR007493;noIPR;IPR036758	;;;;
Vitvi10g00576_t001	XP_002273741.2 heavy metal-associated isoprenylated plant protein 28	150	3	6.4e-103	1	Vitis vinifera/Vitis riparia	1	1	GO:0046872		noIPR;IPR006121;noIPR;noIPR;IPR006121;IPR006121;IPR036163	;GO:0046872;;;GO:0046872;GO:0046872;GO:0046872
Vitvi10g00577_t001	XP_002266564.2 putative lipase YDR444W isoform X1	460	3	0	0.9739	Vitis vinifera	1				IPR007751;IPR029058;noIPR;noIPR;noIPR;IPR044294;IPR029058	;;;;;;
Vitvi10g04361_t001	---NA---	110
Vitvi10g00579_t001	XP_002273375.2 14-3-3-like protein D isoform X2	261	3	6.8e-180	0.9987	Vitis vinifera/Vitis riparia	1				noIPR;noIPR;IPR000308;IPR023410;IPR036815;IPR023410;IPR000308;noIPR;IPR000308;IPR036815	;;;;;;;;;
Vitvi10g00579_t002	XP_019078148.1 14-3-3-like protein B isoform X3	244	4	3.2e-167	0.9969	Vitis vinifera	1				noIPR;noIPR;IPR000308;IPR023410;IPR023410;IPR000308;IPR036815;IPR000308;noIPR;IPR036815	;;;;;;;;;
Vitvi10g00579_t003	XP_010655514.1 14-3-3-like protein D isoform X1	262	3	2.5e-180	0.9975	Vitis vinifera/Vitis riparia	1				noIPR;noIPR;IPR000308;IPR023410;IPR023410;IPR000308;IPR036815;noIPR;IPR000308;IPR036815	;;;;;;;;;
Vitvi10g00579_t004	XP_019078148.1 14-3-3-like protein B isoform X3	244	4	3.2e-167	0.9969	Vitis vinifera	1				noIPR;noIPR;IPR000308;IPR023410;IPR023410;IPR000308;IPR036815;IPR000308;noIPR;IPR036815	;;;;;;;;;
Vitvi10g00580_t001	XP_002273294.1 olee1-like protein	168	2	2.2e-114	0.9911	Vitis vinifera	1				noIPR;noIPR;IPR006041	;;
Vitvi10g00581_t001	XP_002266522.2 dof zinc finger protein DOF1.5	159	3	8.6e-119	1	Vitis vinifera/Vitis riparia	1	4	GO:0003677;GO:0003700;GO:0005634;GO:0006355		IPR003851;noIPR;noIPR;IPR003851;IPR003851	GO:0003677/GO:0006355;;;GO:0003677/GO:0006355;GO:0003677/GO:0006355
Vitvi10g00582_t001	XP_010655516.1 protein SCAR3 isoform X1	1135	3	0	0.9971	Vitis vinifera	1	3	GO:0003779;GO:0005856;GO:0030036		noIPR;noIPR;noIPR;noIPR;noIPR;noIPR;noIPR;noIPR;noIPR;noIPR;noIPR;noIPR;noIPR;noIPR;noIPR;noIPR;IPR028288;IPR003124	;;;;;;;;;;;;;;;;GO:0005856/GO:0030036;GO:0003779
Vitvi10g00582_t002	XP_010655516.1 protein SCAR3 isoform X1	1134	3	0	0.9962	Vitis vinifera	0.9991	3	GO:0003779;GO:0005856;GO:0030036		noIPR;noIPR;noIPR;noIPR;noIPR;noIPR;noIPR;noIPR;noIPR;noIPR;noIPR;noIPR;noIPR;noIPR;IPR028288;noIPR;IPR003124	;;;;;;;;;;;;;;GO:0005856/GO:0030036;;GO:0003779
Vitvi10g00583_t001	XP_010655519.1 protein LIGHT-DEPENDENT SHORT HYPOCOTYLS 10	175	3	6.6e-124	1	Vitis vinifera	1	3	GO:0005634;GO:0009299;GO:0009416		IPR006936;noIPR;noIPR;noIPR;noIPR;IPR040222;IPR006936	;;;;;;
Vitvi10g00584_t001	XP_010655525.1 trihelix transcription factor ASIL1 isoform X4	281	11	2.2e-179	0.9968	Vitis vinifera	1	2	GO:0000976;GO:0005634		noIPR;noIPR;IPR044822;noIPR;noIPR;noIPR;noIPR;noIPR;IPR044823	;;;;;;;;
Vitvi10g00584_t002	XP_010655523.1 trihelix transcription factor ASIL1 isoform X2	299	2	6e-193	0.9983	Vitis vinifera	1				noIPR;noIPR;IPR044822;noIPR;noIPR;noIPR;noIPR;noIPR;IPR044823	;;;;;;;;
Vitvi10g00585_t001	XP_002272922.1PREDICTED: uncharacterized protein LOC100265230	173	2	1.3e-90	0.9711	Vitis vinifera	1				IPR025322;noIPR;noIPR;noIPR	;;;
Vitvi10g00586_t001	XP_002272882.1 peroxisome biogenesis protein 7	316	3	2.7e-103	0.9987	Vitis vinifera/Vitis riparia	1	4	GO:0005053;GO:0005515;GO:0005777;GO:0016558		IPR020472;IPR001680;IPR001680;IPR015943;IPR044536;noIPR;IPR019775;IPR001680;IPR001680;noIPR;noIPR;noIPR;noIPR;IPR001680;IPR001680;noIPR;IPR036322	;GO:0005515;GO:0005515;GO:0005515;GO:0016558/GO:0005053;;;GO:0005515;GO:0005515;;;;;GO:0005515;GO:0005515;;GO:0005515
Vitvi10g00587_t001	XP_002272779.1 abscisic acid receptor PYL11	191	2	6e-137	0.9974	Vitis vinifera/Vitis riparia	1	5	GO:0004864;GO:0005737;GO:0005886;GO:0009738;GO:0032515		IPR019587;IPR023393;noIPR;noIPR;noIPR;noIPR	;;;;;
Vitvi10g04362_t001	RVW12957.1Abscisic acid receptor PYL6	99	1	5.9e-53	1	Vitis vinifera	1	5	GO:0004864;GO:0005737;GO:0005886;GO:0009738;GO:0032515		noIPR;noIPR	;
Vitvi10g04363_t001	---NA---	92
Vitvi10g04364_t001	RVW83826.1F-box protein MAX2	266	1	1.3e-158	0.9696	Vitis vinifera	0.9696				noIPR;noIPR;noIPR;noIPR;noIPR;noIPR	;;;;;
Vitvi10g00591_t001	XP_002266308.2 low-temperature-induced cysteine proteinase	501	2	0	0.997	Vitis vinifera	1	2	GO:0006508;GO:0008234	EC:3.4	IPR000668;IPR013201;IPR000668;IPR000118;IPR000668;IPR000118;IPR037277;IPR013201;noIPR;noIPR;noIPR;noIPR;IPR000169;IPR025661;IPR025660;noIPR;IPR039417;noIPR;IPR038765;noIPR	GO:0008234/GO:0006508;;GO:0008234/GO:0006508;;GO:0008234/GO:0006508;;;;;;;;;;;;;;;
Vitvi10g00591_t002	XP_002266308.2 low-temperature-induced cysteine proteinase	501	2	0	0.997	Vitis vinifera	1	2	GO:0006508;GO:0008234	EC:3.4	IPR000668;IPR013201;IPR000668;IPR000118;IPR000668;IPR000118;IPR037277;IPR013201;noIPR;noIPR;noIPR;noIPR;IPR000169;IPR025661;IPR025660;noIPR;IPR039417;noIPR;IPR038765;noIPR	GO:0008234/GO:0006508;;GO:0008234/GO:0006508;;GO:0008234/GO:0006508;;;;;;;;;;;;;;;
Vitvi10g00592_t001	RVW83828.1hypothetical protein CK203_041810	742	4	0	0.9626	Vitis vinifera	0.9603	1	GO:0016021		IPR007789;noIPR;noIPR;noIPR;noIPR;noIPR;noIPR;noIPR;noIPR;noIPR	;;;;;;;;;
Vitvi10g01793_t001	XP_019078026.1PREDICTED: uncharacterized protein LOC104880489 isoform X1	489	1	0	1	Vitis vinifera	1	2	GO:0003677;GO:0003700		IPR017930;IPR006447;noIPR;noIPR;noIPR;noIPR;noIPR;noIPR;noIPR;noIPR;IPR044848;IPR017930;IPR009057	;GO:0003677;;;;;;;;;GO:0003700;;
Vitvi10g00593_t001	XP_002272019.1 plant cysteine oxidase 4	244	2	3.5e-187	1	Vitis vinifera	1	2	GO:0017172;GO:0046872	EC:1.13.11.20	IPR014710;IPR012864;noIPR;noIPR;noIPR;IPR011051	;GO:0016702;;;;
Vitvi10g04365_t001	RVW31900.1Plant cysteine oxidase 4	96	1	6.1e-61	1	Vitis vinifera	1	2	GO:0017172;GO:0046872	EC:1.13.11.20
Vitvi10g04366_t001	CBI27333.3unnamed protein product, partial	187	1	1.6e-63	0.7389	Vitis vinifera	0.7389
Vitvi10g04367_t001	CAN68715.1hypothetical protein VITISV_004899	152	1	1.5e-92	1	Vitis vinifera	1	8	GO:0003676;GO:0004523;GO:0005634;GO:0015074;GO:0016021;GO:0030430;GO:0046872;GO:0090502	EC:3.1.30;EC:3.1.26.4
Vitvi10g04368_t001	RVW83800.1Protein MALE DISCOVERER 2	133	1	4.9e-35	0.5935	Vitis vinifera	0.5935
Vitvi10g00597_t001	XP_002266057.1 protein MALE DISCOVERER 2 isoform X1	724	2	0	0.9966	Vitis vinifera	1	4	GO:0004672;GO:0005515;GO:0005524;GO:0006468	EC:2.7.1	IPR001611;IPR013210;IPR001245;noIPR;IPR032675;noIPR;noIPR;noIPR;noIPR;noIPR;noIPR;IPR000719;IPR011009;noIPR	GO:0005515;;GO:0004672/GO:0006468;;;;;;;;;GO:0005524/GO:0004672/GO:0006468;;
Vitvi10g00598_t001	XP_002266016.2 protein DOG1-like 4	245	2	3e-166	0.998	Vitis vinifera	1	2	GO:0006351;GO:0043565		noIPR;IPR025422;noIPR;noIPR;IPR025422	;GO:0006351/GO:0043565;;;GO:0006351/GO:0043565
Vitvi10g00599_t001	NP_001267894.1CBL-interacting protein kinase 16	450	3	0	0.9919	Vitis vinifera	0.9956	5	GO:0005524;GO:0006468;GO:0007165;GO:0106310;GO:0106311	EC:2.7.11.1	IPR000719;IPR004041;noIPR;IPR000719;noIPR;noIPR;noIPR;noIPR;noIPR;noIPR;IPR017441;IPR008271;IPR018451;IPR000719;noIPR;noIPR;IPR011009	GO:0005524/GO:0004672/GO:0006468;GO:0007165;;GO:0005524/GO:0004672/GO:0006468;;;;;;;GO:0005524;GO:0004672/GO:0006468;GO:0007165;GO:0005524/GO:0004672/GO:0006468;;;
Vitvi10g00600_t001	XP_010655436.1 CBL-interacting protein kinase 01 isoform X1	502	4	0	0.9811	Vitis vinifera	1	6	GO:0005524;GO:0006468;GO:0007165;GO:0016021;GO:0106310;GO:0106311	EC:2.7.11.1	IPR000719;IPR004041;IPR000719;noIPR;noIPR;noIPR;noIPR;noIPR;noIPR;noIPR;noIPR;IPR008271;IPR017441;IPR000719;IPR018451;noIPR;noIPR;IPR011009	GO:0005524/GO:0004672/GO:0006468;GO:0007165;GO:0005524/GO:0004672/GO:0006468;;;;;;;;;GO:0004672/GO:0006468;GO:0005524;GO:0005524/GO:0004672/GO:0006468;GO:0007165;;;
Vitvi10g00601_t001	RVW31918.1Calmodulin-binding receptor kinase CaMRLK	472	3	0	0.9936	Vitis vinifera	1	4	GO:0004672;GO:0005524;GO:0006468;GO:0016021	EC:2.7.1	noIPR;noIPR;noIPR;IPR001245;noIPR;noIPR;noIPR;noIPR;IPR000719;IPR011009	;;;GO:0004672/GO:0006468;;;;;GO:0005524/GO:0004672/GO:0006468;
Vitvi10g00601_t002	XP_002265984.2 probable LRR receptor-like serine/threonine-protein kinase At2g24230	683	3	0	0.9912	Vitis vinifera	1	5	GO:0004672;GO:0005515;GO:0005524;GO:0006468;GO:0016021	EC:2.7.1	IPR003591;IPR001611;IPR001611;IPR001245;noIPR;IPR032675;noIPR;noIPR;IPR032675;noIPR;noIPR;noIPR;IPR000719;IPR001611;IPR011009;noIPR	;GO:0005515;GO:0005515;GO:0004672/GO:0006468;;;;;;;;;GO:0005524/GO:0004672/GO:0006468;GO:0005515;;
Vitvi10g01794_t001	XP_003633014.1PREDICTED: uncharacterized protein LOC100854923 isoform X1	402	2	1.5e-256	0.9988	Vitis vinifera	1	2	GO:0005634;GO:0006355		noIPR;IPR012479;noIPR;noIPR;noIPR;noIPR;noIPR;noIPR;IPR012479	;GO:0006355;;;;;;;GO:0006355
Vitvi10g01794_t002	XP_010655534.1PREDICTED: uncharacterized protein LOC100854923 isoform X2	346	4	1.1e-221	0.9985	Vitis vinifera	1	2	GO:0005634;GO:0006355		noIPR;IPR012479;noIPR;noIPR;noIPR;noIPR;noIPR;IPR012479	;GO:0006355;;;;;;GO:0006355
Vitvi10g01794_t003	XP_010655534.1PREDICTED: uncharacterized protein LOC100854923 isoform X2	346	4	1.1e-221	0.9985	Vitis vinifera	1	2	GO:0005634;GO:0006355		noIPR;IPR012479;noIPR;noIPR;noIPR;noIPR;noIPR;IPR012479	;GO:0006355;;;;;;GO:0006355
Vitvi10g01794_t004	XP_003633014.1PREDICTED: uncharacterized protein LOC100854923 isoform X1	402	2	1.5e-256	0.9988	Vitis vinifera	1	2	GO:0005634;GO:0006355		noIPR;IPR012479;noIPR;noIPR;noIPR;noIPR;noIPR;noIPR;IPR012479	;GO:0006355;;;;;;;GO:0006355
Vitvi10g00602_t001	XP_002265912.2 nucleobase-ascorbate transporter 2	524	4	0	0.9924	Vitis vinifera	1	3	GO:0016021;GO:0022857;GO:0055085	EC:7	IPR006043;IPR029948;noIPR	GO:0055085/GO:0022857/GO:0016020;;
Vitvi10g00603_t001	XP_034698237.1O-fucosyltransferase 8 isoform X1	629	2	0	0.9984	Vitis vinifera	1	3	GO:0006004;GO:0016021;GO:0016740	EC:2	IPR024709;IPR019378;noIPR;noIPR;IPR024709	;;;;
Vitvi10g00604_t001	XP_003633016.1 shaggy-related protein kinase eta isoform X1	380	20	1e-284	0.9822	Vitis vinifera/Vitis riparia	1	16	GO:0005524;GO:0005634;GO:0005829;GO:0005886;GO:0005938;GO:0009729;GO:0009733;GO:0009825;GO:0009965;GO:0042802;GO:0046777;GO:0046827;GO:0048765;GO:0106310;GO:0106311;GO:1900458	EC:2.7.11.1	IPR000719;noIPR;noIPR;IPR000719;noIPR;noIPR;noIPR;noIPR;IPR008271;IPR017441;IPR000719;IPR039192;IPR011009	GO:0005524/GO:0004672/GO:0006468;;;GO:0005524/GO:0004672/GO:0006468;;;;;GO:0004672/GO:0006468;GO:0005524;GO:0005524/GO:0004672/GO:0006468;;
Vitvi10g00604_t002	XP_010655538.1 shaggy-related protein kinase eta isoform X2	376	20	5.8e-282	0.9831	Vitis vinifera/Vitis riparia	1	16	GO:0005524;GO:0005634;GO:0005829;GO:0005886;GO:0005938;GO:0009729;GO:0009733;GO:0009825;GO:0009965;GO:0042802;GO:0046777;GO:0046827;GO:0048765;GO:0106310;GO:0106311;GO:1900458	EC:2.7.11.1	IPR000719;noIPR;noIPR;IPR000719;noIPR;noIPR;noIPR;noIPR;IPR008271;IPR017441;IPR000719;IPR039192;IPR011009	GO:0005524/GO:0004672/GO:0006468;;;GO:0005524/GO:0004672/GO:0006468;;;;;GO:0004672/GO:0006468;GO:0005524;GO:0005524/GO:0004672/GO:0006468;;
Vitvi10g00605_t002	XP_003633015.1 probable LRR receptor-like serine/threonine-protein kinase At5g45780 isoform X1	551	5	1.3e-301	0.9742	Vitis vinifera	1	9	GO:0004672;GO:0005515;GO:0005524;GO:0005886;GO:0006468;GO:0007639;GO:0015026;GO:0016021;GO:0048653	EC:2.7.1	IPR003591;IPR000719;noIPR;noIPR;IPR013210;IPR000719;IPR025875;IPR032675;noIPR;noIPR;noIPR;IPR008271;IPR017441;IPR000719;IPR001611;IPR011009;noIPR	;GO:0005524/GO:0004672/GO:0006468;;;;GO:0005524/GO:0004672/GO:0006468;;;;;;GO:0004672/GO:0006468;GO:0005524;GO:0005524/GO:0004672/GO:0006468;GO:0005515;;
Vitvi10g00605_t001	XP_003633015.1 probable LRR receptor-like serine/threonine-protein kinase At5g45780 isoform X1	620	5	0	0.9774	Vitis vinifera	1	9	GO:0004672;GO:0005515;GO:0005524;GO:0005886;GO:0006468;GO:0007639;GO:0015026;GO:0016021;GO:0048653	EC:2.7.1	IPR000719;IPR003591;IPR032675;noIPR;noIPR;IPR000719;IPR013210;noIPR;noIPR;noIPR;IPR008271;IPR017441;IPR000719;IPR001611;IPR011009;noIPR	GO:0005524/GO:0004672/GO:0006468;;;;;GO:0005524/GO:0004672/GO:0006468;;;;;GO:0004672/GO:0006468;GO:0005524;GO:0005524/GO:0004672/GO:0006468;GO:0005515;;
Vitvi10g00605_t003	XP_034697124.1probable LRR receptor-like serine/threonine-protein kinase At5g45780 isoform X1	415	4	5.6e-199	0.9579	Vitis riparia	1	4	GO:0004672;GO:0005515;GO:0005524;GO:0006468	EC:2.7.1	IPR003591;IPR013210;IPR000719;noIPR;IPR025875;IPR032675;noIPR;noIPR;IPR017441;IPR001611;IPR000719;noIPR;IPR011009	;;GO:0005524/GO:0004672/GO:0006468;;;;;;GO:0005524;GO:0005515;GO:0005524/GO:0004672/GO:0006468;;
Vitvi10g04369_t001	---NA---	101
Vitvi10g00607_t001	XP_010655539.1PREDICTED: uncharacterized protein LOC100254917	197	3	7.1e-129	0.9628	Vitis vinifera	1	2	GO:0008270;GO:0016021		IPR011016;IPR011016;IPR013083;noIPR;noIPR;noIPR;IPR011016;noIPR	GO:0008270;GO:0008270;;;;;GO:0008270;
Vitvi10g04370_t001	XP_002263596.2 AT-rich interactive domain-containing protein 5	120	3	8.4e-29	0.9355	Vitis vinifera	0.9355	5	GO:0003677;GO:0005634;GO:0006342;GO:0006357;GO:0032991		noIPR;IPR045147;IPR036431	;GO:0006357;GO:0003677
Vitvi10g00608_t001	CBI30708.3unnamed protein product, partial	200	1	1.5e-139	1	Vitis vinifera	1	4	GO:0005049;GO:0005643;GO:0005737;GO:0006611		IPR044189;noIPR	GO:0005049/GO:0051169;
Vitvi10g00609_t001	XP_002270266.1 60S ribosomal protein L11-1	183	4	1.1e-128	0.9918	Vitis vinifera	1	3	GO:0003735;GO:0005840;GO:0006412		IPR002132;IPR031310;IPR022803;IPR031309;noIPR;IPR002132;IPR020929;IPR022803	GO:0006412/GO:0005840/GO:0003735;;;;;GO:0006412/GO:0005840/GO:0003735;GO:0006412/GO:0005840/GO:0003735;
Vitvi10g01796_t001	XP_002270114.1 SAP-like protein BP-73 isoform X1	262	2	1.5e-172	0.9943	Vitis vinifera	1	2	GO:0005829;GO:0006353		IPR011112;noIPR;noIPR;noIPR;noIPR;noIPR;noIPR;noIPR;IPR036269	GO:0006353;;;;;;;;
Vitvi10g00611_t001	XP_010655542.1 pentatricopeptide repeat-containing protein DOT4, chloroplastic	876	4	0	0.9977	Vitis vinifera	1	2	GO:0005515;GO:0008270		IPR002885;IPR002885;IPR011990;IPR002885;IPR011990;IPR032867;noIPR;noIPR;noIPR;noIPR;noIPR;noIPR;noIPR;noIPR;noIPR;noIPR;noIPR;noIPR;IPR002885;IPR002885;IPR002885;IPR002885;IPR002885;IPR002885;IPR002885;IPR011990	;;GO:0005515;;GO:0005515;GO:0008270;;;;;;;;;;;;;;;;;;;;GO:0005515
Vitvi10g00612_t001	XP_010655543.1 receptor-like protein 51	440	2	1.4e-170	0.9966	Vitis vinifera	1	2	GO:0005515;GO:0016021		IPR001611;IPR001611;IPR032675;noIPR;noIPR;noIPR;noIPR;noIPR;noIPR	GO:0005515;GO:0005515;;;;;;;
Vitvi10g00613_t001	XP_019078064.1 cellulose synthase A catalytic subunit 8 [UDP-forming]	983	5	0	0.9944	Vitis vinifera	1	8	GO:0005802;GO:0005886;GO:0009833;GO:0016021;GO:0016760;GO:0030244;GO:0046872;GO:0071555	EC:2.4.1.12	IPR013083;IPR005150;IPR029044;IPR027934;noIPR;noIPR;noIPR;noIPR;noIPR;IPR029044	;GO:0016760/GO:0030244/GO:0016020;;;;;;;;
Vitvi10g00614_t001	XP_019078064.1 cellulose synthase A catalytic subunit 8 [UDP-forming]	375	2	6e-261	0.9933	Vitis vinifera	1	1	GO:0005515		IPR001680;IPR001680;IPR015943;IPR015943;noIPR;noIPR;IPR019775;IPR001680;IPR001680;noIPR;IPR036322	GO:0005515;GO:0005515;GO:0005515;GO:0005515;;;;GO:0005515;GO:0005515;;GO:0005515
Vitvi10g04371_t001	CAN61930.1hypothetical protein VITISV_029934	191	1	1.6e-130	0.9948	Vitis vinifera	0.9948				noIPR;noIPR	;
Vitvi10g00615_t001	XP_002269394.1PREDICTED: uncharacterized protein LOC100266883	230	3	9.2e-158	0.9913	Vitis vinifera	1				IPR012881;noIPR;noIPR;noIPR;noIPR	;;;;
Vitvi10g00617_t001	XP_002265581.2PREDICTED: uncharacterized protein LOC100263463	169	1	2.1e-108	1	Vitis vinifera/Vitis riparia	1				noIPR;noIPR;IPR002912	;;
Vitvi10g00618_t001	XP_002269267.1 probable WRKY transcription factor 65	278	2	1.9e-199	0.9982	Vitis vinifera	1	4	GO:0000976;GO:0003700;GO:0005634;GO:0006355		IPR003657;IPR003657;IPR036576;noIPR;noIPR;noIPR;noIPR;IPR044810;IPR003657;IPR036576	GO:0003700/GO:0043565/GO:0006355;GO:0003700/GO:0043565/GO:0006355;GO:0003700/GO:0043565/GO:0006355;;;;;GO:0003700;GO:0003700/GO:0043565/GO:0006355;GO:0003700/GO:0043565/GO:0006355
Vitvi10g00619_t001	XP_002268815.1 ras-related protein RABA1d	218	20	6.6e-152	0.9855	Vitis vinifera/Vitis riparia	1	4	GO:0003924;GO:0005525;GO:0006886;GO:0012505	EC:3.6.1	noIPR;IPR001806;noIPR;noIPR;noIPR;IPR005225;IPR001806;IPR027417;noIPR;noIPR;noIPR;noIPR;IPR001806;noIPR;IPR027417	;GO:0005525/GO:0003924;;;;GO:0005525;GO:0005525/GO:0003924;;;;;;GO:0005525/GO:0003924;;
Vitvi10g04372_t001	RVW83789.1hypothetical protein CK203_041771	136	1	3.2e-77	0.763	Vitis vinifera	0.763				noIPR;noIPR	;
Vitvi10g04373_t001	RVW83790.1hypothetical protein CK203_041770	186	1	2.8e-117	1	Vitis vinifera	1
Vitvi10g00622_t001	XP_034698255.1protein HIGH CHLOROPHYLL FLUORESCENCE PHENOTYPE 173, chloroplastic	605	2	0	0.9967	Vitis vinifera	1	3	GO:0009570;GO:0010257;GO:0051082		noIPR;noIPR;IPR013857;IPR016040;IPR039131;noIPR;IPR008979;IPR036291	;;;;;;;
Vitvi10g01798_t001	RVW31892.1 Precursor of CEP14	97	1	1e-58	1	Vitis vinifera	1	2	GO:0006970;GO:0006995		IPR038930	GO:0006970/GO:0006995
Vitvi10g04374_t001	RVW31906.1hypothetical protein CK203_087122	66	1	1.1e-38	1	Vitis vinifera	1
Vitvi10g01799_t001	XP_010655544.1PREDICTED: uncharacterized protein LOC104880492	164	3	3.6e-96	0.9979	Vitis vinifera	1	2	GO:0005615;GO:0010227		noIPR;noIPR;noIPR;IPR039639	;;;GO:0010227
Vitvi10g04375_t001	CAN69944.1hypothetical protein VITISV_006132	161	1	1.4e-109	1	Vitis vinifera	1				noIPR;noIPR;IPR042160;noIPR	;;;
Vitvi10g00624_t001	XP_002265342.2 phosphate-repressible phosphate permease pho-4	596	2	0	0.9966	Vitis vinifera	1	3	GO:0005315;GO:0006817;GO:0016020	EC:7	IPR001204;noIPR;IPR001204;noIPR	GO:0006817/GO:0005315/GO:0016020;;GO:0006817/GO:0005315/GO:0016020;
Vitvi10g04376_t001	---NA---	86
Vitvi10g00625_t001	XP_002268174.1 probable alpha,alpha-trehalose-phosphate synthase [UDP-forming] 7	853	2	0	0.9988	Vitis vinifera	1	3	GO:0003824;GO:0005829;GO:0005992		IPR003337;noIPR;IPR001830;IPR023214;noIPR;IPR006379;IPR003337;IPR001830;noIPR;noIPR;IPR001830;noIPR;IPR036412	GO:0005992/GO:0003824;;GO:0005992/GO:0003824;;;;GO:0005992/GO:0003824;GO:0005992/GO:0003824;;;GO:0005992/GO:0003824;;
Vitvi10g04377_t001	---NA---	122
Vitvi10g00626_t001	XP_002268081.1 IRK-interacting protein	482	2	0	0.9917	Vitis vinifera	1	2	GO:0009639;GO:0009959		noIPR;IPR006943;noIPR;IPR040225	;;;GO:0009639/GO:0009959
Vitvi10g00627_t001	XP_002267990.1 ER lumen protein-retaining receptor A isoform X1	215	2	4.3e-151	1	Vitis vinifera	1	7	GO:0005789;GO:0005801;GO:0006621;GO:0006888;GO:0015031;GO:0016021;GO:0046923		IPR000133;IPR000133;IPR000133;noIPR;IPR000133;IPR000133	GO:0016021/GO:0006621/GO:0046923;GO:0016021/GO:0006621/GO:0046923;GO:0016021/GO:0006621/GO:0046923;;GO:0016021/GO:0046923/GO:0006621;GO:0016021/GO:0046923/GO:0006621
Vitvi10g00627_t002	XP_002267990.1 ER lumen protein-retaining receptor A isoform X1	153	3	2.7e-108	1	Vitis vinifera	1	7	GO:0005789;GO:0005801;GO:0006621;GO:0006888;GO:0015031;GO:0016021;GO:0046923		IPR000133;IPR000133;IPR000133;noIPR;IPR000133	GO:0016021/GO:0006621/GO:0046923;GO:0016021/GO:0006621/GO:0046923;GO:0016021/GO:0006621/GO:0046923;;GO:0016021/GO:0006621/GO:0046923
Vitvi10g00628_t001	XP_002267858.1 ubiquitin domain-containing protein 1	114	2	1.2e-76	0.9956	Vitis vinifera	1				IPR032752;IPR038169;noIPR;noIPR;IPR039869	;;;;
Vitvi10g04378_t001	---NA---	90
Vitvi10g00629_t001	XP_010655545.1 protein STICHEL-like 3 isoform X1	1181	3	0	0.9495	Vitis vinifera	0.9625	5	GO:0003677;GO:0003887;GO:0005524;GO:0006260;GO:0009360	EC:2.7.7.7	noIPR;IPR003593;noIPR;IPR012763;noIPR;noIPR;IPR027417;IPR022754;noIPR;noIPR;noIPR;noIPR;noIPR;noIPR;noIPR;noIPR;noIPR;noIPR;noIPR;noIPR;noIPR;IPR045085;IPR008921;IPR027417	;;;GO:0003887/GO:0006260/GO:0009360/GO:0005524;;;;GO:0003887;;;;;;;;;;;;;;;GO:0006260/GO:0003677;
Vitvi10g00630_t001	XP_019078249.1 U-box domain-containing protein 17	714	2	0	0.9986	Vitis vinifera	1	3	GO:0004842;GO:0005515;GO:0016567	EC:2	IPR000225;IPR003613;IPR011989;IPR013083;IPR000225;IPR011989;IPR003613;noIPR;noIPR;IPR003613;IPR000225;IPR000225;noIPR;IPR016024;noIPR	GO:0005515;GO:0016567/GO:0004842;;;GO:0005515;;GO:0016567/GO:0004842;;;GO:0016567/GO:0004842;GO:0005515;GO:0005515;;;
Vitvi10g00631_t001	XP_010655548.1PREDICTED: uncharacterized protein LOC100265127	508	3	0	0.9915	Vitis vinifera	1				noIPR;noIPR	;
Vitvi10g00632_t001	XP_002265116.1 transcription repressor OFP5	444	2	4.1E-312	0.9921	Vitis vinifera	1	2	GO:0005634;GO:0045892		IPR006458;IPR006458;noIPR;noIPR;noIPR;noIPR;noIPR;noIPR;noIPR;noIPR;IPR038933;IPR006458	;;;;;;;;;;GO:0045892;
Vitvi10g00634_t001	XP_002265079.1 pentatricopeptide repeat-containing protein At4g18840	536	3	4.4e-296	0.9521	Vitis vinifera	1	1	GO:0005515		IPR002885;IPR011990;IPR002885;IPR002885;IPR011990;noIPR;noIPR;IPR002885;IPR002885;IPR002885;IPR002885;IPR002885;IPR002885;IPR002885;IPR011990	;GO:0005515;;;GO:0005515;;;;;;;;;;GO:0005515
Vitvi10g00635_t001	XP_010655551.1 heat stress transcription factor A-4a	448	4	8.2e-282	0.9933	Vitis vinifera	1	4	GO:0003700;GO:0005634;GO:0006355;GO:0043565		noIPR;IPR000232;IPR000232;IPR000232;IPR036388;noIPR;noIPR;noIPR;noIPR;IPR027725;noIPR;IPR000232;IPR036390	;GO:0003700/GO:0043565/GO:0006355;GO:0003700/GO:0043565/GO:0006355;GO:0003700/GO:0043565/GO:0006355;;;;;;;;GO:0003700/GO:0043565/GO:0006355;
Vitvi10g00635_t002	XP_010655551.1 heat stress transcription factor A-4a	448	4	8.2e-282	0.9933	Vitis vinifera	1	4	GO:0003700;GO:0005634;GO:0006355;GO:0043565		noIPR;IPR000232;IPR000232;IPR000232;IPR036388;noIPR;noIPR;noIPR;noIPR;IPR027725;noIPR;IPR000232;IPR036390	;GO:0003700/GO:0043565/GO:0006355;GO:0003700/GO:0043565/GO:0006355;GO:0003700/GO:0043565/GO:0006355;;;;;;;;GO:0003700/GO:0043565/GO:0006355;
Vitvi10g00636_t001	XP_002267082.1 BES1/BZR1 homolog protein 4 isoform X1	341	3	5.6e-219	0.9542	Vitis vinifera	1	3	GO:0003700;GO:0006355;GO:0009742		IPR008540;noIPR;noIPR;IPR033264;IPR033264;noIPR	;;;GO:0003700/GO:0006351/GO:0009742;GO:0003700/GO:0006351/GO:0009742;
Vitvi10g00637_t001	XP_002266858.1PREDICTED: uncharacterized protein LOC100241291 isoform X1	525	3	0	0.9975	Vitis vinifera	1	2	GO:0035091;GO:0046872		IPR000306;IPR013083;IPR000306;IPR007461;noIPR;noIPR;noIPR;noIPR;IPR017455;noIPR;IPR011011	GO:0046872;;GO:0046872;;;;;;;;
Vitvi10g00637_t002	XP_002266858.1PREDICTED: uncharacterized protein LOC100241291 isoform X1	525	3	0	0.9975	Vitis vinifera	1	2	GO:0035091;GO:0046872		IPR000306;IPR013083;IPR000306;IPR007461;noIPR;noIPR;noIPR;noIPR;IPR017455;noIPR;IPR011011	GO:0046872;;GO:0046872;;;;;;;;
Vitvi10g00637_t003	XP_002266858.1PREDICTED: uncharacterized protein LOC100241291 isoform X1	474	5	0	0.9975	Vitis vinifera	1	2	GO:0035091;GO:0046872		noIPR;IPR000306;IPR013083;IPR000306;IPR007461;noIPR;noIPR;IPR017455;noIPR;IPR011011	;GO:0046872;;GO:0046872;;;;;;
Vitvi10g04379_t001	CBI30733.3unnamed protein product, partial	100	1	2.7e-59	1	Vitis vinifera	1				noIPR;noIPR	;
Vitvi10g00638_t001	XP_002264996.1 carboxy-terminal domain RNA polymerase II polypeptide A small phosphatase 1-like	285	2	1.8e-203	0.9982	Vitis vinifera	1	1	GO:0016791	EC:3.1.3	IPR004274;IPR004274;IPR023214;IPR011948;noIPR;noIPR;IPR004274;noIPR;IPR036412	;;;GO:0016791;;;;;
Vitvi10g00639_t001	XP_002264957.2 aquaporin NIP1-1	282	4	3.4e-179	0.9681	Vitis vinifera	1	3	GO:0015267;GO:0016021;GO:0055085	EC:7	IPR000425;IPR023271;IPR000425;IPR000425;noIPR;IPR034294;IPR022357;IPR000425;IPR023271	GO:0055085/GO:0015267/GO:0016020;;GO:0055085/GO:0015267/GO:0016020;GO:0055085/GO:0015267/GO:0016020;;;;GO:0055085/GO:0015267/GO:0016020;
Vitvi10g00640_t001	XP_002264921.1 seipin-2	508	2	0	0.9892	Vitis vinifera	1	1	GO:0019915		IPR009617;noIPR;noIPR;noIPR;noIPR;IPR009617	GO:0019915;;;;;GO:0019915
Vitvi10g00641_t001	XP_010655556.1 probable LRR receptor-like serine/threonine-protein kinase RFK1 isoform X1	1067	1	0	1	Vitis vinifera	1	3	GO:0004672;GO:0005524;GO:0006468	EC:2.7.1	IPR000719;IPR003591;IPR032675;IPR032675;IPR021720;IPR025875;IPR000719;noIPR;noIPR;noIPR;noIPR;noIPR;noIPR;noIPR;noIPR;IPR008271;IPR000719;noIPR;noIPR;IPR011009	GO:0005524/GO:0004672/GO:0006468;;;;;;GO:0005524/GO:0004672/GO:0006468;;;;;;;;;GO:0004672/GO:0006468;GO:0005524/GO:0004672/GO:0006468;;;
Vitvi10g01592_t001	XP_002264830.2 agamous-like MADS-box protein AGL62	223	4	9e-157	0.9854	Vitis vinifera	1	4	GO:0000977;GO:0005634;GO:0045944;GO:0046983		noIPR;IPR002100;IPR002100;IPR036879;IPR002100;noIPR;noIPR;IPR002100;IPR033896;IPR036879	;GO:0046983/GO:0003677;GO:0046983/GO:0003677;GO:0046983/GO:0003677;GO:0046983/GO:0003677;;;GO:0046983/GO:0003677;GO:0045944/GO:0000977;GO:0046983/GO:0003677
Vitvi10g04380_t001	CAN83124.1hypothetical protein VITISV_015108	281	1	1.8e-169	0.8135	Vitis vinifera	0.8135	2	GO:0004252;GO:0006508	EC:3.4.21	IPR036852;noIPR;IPR045051;noIPR;IPR036852	GO:0004252/GO:0006508;;;;GO:0004252/GO:0006508
Vitvi10g00643_t001	XP_010655572.1 probable LRR receptor-like serine/threonine-protein kinase RFK1 isoform X2	1013	6	0	0.9673	Vitis vinifera	1	3	GO:0004672;GO:0005524;GO:0006468	EC:2.7.1	IPR000719;noIPR;IPR032675;noIPR;IPR001245;IPR032675;IPR021720;noIPR;noIPR;noIPR;IPR008271;IPR000719;noIPR;IPR011009;noIPR	GO:0005524/GO:0004672/GO:0006468;;;;GO:0004672/GO:0006468;;;;;;GO:0004672/GO:0006468;GO:0005524/GO:0004672/GO:0006468;;;
Vitvi10g01804_t001	XP_010655565.2PREDICTED: uncharacterized protein LOC100244640	1009	2	0	0.9975	Vitis vinifera	1	3	GO:0004672;GO:0005524;GO:0006468	EC:2.7.1	IPR000719;IPR021720;noIPR;IPR032675;IPR001245;IPR032675;noIPR;noIPR;noIPR;noIPR;IPR008271;IPR000719;noIPR;noIPR;IPR011009	GO:0005524/GO:0004672/GO:0006468;;;;GO:0004672/GO:0006468;;;;;;GO:0004672/GO:0006468;GO:0005524/GO:0004672/GO:0006468;;;
Vitvi10g00644_t001	XP_034697463.1probable LRR receptor-like serine/threonine-protein kinase At1g07650 isoform X2	994	5	0	0.9643	Vitis vinifera	1	4	GO:0004672;GO:0005515;GO:0005524;GO:0006468	EC:2.7.1	IPR000719;IPR000719;IPR032675;IPR021720;IPR032675;noIPR;IPR032675;IPR001611;noIPR;noIPR;noIPR;noIPR;noIPR;IPR017441;IPR008271;IPR000719;IPR001611;noIPR;IPR011009;noIPR	GO:0005524/GO:0004672/GO:0006468;GO:0005524/GO:0004672/GO:0006468;;;;;;GO:0005515;;;;;;GO:0005524;GO:0004672/GO:0006468;GO:0005524/GO:0004672/GO:0006468;GO:0005515;;;
Vitvi10g00647_t001	XP_010655560.1 probable LRR receptor-like serine/threonine-protein kinase At1g07650 isoform X1	948	4	0	0.9388	Vitis vinifera	0.9773	4	GO:0004672;GO:0005515;GO:0005524;GO:0006468	EC:2.7.1	IPR000719;IPR032675;IPR032675;noIPR;noIPR;noIPR;IPR001245;IPR021720;noIPR;noIPR;IPR008271;IPR000719;IPR001611;noIPR;noIPR;IPR011009	GO:0005524/GO:0004672/GO:0006468;;;;;;GO:0004672/GO:0006468;;;;GO:0004672/GO:0006468;GO:0005524/GO:0004672/GO:0006468;GO:0005515;;;
Vitvi10g04381_t001	XP_010655558.1 probable LRR receptor-like serine/threonine-protein kinase At1g07650 isoform X1	1003	4	0	0.9855	Vitis vinifera	1	4	GO:0004672;GO:0005515;GO:0005524;GO:0006468	EC:2.7.1	IPR000719;IPR021720;IPR032675;IPR000719;IPR032675;IPR032675;noIPR;noIPR;noIPR;noIPR;noIPR;noIPR;IPR008271;IPR017441;IPR001611;IPR000719;noIPR;IPR011009;noIPR	GO:0005524/GO:0004672/GO:0006468;;;GO:0005524/GO:0004672/GO:0006468;;;;;;;;;GO:0004672/GO:0006468;GO:0005524;GO:0005515;GO:0005524/GO:0004672/GO:0006468;;;
Vitvi10g04382_t001	XP_010655574.1 probable LRR receptor-like serine/threonine-protein kinase At1g07650 isoform X1	1008	3	0	0.9524	Vitis vinifera	1	4	GO:0004672;GO:0005515;GO:0005524;GO:0006468	EC:2.7.1	IPR000719;IPR021720;IPR032675;IPR001245;IPR032675;noIPR;noIPR;noIPR;noIPR;noIPR;noIPR;IPR008271;IPR017441;IPR000719;IPR001611;noIPR;IPR011009;noIPR	GO:0005524/GO:0004672/GO:0006468;;;GO:0004672/GO:0006468;;;;;;;;GO:0004672/GO:0006468;GO:0005524;GO:0005524/GO:0004672/GO:0006468;GO:0005515;;;
Vitvi10g04383_t001	RVW79035.1hypothetical protein CK203_040131	129	1	2.4e-58	1	Vitis vinifera	1
Vitvi10g04384_t001	XP_034697445.1probable LRR receptor-like serine/threonine-protein kinase At1g07650 isoform X4	95	5	8.8e-49	0.9291	Vitis riparia	0.9029	2	GO:0016301;GO:0016310	EC:2.7
Vitvi10g00651_t001	XP_010655586.1 probable LRR receptor-like serine/threonine-protein kinase At1g07650	1006	3	0	0.9901	Vitis vinifera	1	4	GO:0004672;GO:0005515;GO:0005524;GO:0006468	EC:2.7.1	IPR000719;IPR000719;noIPR;IPR032675;IPR032675;IPR021720;noIPR;IPR001611;noIPR;IPR032675;noIPR;noIPR;noIPR;noIPR;IPR017441;IPR008271;IPR000719;IPR001611;noIPR;noIPR;IPR011009	GO:0005524/GO:0004672/GO:0006468;GO:0005524/GO:0004672/GO:0006468;;;;;;GO:0005515;;;;;;;GO:0005524;GO:0004672/GO:0006468;GO:0005524/GO:0004672/GO:0006468;GO:0005515;;;
Vitvi10g00652_t001	XP_010655583.1 probable LRR receptor-like serine/threonine-protein kinase At1g29720 isoform X1	988	5	0	0.9901	Vitis vinifera	1	3	GO:0004672;GO:0005524;GO:0006468	EC:2.7.1	IPR000719;IPR001245;noIPR;IPR032675;IPR021720;noIPR;IPR032675;noIPR;IPR032675;noIPR;noIPR;noIPR;noIPR;IPR017441;IPR008271;IPR000719;noIPR;IPR011009;noIPR	GO:0005524/GO:0004672/GO:0006468;GO:0004672/GO:0006468;;;;;;;;;;;;GO:0005524;GO:0004672/GO:0006468;GO:0005524/GO:0004672/GO:0006468;;;
Vitvi10g00655_t001	XP_010655580.1 probable LRR receptor-like serine/threonine-protein kinase At1g07650 isoform X1	1038	2	0	0.986	Vitis vinifera	1	4	GO:0004672;GO:0005515;GO:0005524;GO:0006468	EC:2.7.1	IPR000719;IPR032675;IPR032675;noIPR;noIPR;noIPR;IPR000719;IPR032675;IPR021720;noIPR;noIPR;noIPR;noIPR;IPR008271;IPR001611;IPR000719;noIPR;IPR011009;noIPR	GO:0005524/GO:0004672/GO:0006468;;;;;;GO:0005524/GO:0004672/GO:0006468;;;;;;;GO:0004672/GO:0006468;GO:0005515;GO:0005524/GO:0004672/GO:0006468;;;
Vitvi10g00656_t001	XP_010655588.1 probable LRR receptor-like serine/threonine-protein kinase At1g29720 isoform X1	1006	4	0	0.9895	Vitis vinifera	1	3	GO:0004672;GO:0005524;GO:0006468	EC:2.7.1	IPR000719;IPR021720;IPR001245;noIPR;noIPR;IPR032675;noIPR;IPR032675;noIPR;noIPR;noIPR;noIPR;IPR008271;IPR017441;IPR000719;noIPR;IPR011009;noIPR	GO:0005524/GO:0004672/GO:0006468;;GO:0004672/GO:0006468;;;;;;;;;;GO:0004672/GO:0006468;GO:0005524;GO:0005524/GO:0004672/GO:0006468;;;
Vitvi10g00656_t002	XP_010655588.1 probable LRR receptor-like serine/threonine-protein kinase At1g29720 isoform X1	1006	4	0	0.9895	Vitis vinifera	1	3	GO:0004672;GO:0005524;GO:0006468	EC:2.7.1	IPR000719;IPR021720;IPR001245;noIPR;noIPR;IPR032675;noIPR;IPR032675;noIPR;noIPR;noIPR;noIPR;IPR008271;IPR017441;IPR000719;noIPR;IPR011009;noIPR	GO:0005524/GO:0004672/GO:0006468;;GO:0004672/GO:0006468;;;;;;;;;;GO:0004672/GO:0006468;GO:0005524;GO:0005524/GO:0004672/GO:0006468;;;
Vitvi10g00657_t001	XP_002264038.2 MACPF domain-containing protein CAD1 isoform X1	577	3	0	0.9977	Vitis vinifera	1	6	GO:0006952;GO:0012501;GO:0016021;GO:0022857;GO:0055085;GO:2000031	EC:7	IPR020864;IPR020864;noIPR;noIPR;noIPR;IPR044663;noIPR;IPR020864	;;;;;GO:0012501/GO:0006952/GO:2000031;;
Vitvi10g00659_t001	XP_019078273.1 protein NRT1/ PTR FAMILY 4.5-like	596	4	0	0.9975	Vitis vinifera	1	3	GO:0016021;GO:0022857;GO:0055085	EC:7	IPR000109;IPR036259;IPR000109;noIPR;IPR036259	GO:0055085/GO:0022857/GO:0016020;;GO:0055085/GO:0022857/GO:0016020;;
Vitvi10g00660_t001	XP_019078049.1 oil body-associated protein 2B	245	2	3e-184	0.9878	Vitis vinifera	1				IPR010686;noIPR;noIPR;noIPR;IPR010686	;;;;
Vitvi10g00661_t001	XP_019077986.1 cyclic phosphodiesterase-like	185	3	1.6e-131	0.9964	Vitis vinifera	1	2	GO:0004113;GO:0009187	EC:3.1.4.37	noIPR;IPR012386;IPR012386;noIPR;IPR012386;IPR009097	;GO:0004112;GO:0004112;;GO:0004112;
Vitvi10g00661_t002	XP_019077986.1 cyclic phosphodiesterase-like	185	3	1.6e-131	0.9964	Vitis vinifera	1	2	GO:0004113;GO:0009187	EC:3.1.4.37	noIPR;IPR012386;IPR012386;noIPR;IPR012386;IPR009097	;GO:0004112;GO:0004112;;GO:0004112;
Vitvi10g00662_t001	XP_002263226.1 serine/threonine-protein kinase STY17	462	2	1.3e-285	0.9957	Vitis vinifera	1	4	GO:0004674;GO:0005515;GO:0005524;GO:0006468	EC:2.7.1	IPR002110;noIPR;IPR020683;noIPR;IPR001245;IPR036770;noIPR;noIPR;noIPR;noIPR;noIPR;IPR002110;IPR000719;noIPR;noIPR;IPR036770;IPR011009	GO:0005515;;;;GO:0004672/GO:0006468;;;;;;;GO:0005515;GO:0005524/GO:0004672/GO:0006468;;;;
Vitvi10g00663_t001	XP_034696942.1agamous-like MADS-box protein MADS1 isoform X1	227	7	8.5e-149	0.9937	Vitis vinifera	0.9956	5	GO:0000978;GO:0000981;GO:0005634;GO:0045944;GO:0046983		noIPR;IPR002100;IPR002100;IPR002100;IPR002487;IPR036879;noIPR;noIPR;IPR002100;IPR002100;IPR002487;IPR033896;IPR036879	;GO:0046983/GO:0003677;GO:0046983/GO:0003677;GO:0046983/GO:0003677;GO:0003700/GO:0005634/GO:0006355;GO:0046983/GO:0003677;;;GO:0046983/GO:0003677;GO:0046983/GO:0003677;GO:0003700/GO:0005634/GO:0006355;GO:0045944/GO:0000977;GO:0046983/GO:0003677
Vitvi10g00663_t002	ABN46892.1 AGAMOUS-like MADS-box protein	226	7	2.9e-150	0.9943	Vitis vinifera	1	5	GO:0000978;GO:0000981;GO:0005634;GO:0045944;GO:0046983		noIPR;IPR002100;IPR002100;IPR036879;IPR002487;IPR002100;noIPR;noIPR;IPR002100;IPR002100;IPR002487;IPR033896;IPR036879	;GO:0046983/GO:0003677;GO:0046983/GO:0003677;GO:0046983/GO:0003677;GO:0003700/GO:0005634/GO:0006355;GO:0046983/GO:0003677;;;GO:0046983/GO:0003677;GO:0046983/GO:0003677;GO:0003700/GO:0005634/GO:0006355;GO:0045944/GO:0000977;GO:0046983/GO:0003677
Vitvi10g00663_t003	XP_034696942.1agamous-like MADS-box protein MADS1 isoform X1	227	7	8.5e-149	0.9937	Vitis vinifera	0.9956	5	GO:0000978;GO:0000981;GO:0005634;GO:0045944;GO:0046983		noIPR;IPR002100;IPR002100;IPR002100;IPR002487;IPR036879;noIPR;noIPR;IPR002100;IPR002100;IPR002487;IPR033896;IPR036879	;GO:0046983/GO:0003677;GO:0046983/GO:0003677;GO:0046983/GO:0003677;GO:0003700/GO:0005634/GO:0006355;GO:0046983/GO:0003677;;;GO:0046983/GO:0003677;GO:0046983/GO:0003677;GO:0003700/GO:0005634/GO:0006355;GO:0045944/GO:0000977;GO:0046983/GO:0003677
Vitvi10g00663_t004	RVW79048.1Floral homeotic protein AGAMOUS	191	1	8e-124	0.9948	Vitis vinifera	0.9948	3	GO:0003700;GO:0005634;GO:0006355		noIPR;IPR002487;noIPR;noIPR;IPR002487	;GO:0003700/GO:0005634/GO:0006355;;;GO:0003700/GO:0005634/GO:0006355
Vitvi10g00663_t005	ABN46892.1 AGAMOUS-like MADS-box protein	226	7	2.9e-150	0.9943	Vitis vinifera	1	5	GO:0000978;GO:0000981;GO:0005634;GO:0045944;GO:0046983		noIPR;IPR002100;IPR002100;IPR036879;IPR002487;IPR002100;noIPR;noIPR;IPR002100;IPR002100;IPR002487;IPR033896;IPR036879	;GO:0046983/GO:0003677;GO:0046983/GO:0003677;GO:0046983/GO:0003677;GO:0003700/GO:0005634/GO:0006355;GO:0046983/GO:0003677;;;GO:0046983/GO:0003677;GO:0046983/GO:0003677;GO:0003700/GO:0005634/GO:0006355;GO:0045944/GO:0000977;GO:0046983/GO:0003677
Vitvi10g00665_t001	XP_019078121.1 GDSL esterase/lipase At1g29670	359	3	1.1e-266	0.9926	Vitis vinifera	1	1	GO:0016788	EC:3.1	IPR001087;IPR036514;noIPR;noIPR;IPR035669;noIPR	GO:0016788;;;;;
Vitvi10g00666_t001	XP_002263997.1 GDSL esterase/lipase At5g45670	360	5	6.2e-269	0.9939	Vitis vinifera	1	2	GO:0016021;GO:0016788	EC:3.1	IPR001087;IPR036514;noIPR;noIPR;IPR035669;noIPR	GO:0016788;;;;;
Vitvi10g04385_t001	RVW21335.1Floral homeotic protein AGAMOUS	97	9	7.3e-42	0.9922	Vitis vinifera	1	5	GO:0000978;GO:0000981;GO:0005634;GO:0045944;GO:0046983
Vitvi10g00667_t001	XP_002268991.2 GDSL esterase/lipase At1g29670	372	4	8.6e-276	0.9952	Vitis vinifera	1	1	GO:0016788	EC:3.1	IPR036514;IPR001087;noIPR;noIPR;IPR035669;noIPR	;GO:0016788;;;;
Vitvi10g00668_t001	XP_002265963.1 GDSL esterase/lipase At1g29670 isoform X1	366	5	4.2e-279	0.9967	Vitis vinifera	1	1	GO:0016788	EC:3.1	IPR001087;IPR036514;noIPR;noIPR;IPR035669	GO:0016788;;;;
Vitvi10g00668_t002	XP_002265963.1 GDSL esterase/lipase At1g29670 isoform X1	366	5	4.2e-279	0.9967	Vitis vinifera	1	1	GO:0016788	EC:3.1	IPR001087;IPR036514;noIPR;noIPR;IPR035669	GO:0016788;;;;
Vitvi10g00669_t001	XP_002266118.1 GDSL esterase/lipase At5g45670	365	3	8.5e-274	0.9791	Vitis vinifera	1	1	GO:0016788	EC:3.1	IPR001087;IPR036514;noIPR;noIPR;IPR035669;noIPR	GO:0016788;;;;;
Vitvi10g04386_t001	XP_019078008.1PREDICTED: uncharacterized protein LOC100265745, partial	259	2	5.9e-146	0.906	Vitis vinifera	0.9819				noIPR;noIPR	;
Vitvi10g01811_t001	XP_034697508.1uncharacterized protein LOC117923359	216	1	2e-145	0.9954	Vitis riparia/Vitis vinifera	0.9954				noIPR
Vitvi10g04387_t001	XP_034698502.1alpha,alpha-trehalose-phosphate synthase [UDP-forming] 1-like isoform X2	409	3	8.2e-295	0.9975	Vitis riparia	0.9975	2	GO:0003824;GO:0005992		IPR001830;noIPR;noIPR;noIPR;IPR001830;IPR001830;noIPR	GO:0005992/GO:0003824;;;;GO:0005992/GO:0003824;GO:0005992/GO:0003824;
Vitvi10g04388_t001	XP_019078304.1 alpha,alpha-trehalose-phosphate synthase [UDP-forming] 1	544	2	0	0.9981	Vitis vinifera	1	2	GO:0003824;GO:0005992		noIPR;IPR003337;IPR001830;noIPR;noIPR;noIPR;IPR001830;noIPR;noIPR;IPR036412	;GO:0005992/GO:0003824;GO:0005992/GO:0003824;;;;GO:0005992/GO:0003824;;;
Vitvi10g01812_t001	XP_002269375.1 subtilisin-like protease SBT5.6	778	5	0	0.9839	Vitis vinifera	1	2	GO:0004252;GO:0006508	EC:3.4.21	IPR015500;noIPR;IPR036852;IPR041469;noIPR;IPR003137;IPR037045;IPR010259;IPR000209;IPR045051;noIPR;IPR023828;noIPR;noIPR;IPR034197;noIPR;IPR036852	;;GO:0004252/GO:0006508;;;;;;GO:0008236/GO:0006508;;;;;;;;GO:0004252/GO:0006508
Vitvi10g01813_t001	XP_010655596.1PREDICTED: uncharacterized protein LOC104880497	115	1	9e-75	1	Vitis vinifera	1				IPR007608;noIPR;noIPR;noIPR	;;;
Vitvi10g00678_t001	XP_010655599.1 exonuclease 1 isoform X2	683	6	0	0.973	Vitis vinifera	0.9819	4	GO:0003677;GO:0006281;GO:0035312;GO:0046872	EC:3.1.11;EC:3.1.15	IPR006084;IPR008918;IPR006086;IPR006085;IPR006086;IPR006085;noIPR;noIPR;IPR032641;IPR006084;IPR019974;IPR037315;IPR044752;IPR036279;IPR029060	;GO:0003824/GO:0003677;GO:0004518;GO:0004518;GO:0004518;GO:0004518;;;GO:0006281/GO:0035312;;GO:0016788;GO:0003677/GO:0035312;GO:0046872;;
Vitvi10g00679_t001	XP_002269484.1 bidirectional sugar transporter SWEET2a	232	2	7.6e-158	0.9978	Vitis vinifera	1	4	GO:0005886;GO:0016021;GO:0034219;GO:0051119	EC:7	noIPR;IPR004316;noIPR;noIPR;noIPR	;GO:0016021;;;
Vitvi10g00680_t001	XP_002267059.3 protein FLX-like 1	307	3	1.9e-193	0.9924	Vitis vinifera	1	1	GO:0030154		noIPR;noIPR;noIPR;noIPR;IPR040353	;;;;
Vitvi10g00681_t001	XP_010655601.1 pentatricopeptide repeat-containing protein At4g18975, chloroplastic isoform X1	277	2	1.7e-206	0.9982	Vitis vinifera	1	1	GO:0005515		IPR011990;noIPR;IPR044646;IPR002885	GO:0005515;;;
Vitvi10g00681_t002	XP_010655601.1 pentatricopeptide repeat-containing protein At4g18975, chloroplastic isoform X1	214	2	5.9e-154	0.9977	Vitis vinifera	1	1	GO:0005515		IPR011990;IPR044646;noIPR	GO:0005515;;
Vitvi10g00681_t003	XP_010655604.1 pentatricopeptide repeat-containing protein At4g18975, chloroplastic isoform X2	163	1	5.6e-113	1	Vitis vinifera/Vitis riparia	1	1	GO:0005515		IPR011990;IPR044646;noIPR	GO:0005515;;
Vitvi10g01814_t001	XP_002269555.2 subtilisin-like protease SBT5.6	777	5	0	0.9817	Vitis vinifera	1	2	GO:0004252;GO:0006508	EC:3.4.21	IPR015500;IPR003137;noIPR;noIPR;IPR041469;IPR010259;IPR037045;IPR036852;IPR000209;noIPR;IPR045051;noIPR;IPR023828;noIPR;noIPR;IPR034197;noIPR;IPR036852;noIPR	;;;;;;;GO:0004252/GO:0006508;GO:0008236/GO:0006508;;;;;;;;;GO:0004252/GO:0006508;
Vitvi10g04389_t001	XP_010655611.1 transcription factor GTE9 isoform X6	573	12	0	0.9745	Vitis vinifera	1	1	GO:0005515		noIPR;IPR001487;IPR001487;IPR036427;IPR001487;noIPR;noIPR;noIPR;IPR001487;IPR037377;IPR036427	;GO:0005515;GO:0005515;GO:0005515;GO:0005515;;;;GO:0005515;;GO:0005515
Vitvi10g04389_t002	XP_010655611.1 transcription factor GTE9 isoform X6	568	12	0	0.9716	Vitis vinifera	0.9913	1	GO:0005515		noIPR;IPR001487;IPR001487;IPR036427;IPR001487;noIPR;noIPR;noIPR;IPR001487;IPR037377;IPR036427	;GO:0005515;GO:0005515;GO:0005515;GO:0005515;;;;GO:0005515;;GO:0005515
Vitvi10g04389_t003	XP_010655611.1 transcription factor GTE9 isoform X6	570	12	0	0.9728	Vitis vinifera	0.9948	1	GO:0005515		noIPR;IPR001487;IPR001487;IPR036427;IPR001487;noIPR;noIPR;noIPR;IPR001487;IPR037377;IPR036427	;GO:0005515;GO:0005515;GO:0005515;GO:0005515;;;;GO:0005515;;GO:0005515
Vitvi10g04389_t004	XP_010655611.1 transcription factor GTE9 isoform X6	571	12	0	0.9734	Vitis vinifera	0.9965	1	GO:0005515		noIPR;IPR001487;IPR001487;IPR036427;IPR001487;noIPR;noIPR;noIPR;IPR001487;IPR037377;IPR036427	;GO:0005515;GO:0005515;GO:0005515;GO:0005515;;;;GO:0005515;;GO:0005515
Vitvi10g04389_t005	XP_010655611.1 transcription factor GTE9 isoform X6	568	12	0	0.9716	Vitis vinifera	0.9913	1	GO:0005515		noIPR;IPR001487;IPR001487;IPR036427;IPR001487;noIPR;noIPR;noIPR;IPR001487;IPR037377;IPR036427	;GO:0005515;GO:0005515;GO:0005515;GO:0005515;;;;GO:0005515;;GO:0005515
Vitvi10g00684_t001	XP_002267488.1 eukaryotic translation initiation factor 4E-1 isoform X2	236	2	6.6e-179	0.9958	Vitis vinifera	1	5	GO:0000340;GO:0003743;GO:0006413;GO:0006417;GO:0016281		IPR001040;IPR023398;noIPR;noIPR;IPR001040;noIPR;IPR019770;IPR023398	GO:0006413/GO:0003743/GO:0003723;;;;GO:0006413/GO:0003743/GO:0003723;;GO:0006413/GO:0005737/GO:0003723/GO:0003743;
Vitvi10g00685_t001	XP_002269718.1 protein SRG1	362	2	6.4e-263	0.9986	Vitis vinifera	1				IPR044861;IPR026992;IPR027443;noIPR;noIPR;IPR005123;noIPR	;;;;;;
Vitvi10g00687_t001	XP_002269890.1 protein SRG1	364	3	1.3e-265	0.9927	Vitis vinifera	1	2	GO:0016491;GO:0046872	EC:1	IPR026992;IPR044861;IPR027443;noIPR;noIPR;IPR005123;noIPR	;;;;;;
Vitvi10g04390_t001	XP_010655797.1 protein SRG1-like	164	20	9.9e-97	0.945	Vitis vinifera	0.9494	2	GO:0016491;GO:0046872	EC:1	IPR026992;IPR044861;IPR027443;noIPR;noIPR;noIPR	;;;;;
Vitvi10g04391_t001	RVX10706.1hypothetical protein CK203_018120	54	1	1.4e-30	1	Vitis vinifera	1
Vitvi10g01817_t001	XP_002270036.1 protein SRG1	359	7	6.6e-259	0.9948	Vitis vinifera	1	2	GO:0016491;GO:0046872	EC:1	IPR027443;IPR026992;IPR044861;noIPR;noIPR;IPR005123;noIPR	;;;;;;
Vitvi10g04392_t001	XP_019078065.1 protein SRG1	362	18	3.2e-256	0.9659	Vitis vinifera	0.9862	2	GO:0016491;GO:0046872	EC:1	IPR026992;IPR044861;IPR027443;noIPR;noIPR;IPR005123;noIPR	;;;;;;
Vitvi10g04393_t001	XP_010655797.1 protein SRG1-like	101	2	5.3e-62	0.9676	Vitis vinifera	0.9352				IPR027443;noIPR;noIPR;noIPR	;;;
Vitvi10g01821_t001	XP_002270288.1 protein SRG1	359	7	9.3e-259	0.9936	Vitis vinifera	1	2	GO:0016491;GO:0046872	EC:1	IPR044861;IPR026992;IPR027443;noIPR;noIPR;IPR005123;noIPR	;;;;;;
Vitvi10g01822_t001	XP_003632980.1 protein SRG1	363	6	4.8e-263	0.9817	Vitis vinifera	1	2	GO:0016491;GO:0046872	EC:1	IPR044861;IPR026992;IPR027443;noIPR;noIPR;IPR005123;noIPR	;;;;;;
Vitvi10g04394_t001	RVX10647.1hypothetical protein CK203_018132	120	3	2.7e-68	0.9752	Vitis vinifera	0.9464
Vitvi10g04395_t001	RVW58111.1hypothetical protein CK203_111122	102	3	3.7e-62	0.8803	Vitis vinifera	1
Vitvi10g01823_t001	XP_002270474.1 protein SRG1	355	11	3.1e-255	0.9857	Vitis vinifera	1	2	GO:0016491;GO:0046872	EC:1	IPR026992;IPR044861;IPR027443;noIPR;noIPR;IPR005123;noIPR	;;;;;;
Vitvi10g01824_t001	XP_002270514.1 protein SRG1	359	7	3.8e-258	0.994	Vitis vinifera	1	2	GO:0016491;GO:0046872	EC:1	IPR026992;IPR044861;IPR027443;noIPR;noIPR;IPR005123;noIPR	;;;;;;
Vitvi10g04396_t001	CBI30789.3unnamed protein product, partial	92	1	1.2e-25	0.9038	Vitis vinifera	0.9038				noIPR;noIPR;noIPR	;;
Vitvi10g04397_t001	RVW42761.1hypothetical protein CK203_079960	157	4	6.6e-15	0.9223	Vitis vinifera	0.9362
Vitvi10g00689_t001	XP_002270646.2 protein SRG1	365	2	2e-255	0.9754	Vitis vinifera	0.9836	2	GO:0016491;GO:0046872	EC:1	IPR044861;IPR027443;IPR026992;noIPR;noIPR;IPR005123;noIPR	;;;;;;
Vitvi10g04398_t001	XP_002270646.2 protein SRG1	203	3	1.4e-108	0.5488	Vitis vinifera	0.5525				IPR026992;IPR027443;IPR027443;noIPR;noIPR;noIPR;noIPR;noIPR;noIPR	;;;;;;;;
Vitvi10g01828_t001	XP_002271009.1 protein SRG1	362	2	7.4e-262	1	Vitis vinifera	1	2	GO:0016491;GO:0046872	EC:1	IPR044861;IPR027443;IPR026992;noIPR;noIPR;IPR005123;noIPR	;;;;;;
Vitvi10g01829_t001	RVX10773.1Protein SRG1	362	9	1.5e-261	0.9857	Vitis vinifera	1	2	GO:0016491;GO:0046872	EC:1	IPR026992;IPR044861;IPR027443;noIPR;noIPR;IPR005123;noIPR	;;;;;;
Vitvi10g01831_t001	XP_002268794.1 protein SRG1	369	4	5.3e-268	0.9885	Vitis vinifera	1	2	GO:0016491;GO:0046872	EC:1	IPR026992;IPR027443;IPR044861;noIPR;noIPR;IPR005123;noIPR	;;;;;;
Vitvi10g00693_t001	XP_002268708.1 xyloglucan endotransglucosylase/hydrolase 2	273	2	3.3e-207	0.9982	Vitis vinifera	1	6	GO:0004553;GO:0005618;GO:0010411;GO:0016762;GO:0042546;GO:0048046	EC:2.4.1.207;EC:3.2.1	IPR008264;IPR010713;IPR000757;noIPR;IPR016455;IPR044791;noIPR;IPR008263;IPR000757;IPR016455;IPR013320	GO:0004553/GO:0005975;GO:0048046/GO:0006073/GO:0005618/GO:0016762;GO:0004553/GO:0005975;;GO:0016762/GO:0042546/GO:0010411;GO:0004553;;GO:0004553/GO:0005975;GO:0004553/GO:0005975;GO:0016762/GO:0042546/GO:0010411;
Vitvi10g04399_t001	RVW47412.1hypothetical protein CK203_098396	113	1	3.5e-64	0.9174	Vitis vinifera	0.9174				noIPR
Vitvi10g00694_t001	XP_002269087.1 protein SRG1	366	2	1.4e-268	0.9877	Vitis vinifera	1	2	GO:0016491;GO:0046872	EC:1	IPR044861;IPR026992;IPR027443;noIPR;noIPR;IPR005123;noIPR	;;;;;;
Vitvi10g01832_t001	CBI30798.3unnamed protein product, partial	69	1	3.6e-44	1	Vitis vinifera	1				IPR026992;IPR027443;noIPR;noIPR;noIPR	;;;;
Vitvi10g00697_t001	RVX10787.1Protein SRG1	214	4	5.7e-142	0.9815	Vitis vinifera	0.986	2	GO:0016491;GO:0046872	EC:1	IPR044861;IPR027443;noIPR;noIPR;IPR005123;noIPR	;;;;;
Vitvi10g01833_t001	XP_002270973.2 xyloglucan endotransglucosylase/hydrolase 2	290	1	6e-218	1	Vitis vinifera	1	6	GO:0004553;GO:0005618;GO:0010411;GO:0016762;GO:0042546;GO:0048046	EC:2.4.1.207;EC:3.2.1	IPR000757;IPR016455;noIPR;IPR010713;noIPR;IPR044791;IPR008263;IPR000757;IPR016455;IPR013320	GO:0004553/GO:0005975;GO:0016762/GO:0042546/GO:0010411;;GO:0048046/GO:0006073/GO:0005618/GO:0016762;;GO:0004553;GO:0004553/GO:0005975;GO:0004553/GO:0005975;GO:0016762/GO:0042546/GO:0010411;
Vitvi10g04400_t001	CBI30801.3unnamed protein product, partial	67	1	4.3e-33	1	Vitis vinifera	1	2	GO:0016491;GO:0046872	EC:1
Vitvi10g04401_t001	CAN59755.1hypothetical protein VITISV_034567	84	1	9.9e-48	1	Vitis vinifera	1	5	GO:0003676;GO:0015074;GO:0015079;GO:0016020;GO:0071805	EC:7	IPR003855;noIPR	GO:0071805/GO:0015079/GO:0016020;
Vitvi10g04402_t001	CBI30803.3unnamed protein product, partial	181	1	6.8e-129	1	Vitis vinifera	1				IPR026992;IPR027443;noIPR;noIPR;noIPR	;;;;
Vitvi10g04403_t001	RVX10890.1THO complex subunit 2	647	2	0	0.9838	Vitis vinifera	1	3	GO:0000347;GO:0006397;GO:0006406		noIPR;IPR021418;noIPR;noIPR;noIPR;noIPR;noIPR;noIPR;IPR040007	;;;;;;;;GO:0006397/GO:0006406/GO:0000347
Vitvi10g04404_t001	---NA---	153									noIPR;noIPR;noIPR	;;
Vitvi10g00702_t001	XP_002271185.1 ABC transporter B family member 9 isoform X1	1270	5	0	0.9876	Vitis vinifera	1	4	GO:0005524;GO:0016021;GO:0055085;GO:0140359	EC:7	IPR003593;IPR027417;IPR027417;IPR003439;IPR036640;IPR011527;IPR003439;noIPR;noIPR;IPR017871;IPR017871;IPR003439;IPR011527;IPR011527;IPR003439;noIPR;noIPR;noIPR;noIPR;IPR036640;IPR036640;IPR027417;IPR027417	;;;GO:0005524;GO:0016021/GO:0005524;GO:0016021/GO:0055085/GO:0005524/GO:0140359;GO:0005524;;;GO:0005524;GO:0005524;GO:0005524;GO:0016021/GO:0055085/GO:0005524/GO:0140359;GO:0016021/GO:0055085/GO:0005524/GO:0140359;GO:0005524;;;;;GO:0016021/GO:0005524;GO:0016021/GO:0005524;;
Vitvi10g04405_t001	RVX10835.1ABC transporter B family member 9	84	2	4.8e-28	0.9649	Vitis vinifera	0.9649	4	GO:0005524;GO:0016021;GO:0042626;GO:0055085	EC:7
Vitvi10g04406_t001	RVX10835.1ABC transporter B family member 9	140	3	2e-73	1	Vitis vinifera	1	4	GO:0005524;GO:0016021;GO:0055085;GO:0140359	EC:7	IPR011527;IPR036640;noIPR;noIPR;IPR011527;IPR036640	GO:0016021/GO:0055085/GO:0005524/GO:0140359;GO:0016021/GO:0005524;;;GO:0016021/GO:0055085/GO:0005524/GO:0140359;GO:0016021/GO:0005524
Vitvi10g00703_t001	RVX10835.1ABC transporter B family member 9	594	3	0	0.8673	Vitis vinifera	0.8873	4	GO:0005524;GO:0016021;GO:0055085;GO:0140359	EC:7	noIPR;IPR003593;IPR011527;IPR027417;IPR003439;IPR036640;noIPR;noIPR;noIPR;IPR011527;IPR003439;noIPR;noIPR;IPR036640;IPR027417	;;GO:0016021/GO:0055085/GO:0005524/GO:0140359;;GO:0005524;GO:0016021/GO:0005524;;;;GO:0016021/GO:0055085/GO:0005524/GO:0140359;GO:0005524;;;GO:0016021/GO:0005524;
Vitvi10g00705_t001	XP_019078066.1 ABC transporter B family member 9-like	1263	3	0	0.9743	Vitis vinifera	0.9875	4	GO:0005524;GO:0016021;GO:0055085;GO:0140359	EC:7	IPR003593;IPR036640;IPR011527;IPR003439;IPR027417;IPR036640;IPR003439;noIPR;noIPR;noIPR;IPR017871;IPR017871;IPR003439;IPR003439;IPR011527;IPR011527;noIPR;noIPR;noIPR;noIPR;IPR027417;IPR036640;IPR036640;IPR027417	;GO:0016021/GO:0005524;GO:0016021/GO:0055085/GO:0005524/GO:0140359;GO:0005524;;GO:0016021/GO:0005524;GO:0005524;;;;GO:0005524;GO:0005524;GO:0005524;GO:0005524;GO:0016021/GO:0055085/GO:0005524/GO:0140359;GO:0016021/GO:0055085/GO:0005524/GO:0140359;;;;;;GO:0016021/GO:0005524;GO:0016021/GO:0005524;
Vitvi10g00706_t001	XP_002271305.1 ABC transporter B family member 9-like	1265	3	0	0.985	Vitis vinifera	1	4	GO:0005524;GO:0016021;GO:0055085;GO:0140359	EC:7	IPR003593;IPR003439;IPR003439;IPR027417;IPR036640;IPR011527;IPR027417;noIPR;noIPR;IPR017871;IPR017871;IPR003439;IPR003439;IPR011527;IPR011527;noIPR;noIPR;noIPR;noIPR;IPR036640;IPR036640;IPR027417;IPR027417	;GO:0005524;GO:0005524;;GO:0016021/GO:0005524;GO:0016021/GO:0055085/GO:0005524/GO:0140359;;;;GO:0005524;GO:0005524;GO:0005524;GO:0005524;GO:0016021/GO:0055085/GO:0005524/GO:0140359;GO:0016021/GO:0055085/GO:0005524/GO:0140359;;;;;GO:0016021/GO:0005524;GO:0016021/GO:0005524;;
Vitvi10g00707_t001	XP_002272365.1 SH3 domain-containing protein 3	348	2	1.2e-237	0.9957	Vitis vinifera	1	1	GO:0005515		noIPR;noIPR;noIPR;noIPR;IPR001452;noIPR;IPR001452;IPR027267;noIPR;noIPR;IPR001452;IPR027267;IPR036028	;;;;GO:0005515;;GO:0005515;;;;GO:0005515;;GO:0005515
Vitvi10g00708_t001	XP_034690526.1RNA-binding KH domain-containing protein RCF3-like isoform X1	432	9	4.4e-35	0.69	Vitis riparia	0.695	5	GO:0003723;GO:0005524;GO:0006364;GO:0008168;GO:0016887	EC:2.1.1	IPR000692;IPR000692;IPR000692;noIPR;IPR013126;noIPR;IPR036612;noIPR;noIPR;noIPR;IPR043129	GO:0006364/GO:0008168/GO:0003723;GO:0006364/GO:0008168/GO:0003723;GO:0006364/GO:0008168/GO:0003723;;GO:0016887/GO:0005524;;GO:0003723;;;;
Vitvi10g00709_t001	XP_002271436.2 enolase-phosphatase E1	432	2	4.6e-201	0.9838	Vitis vinifera	1				noIPR;noIPR;noIPR;noIPR;noIPR;noIPR;noIPR;noIPR	;;;;;;;
Vitvi10g00709_t002	XP_002271436.2 enolase-phosphatase E1	406	2	1e-184	1	Vitis vinifera	1				noIPR;noIPR;noIPR;noIPR;noIPR;noIPR	;;;;;
Vitvi10g01835_t001	XP_034697760.1membrane protein PM19L-like	159	2	4.8e-107	0.9906	Vitis vinifera	1	1	GO:0016021		IPR008390;IPR008390;noIPR	;;
Vitvi10g04407_t001	RVW47354.1hypothetical protein CK203_090314	213	1	3.9e-139	0.9671	Vitis vinifera	0.9671	1	GO:0016021
Vitvi10g00711_t001	XP_002272690.3 pentatricopeptide repeat-containing protein At5g46460, mitochondrial	707	2	0	0.9936	Vitis vinifera	1	2	GO:0005515;GO:0008270		IPR032867;IPR002885;IPR002885;IPR011990;IPR011990;IPR002885;IPR002885;IPR011990;noIPR;noIPR;noIPR;noIPR;IPR002885;IPR002885;IPR002885;IPR002885;IPR002885	GO:0008270;;;GO:0005515;GO:0005515;;;GO:0005515;;;;;;;;;
Vitvi10g00712_t001	XP_002272873.1 60S ribosomal protein L32-1	133	20	6.4e-88	0.9921	Vitis vinifera/Vitis riparia	1	5	GO:0003735;GO:0004842;GO:0006412;GO:0016567;GO:0022625	EC:2	IPR001515;IPR001515;IPR001515;noIPR;IPR001515;IPR036351	GO:0006412/GO:0005840/GO:0003735;GO:0006412/GO:0005840/GO:0003735;GO:0006412/GO:0005840/GO:0003735;;GO:0006412/GO:0005840/GO:0003735;
Vitvi10g00712_t002	XP_002272873.1 60S ribosomal protein L32-1	133	20	6.4e-88	0.9921	Vitis vinifera/Vitis riparia	1	5	GO:0003735;GO:0004842;GO:0006412;GO:0016567;GO:0022625	EC:2	IPR001515;IPR001515;IPR001515;noIPR;IPR001515;IPR036351	GO:0006412/GO:0005840/GO:0003735;GO:0006412/GO:0005840/GO:0003735;GO:0006412/GO:0005840/GO:0003735;;GO:0006412/GO:0005840/GO:0003735;
Vitvi10g00713_t001	XP_002271571.1PREDICTED: uncharacterized protein LOC100251997	665	2	0	0.9962	Vitis vinifera	1	7	GO:0003729;GO:0003977;GO:0005840;GO:0006048;GO:0006364;GO:0009507;GO:0043022	EC:2.7.7.23	noIPR;IPR027275;IPR011961;IPR002676;IPR029044;noIPR;IPR036976;noIPR;IPR039741;IPR011961;IPR011033;IPR029044;IPR009000	;;GO:0043022/GO:0006364/GO:0005840;GO:0006364;;;GO:0006364;;;GO:0043022/GO:0006364/GO:0005840;;;
Vitvi10g00714_t001	XP_002271605.1 protein MEI2-like 5	860	3	0	0.9891	Vitis vinifera	1	2	GO:0003723;GO:0051321		IPR000504;IPR000504;IPR012677;IPR012677;IPR007201;noIPR;noIPR;noIPR;IPR000504;IPR000504;IPR034454;noIPR;IPR034453;IPR035979;IPR035979	GO:0003676;GO:0003676;;;;;;;GO:0003676;GO:0003676;;;;GO:0003676;GO:0003676
Vitvi10g00714_t002	XP_002271605.1 protein MEI2-like 5	860	3	0	0.9891	Vitis vinifera	1	2	GO:0003723;GO:0051321		IPR000504;IPR000504;IPR012677;IPR012677;IPR007201;noIPR;noIPR;noIPR;IPR000504;IPR000504;IPR034454;noIPR;IPR034453;IPR035979;IPR035979	GO:0003676;GO:0003676;;;;;;;GO:0003676;GO:0003676;;;;GO:0003676;GO:0003676
Vitvi10g00714_t003	XP_002271605.1 protein MEI2-like 5	770	3	0	0.9877	Vitis vinifera	1	2	GO:0003723;GO:0051321		IPR000504;IPR000504;IPR012677;IPR007201;IPR012677;noIPR;noIPR;noIPR;IPR000504;IPR000504;noIPR;IPR034453;IPR035979;IPR035979	GO:0003676;GO:0003676;;;;;;;GO:0003676;GO:0003676;;;GO:0003676;GO:0003676
Vitvi10g00714_t004	XP_002271605.1 protein MEI2-like 5	770	3	0	0.9877	Vitis vinifera	1	2	GO:0003723;GO:0051321		IPR000504;IPR000504;IPR012677;IPR007201;IPR012677;noIPR;noIPR;noIPR;IPR000504;IPR000504;noIPR;IPR034453;IPR035979;IPR035979	GO:0003676;GO:0003676;;;;;;;GO:0003676;GO:0003676;;;GO:0003676;GO:0003676
Vitvi10g01589_t001	XP_010655621.2 agamous-like MADS-box protein AGL62	215	4	1.9e-140	0.964	Vitis vinifera	1	3	GO:0000977;GO:0045944;GO:0046983		noIPR;IPR002100;IPR002100;IPR036879;IPR002100;noIPR;noIPR;IPR002100;IPR033896;IPR036879	;GO:0046983/GO:0003677;GO:0046983/GO:0003677;GO:0046983/GO:0003677;GO:0046983/GO:0003677;;;GO:0046983/GO:0003677;GO:0045944/GO:0000977;GO:0046983/GO:0003677
Vitvi10g00715_t001	XP_002271671.1 phytochrome E	1124	3	0	0.9932	Vitis vinifera	1	9	GO:0000155;GO:0000160;GO:0006355;GO:0009584;GO:0009585;GO:0009881;GO:0017006;GO:0018298;GO:0042803	EC:2.7.3;EC:2.7.13.3	IPR001294;IPR003018;IPR003594;IPR000014;IPR003661;IPR012129;noIPR;noIPR;IPR000014;IPR003594;IPR013515;IPR013654;IPR003661;IPR013767;IPR043150;IPR003018;IPR036890;IPR029016;noIPR;noIPR;noIPR;noIPR;noIPR;IPR013516;IPR005467;IPR016132;IPR000014;IPR000700;IPR000014;IPR003661;IPR044767;IPR000014;IPR000014;noIPR;IPR035965;noIPR;IPR036890;IPR035965;IPR035965	GO:0009584/GO:0006355;GO:0005515;;;GO:0000155/GO:0007165;GO:0042803/GO:0017006/GO:0009881/GO:0006355/GO:0009585;;;;;GO:0018298/GO:0009584/GO:0006355;GO:0006355;GO:0000155/GO:0007165;GO:0006355;;GO:0005515;;;;;;;;GO:0018298;;GO:0018298;;;;GO:0000155/GO:0007165;;;;;;;;;
Vitvi10g04408_t001	---NA---	74
Vitvi10g00716_t001	XP_002271705.1PREDICTED: uncharacterized protein LOC100258847 isoform X1	484	3	0	0.9959	Vitis vinifera	1	2	GO:0004721;GO:0006470	EC:3.1.3	IPR004274;IPR023214;IPR004274;IPR011948;noIPR;noIPR;IPR004274;noIPR;IPR036412	;;;GO:0016791;;;;;
Vitvi10g00717_t001	XP_010655627.1PREDICTED: uncharacterized protein LOC100243465 isoform X2	1195	2	0	0.9983	Vitis vinifera	1	5	GO:0000243;GO:0000395;GO:0005515;GO:0005685;GO:0071004		noIPR;noIPR;IPR003107;IPR011990;IPR011990;noIPR;noIPR;noIPR;noIPR;noIPR;noIPR;noIPR;noIPR;IPR011990;IPR011990	;;GO:0006396;GO:0005515;GO:0005515;;;;;;;;;GO:0005515;GO:0005515
Vitvi10g00719_t001	XP_002273366.1 cold-regulated 413 inner membrane protein 1, chloroplastic	210	3	2e-140	0.9889	Vitis vinifera	1	1	GO:0016021		IPR008892;noIPR;IPR008892	GO:0016021;;GO:0016021
Vitvi10g00720_t001	XP_010655628.1 PLASMODESMATA CALLOSE-BINDING PROTEIN 2 isoform X2	292	2	4.4e-157	0.9706	Vitis vinifera	1				noIPR;IPR012946;noIPR;IPR012946;noIPR;noIPR;noIPR;IPR044788;noIPR	;;;;;;;;
Vitvi10g01837_t001	XP_002271932.1 carboxyl-terminal-processing peptidase 1, chloroplastic isoform X1	462	3	0	0.9986	Vitis vinifera	1	4	GO:0004175;GO:0005515;GO:0006508;GO:0008236	EC:3.4	IPR001478;IPR005151;IPR005151;noIPR;noIPR;IPR036034;IPR004447;IPR041489;noIPR;noIPR;noIPR;IPR001478;IPR004447;noIPR;IPR029045;IPR036034	GO:0005515;GO:0008236/GO:0006508;GO:0008236/GO:0006508;;;GO:0005515;GO:0008236/GO:0006508;;;;;GO:0005515;GO:0008236/GO:0006508;;;GO:0005515
Vitvi10g00722_t001	XP_010655630.1 protein lingerer isoform X1	886	5	0	0.99	Vitis vinifera	1	1	GO:0005515		IPR009719;noIPR;noIPR;noIPR;noIPR;noIPR;noIPR;noIPR;noIPR;noIPR;IPR009060	;;;;;;;;;;GO:0005515
Vitvi10g00722_t002	XP_010655630.1 protein lingerer isoform X1	885	5	0	0.9893	Vitis vinifera	0.9989	1	GO:0005515		IPR009719;noIPR;noIPR;noIPR;noIPR;noIPR;noIPR;noIPR;noIPR;noIPR;IPR009060	;;;;;;;;;;GO:0005515
Vitvi10g00723_t001	XP_002272002.2PREDICTED: uncharacterized protein LOC100267497	570	1	0	1	Vitis vinifera	1	4	GO:0016020;GO:0030001;GO:0046873;GO:0055085	EC:7	noIPR;IPR002523;noIPR;noIPR;noIPR;noIPR;noIPR;noIPR	;GO:0046873/GO:0016020/GO:0055085/GO:0030001;;;;;;
Vitvi10g00723_t002	XP_002272002.2PREDICTED: uncharacterized protein LOC100267497	570	1	0	1	Vitis vinifera	1	4	GO:0016020;GO:0030001;GO:0046873;GO:0055085	EC:7	noIPR;IPR002523;noIPR;noIPR;noIPR;noIPR;noIPR;noIPR	;GO:0046873/GO:0016020/GO:0055085/GO:0030001;;;;;;
Vitvi10g00723_t003	XP_002272002.2PREDICTED: uncharacterized protein LOC100267497	570	1	0	1	Vitis vinifera	1	4	GO:0016020;GO:0030001;GO:0046873;GO:0055085	EC:7	noIPR;IPR002523;noIPR;noIPR;noIPR;noIPR;noIPR;noIPR	;GO:0046873/GO:0016020/GO:0055085/GO:0030001;;;;;;
Vitvi10g00723_t004	XP_002272002.2PREDICTED: uncharacterized protein LOC100267497	570	1	0	1	Vitis vinifera	1	4	GO:0016020;GO:0030001;GO:0046873;GO:0055085	EC:7	noIPR;IPR002523;noIPR;noIPR;noIPR;noIPR;noIPR;noIPR	;GO:0046873/GO:0016020/GO:0055085/GO:0030001;;;;;;
Vitvi10g00724_t001	XP_002273766.1 coatomer subunit zeta-1	177	7	5.8e-119	0.9919	Vitis vinifera	1	5	GO:0000139;GO:0006886;GO:0006890;GO:0006891;GO:0030126		IPR022775;noIPR;IPR039652;noIPR;noIPR;IPR011012	;;GO:0030126/GO:0006890;;;
Vitvi10g00726_t001	XP_034697924.1pterin-4-alpha-carbinolamine dehydratase 2, mitochondrial	176	2	6.1e-125	0.9858	Vitis vinifera	1	3	GO:0005739;GO:0006729;GO:0008124	EC:4.2.1.96	IPR001533;IPR036428;IPR001533;noIPR;noIPR;IPR036428	GO:0008124/GO:0006729;GO:0008124/GO:0006729;GO:0008124/GO:0006729;;;GO:0008124/GO:0006729
Vitvi10g00726_t002	RVX10658.1putative pterin-4-alpha-carbinolamine dehydratase	124	5	1.1e-84	0.9968	Vitis vinifera	1	3	GO:0005739;GO:0006729;GO:0008124	EC:4.2.1.96	IPR036428;IPR001533;noIPR;IPR001533;noIPR;IPR036428	GO:0008124/GO:0006729;GO:0008124/GO:0006729;;GO:0008124/GO:0006729;;GO:0008124/GO:0006729
Vitvi10g00726_t003	RVX10658.1putative pterin-4-alpha-carbinolamine dehydratase	105	5	5.8e-71	0.9981	Vitis vinifera	1	3	GO:0005739;GO:0006729;GO:0008124	EC:4.2.1.96	IPR036428;IPR001533;IPR001533;noIPR;noIPR;IPR036428	GO:0008124/GO:0006729;GO:0008124/GO:0006729;GO:0008124/GO:0006729;;;GO:0008124/GO:0006729
Vitvi10g00726_t004	RVX10658.1putative pterin-4-alpha-carbinolamine dehydratase	105	5	5.8e-71	0.9981	Vitis vinifera	1	3	GO:0005739;GO:0006729;GO:0008124	EC:4.2.1.96	IPR036428;IPR001533;IPR001533;noIPR;noIPR;IPR036428	GO:0008124/GO:0006729;GO:0008124/GO:0006729;GO:0008124/GO:0006729;;;GO:0008124/GO:0006729
Vitvi10g00727_t001	XP_002273992.1PREDICTED: uncharacterized protein LOC100250442	366	4	1e-261	0.998	Vitis vinifera	1	3	GO:0008168;GO:0016021;GO:0032259	EC:2.1.1	noIPR;IPR004159;noIPR;noIPR;IPR029063	;GO:0008168;;;
Vitvi10g00728_t001	XP_002274043.1 DNA-binding protein DDB_G0278111	128	3	2e-75	0.9922	Vitis vinifera	1	1	GO:0003677		IPR002836;IPR002836;IPR036883;noIPR;noIPR;IPR002836;IPR036883	GO:0003677;GO:0003677;GO:0003677;;;GO:0003677;GO:0003677
Vitvi10g04409_t001	XP_010655635.1 two-pore potassium channel 3	421	2	9.3e-279	0.9988	Vitis vinifera	1	3	GO:0005267;GO:0016020;GO:0071805	EC:7	IPR003280;IPR013099;noIPR;noIPR;noIPR;noIPR;noIPR;IPR003280;IPR018247;noIPR;IPR011992;noIPR	GO:0071805/GO:0005267/GO:0016020;;;;;;;GO:0071805/GO:0005267/GO:0016020;;;;
Vitvi10g04409_t002	XP_010655635.1 two-pore potassium channel 3	421	2	9.3e-279	0.9988	Vitis vinifera	1	3	GO:0005267;GO:0016020;GO:0071805	EC:7	IPR003280;IPR013099;noIPR;noIPR;noIPR;noIPR;noIPR;IPR003280;IPR018247;noIPR;IPR011992;noIPR	GO:0071805/GO:0005267/GO:0016020;;;;;;;GO:0071805/GO:0005267/GO:0016020;;;;
Vitvi10g00732_t001	XP_002272089.1 probable WRKY transcription factor 71	319	2	6.6e-230	1	Vitis vinifera	1	4	GO:0003700;GO:0005634;GO:0006355;GO:0043565		IPR003657;IPR036576;IPR003657;noIPR;noIPR;noIPR;noIPR;IPR044810;IPR003657;IPR036576	GO:0003700/GO:0043565/GO:0006355;GO:0003700/GO:0043565/GO:0006355;GO:0003700/GO:0043565/GO:0006355;;;;;GO:0003700;GO:0003700/GO:0043565/GO:0006355;GO:0003700/GO:0043565/GO:0006355
Vitvi10g00733_t001	XP_002272126.2 protein REDUCED WALL ACETYLATION 4	596	2	0	0.9982	Vitis vinifera	1				IPR012419;noIPR;noIPR	;;
Vitvi10g00734_t001	XP_002274345.2 probable purine permease 10	385	3	5.3e-269	0.9939	Vitis vinifera	1	5	GO:0005345;GO:0015211;GO:0015860;GO:0016021;GO:1904823	EC:7	noIPR;noIPR;IPR030182;noIPR;noIPR	;;GO:0016021/GO:0015211;;
Vitvi10g04410_t001	CBI30830.3unnamed protein product, partial	130	1	4.3e-75	1	Vitis vinifera	1				IPR012419;noIPR;noIPR	;;
Vitvi10g00736_t001	XP_002272204.1 probable purine permease 10 isoform X1	370	4	4.3e-256	0.9932	Vitis vinifera	1	5	GO:0005345;GO:0015211;GO:0015860;GO:0016021;GO:1904823	EC:7	noIPR;IPR030182;noIPR	;GO:0016021/GO:0015211;
Vitvi10g00737_t001	RVX10723.1Purine permease 21	108	1	2.7e-63	1	Vitis vinifera	1	5	GO:0005345;GO:0015211;GO:0015860;GO:0016021;GO:1904823	EC:7	noIPR;noIPR;IPR030182	;;GO:0016021/GO:0015211
Vitvi10g00738_t001	XP_010655636.1 UDP-N-acetylglucosamine transferase subunit ALG14	233	3	2.6e-161	0.9686	Vitis vinifera	1	5	GO:0006488;GO:0016021;GO:0016740;GO:0031965;GO:0043541	EC:2	noIPR;IPR013969;IPR013969	;GO:0006488;GO:0006488
Vitvi10g01838_t001	CBI30833.3unnamed protein product, partial	490	1	0	1	Vitis vinifera	1	2	GO:0005515;GO:0008270		IPR002885;IPR032867;IPR011990;IPR002885;IPR002885;noIPR;noIPR;IPR002885;IPR002885;IPR002885;IPR011990	;GO:0008270;GO:0005515;;;;;;;;GO:0005515
Vitvi10g00739_t001	XP_002274716.1 probable starch synthase 4, chloroplastic/amyloplastic	1011	2	0	0.997	Vitis vinifera	1	4	GO:0004373;GO:0009011;GO:0009507;GO:0019252	EC:2.4.1.21;EC:2.4.1.11	noIPR;noIPR;noIPR;noIPR;noIPR;noIPR;IPR013534;IPR001296;IPR011835;noIPR;noIPR;noIPR;noIPR;noIPR;IPR011835;noIPR;noIPR	;;;;;;;GO:0016757;GO:0004373;;;;;;GO:0004373;;
Vitvi10g00739_t002	XP_002274716.1 probable starch synthase 4, chloroplastic/amyloplastic	930	2	0	0.9962	Vitis vinifera	0.9989	4	GO:0004373;GO:0009011;GO:0009507;GO:0019252	EC:2.4.1.21;EC:2.4.1.11	noIPR;noIPR;noIPR;noIPR;noIPR;noIPR;IPR013534;noIPR;IPR011835;noIPR;noIPR;noIPR;noIPR;noIPR;noIPR	;;;;;;;;GO:0004373;;;;;;
Vitvi10g01839_t001	XP_003633024.1 chlorophyll a-b binding protein of LHCII type 1	264	6	5.9e-196	0.9848	Vitis vinifera/Vitis riparia	1	9	GO:0009416;GO:0009522;GO:0009523;GO:0009535;GO:0009768;GO:0009941;GO:0010287;GO:0016168;GO:0018298		IPR022796;IPR023329;IPR001344;noIPR;noIPR	;;GO:0009765/GO:0016020;;
Vitvi10g00740_t001	XP_002275075.1 chlorophyll a-b binding protein of LHCII type 1	264	5	7.2e-197	0.9902	Vitis vinifera	1	9	GO:0009416;GO:0009522;GO:0009523;GO:0009535;GO:0009768;GO:0009941;GO:0010287;GO:0016168;GO:0018298		IPR022796;IPR023329;noIPR;IPR001344;noIPR	;;;GO:0009765/GO:0016020;
Vitvi10g00741_t001	CAN78668.1hypothetical protein VITISV_031288	232	1	5.5e-165	0.9955	Vitis vinifera	0.9955				noIPR;noIPR	;
Vitvi10g00742_t001	RVX10881.1LRR receptor-like serine/threonine-protein kinase FLS2	1171	3	0	0.996	Vitis vinifera	1	5	GO:0004672;GO:0005515;GO:0005524;GO:0006468;GO:0016021	EC:2.7.1	noIPR;noIPR;IPR000719;IPR003591;IPR001611;IPR032675;noIPR;IPR001611;noIPR;IPR013210;IPR032675;IPR000719;IPR032675;noIPR;noIPR;noIPR;noIPR;noIPR;noIPR;noIPR;noIPR;noIPR;noIPR;IPR008271;IPR000719;noIPR;noIPR;IPR011009;noIPR;noIPR	;;GO:0005524/GO:0004672/GO:0006468;;GO:0005515;;;GO:0005515;;;;GO:0005524/GO:0004672/GO:0006468;;;;;;;;;;;;GO:0004672/GO:0006468;GO:0005524/GO:0004672/GO:0006468;;;;;
Vitvi10g04411_t001	RVX10881.1LRR receptor-like serine/threonine-protein kinase FLS2	100	1	1e-30	1	Vitis vinifera	1	4	GO:0004672;GO:0005524;GO:0006468;GO:0016021	EC:2.7.1
Vitvi10g04412_t001	XP_034697906.1LRR receptor-like serine/threonine-protein kinase FLS2	281	1	2.4e-181	0.9786	Vitis riparia	0.9786	3	GO:0004672;GO:0005524;GO:0006468	EC:2.7.1	IPR000719;IPR000719;noIPR;noIPR;noIPR;noIPR;noIPR;IPR008271;IPR000719;IPR011009	GO:0005524/GO:0004672/GO:0006468;GO:0005524/GO:0004672/GO:0006468;;;;;;GO:0004672/GO:0006468;GO:0005524/GO:0004672/GO:0006468;
Vitvi10g04413_t001	RVX10883.1LRR receptor-like serine/threonine-protein kinase FLS2	826	1	4.3e-88	0.9891	Vitis vinifera	0.9891	5	GO:0004672;GO:0005515;GO:0005524;GO:0006468;GO:0016021	EC:2.7.1	noIPR;IPR003591;IPR001611;IPR013210;IPR001611;IPR032675;IPR032675;IPR032675;IPR032675;IPR032675;noIPR;noIPR;noIPR;noIPR;noIPR;noIPR	;;GO:0005515;;GO:0005515;;;;;;;;;;;
Vitvi10g00744_t001	XP_002275365.1 transcription factor bHLH144	244	3	1e-168	0.9986	Vitis vinifera	1	2	GO:0005634;GO:0046983		IPR011598;IPR036638;noIPR;IPR037546;IPR011598;IPR036638	GO:0046983;GO:0046983;;;GO:0046983;GO:0046983
Vitvi10g04414_t001	---NA---	96
[truncated: 2,448 more rows]

## Sheet: PN40024_T2T_5.1_ref_blast2go
Sequence Name	Sequence Description	Sequence Length	Blast Hits Count	Blast Min E-Value	Blast Similarity Mean	Blast Top Hit Taxonomy Name	Blast Top Hit Similarity	Annotation GO Count	Annotation GO ID	Enzyme Code	InterPro Accession	InterPro GO ID
[truncated: 238 more rows]
